# Supplementary material for: Leaf Lipid Alterations in Response to Heat Stress of Arabidopsis thaliana
Source: MDPI journal article supplement (doi:10.3390/plants9070845), 2020-07-04

**Figure S1. Selected images of plants in moderate heat stress (main) experiment (below and following).** Images pertain to data in Figures 2 through 8 and S3 through S7. These trays contained wild-type plants, *opr3* plants, and several other mutants not described in this paper. The other mutants did not have heat-related phenotypes readily distinguishable from wild-type. Wild-type plants are identified in the legends near the photos. In trays pictured from above, numbering starts in the upper left corner and proceeds across each row.

Path 1 control plants include: **A.** 28-day-old plants at 0 h into heating experiment (left) and at sampling time (right; 16 h at 21°C; both tray 9). **B.** 28-day-old plants at 0 h into heating experiment (left) and at sampling time (40 h at 21°C; both tray 15).

Path 2 plants in the experiment incorporating a heat treatment of 12 h at 38°C and 4 h at 45°C include: **C.** 28-day-old plants at 0 h into heating experiment (upper left), after 12 h at 38°C, at which time plants are exhibiting hyponasty (right), and at sampling time (lower left) after 12 h at 38°C and 4 h at 45°C (all tray 11). **D.** 27-day-old plants (one day before experiment began, upper left), after 12 h at 38°C, at which time plants are exhibiting hyponasty (2<sup>nd</sup> on left and upper right), after 12 h at 38°C and 4 h at 45°C (3<sup>rd</sup> on left), and at sampling time (lower left and lower right) after 12 h at 38°C, 4 h at 45°C, and 24 h at 21°C (all tray 17).

Path 3 plants in the experiment incorporating a heat treatment of 12 h at 21°C and 4 h at 45°C include: **E.** 28-day-old plants at 0 h into heating experiment (left) and at sampling time (right and lower left) after 12 h at 21°C and 4 h at 45°C (all tray 10). **F.** 28-day-old plants at 0 h into heating experiment (left) and at sampling time (right) after 12 h at 21°C, 4 h at 45°C, and 24 h at 21°C (both tray 16).

- A. Path 1 – 0 h (left) and 16 h (right) at 21°C. They are photos of the same tray (tray 9).  
Wild-type plants are in positions 8, 14, 24, 51, 53, and 71.

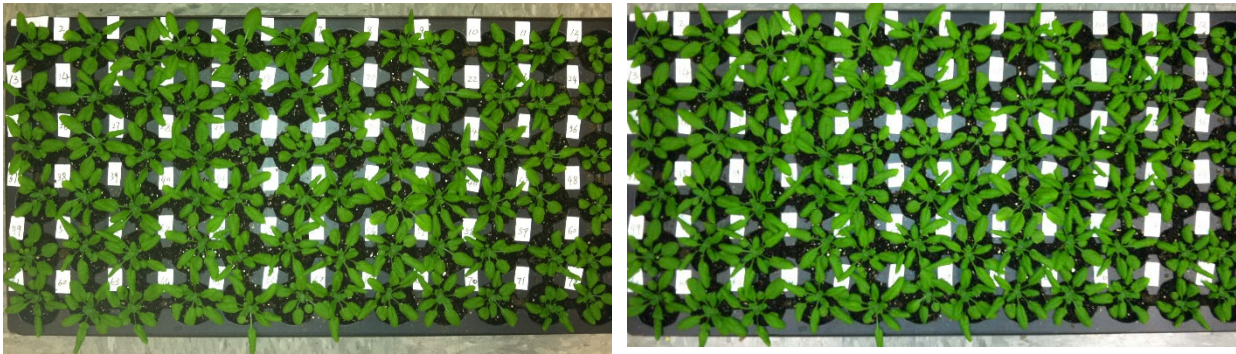

- B. Path 1 – 0 h (left) and 40 h (right) at 21°C. They are photos of the same tray (tray 15). Wild-type plants are in positions 1, 5, 28, 29, 34, and 45.

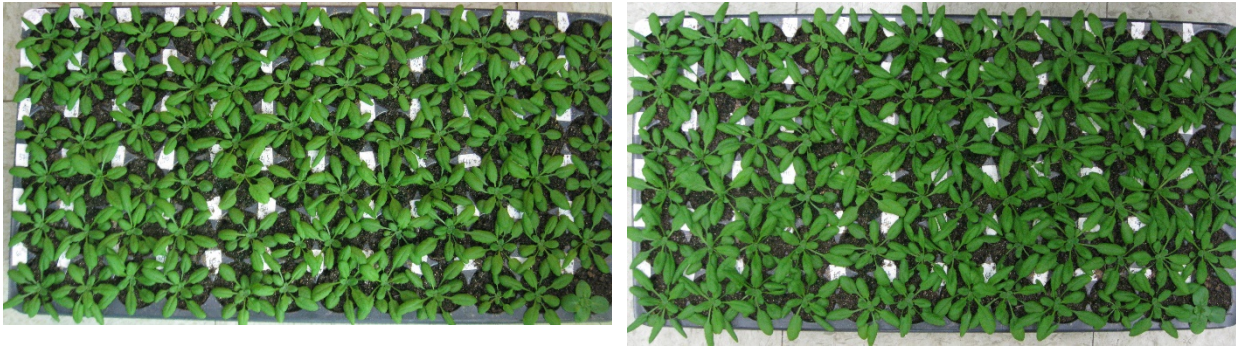

- C. Path 2 – 0 h (upper left), after 12 h at 38°C (right), when plants are exhibiting hyponasty, and at sampling time after 12 h at 38°C and 4 h at 45°C (lower left). They are photos of the same tray (tray 11). Wild-type plants are in positions 8, 14, 24, 51, 53, and 71.

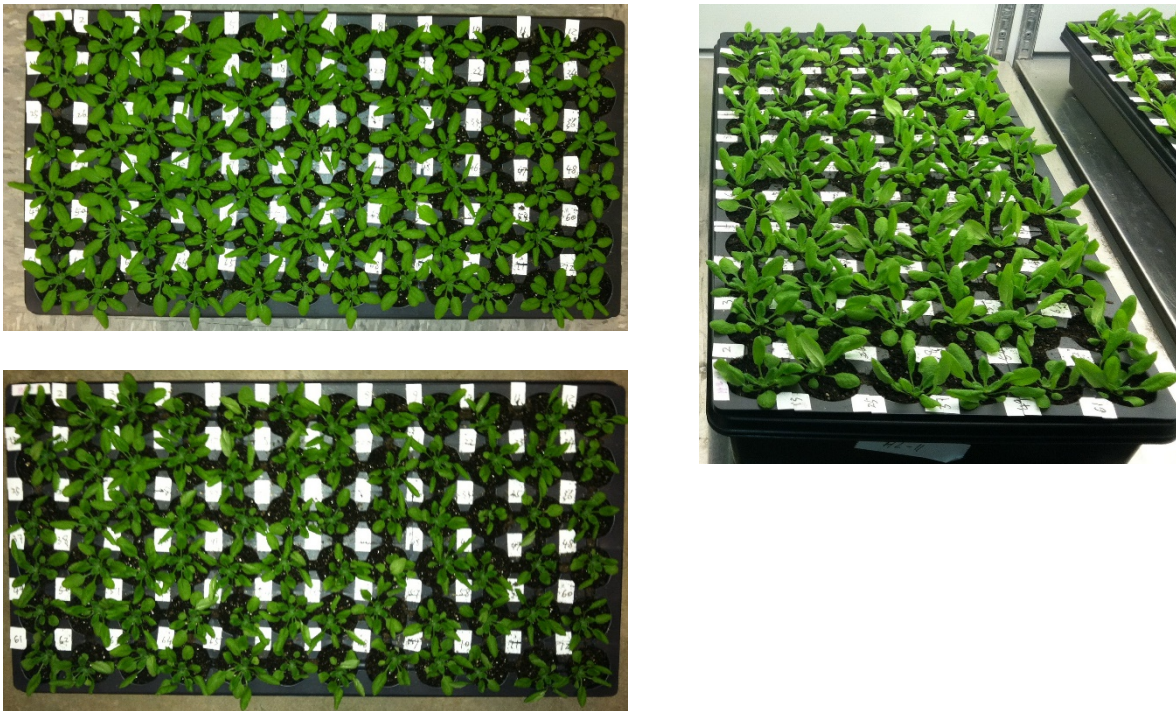



D. Path 2 – One day before the start of the experiment (day 27; upper left), after 12 h at 38°C (second on left and upper right), when plants are exhibiting hyponasty, after 12 h at 38°C and 4 h at 45°C (third on left), and at sampling time after 12 h at 38°C, 4 h at 45°C, and 24 h at 21°C (lower left and lower right). They are photos of the same tray (tray 17). Wild-type plants are in positions 8, 14, 24, 51, 53, and 71.

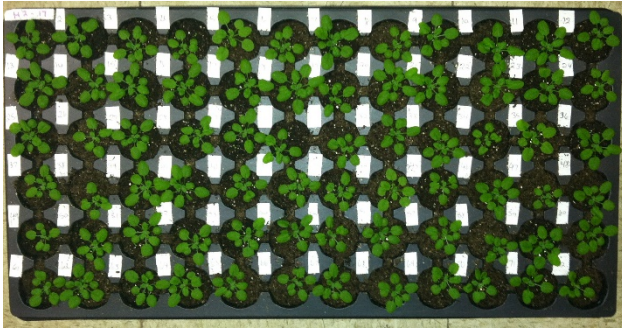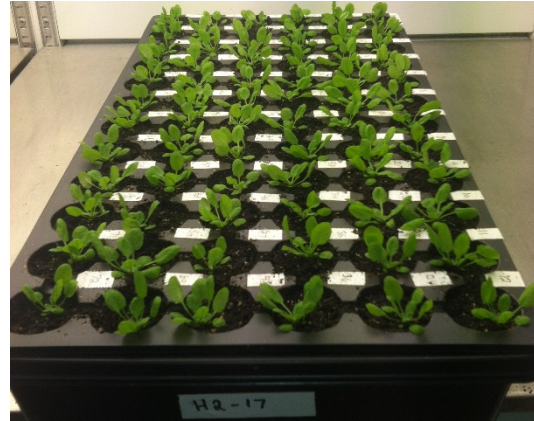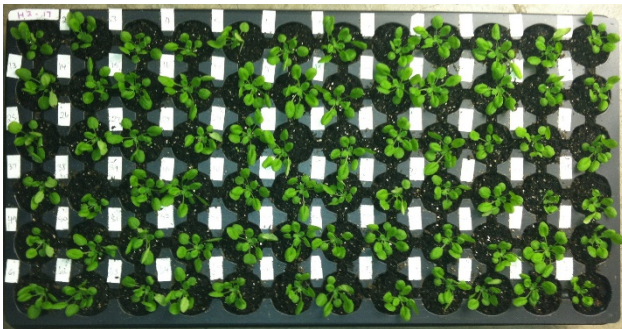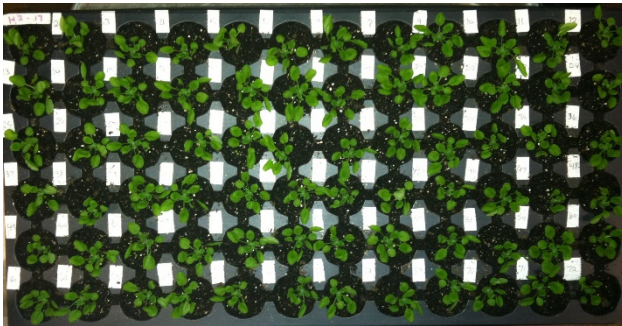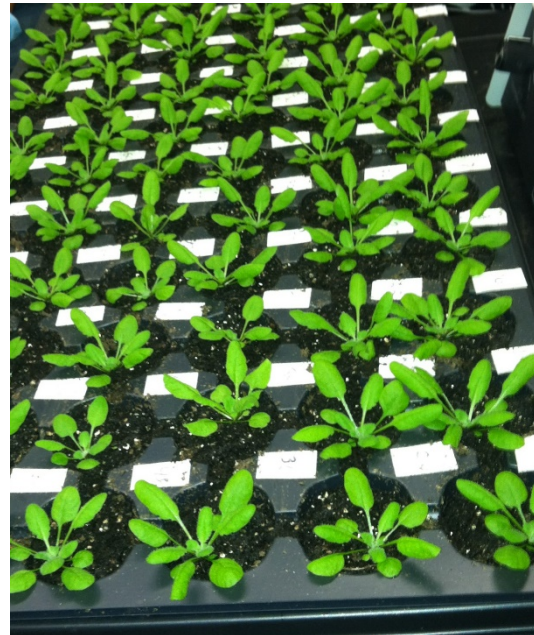



- E. Path 3 – 0 h (upper left), and at sampling time after 12 h at 21°C and 4 h at 45°C (right and lower left). They are photos of the same tray (tray 10). Wild-type plants are in positions 8, 14, 24, 51, 53, and 71.

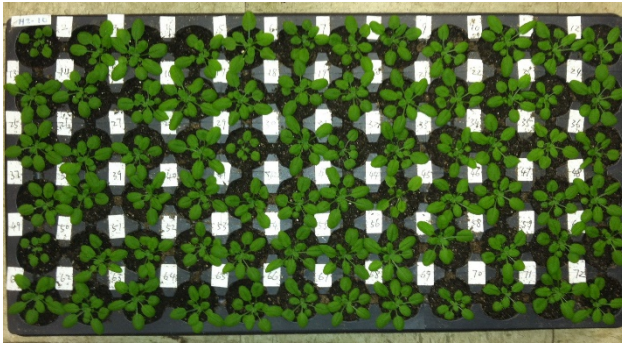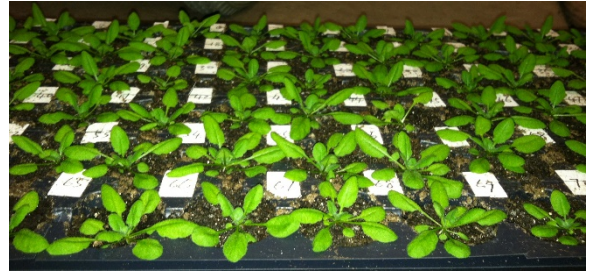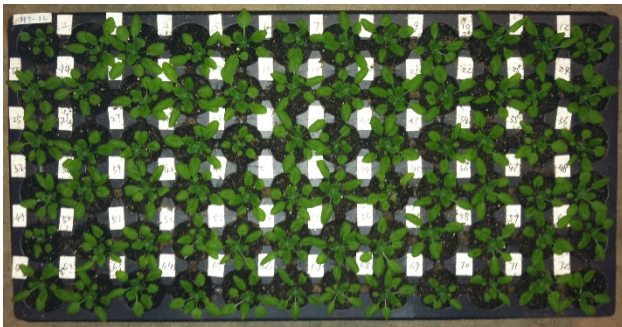

- F. Path 3 – 0 h (left), and at sampling time after 12 h at 21°C, 4 h at 45°C, and 24 h at 21°C (right). They are photos of the same tray (tray 16). Wild-type plants are in positions 8, 14, 24, 51, 53, and 71.

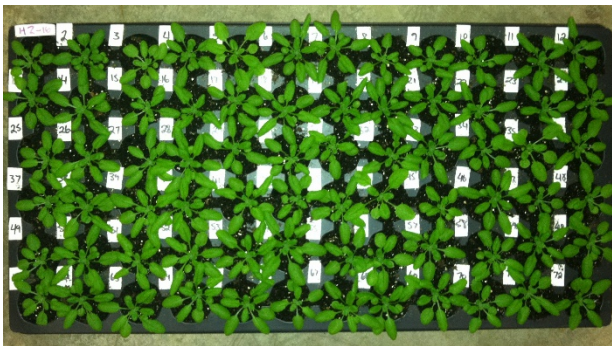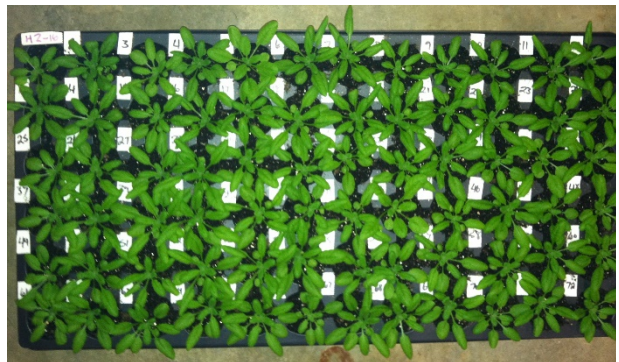

**Figure S2. Levels of Arabidopsides in heat-treated *opr3* mutants in comparison to those of heat-treated wild-type plants (below).** Lipids from both genotypes were extracted from leaves of plants at the 16-h time point of Path 2, i.e., after treatment of 12 h at 38°C and 4 h at 45°C. Though there is a consistent trend of Arabidopside levels being lower in the mutant, none of the wild-type vs *opr3* comparisons indicate significant differences by Student's t-test. The p-values range from 0.12 to 0.22. Error bars represent standard deviation.

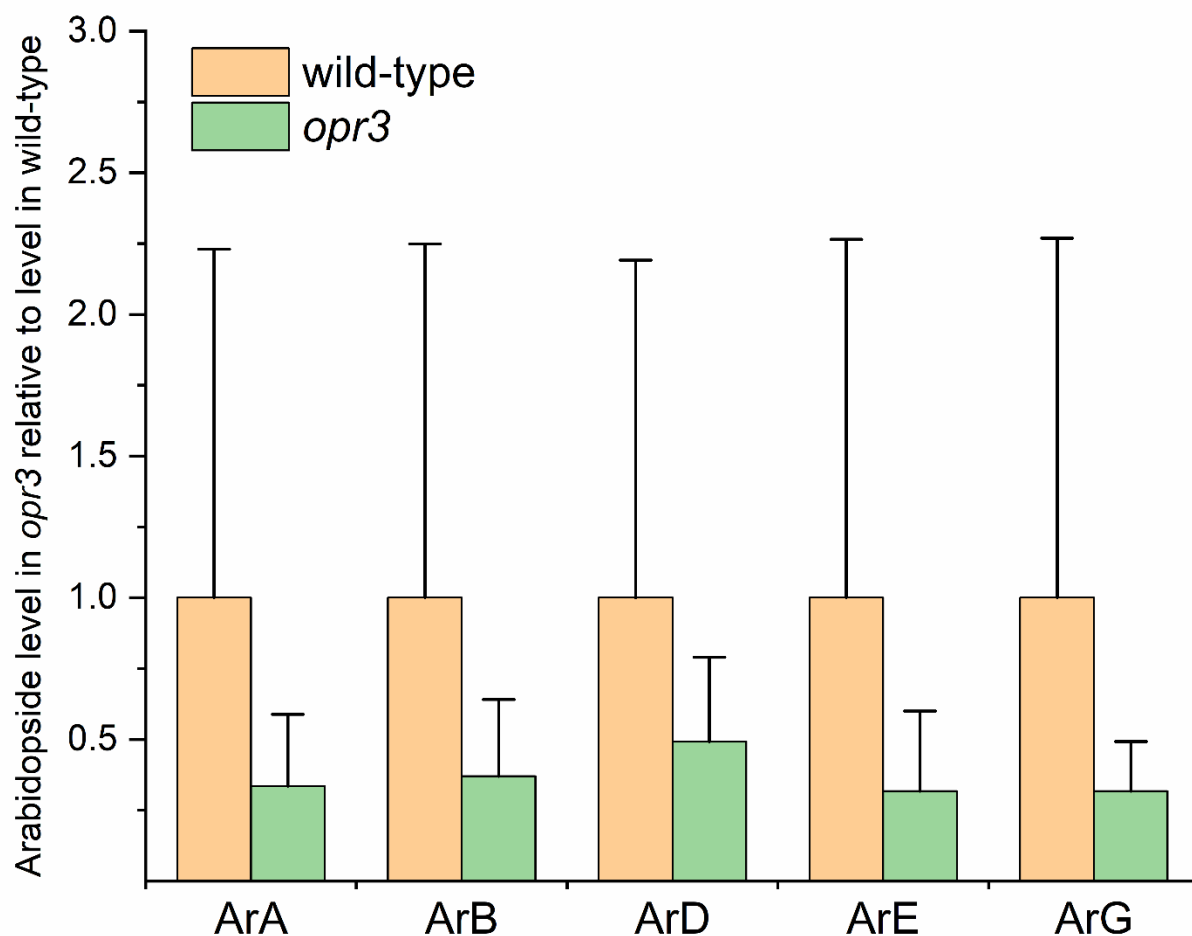

**Figure S3. Chain length indices of control and heat-treated diacyl lipid species from leaves of wild-type *Arabidopsis thaliana* (below).** Length indices indicate the average number of carbon atoms per acyl chain in each lipid class, calculated as described in Materials and Methods. Comparisons were made at the 16-h time point for control plants (Path 1, orange bars), plants treated for 12 h at 38°C followed by 4 h at 45°C (Path 2, green), and 12 h at 21°C followed by 4 h at 45°C (Path 3, lavender). Asterisks indicate significant differences from that of the Path 1 control plants ( $p < 0.05$ ) by one-way ANOVA, with Tukey's multiple comparisons test, adjusted for FDR. Triangles indicate that a Path 3 value is significantly different than a Path 2 value. Error bars indicate standard deviation.

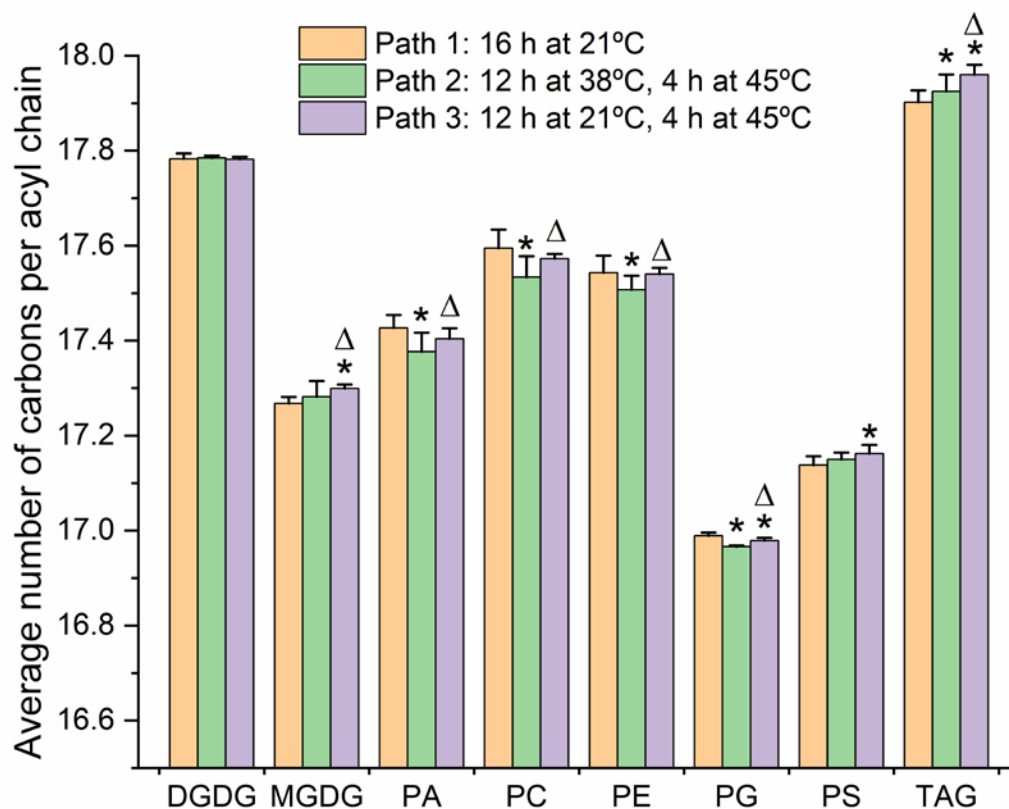



**Figure S4. Selected images of plants in the severe heat stress experiment (below).**

Images illustrate heat stress responses to the treatment used in Figures 9 and 10, Tables 1 and 2, and Tables S8 and S9. Plants shown here were used for the experiments in Tables 1 and 2, i.e., no leaves were removed for lipid analysis. Wild-type plants are in the odd-numbered positions, and *ugtA2,B1* double mutants are in the even-numbered positions for tray positions 1-12, 25-36, and 49-60, while *ugtA2,B1* double mutants are in the odd positions and wild-type plants are in the even positions for positions 13-24, 37-48, and 61-72.

A. Plants at day 30, immediately before heat treatment (top), immediately after treatment at 45°C for 12 h (middle), and after 12 days of recovery at 21°C (bottom). These images are all of the same tray.

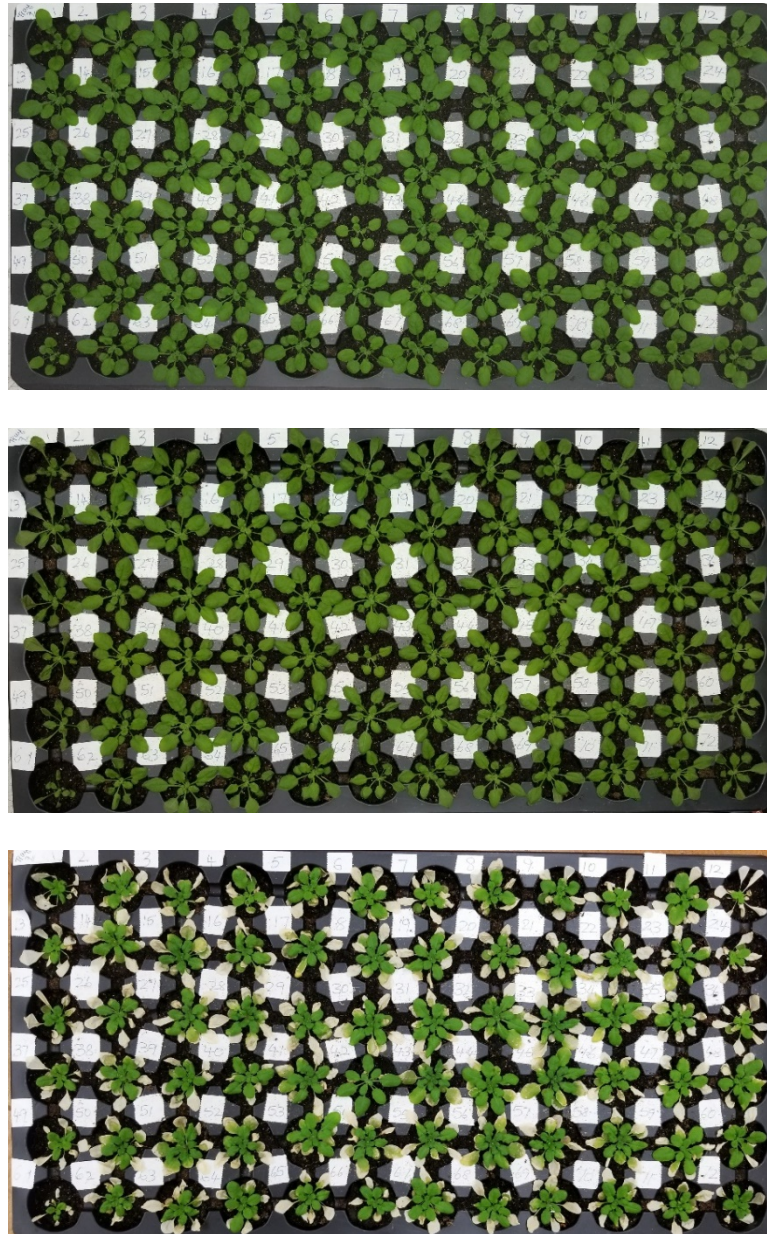

B. Control (untreated) plants at 42 days after growth at 21°C.

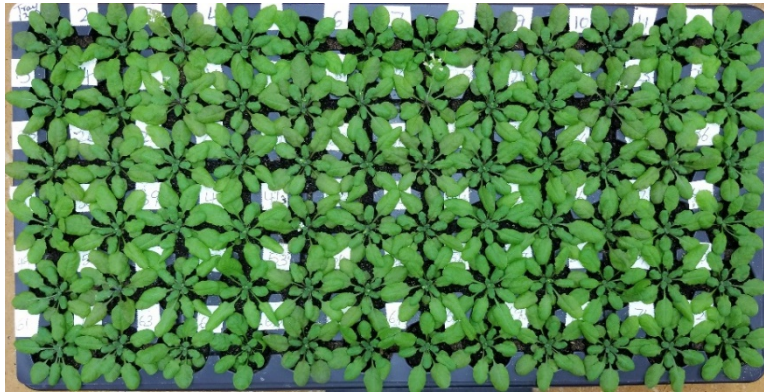

Supplement: s1 [file s1]
