# Supplementary material for: Leaf Lipid Alterations in Response to Heat Stress of Arabidopsis thaliana
Source: Plants (Basel). 2020 Jul 4;9(7):845. doi: 10.3390/plants9070845 (PMC7412450; doi:10.3390/plants9070845)
Supplement: Supplementary file 1 [file plants-09-00845-s001.zip › Tables S1-S10.xlsx]

## Sheet: Table S1
Table S1. Ion leakage of plants in one block (1/3 of plants) in the main heating experiment. At time of harvest, leaves 5 and 6 were placed in deionized water for 2 h, the samples were shaken, and the conductivity was read. Samples were heated to 95-100°C for 2 h, samples were cooled, and conductivity was read again. Ion leakage was calculated as [(first reading minus conductivity of water)*100]/…
Sample name ("H" for "heat"+Block number.Tray number.Well number in tray)	Tray number	Treatment	Path(s)	Genotype	Ion leakage (%)
H1.01.09	1	21° C	1, 2, and 3	wild type	17.36
H1.01.22	1	21° C	1, 2, and 3	wild type	41.22
H1.01.23	1	21° C	1, 2, and 3	wild type	23.64
H1.01.28	1	21° C	1, 2, and 3	wild type	19.39
H1.01.54	1	21° C	1, 2, and 3	wild type	28.21
H1.01.71	1	21° C	1, 2, and 3	wild type	16.28
H1.02.09	2	1 h at 21°C	1 and 3	wild type	23.7
H1.02.22	2	1 h at 21°C	1 and 3	wild type	13.26
H1.02.23	2	1 h at 21°C	1 and 3	wild type	11.87
H1.02.28	2	1 h at 21°C	1 and 3	wild type	7.46
H1.02.54	2	1 h at 21°C	1 and 3	wild type	8.35
H1.02.71	2	1 h at 21°C	1 and 3	wild type	8.18
H1.03.09	3	1 h at 38°C	2	wild type	7.77
H1.03.22	3	1 h at 38°C	2	wild type	13.99
H1.03.23	3	1 h at 38°C	2	wild type	8.77
H1.03.28	3	1 h at 38°C	2	wild type	6.11
H1.03.54	3	1 h at 38°C	2	wild type	7.9
H1.03.71	3	1 h at 38°C	2	wild type	7.3
H1.04.09	4	12 h at 21°C	1 and 3	wild type	21.79
H1.04.22	4	12 h at 21°C	1 and 3	wild type	16.88
H1.04.23	4	12 h at 21°C	1 and 3	wild type	18.9
H1.04.28	4	12 h at 21°C	1 and 3	wild type	8.11
H1.04.54	4	12 h at 21°C	1 and 3	wild type	21.04
H1.04.71	4	12 h at 21°C	1 and 3	wild type	16.81
H1.05.09	5	12 h at 38°C	2	wild type	13.08
H1.05.22	5	12 h at 38°C	2	wild type	9.9
H1.05.23	5	12 h at 38°C	2	wild type	7.76
H1.05.28	5	12 h at 38°C	2	wild type	7.82
H1.05.54	5	12 h at 38°C	2	wild type	6.69
H1.05.71	5	12 h at 38°C	2	wild type	10.03
H1.06.09	6	13 h at 21°C	1	wild type	17.39
H1.06.22	6	13 h at 21°C	1	wild type	14.94
H1.06.23	6	13 h at 21°C	1	wild type	15
H1.06.28	6	13 h at 21°C	1	wild type	19.83
H1.06.54	6	13 h at 21°C	1	wild type	22.12
H1.06.71	6	13 h at 21°C	1	wild type	16.62
H1.07.09	7	12 h at 21°C, 1 h at 45°C	3	wild type	11.91
H1.07.22	7	12 h at 21°C, 1 h at 45°C	3	wild type	10.95
H1.07.23	7	12 h at 21°C, 1 h at 45°C	3	wild type	7.24
H1.07.28	7	12 h at 21°C, 1 h at 45°C	3	wild type	9.65
H1.07.54	7	12 h at 21°C, 1 h at 45°C	3	wild type	8.56
H1.07.71	7	12 h at 21°C, 1 h at 45°C	3	wild type	9.67
H1.08.09	8	12 h at 38°C, 1 h at 45°C	2	wild type	8.97
H1.08.22	8	12 h at 38°C, 1 h at 45°C	2	wild type	10.24
H1.08.23	8	12 h at 38°C, 1 h at 45°C	2	wild type	9.15
H1.08.28	8	12 h at 38°C, 1 h at 45°C	2	wild type	13.7
H1.08.54	8	12 h at 38°C, 1 h at 45°C	2	wild type	6.79
H1.08.71	8	12 h at 38°C, 1 h at 45°C	2	wild type	8.37
H1.09.09	9	16 h at 21°C	1	wild type	10.26
H1.09.22	9	16 h at 21°C	1	wild type	8
H1.09.23	9	16 h at 21°C	1	wild type	7.45
H1.09.28	9	16 h at 21°C	1	wild type	9.95
H1.09.54	9	16 h at 21°C	1	wild type	9.37
H1.09.71	9	16 h at 21°C	1	wild type	10.27
H1.10.09	10	12 h at 21°C, 4 h at 45°C	3	wild type	12.77
H1.10.22	10	12 h at 21°C, 4 h at 45°C	3	wild type	9.36
H1.10.23	10	12 h at 21°C, 4 h at 45°C	3	wild type	8.45
H1.10.28	10	12 h at 21°C, 4 h at 45°C	3	wild type	6.34
H1.10.54	10	12 h at 21°C, 4 h at 45°C	3	wild type	6.3
H1.10.71	10	12 h at 21°C, 4 h at 45°C	3	wild type	7.25
H1.11.09	11	12 h at 38°C, 4 h at 45°C	2	wild type	9.57
H1.11.22	11	12 h at 38°C, 4 h at 45°C	2	wild type	8.5
H1.11.23	11	12 h at 38°C, 4 h at 45°C	2	wild type	9.74
H1.11.28	11	12 h at 38°C, 4 h at 45°C	2	wild type	9.29
H1.11.54	11	12 h at 38°C, 4 h at 45°C	2	wild type	7.62
H1.11.71	11	12 h at 38°C, 4 h at 45°C	2	wild type	5.59
H1.12.09	12	17 h at 21°C	1	wild type	11.69
H1.12.22	12	17 h at 21°C	1	wild type	14.49
H1.12.23	12	17 h at 21°C	1	wild type	15.81
H1.12.28	12	17 h at 21°C	1	wild type	9.09
H1.12.54	12	17 h at 21°C	1	wild type	7.73
H1.12.71	12	17 h at 21°C	1	wild type	9.7
H1.13.09	13	12 h at 21°C, 4 h at 45°C, 1 h at 21°C	3	wild type	11.14
H1.13.22	13	12 h at 21°C, 4 h at 45°C, 1 h at 21°C	3	wild type	9.43
H1.13.23	13	12 h at 21°C, 4 h at 45°C, 1 h at 21°C	3	wild type	9.18
H1.13.28	13	12 h at 21°C, 4 h at 45°C, 1 h at 21°C	3	wild type	10.17
H1.13.54	13	12 h at 21°C, 4 h at 45°C, 1 h at 21°C	3	wild type	10.34
H1.13.71	13	12 h at 21°C, 4 h at 45°C, 1 h at 21°C	3	wild type	6.55
H1.14.09	14	12 h at 38°C, 4 h at 45°C, 1 h at 21°C	2	wild type	9.22
H1.14.22	14	12 h at 38°C, 4 h at 45°C, 1 h at 21°C	2	wild type	7.25
H1.14.23	14	12 h at 38°C, 4 h at 45°C, 1 h at 21°C	2	wild type	9.63
H1.14.28	14	12 h at 38°C, 4 h at 45°C, 1 h at 21°C	2	wild type	8.81
H1.14.54	14	12 h at 38°C, 4 h at 45°C, 1 h at 21°C	2	wild type	8.94
H1.14.71	14	12 h at 38°C, 4 h at 45°C, 1 h at 21°C	2	wild type	5.16
H1.15.09	15	40 h at 21°C	1	wild type	6.83
H1.15.22	15	40 h at 21°C	1	wild type	5.26
H1.15.23	15	40 h at 21°C	1	wild type	5.42
H1.15.28	15	40 h at 21°C	1	wild type	6.49
H1.15.54	15	40 h at 21°C	1	wild type	7.21
H1.15.71	15	40 h at 21°C	1	wild type	4.57
H1.16.09	16	12 h at 21°C, 4 h at 45°C, 24 h at 21°C	3	wild type	11.4
H1.16.22	16	12 h at 21°C, 4 h at 45°C, 24 h at 21°C	3	wild type	7.91
H1.16.23	16	12 h at 21°C, 4 h at 45°C, 24 h at 21°C	3	wild type	5.01
H1.16.28	16	12 h at 21°C, 4 h at 45°C, 24 h at 21°C	3	wild type	6.06
H1.16.54	16	12 h at 21°C, 4 h at 45°C, 24 h at 21°C	3	wild type	10.22
H1.16.71	16	12 h at 21°C, 4 h at 45°C, 24 h at 21°C	3	wild type	9.25
H1.17.09	17	12 h at 38°C, 4 h at 45°C, 24 h at 21°C	2	wild type	10.59
H1.17.22	17	12 h at 38°C, 4 h at 45°C, 24 h at 21°C	2	wild type	7.06
H1.17.23	17	12 h at 38°C, 4 h at 45°C, 24 h at 21°C	2	wild type	7.62
H1.17.28	17	12 h at 38°C, 4 h at 45°C, 24 h at 21°C	2	wild type	9.43
H1.17.54	17	12 h at 38°C, 4 h at 45°C, 24 h at 21°C	2	wild type	8.5
H1.17.71	17	12 h at 38°C, 4 h at 45°C, 24 h at 21°C	2	wild type	6.87
H1.01.11	1	21° C	1, 2, and 3	opr3	16.36
H1.01.48	1	21° C	1, 2, and 3	opr3	31.78
H1.01.52	1	21° C	1, 2, and 3	opr3	15.72
H1.02.11	2	1 h at 21°C	1 and 3	opr3	13.11
H1.02.48	2	1 h at 21°C	1 and 3	opr3	19.09
H1.02.52	2	1 h at 21°C	1 and 3	opr3	19.17
H1.03.11	3	1 h at 38°C	2	opr3	5.49
H1.03.48	3	1 h at 38°C	2	opr3	7.04
H1.03.52	3	1 h at 38°C	2	opr3	5.29
H1.04.11	4	12 h at 21°C	1 and 3	opr3	18.29
H1.04.48	4	12 h at 21°C	1 and 3	opr3	45.22
H1.04.52	4	12 h at 21°C	1 and 3	opr3	29.29
H1.05.11	5	12 h at 38°C	2	opr3	7.8
H1.05.48	5	12 h at 38°C	2	opr3	5.05
H1.05.52	5	12 h at 38°C	2	opr3	8.85
H1.06.11	6	13 h at 21°C	1	opr3	14.57
H1.06.48	6	13 h at 21°C	1	opr3	33.33
H1.06.52	6	13 h at 21°C	1	opr3	9.26
H1.07.11	7	12 h at 21°C, 1 h at 45°C	3	opr3	11.65
H1.07.48	7	12 h at 21°C, 1 h at 45°C	3	opr3	8.37
H1.07.52	7	12 h at 21°C, 1 h at 45°C	3	opr3	7.69
H1.08.11	8	12 h at 38°C, 1 h at 45°C	2	opr3	17.73
H1.08.48	8	12 h at 38°C, 1 h at 45°C	2	opr3	11.55
H1.08.52	8	12 h at 38°C, 1 h at 45°C	2	opr3	10.71
H1.09.11	9	16 h at 21°C	1	opr3	8.18
H1.09.48	9	16 h at 21°C	1	opr3	29.43
H1.09.52	9	16 h at 21°C	1	opr3	7.95
H1.10.11	10	12 h at 21°C, 4 h at 45°C	3	opr3	30.88
H1.10.48	10	12 h at 21°C, 4 h at 45°C	3	opr3	15.22
H1.10.52	10	12 h at 21°C, 4 h at 45°C	3	opr3	6.1
H1.11.11	11	12 h at 38°C, 4 h at 45°C	2	opr3	5.66
H1.11.48	11	12 h at 38°C, 4 h at 45°C	2	opr3	50.23
H1.11.52	11	12 h at 38°C, 4 h at 45°C	2	opr3	7.18
H1.12.11	12	17 h at 21°C	1	opr3	18.05
H1.12.48	12	17 h at 21°C	1	opr3	22.29
H1.12.52	12	17 h at 21°C	1	opr3	11.52
H1.13.11	13	12 h at 21°C, 4 h at 45°C, 1 h at 21°C	3	opr3	9.37
H1.13.48	13	12 h at 21°C, 4 h at 45°C, 1 h at 21°C	3	opr3	13.74
H1.13.52	13	12 h at 21°C, 4 h at 45°C, 1 h at 21°C	3	opr3	8.35
H1.14.11	14	12 h at 38°C, 4 h at 45°C, 1 h at 21°C	2	opr3	9.59
H1.14.48	14	12 h at 38°C, 4 h at 45°C, 1 h at 21°C	2	opr3	6.38
H1.14.52	14	12 h at 38°C, 4 h at 45°C, 1 h at 21°C	2	opr3	6.42
H1.15.11	15	40 h at 21°C	1	opr3	5.93
H1.15.48	15	40 h at 21°C	1	opr3	5.81
H1.15.52	15	40 h at 21°C	1	opr3	5.34
H1.16.11	16	12 h at 21°C, 4 h at 45°C, 24 h at 21°C	3	opr3	10.99
H1.16.48	16	12 h at 21°C, 4 h at 45°C, 24 h at 21°C	3	opr3	12.77
H1.16.52	16	12 h at 21°C, 4 h at 45°C, 24 h at 21°C	3	opr3	10.51
H1.17.11	17	12 h at 38°C, 4 h at 45°C, 24 h at 21°C	2	opr3	6.97
H1.17.48	17	12 h at 38°C, 4 h at 45°C, 24 h at 21°C	2	opr3	6.96
H1.17.52	17	12 h at 38°C, 4 h at 45°C, 24 h at 21°C	2	opr3	5.43
	Tray				Wild-type averages
	1	21° C	1, 2, and 3		24.35
	2	1 h at 21°C	1 and 3		12.1367
	3	1 h at 38°C	2		8.64
	4	12 h at 21°C	1 and 3		17.255
	5	12 h at 38°C	2		9.21333
	6	13 h at 21°C	1		17.65
	7	12 h at 21°C, 1 h at 45°C	3		9.66333
	8	12 h at 38°C, 1 h at 45°C	2		9.53667
	9	16 h at 21°C	1		9.21667
	10	12 h at 21°C, 4 h at 45°C	3		8.41167
	11	12 h at 38°C, 4 h at 45°C	2		8.385
	12	17 h at 21°C	1		11.4183
	13	12 h at 21°C, 4 h at 45°C, 1 h at 21°C	3		9.46833
	14	12 h at 38°C, 4 h at 45°C, 1 h at 21°C	2		8.16833
	15	40 h at 21°C	1		5.96333
	16	12 h at 21°C, 4 h at 45°C, 24 h at 21°C	3		8.30833
	17	12 h at 38°C, 4 h at 45°C, 24 h at 21°C	2		8.345
	Path 1- Wild type				Averages
	1	21° C	1, 2, and 3		24.35
	2	1 h at 21°C	1 and 3		12.1367
	4	12 h at 21°C	1 and 3		17.255
	6	13 h at 21°C	1		17.65
	9	16 h at 21°C	1		9.21667
	12	17 h at 21°C	1		11.4183
	15	40 h at 21°C	1		5.96333
	Path 2- Wild type
	1	21° C	1, 2, and 3		24.35
	3	1 h at 38°C	2		8.64
	5	12 h at 38°C	2		9.21333
	8	12 h at 38°C, 1 h at 45°C	2		9.53667
	11	12 h at 38°C, 4 h at 45°C	2		8.385
	14	12 h at 38°C, 4 h at 45°C, 1 h at 21°C	2		8.16833
	17	12 h at 38°C, 4 h at 45°C, 24 h at 21°C	2		8.345
	Path 3- Wild type
	1	21° C	1, 2, and 3		24.35
	2	1 h at 21°C	1 and 3		12.1367
	4	12 h at 21°C	1 and 3		17.255
	7	12 h at 21°C, 1 h at 45°C	3		9.66333
	10	12 h at 21°C, 4 h at 45°C	3		8.41167
	13	12 h at 21°C, 4 h at 45°C, 1 h at 21°C	3		9.46833
	16	12 h at 21°C, 4 h at 45°C, 24 h at 21°C	3		8.30833

## Sheet: Table S2
Table S2. Lipids analyzed, adducts monitored, mass over charge (m/z) values for intact and fragment ions, collision energies, and internal standards used. Analysis was performed on a Waters Xevo TQS mass spectrometer with argon in the collision cell. Other analytical parameters for most lipid species are provided in Table S5 of reference 11 (Vu et al., 2014, Plant J 80, 728-743). The naming of th…
Lipid number	Lipid name	Chemical formula of M	Positive or negative mode	Adduct monitored	Intact ion m/z monitored	Correct intact ion m/z (minor differences from monitored m/z highlighted)	Fragment m/z monitored	Collision energy (V)	Internal standard 1	Internal standard 2
lipid0599	acDGDG(18:4-O/34:6)	C67H106O17	+	[M+NH4]+	1200.7	1200.74	585.45	23	MGDG(34:0)	MGDG(36:0)
lipid0600	acDGDG(18:4-O/34:7-O)	C67H104O18	+	[M+NH4]+	1214.7	1214.72	599.43	23	MGDG(34:0)	MGDG(36:0)
lipid0601	acDGDG(18:4-O/34:8-2O) or acDGDG(18:4-O/36:6)	C67H102O19 or C69H110O17	+	[M+NH4]+	1228.8	1228.77	613.48	23	MGDG(34:0)	MGDG(36:0)
lipid0603	acDGDG(18:4-O/36:8-2O)	C69H106O19	+	[M+NH4]+	1256.8	1256.73	641.44	23	MGDG(34:0)	MGDG(36:0)
lipid0473	acMGDG(16:0/34:6)	C59H100O11	+	[M+NH4]+	1002.7	1002.73	585.45	23	MGDG(34:0)	MGDG(36:0)
lipid0474	acMGDG(16:0/34:7-O)	C59H98O12	+	[M+NH4]+	1016.7	1016.71	599.43	23	MGDG(34:0)	MGDG(36:0)
lipid0476	acMGDG(16:0/34:8-2O) or acMGDG(16:0/36:6)	C59H96O13 or C61H104O11	+	[M+NH4]+	1030.7	1030.69	613.48	23	MGDG(34:0)	MGDG(36:0)
lipid0483	acMGDG(16:0/36:8-2O)	C61H100O13	+	[M+NH4]+	1058.7	1058.72	641.44	23	MGDG(34:0)	MGDG(36:0)
lipid0468	acMGDG(16:1/34:8-2O) or acMGDG(16:1/36:6)	C59H94O13 or C61H102O11	+	[M+NH4]+	1028.7	1028.74	613.48	23	MGDG(34:0)	MGDG(36:0)
lipid0448	acMGDG(16:3/34:6)	C59H94O11	+	[M+NH4]+	996.7	996.68	585.45	17	MGDG(34:0)	MGDG(36:0)
lipid0454	acMGDG(16:3/34:8-2O) or acMGDG(16:3/36:6)	C59H90O13 or C61H98O11	+	[M+NH4]+	1024.7	1024.71	613.48	23	MGDG(34:0)	MGDG(36:0)
lipid0498	acMGDG(16:3-O/34:8-2O) or acMGDG(16:3-O/36:6)	C59H90O14 or C61H98O12	+	[M+NH4]+	1040.7	1040.71	613.48	23	MGDG(34:0)	MGDG(36:0)
lipid0500	acMGDG(16:3-O/36:8-2O)	C61H94O14	+	[M+NH4]+	1068.7	1068.66	641.44	23	MGDG(34:0)	MGDG(36:0)
lipid0519	acMGDG(16:3-2O/34:6) or acMGDG(18:1/34:6)	C59H94O13 or C61H102O11	+	[M+NH4]+	1028.7	1028.74	585.45	23	MGDG(34:0)	MGDG(36:0)
lipid0522	acMGDG(16:3-2O/34:8-2O) or acMGDG(16:3-2O/36:6) or acMGDG(18:1/34:8-2O) or acMGDG(18:1/36:6)	C59H90O15 or C61H98O13 or C61H98O13 or C63H106O11	+	[M+NH4]+	1056.8	1056.77	613.48	23	MGDG(34:0)	MGDG(36:0)
lipid0525	acMGDG(16:3-2O/36:8-2O) or acMGDG(18:1/36:8-2O)	C61H94O15 or C63H102O13	+	[M+NH4]+	1084.8	1084.73	641.44	23	MGDG(34:0)	MGDG(36:0)
lipid0489	acMGDG(16:4-O/34:8-2O) or acMGDG(16:4-O/36:6)	C59H88O14 or C61H96O12	+	[M+NH4]+	1038.7	1038.69	613.48	23	MGDG(34:0)	MGDG(36:0)
lipid0495	acMGDG(16:4-O/36:8-2O)	C61H92O14	+	[M+NH4]+	1066.7	1066.65	641.44	23	MGDG(34:0)	MGDG(36:0)
lipid0526	acMGDG(18:0/34:6)	C61H104O11	+	[M+NH4]+	1030.8	1030.76	585.45	23	MGDG(34:0)	MGDG(36:0)
lipid0528	acMGDG(18:0/34:8-2O) or acMGDG(18:0/36:6)	C61H100O13 or C63H108O11	+	[M+NH4]+	1058.7	1058.72	613.48	23	MGDG(34:0)	MGDG(36:0)
lipid0514	acMGDG(18:2/34:6)	C61H100O11	+	[M+NH4]+	1026.7	1026.73	585.45	23	MGDG(34:0)	MGDG(36:0)
lipid0515	acMGDG(18:2/34:7-O)	C61H98O12	+	[M+NH4]+	1040.7	1040.71	599.43	23	MGDG(34:0)	MGDG(36:0)
lipid0516	acMGDG(18:2/34:8-2O) or acMGDG(18:2/36:6)	C61H96O13	+	[M+NH4]+	1054.7	1054.69	613.48	23	MGDG(34:0)	MGDG(36:0)
lipid0518	acMGDG(18:2/36:8-2O)	C63H100O13	+	[M+NH4]+	1082.7	1082.72	641.44	23	MGDG(34:0)	MGDG(36:0)
lipid0551	acMGDG(18:2-O/34:8-2O) or acMGDG(18:2-O/36:6)	C61H96O14 or C63H104O12	+	[M+NH4]+	1070.8	1070.75	613.48	23	MGDG(34:0)	MGDG(36:0)
lipid0553	acMGDG(18:2-O/36:8-2O)	C63H100O14	+	[M+NH4]+	1098.7	1098.71	641.44	23	MGDG(34:0)	MGDG(36:0)
lipid0596	acMGDG(18:2-3O/34:8-2O) or acMGDG(18:2-3O/36:6)	C61H96O16 or C63H104O14	+	[M+NH4]+	1102.7	1102.74	613.48	23	MGDG(34:0)	MGDG(36:0)
lipid0501	acMGDG(18:3/34:6)	C61H98O11	+	[M+NH4]+	1024.7	1024.71	585.45	23	MGDG(34:0)	MGDG(36:0)
lipid0506	acMGDG(18:3/34:7-2O) or acMGDG(18:3/36:5)	C61H96O13 or C63H104O11	+	[M+NH4]+	1054.8	1054.76	615.5	23	MGDG(34:0)	MGDG(36:0)
lipid0503	acMGDG(18:3/34:7-O)	C61H96O12	+	[M+NH4]+	1038.7	1038.69	599.43	23	MGDG(34:0)	MGDG(36:0)
lipid0505	acMGDG(18:3/34:8-2O) or acMGDG(18:3/36:6)	C61H94O13 or C63H102O11	+	[M+NH4]+	1052.7	1052.74	613.48	23	MGDG(34:0)	MGDG(36:0)
lipid0508	acMGDG(18:3/36:7-O)	C63H100O12	+	[M+NH4]+	1066.8	1066.72	627.46	23	MGDG(34:0)	MGDG(36:0)
lipid0512	acMGDG(18:3/36:8-2O)	C63H98O13	+	[M+NH4]+	1080.7	1080.7	641.44	23	MGDG(34:0)	MGDG(36:0)
lipid0542	acMGDG(18:3-O/34:6)	C61H98O12	+	[M+NH4]+	1040.7	1040.71	585.45	23	MGDG(34:0)	MGDG(36:0)
lipid0543	acMGDG(18:3-O/34:7-O)	C61H96O13	+	[M+NH4]+	1054.7	1054.69	599.43	23	MGDG(34:0)	MGDG(36:0)
lipid0544	acMGDG(18:3-O/34:8-2O) or acMGDG(18:3-O/36:6)	C61H94O14 or C63H102O12	+	[M+NH4]+	1068.7	1068.74	613.48	23	MGDG(34:0)	MGDG(36:0)
lipid0546	acMGDG(18:3-O/36:6-O)	C63H102O13	+	[M+NH4]+	1084.7	1084.73	629.48	23	MGDG(34:0)	MGDG(36:0)
lipid0545	acMGDG(18:3-O/36:7-O)	C63H100O13	+	[M+NH4]+	1082.7	1082.72	627.46	23	MGDG(34:0)	MGDG(36:0)
lipid0548	acMGDG(18:3-O/36:8-2O)	C63H98O14	+	[M+NH4]+	1096.7	1096.7	641.44	23	MGDG(34:0)	MGDG(36:0)
lipid0566	acMGDG(18:3-2O/34:6)	C61H98O13	+	[M+NH4]+	1056.7	1056.7	585.45	23	MGDG(34:0)	MGDG(36:0)
lipid0570	acMGDG(18:3-2O/34:8-2O) or acMGDG(18:3-2O/36:6)	C61H94O15 or C63H102O13	+	[M+NH4]+	1084.7	1084.73	613.48	23	MGDG(34:0)	MGDG(36:0)
lipid0580	acMGDG(18:3-2O/36:8-2O)	C63H98O15	+	[M+NH4]+	1112.7	1112.69	641.44	23	MGDG(34:0)	MGDG(36:0)
lipid0591	acMGDG(18:3-3O/34:6)	C61H98O14	+	[M+NH4]+	1072.7	1072.7	585.45	23	MGDG(34:0)	MGDG(36:0)
lipid0592	acMGDG(18:3-3O/34:7-O)	C61H96O15	+	[M+NH4]+	1086.7	1086.67	599.43	23	MGDG(34:0)	MGDG(36:0)
lipid0595	acMGDG(18:3-3O/36:8-2O)	C63H98O16	+	[M+NH4]+	1128.7	1128.69	641.44	23	MGDG(34:0)	MGDG(36:0)
lipid0532	acMGDG(18:4-O/34:6)	C61H96O12	+	[M+NH4]+	1038.7	1038.69	585.45	23	MGDG(34:0)	MGDG(36:0)
lipid0533	acMGDG(18:4-O/34:7-O)	C61H94O13	+	[M+NH4]+	1052.7	1052.67	599.43	23	MGDG(34:0)	MGDG(36:0)
lipid0535	acMGDG(18:4-O/34:8-2O) (Arabidopside E) or acMGDG(18:4-O/36:6)	C61H92O14 or C63H100O12	+	[M+NH4]+	1066.7	1066.65	613.48	23	MGDG(34:0)	MGDG(36:0)
lipid0538	acMGDG(18:4-O/36:6-O) or acMGDG(18:4-O/34:9-2O)	C63H100O13 or C61H92O15	+	[M+NH4]+	1082.7	1082.72	629.48	23	MGDG(34:0)	MGDG(36:0)
lipid0575	acMGDG(18:4-O/36:7-2O) (alternative fragmentation)	C63H114O13	+	[M+NH4]+	1096.8	1096.83	625.5	23	MGDG(34:0)	MGDG(36:0)
lipid0537	acMGDG(18:4-O/36:7-O)	C63H98O13	+	[M+NH4]+	1080.7	1080.7	627.46	23	MGDG(34:0)	MGDG(36:0)
lipid0574	acMGDG(18:4-O/36:8-2O) (alternative fragmentation; Arabidopside G)	C63H112O13	+	[M+NH4]+	1094.8	1094.81	623.49	23	MGDG(34:0)	MGDG(36:0)
lipid0540	acMGDG(18:4-O/36:8-2O) (Arabidopside G)	C63H96O14	+	[M+NH4]+	1094.7	1094.68	641.44	23	MGDG(34:0)	MGDG(36:0)
lipid0541	acMGDG(18:4-O/36:6-2O) or acMGDG(18:4-O/38:4)	C63H100O14 or C65H108O12	+	[M+NH4]+	1098.8	1098.78	645.47	23	MGDG(34:0)	MGDG(36:0)
lipid0559	acMGDG(18:4-2O/34:6)	C61H96O13	+	[M+NH4]+	1054.7	1054.69	585.45	23	MGDG(34:0)	MGDG(36:0)
lipid0560	acMGDG(18:4-2O/34:7-O)	C61H94O14	+	[M+NH4]+	1068.7	1068.66	599.43	23	MGDG(34:0)	MGDG(36:0)
lipid0561	acMGDG(18:4-2O/34:8-2O) or acMGDG(18:4-2O/36:6)	C61H92O15 or C63H100O13	+	[M+NH4]+	1082.7	1082.72	613.48	23	MGDG(34:0)	MGDG(36:0)
lipid0565	acMGDG(18:4-2O/36:8-2O)	C63H96O15	+	[M+NH4]+	1110.7	1110.67	641.44	23	MGDG(34:0)	MGDG(36:0)
lipid0586	acMGDG(18:4-3O/34:6)	C61H96O14	+	[M+NH4]+	1070.7	1070.68	585.45	23	MGDG(34:0)	MGDG(36:0)
lipid0587	acMGDG(18:4-3O/34:7-O)	C61H94O15	+	[M+NH4]+	1084.7	1084.66	599.43	23	MGDG(34:0)	MGDG(36:0)
lipid0588	acMGDG(18:4-3O/34:8-2O) or acMGDG(18:4-3O/36:6)	C61H92O16 or C63H100O14	+	[M+NH4]+	1098.7	1098.71	613.48	23	MGDG(34:0)	MGDG(36:0)
lipid0556	acMGDG(18:5-2O/34:8-2O) or acMGDG(18:5-2O/36:6)	C61H90O15 or C63H98O13	+	[M+NH4]+	1080.7	1080.7	613.48	23	MGDG(34:0)	MGDG(36:0)
lipid0558	acMGDG(18:5-2O/36:8-2O)	C63H94O15	+	[M+NH4]+	1108.7	1108.66	641.44	23	MGDG(34:0)	MGDG(36:0)
lipid0293	acPG(16:1/36:8-2O)	C58H95O13P	-	[M-H]-	1029.7	1029.65	793.43	-35	MGDG(34:0)	MGDG(36:0)
lipid0283	DAG(16:0/18:3)	C37H66O5	+	[M+NH4]+	608.5	608.491	313.27	23	TAG(51:3)
lipid0285	DAG(18:2/18:3)	C39H66O5	+	[M+NH4]+	632.5	632.491	337.27	23	TAG(51:3)
lipid0284	DAG(18:3/18:3)	C39H64O5	+	[M+NH4]+	630.5	630.475	335.26	23	TAG(51:3)
lipid0632	DGDG(16:0/18:3-O)	C49H86O16	-	[M+OAc]-	989.6	989.592	293.21	-33	MGDG(34:0)	MGDG(36:0)
lipid0395	DGDG(16:0/18:3-2O)	C49H86O17	-	[M+OAc]-	1005.6	1005.59	291.2	-33	MGDG(34:0)	MGDG(36:0)
lipid0392	DGDG(16:0/18:4-O)	C49H84O16	-	[M+OAc]-	987.6	987.576	291.2	-33	MGDG(34:0)	MGDG(36:0)
lipid0394	DGDG(18:3-2O/16:3)	C49H80O17	-	[M+OAc]-	999.6	999.54	291.2	-33	MGDG(34:0)	MGDG(36:0)
lipid0387	DGDG(18:4-O/16:3)	C49H78O16	-	[M-H]-	921.5	921.529	291.2	-33	MGDG(34:0)	MGDG(36:0)
lipid0338	DGDG(18:4-O/16:4-O) (Arabidopside C)	C49H76O17	-	[M+OAc]-	995.5	995.508	263.19	-33	MGDG(34:0)	MGDG(36:0)
lipid0396	DGDG(18:4-O/18:3)	C51H82O16	-	[M+OAc]-	1009.6	1009.56	291.2	-33	MGDG(34:0)	MGDG(36:0)
lipid0398	DGDG(18:4-O/18:4-O) (Arabidopside D)	C51H80O17	-	[M+OAc]-	1023.5	1023.54	291.2	-33	MGDG(34:0)	MGDG(36:0)
lipid0402	DGDG(18:4-O/18:4-2O) or DGDG(18:4-O/20:2)	C51H80O18 or C53H88O16	-	[M+OAc]-	1039.5	1039.53	291.2	-33	MGDG(34:0)	MGDG(36:0)
lipid0164	DGDG(34:3)	C49H86O15	+	[M+NH4]+	932.6	932.597	591.5	16	DGDG(34:0)	DGDG(36:0)
lipid0163	DGDG(34:4)	C49H84O15	+	[M+NH4]+	930.6	930.581	589.48	16	DGDG(34:0)	DGDG(36:0)
lipid0162	DGDG(34:5)	C49H82O15	+	[M+NH4]+	928.6	928.565	587.49	16	DGDG(34:0)	DGDG(36:0)
lipid0161	DGDG(34:6)	C49H80O15	+	[M+NH4]+	926.6	926.55	585.45	16	DGDG(34:0)	DGDG(36:0)
lipid0170	DGDG(36:3)	C51H90O15	+	[M+NH4]+	960.6	960.628	619.53	16	DGDG(34:0)	DGDG(36:0)
lipid0169	DGDG(36:4)	C51H88O15	+	[M+NH4]+	958.6	958.612	617.51	16	DGDG(34:0)	DGDG(36:0)
lipid0168	DGDG(36:5)	C51H86O15	+	[M+NH4]+	956.6	956.597	615.5	16	DGDG(34:0)	DGDG(36:0)
lipid0167	DGDG(36:6)	C51H84O15	+	[M+NH4]+	954.6	954.581	613.48	16	DGDG(34:0)	DGDG(36:0)
lipid0175	DGDG(36:6-2O) or DGDG(38:4)	C51H84O17 or C53H92O15	+	[M+NH4]+	986.6	986.644	645.47	16	DGDG(34:0)	DGDG(36:0)
lipid0174	DGDG(36:7-2O) or DGDG(38:5)	C51H82O17 or C53H90O15	+	[M+NH4]+	984.6	984.628	643.46	16	DGDG(34:0)	DGDG(36:0)
lipid0173	DGDG(36:8-2O) or DGDG(38:6)	C51H80O17 or C53H88O15	+	[M+NH4]+	982.6	982.612	641.44	16	DGDG(34:0)	DGDG(36:0)
lipid0157	DGMG(16:0)	C31H58O14	+	[M+NH4]+	672.4	672.383	331.23	16	DGDG(34:0)	DGDG(36:0)
lipid0158	DGMG(16:4-O)	C31H50O15	+	[M+NH4]+	680.3	680.315	339.16	16	DGDG(34:0)	DGDG(36:0)
lipid0159	DGMG(18:3)	C33H56O14	+	[M+NH4]+	694.4	694.367	353.21	16	DGDG(34:0)	DGDG(36:0)
lipid0160	DGMG(18:4-O)	C33H54O15	+	[M+NH4]+	708.3	708.346	367.19	16	DGDG(34:0)	DGDG(36:0)
lipid0210	GIPC(42:1)-3	C60H112O24NP	+	[M+NH4]+	1279.7	1279.73	664.62	40	MGDG(34:0)	MGDG(36:0)
lipid0212	GIPC(42:2)-3	C60H110O24NP	+	[M+NH4]+	1277.7	1277.72	662.61	40	MGDG(34:0)	MGDG(36:0)
lipid0226	GlcCer(34:1)-2	C40H77O9N	+	[M+H]+	716.6	716.56	554.51	17	MGDG(34:0)	MGDG(36:0)
lipid0227	GlcCer(34:1)-3	C40H77O10N	+	[M+H]+	732.6	732.555	570.51	17	MGDG(34:0)	MGDG(36:0)
lipid0233	GlcCer(40:1)-3	C46H89O10N	+	[M+H]+	816.7	816.649	654.6	17	MGDG(34:0)	MGDG(36:0)
lipid0237	GlcCer(42:2)-3	C48H91O10N	+	[M+H]+	842.7	842.664	680.62	17	MGDG(34:0)	MGDG(36:0)
lipid0799	LPA(16:0)	C19H39O7P	-	[M-H]-	409.2	409.243	153	-38	LPA(14:0)	LPA(18:0)
lipid0025	LPC(16:0)	C24H50O7PN	+	[M+H]+	496.3	496.332	184.07	28	LPC(13:0)	LPC(19:0)
lipid0028	LPC(18:1)	C26H52O7PN	+	[M+H]+	522.4	522.348	184.07	28	LPC(13:0)	LPC(19:0)
lipid0027	LPC(18:2)	C26H50O7PN	+	[M+H]+	520.3	520.332	184.07	28	LPC(13:0)	LPC(19:0)
lipid0026	LPC(18:3)	C26H48O7PN	+	[M+H]+	518.3	518.317	184.07	28	LPC(13:0)	LPC(19:0)
lipid0052	LPE(16:0)	C21H44O7PN	+	[M+H]+	454.3	454.286	313.27	20	LPE(14:0)	LPE(18:0)
lipid0055	LPE(18:1)	C23H46O7PN	+	[M+H]+	480.3	480.301	339.29	20	LPE(14:0)	LPE(18:0)
lipid0054	LPE(18:2)	C23H44O7PN	+	[M+H]+	478.3	478.286	337.27	20	LPE(14:0)	LPE(18:0)
lipid0053	LPE(18:3)	C23H42O7PN	+	[M+H]+	476.3	476.27	335.26	20	LPE(14:0)	LPE(18:0)
lipid0793	LPI(18:3)	C27H47O12P	-	[M-H]-	593.3	593.281	241.01	-39	PI(34:0)	PI(36:0)
lipid0834	MGDG(16:3/9:1-2O)	C34H56O12	-	[M-H]-	655.4	655.377	187.1	-27	MGDG(34:0)	MGDG(36:0)
lipid0323	MGDG(18:3/16:4-O)	C43H68O11	-	[M+OAc]-	819.5	819.476	263.19	-33	MGDG(34:0)	MGDG(36:0)
lipid0837	MGDG(18:3/7:1-O)	C34H56O11	-	[M-H]-	639.4	639.382	143.07	-33	MGDG(34:0)	MGDG(36:0)
lipid0625	MGDG(18:3-O/16:4-O)	C43H68O12	-	[M+OAc]-	835.5	835.471	293.21	-33	MGDG(34:0)	MGDG(36:0)
lipid0370	MGDG(18:3-2O/16:3)	C43H70O12	-	[M+OAc]-	837.5	837.487	291.2	-33	MGDG(34:0)	MGDG(36:0)
lipid0374	MGDG(18:3-2O/16:4-O) (18:4-O as fragment)	C43H68O13	-	[M+OAc]-	851.5	851.466	291.2	-33	MGDG(34:0)	MGDG(36:0)
lipid0330	MGDG(18:3-2O/16:4-O) or MGDG(20:1/16:4-O) (16:4-O as fragment)	C43H68O13 or C45H76O11	-	[M+OAc]-	851.5	851.466	263.19	-33	MGDG(34:0)	MGDG(36:0)
lipid0383	MGDG(18:3-2O/18:3-O)	C45H74O13	-	[M+OAc]-	881.5	881.513	291.2	-33	MGDG(34:0)	MGDG(36:0)
lipid0358	MGDG(18:4-O/16:3)	C43H68O11	-	[M-H]-	759.5	759.476	291.2	-33	MGDG(34:0)	MGDG(36:0)
lipid0362	MGDG(18:4-O/16:3-O)	C43H68O12	-	[M-H]-	775.5	775.471	291.2	-33	MGDG(34:0)	MGDG(36:0)
lipid0325	MGDG(18:4-O/16:4-O) (16:4-O as fragment; Arabidopside A)	C43H66O12	-	[M+OAc]-	833.5	833.455	263.19	-33	MGDG(34:0)	MGDG(36:0)
lipid0361	MGDG(18:4-O/16:4-O) (18:4-O as fragment; Arabidopside A)	C43H66O12	-	[M-H]-	773.5	773.455	291.2	-33	MGDG(34:0)	MGDG(36:0)
lipid0366	MGDG(18:4-O/18:1) or MGDG(18:4-O/16:3-2O)	C45H76O11 or C43H68O13	-	[M-H]-	791.5	791.539	291.2	-33	MGDG(34:0)	MGDG(36:0)
lipid0373	MGDG(18:4-O/18:2)	C45H74O11	-	[M+OAc]-	849.5	849.523	291.2	-33	MGDG(34:0)	MGDG(36:0)
lipid0372	MGDG(18:4-O/18:3)	C45H72O11	-	[M+OAc]-	847.5	847.507	291.2	-33	MGDG(34:0)	MGDG(36:0)
lipid0376	MGDG(18:4-O/18:3-O)	C45H72O12	-	[M+OAc]-	863.5	863.502	291.2	-33	MGDG(34:0)	MGDG(36:0)
lipid0382	MGDG(18:4-O/18:3-2O) or MGDG(18:4-O/20:3)	C45H72O13 or C47H80O11	-	[M+OAc]-	879.5	879.497	291.2	-33	MGDG(34:0)	MGDG(36:0)
lipid0385	MGDG(18:4-O/18:3-3O)	C45H72O14	-	[M+OAc]-	895.5	895.492	291.2	-33	MGDG(34:0)	MGDG(36:0)
lipid0386	MGDG(18:4-O/18:3-4O)	C45H72O15	-	[M+OAc]-	911.5	911.487	291.2	-33	MGDG(34:0)	MGDG(36:0)
lipid0375	MGDG(18:4-O/18:4-O) (Arabidopside B)	C45H70O12	-	[M+OAc]-	861.5	861.487	291.2	-33	MGDG(34:0)	MGDG(36:0)
lipid0381	MGDG(18:4-O/18:4-2O)	C45H70O13	-	[M+OAc]-	877.5	877.482	291.2	-33	MGDG(34:0)	MGDG(36:0)
lipid0384	MGDG(18:4-O/18:4-3O) or MGDG(18:4-O/19:3-2O)	C45H70O14 or C46H74O13	-	[M+OAc]-	893.5	893.477	291.2	-33	MGDG(34:0)	MGDG(36:0)
lipid0329	MGDG(18:4-2O/16:4-O) or MGDG(20:2/16:4-O)	C43H66O13 or C45H74O11	-	[M+OAc]-	849.5	849.45	263.19	-33	MGDG(34:0)	MGDG(36:0)
lipid0328	MGDG(18:5-2O/16:4-O) or MGDG(20:3/16:4-O)	C43H64O13 or C45H72O11	-	[M+OAc]-	847.4	847.435	263.19	-33	MGDG(34:0)	MGDG(36:0)
lipid0380	MGDG(18:5-2O/18:4-O) or MGDG(20:3/18:4-O)	C45H68O13 or C47H76O11	-	[M+OAc]-	875.5	875.466	291.2	-33	MGDG(34:0)	MGDG(36:0)
lipid0138	MGDG(30:6-O)	C39H62O11	+	[M+NH4]+	724.4	724.429	545.38	14	MGDG(34:0)	MGDG(36:0)
lipid0143	MGDG(34:3)	C43H76O10	+	[M+NH4]+	770.5	770.544	591.5	14	MGDG(34:0)	MGDG(36:0)
lipid0142	MGDG(34:4)	C43H74O10	+	[M+NH4]+	768.5	768.528	589.48	14	MGDG(34:0)	MGDG(36:0)
lipid0141	MGDG(34:5)	C43H72O10	+	[M+NH4]+	766.5	766.513	587.49	14	MGDG(34:0)	MGDG(36:0)
lipid0140	MGDG(34:6)	C43H70O10	+	[M+NH4]+	764.5	764.497	585.45	14	MGDG(34:0)	MGDG(36:0)
lipid0808	MGDG(35:3)	C44H78O10	+	[M+NH4]+	784.5	784.56	605.51	14	MGDG(34:0)	MGDG(36:0)
lipid0149	MGDG(36:3)	C45H80O10	+	[M+NH4]+	798.6	798.575	619.53	14	MGDG(34:0)	MGDG(36:0)
lipid0148	MGDG(36:4) or MGDG(34:6-2O)	C45H78O10 or C43H70O12	+	[M+NH4]+	796.6	796.56	617.51	14	MGDG(34:0)	MGDG(36:0)
lipid0147	MGDG(36:5) or MGDG(34:7-2O)	C45H76O10 or C43H68O12	+	[M+NH4]+	794.5	794.544	615.5	14	MGDG(34:0)	MGDG(36:0)
lipid0146	MGDG(36:6) or MGDG(34:8-2O)	C45H74O10 or C43H66O12	+	[M+NH4]+	792.5	792.528	613.48	14	MGDG(34:0)	MGDG(36:0)
lipid0154	MGDG(36:6-2O) or MGDG(38:4)	C45H74O12 or C47H82O10	+	[M+NH4]+	824.6	824.591	645.47	14	MGDG(34:0)	MGDG(36:0)
lipid0152	MGDG(36:8-2O) or MGDG(38:6)	C45H70O12 or C47H78O10	+	[M+NH4]+	820.6	820.56	641.44	14	MGDG(34:0)	MGDG(36:0)
lipid0153	MGDG(36:7-2O) or MGDG(38:5)	C45H72O12 or C47H80O10	+	[M+NH4]+	822.6	822.575	643.46	14	MGDG(34:0)	MGDG(36:0)
lipid0133	MGMG(16:0)	C25H48O9	+	[M+NH4]+	510.3	510.33	331.23	14	MGDG(34:0)	MGDG(36:0)
lipid0132	MGMG(16:3)	C25H42O9	+	[M+NH4]+	504.3	504.283	325.18	14	MGDG(34:0)	MGDG(36:0)
lipid0135	MGMG(18:3)	C27H46O9	+	[M+NH4]+	532.3	532.314	353.21	14	MGDG(34:0)	MGDG(36:0)
lipid0136	MGMG(18:4-O)	C27H44O10	+	[M+NH4]+	546.3	546.293	367.19	14	MGDG(34:0)	MGDG(36:0)
lipid0273	NAE(16:0)	C18H37NO2	+	[M+H]+	300.3	300.282	62.06	33	PE(24:0)	PE(46:0)
lipid1064	NAPE(18:3/34:3)	C57H100O9PN	+	[M+NH4]+	991.7	991.714	573.4	28	PE(24:0)	PE(46:0)
lipid1065	NAPE(18:3/36:6)	C59H98O9PN	+	[M+NH4]+	1013.7	1013.7	595.4	20	PE(24:0)	PE(46:0)
lipid0126	PA(34:1)	C37H71O8P	+	[M+NH4]+	692.5	692.489	577.52	17	PA(28:0)	PA(40:0)
lipid0125	PA(34:2)	C37H69O8P	+	[M+NH4]+	690.5	690.473	575.5	17	PA(28:0)	PA(40:0)
lipid0124	PA(34:3)	C37H67O8P	+	[M+NH4]+	688.5	688.457	573.49	17	PA(28:0)	PA(40:0)
lipid0123	PA(34:4)	C37H65O8P	+	[M+NH4]+	686.4	686.442	571.47	17	PA(28:0)	PA(40:0)
lipid0121	PA(34:6)	C37H61O8P	+	[M+NH4]+	682.4	682.41	567.44	17	PA(28:0)	PA(40:0)
lipid0131	PA(36:2)	C39H73O8P	+	[M+NH4]+	718.5	718.504	603.53	17	PA(28:0)	PA(40:0)
lipid0130	PA(36:3)	C39H71O8P	+	[M+NH4]+	716.5	716.489	601.52	17	PA(28:0)	PA(40:0)
lipid0129	PA(36:4)	C39H69O8P	+	[M+NH4]+	714.5	714.473	599.5	17	PA(28:0)	PA(40:0)
lipid0128	PA(36:5)	C39H67O8P	+	[M+NH4]+	712.5	712.457	597.49	17	PA(28:0)	PA(40:0)
lipid0127	PA(36:6)	C39H65O8P	+	[M+NH4]+	710.4	710.442	595.47	17	PA(28:0)	PA(40:0)
lipid0624	PC(16:0/18:3-O)	C42H78O9PN	-	[M+OAc]-	830.5	830.541	293.21	-33	MGDG(34:0)	MGDG(36:0)
lipid0371	PC(16:0/18:3-2O)	C42H78O10PN	-	[M+OAc]-	846.5	846.536	291.2	-33	MGDG(34:0)	MGDG(36:0)
lipid0628	PC(18:2/18:3-O)	C44H78O9PN	-	[M+OAc]-	854.5	854.541	293.2	-33	MGDG(34:0)	MGDG(36:0)
lipid0379	PC(18:2/18:3-2O)	C44H78O10PN	-	[M+OAc]-	870.5	870.536	291.2	-33	MGDG(34:0)	MGDG(36:0)
lipid0627	PC(18:3/18:3-O)	C44H76O9PN	-	[M+OAc]-	852.5	852.526	293.21	-33	MGDG(34:0)	MGDG(36:0)
lipid0378	PC(18:3/18:3-2O)	C44H76O10PN	-	[M+OAc]-	868.5	868.521	291.2	-33	MGDG(34:0)	MGDG(36:0)
lipid0030	PC(32:0)	C40H80O8PN	+	[M+H]+	734.6	734.562	184.07	28	PC(24:0)	PC(48:2)
lipid0841	PC(32:1)	C40H78O8PN	+	[M+H]+	732.6	732.547	184.07	28	PC(24:0)	PC(48:2)
lipid0840	PC(32:3)	C40H74O8PN	+	[M+H]+	728.5	728.515	184.07	28	PC(24:0)	PC(48:2)
lipid0035	PC(34:1)	C42H82O8PN	+	[M+H]+	760.6	760.578	184.07	28	PC(24:0)	PC(48:2)
lipid0034	PC(34:2)	C42H80O8PN	+	[M+H]+	758.6	758.562	184.07	28	PC(24:0)	PC(48:2)
lipid0033	PC(34:3)	C42H78O8PN	+	[M+H]+	756.6	756.547	184.07	28	PC(24:0)	PC(48:2)
lipid0032	PC(34:4)	C42H76O8PN	+	[M+H]+	754.5	754.531	184.07	28	PC(24:0)	PC(48:2)
lipid0842	PC(34:6)	C42H72O8PN	+	[M+H]+	750.5	750.5	184.07	28	PC(24:0)	PC(48:2)
lipid0040	PC(36:2)	C44H84O8PN	+	[M+H]+	786.6	786.593	184.07	28	PC(24:0)	PC(48:2)
lipid0039	PC(36:3)	C44H82O8PN	+	[M+H]+	784.6	784.578	184.07	28	PC(24:0)	PC(48:2)
lipid0038	PC(36:4)	C44H80O8PN	+	[M+H]+	782.6	782.562	184.07	28	PC(24:0)	PC(48:2)
lipid0037	PC(36:5)	C44H78O8PN	+	[M+H]+	780.6	780.547	184.07	28	PC(24:0)	PC(48:2)
lipid0036	PC(36:6)	C44H76O8PN	+	[M+H]+	778.5	778.531	184.07	28	PC(24:0)	PC(48:2)
lipid0046	PC(38:2)	C46H88O8PN	+	[M+H]+	814.6	814.625	184.07	28	PC(24:0)	PC(48:2)
lipid0045	PC(38:3)	C46H86O8PN	+	[M+H]+	812.6	812.609	184.07	28	PC(24:0)	PC(48:2)
lipid0044	PC(38:4)	C46H84O8PN	+	[M+H]+	810.6	810.593	184.07	28	PC(24:0)	PC(48:2)
lipid0043	PC(38:5)	C46H82O8PN	+	[M+H]+	808.6	808.578	184.07	28	PC(24:0)	PC(48:2)
lipid0042	PC(38:6)	C46H80O8PN	+	[M+H]+	806.6	806.562	184.07	28	PC(24:0)	PC(48:2)
lipid0050	PC(40:2)	C48H92O8PN	+	[M+H]+	842.7	842.656	184.07	28	PC(24:0)	PC(48:2)
lipid0049	PC(40:3)	C48H90O8PN	+	[M+H]+	840.6	840.64	184.07	28	PC(24:0)	PC(48:2)
lipid0048	PC(40:4)	C48H88O8PN	+	[M+H]+	838.6	838.625	184.07	28	PC(24:0)	PC(48:2)
lipid0047	PC(40:5)	C48H86O8PN	+	[M+H]+	836.6	836.609	184.07	28	PC(24:0)	PC(48:2)
lipid0618	PE(16:0/18:3-O)	C39H72O9PN	-	[M-H]-	728.5	728.494	293.21	-33	MGDG(34:0)	MGDG(36:0)
lipid0355	PE(16:0/18:3-2O)	C39H72O10PN	-	[M-H]-	744.5	744.489	291.2	-33	MGDG(34:0)	MGDG(36:0)
lipid0413	PE(16:0/18:3-3O)	C39H72O11PN	-	[M-H]-	760.5	760.484	325.2	-33	MGDG(34:0)	MGDG(36:0)
lipid0620	PE(18:2/18:3-O)	C41H72O9PN	-	[M-H]-	752.5	752.494	293.21	-33	MGDG(34:0)	MGDG(36:0)
lipid0360	PE(18:2/18:3-2O)	C41H72O10PN	-	[M-H]-	768.5	768.489	291.2	-33	MGDG(34:0)	MGDG(36:0)
lipid0415	PE(18:2/18:3-3O)	C41H72O11PN	-	[M-H]-	784.5	784.484	325.2	-33	MGDG(34:0)	MGDG(36:0)
lipid0427	PE(16:0/18:2-O)	C39H74O9PN	-	[M-H]-	730.5	730.51	295.23	-33	MGDG(34:0)	MGDG(36:0)
lipid0619	PE(18:3/18:3-O)	C41H70O9PN	-	[M-H]-	750.5	750.479	293.21	-33	MGDG(34:0)	MGDG(36:0)
lipid0359	PE(18:3/18:3-2O)	C41H70O10PN	-	[M-H]-	766.5	766.474	291.2	-33	MGDG(34:0)	MGDG(36:0)
lipid0414	PE(18:3/18:3-3O)	C41H70O11PN	-	[M-H]-	782.5	782.469	325.2	-33	MGDG(34:0)	MGDG(36:0)
lipid0060	PE(32:0)	C37H74O8PN	+	[M+H]+	692.5	692.515	551.5	20	PE(24:0)	PE(46:0)
lipid0059	PE(32:1)	C37H72O8PN	+	[M+H]+	690.5	690.5	549.49	20	PE(24:0)	PE(46:0)
lipid0057	PE(32:3)	C37H68O8PN	+	[M+H]+	686.5	686.468	545.46	20	PE(24:0)	PE(46:0)
lipid0063	PE(34:2)	C39H74O8PN	+	[M+H]+	716.5	716.515	575.5	20	PE(24:0)	PE(46:0)
lipid0062	PE(34:3)	C39H72O8PN	+	[M+H]+	714.5	714.5	573.49	20	PE(24:0)	PE(46:0)
lipid0061	PE(34:4)	C39H70O8PN	+	[M+H]+	712.5	712.484	571.47	20	PE(24:0)	PE(46:0)
lipid0069	PE(36:2)	C41H78O8PN	+	[M+H]+	744.5	744.547	603.53	20	PE(24:0)	PE(46:0)
lipid0068	PE(36:3)	C41H76O8PN	+	[M+H]+	742.5	742.531	601.52	20	PE(24:0)	PE(46:0)
lipid0067	PE(36:4)	C41H74O8PN	+	[M+H]+	740.5	740.515	599.5	20	PE(24:0)	PE(46:0)
lipid0066	PE(36:5)	C41H72O8PN	+	[M+H]+	738.5	738.5	597.49	20	PE(24:0)	PE(46:0)
lipid0065	PE(36:6)	C41H70O8PN	+	[M+H]+	736.5	736.484	595.47	20	PE(24:0)	PE(46:0)
lipid0807	PE(38:2)	C43H82O8PN	+	[M+H]+	772.6	772.578	631.57	20	PE(24:0)	PE(46:0)
lipid0074	PE(38:3)	C43H80O8PN	+	[M+H]+	770.6	770.562	629.55	20	PE(24:0)	PE(46:0)
lipid0073	PE(38:4)	C43H78O8PN	+	[M+H]+	768.5	768.547	627.53	20	PE(24:0)	PE(46:0)
lipid0072	PE(38:5)	C43H76O8PN	+	[M+H]+	766.5	766.531	625.52	20	PE(24:0)	PE(46:0)
lipid0076	PE(40:2)	C45H86O8PN	+	[M+H]+	800.6	800.609	659.6	20	PE(24:0)	PE(46:0)
lipid0075	PE(40:3)	C45H84O8PN	+	[M+H]+	798.6	798.593	657.58	20	PE(24:0)	PE(46:0)
lipid0079	PE(42:2)	C47H90O8PN	+	[M+H]+	828.6	828.64	687.63	20	PE(24:0)	PE(46:0)
lipid1003	PE(42:3) (measured in negative mode)	C47H88O8PN	-	[M-H]-	824.6	824.625	153	-38	MGDG(34:0)	MGDG(36:0)
lipid0078	PE(42:3) (measured in positive mode)	C47H88O8PN	+	[M+H]+	826.6	826.625	685.61	20	PE(24:0)	PE(46:0)
lipid0353	PG(18:2/16:0-O)	C40H75O11P	-	[M-H]-	761.5	761.505	271.23	-33	MGDG(34:0)	MGDG(36:0)
lipid0431	PG(18:2-O/16:1)	C40H73O11P	-	[M-H]-	759.5	759.489	295.23	-33	MGDG(34:0)	MGDG(36:0)
lipid0622	PG(18:3-O/16:0)	C40H73O11P	-	[M-H]-	759.5	759.489	293.21	-33	MGDG(34:0)	MGDG(36:0)
lipid0621	PG(18:3-O/16:1)	C40H71O11P	-	[M-H]-	757.5	757.473	293.21	-33	MGDG(34:0)	MGDG(36:0)
lipid0357	PG(18:4-O/16:0)	C40H71O11P	-	[M-H]-	757.5	757.473	291.2	-33	MGDG(34:0)	MGDG(36:0)
lipid0356	PG(18:4-O/16:1)	C40H69O11P	-	[M-H]-	755.5	755.458	291.2	-33	MGDG(34:0)	MGDG(36:0)
lipid0364	PG(18:4-O/18:2)	C42H71O11P	-	[M-H]-	781.5	781.473	291.2	-33	MGDG(34:0)	MGDG(36:0)
lipid0363	PG(18:4-O/18:3)	C42H69O11P	-	[M-H]-	779.5	779.458	291.2	-33	MGDG(34:0)	MGDG(36:0)
lipid0008	PG(32:0)	C38H75O10P	+	[M+NH4]+	740.5	740.51	551.5	17	PG(28:0)
lipid0007	PG(32:1)	C38H73O10P	+	[M+NH4]+	738.5	738.494	549.49	17	PG(28:0)
lipid0012	PG(34:1)	C40H77O10P	+	[M+NH4]+	766.5	766.525	577.52	17	PG(28:0)
lipid0011	PG(34:2)	C40H75O10P	+	[M+NH4]+	764.5	764.51	575.5	17	PG(28:0)
lipid0010	PG(34:3)	C40H73O10P	+	[M+NH4]+	762.5	762.494	573.49	17	PG(28:0)
lipid0009	PG(34:4)	C40H71O10P	+	[M+NH4]+	760.5	760.478	571.47	17	PG(28:0)
lipid0018	PG(36:2)	C42H79O10P	+	[M+NH4]+	792.5	792.541	603.53	17	PG(28:0)
lipid0017	PG(36:3)	C42H77O10P	+	[M+NH4]+	790.5	790.525	601.52	17	PG(28:0)
lipid0016	PG(36:4)	C42H75O10P	+	[M+NH4]+	788.5	788.51	599.5	17	PG(28:0)
lipid0015	PG(36:5)	C42H73O10P	+	[M+NH4]+	786.5	786.494	597.49	17	PG(28:0)
lipid0014	PG(36:6)	C42H71O10P	+	[M+NH4]+	784.5	784.478	595.47	17	PG(28:0)
lipid0086	PI(34:2)	C43H79O13P	+	[M+NH4]+	852.5	852.526	575.5	17	PG(28:0)
lipid1001	PI(34:3) (measured in negative mode)	C43H77O13P	-	[M-H]-	831.5	831.51	241.01	-39	MGDG(34:0)	MGDG(36:0)
lipid0085	PI(34:3) (measured in positive mode)	C43H77O13P	+	[M+NH4]+	850.5	850.51	573.49	17	PG(28:0)
lipid0095	PS(34:3)	C40H72O10PN	+	[M+H]+	758.5	758.489	573.49	17	PS(28:0)	PS(40:0)
lipid0116	PS(42:2)	C48H90O10PN	+	[M+H]+	872.6	872.63	687.63	17	PS(28:0)	PS(40:0)
lipid0115	PS(42:3)	C48H88O10PN	+	[M+H]+	870.6	870.615	685.61	17	PS(28:0)	PS(40:0)
lipid0248	Campesterol-Glc	C34H58O6	+	[M+NH4]+	580.5	580.423	383.37	14	MGDG(34:0)	MGDG(36:0)
lipid0255	Campesterol-Glc(16:0)	C50H88O7	+	[M+NH4]+	818.7	818.653	383.37	13	MGDG(34:0)	MGDG(36:0)
lipid0261	Campesterol-Glc(18:2)	C52H88O7	+	[M+NH4]+	842.7	842.653	383.37	13	MGDG(34:0)	MGDG(36:0)
lipid0258	Campesterol-Glc(18:3)	C52H86O7	+	[M+NH4]+	840.7	840.637	383.37	13	MGDG(34:0)	MGDG(36:0)
lipid0816	Campesterol-Glc(18:4-O)	C52H84O8	+	[M+NH4]+	854.7	854.617	383.37	17	MGDG(34:0)	MGDG(36:0)
lipid0821	Sitosterol(18:2)	C47H80O2	+	[M+NH4]+	694.7	694.616	397.38	23	TAG(51:3)
lipid0289	Sitosterol(18:3)	C47H78O2	+	[M+NH4]+	692.6	692.6	397.38	23	TAG(51:3)
lipid0250	Sitosterol-Glc	C35H60O6	+	[M+NH4]+	594.5	594.439	397.38	14	MGDG(34:0)	MGDG(36:0)
lipid0257	Sitosterol-Glc(16:0)	C51H90O7	+	[M+NH4]+	832.7	832.669	397.38	13	MGDG(34:0)	MGDG(36:0)
lipid0263	Sitosterol-Glc(18:2)	C53H90O7	+	[M+NH4]+	856.7	856.669	397.38	13	MGDG(34:0)	MGDG(36:0)
lipid0260	Sitosterol-Glc(18:3)	C53H88O7	+	[M+NH4]+	854.7	854.653	397.38	13	MGDG(34:0)	MGDG(36:0)
lipid0818	Sitosterol-Glc(18:4-O)	C53H86O8	+	[M+NH4]+	868.7	868.632	397.38	17	MGDG(34:0)	MGDG(36:0)
lipid0249	Stigmasterol-Glc	C35H58O6	+	[M+NH4]+	592.5	592.423	395.37	14	MGDG(34:0)	MGDG(36:0)
lipid0256	Stigmasterol-Glc(16:0)	C51H88O7	+	[M+NH4]+	830.7	830.653	395.37	13	MGDG(34:0)	MGDG(36:0)
lipid0262	Stigmasterol-Glc(18:2)	C53H88O7	+	[M+NH4]+	854.7	854.653	395.37	13	MGDG(34:0)	MGDG(36:0)
lipid0259	Stigmasterol-Glc(18:3)	C53H86O7	+	[M+NH4]+	852.7	852.637	395.37	13	MGDG(34:0)	MGDG(36:0)
lipid0817	Stigmasterol-Glc(18:4-O)	C53H84O8	+	[M+NH4]+	866.7	866.617	395.37	17	MGDG(34:0)	MGDG(36:0)
lipid0182	SQDG(32:0)	C41H78O12S	-	[M-H]-	793.5	793.521	225.01	-38	MGDG(34:0)	MGDG(36:0)
lipid0186	SQDG(34:3)	C43H76O12S	-	[M-H]-	815.5	815.506	225.01	-38	MGDG(34:0)	MGDG(36:0)
lipid1061	SQDG(34:4-O)	C43H74O13S	+	[M+NH4]+	848.5	848.485	587.4	24	MGDG(34:0)	MGDG(36:0)
lipid0189	SQDG(36:6)	C45H74O12S	-	[M-H]-	837.5	837.49	225.01	-38	MGDG(34:0)	MGDG(36:0)
lipid1063	SQDG(36:8-2O)	C45H70O14S	+	[M+NH4]+	884.4	884.449	623.3	24	MGDG(34:0)	MGDG(36:0)
lipid1060	TAG(16:0/34:6)	C53H90O6	+	[M+NH4]+	840.7	840.674	567.4	23	TAG(51:3)
lipid0280	TAG(18:2/36:5)	C57H96O6	+	[M+NH4]+	894.8	894.721	597.49	23	TAG(51:3)
lipid0276	TAG(18:3/34:2)	C55H96O6	+	[M+NH4]+	870.8	870.721	575.5	23	TAG(51:3)
lipid1062	TAG(18:3/34:6)	C55H88O6	+	[M+NH4]+	862.7	862.658	567.4	23	TAG(51:3)
lipid0278	TAG(18:3/36:5)	C57H94O6	+	[M+NH4]+	892.7	892.705	597.49	23	TAG(51:3)
lipid0277	TAG(18:3/36:6)	C57H92O6	+	[M+NH4]+	890.7	890.689	595.47	23	TAG(51:3)
lipid0305	TeGDG(34:6)	C61H100O25	+	[M+NH4]+	1250.7	1250.66	585.45	20	MGDG(34:0)	MGDG(36:0)
lipid0309	TeGDG(36:6)	C63H104O25	+	[M+NH4]+	1278.7	1278.69	613.5	20	MGDG(34:0)	MGDG(36:0)
lipid0294	TrGDG(34:6)	C55H90O20	+	[M+NH4]+	1088.6	1088.6	585.45	20	MGDG(34:0)	MGDG(36:0)
lipid0298	TrGDG(36:6)	C57H94O20	+	[M+NH4]+	1116.7	1116.63	613.48	20	MGDG(34:0)	MGDG(36:0)

## Sheet: Table S3
Table S3. Quality of data. Average values of quality control (QC) samples, which are a pool of the experimental samples, are compared to the limit of detection (LOD, 0.25 normalized intensity units). The coefficient of variation (CoV) was determined on the quality control samples, run at intervals throughout the analysis. Details of the sample arrangements are in Table S6. Details on the trending…
Lipid number	Lipid name	Average value of quality control (QC) samples	"x" indicates the lipid did not meet LOD criterion of > 0.25 normalized intensity units	CoV after trending within each day's analysis and normalization across days of analysis	"x" indicates the lipid did not meet CoV standard of < 0.20
lipid0599	acDGDG(18:4-O/34:6)	2.66088		0.0693528
lipid0600	acDGDG(18:4-O/34:7-O)	1.79962		0.0725371
lipid0601	acDGDG(18:4-O/34:8-2O) or acDGDG(18:4-O/36:6)	20.0319		0.157632
lipid0603	acDGDG(18:4-O/36:8-2O)	1.12964		0.104754
lipid0473	acMGDG(16:0/34:6)	5.94854		0.0626498
lipid0474	acMGDG(16:0/34:7-O)	7.46122		0.0600164
lipid0476	acMGDG(16:0/34:8-2O) or acMGDG(16:0/36:6)	10.8042		0.0755146
lipid0483	acMGDG(16:0/36:8-2O)	3.38875		0.122775
lipid0468	acMGDG(16:1/34:8-2O) or acMGDG(16:1/36:6)	10.6063		0.0713356
lipid0448	acMGDG(16:3/34:6)	5.22769		0.0622453
lipid0454	acMGDG(16:3/34:8-2O) or acMGDG(16:3/36:6)	10.3937		0.0539612
lipid0498	acMGDG(16:3-O/34:8-2O) or acMGDG(16:3-O/36:6)	6.40612		0.105129
lipid0500	acMGDG(16:3-O/36:8-2O)	3.03628		0.087481
lipid0519	acMGDG(16:3-2O/34:6) or acMGDG(18:1/34:6)	5.12479		0.0853198
lipid0522	acMGDG(16:3-2O/34:8-2O) or acMGDG(16:3-2O/36:6) or acMGDG(18:1/34:8-2O) or acMGDG(18:1/36:6)	15.0922		0.0629263
lipid0525	acMGDG(16:3-2O/36:8-2O) or acMGDG(18:1/36:8-2O)	3.07727		0.0913878
lipid0489	acMGDG(16:4-O/34:8-2O) or acMGDG(16:4-O/36:6)	10.7254		0.102195
lipid0495	acMGDG(16:4-O/36:8-2O)	2.18971		0.134239
lipid0526	acMGDG(18:0/34:6)	4.35009		0.067673
lipid0528	acMGDG(18:0/34:8-2O) or acMGDG(18:0/36:6)	6.08314		0.100284
lipid0514	acMGDG(18:2/34:6)	4.57189		0.0858681
lipid0515	acMGDG(18:2/34:7-O)	4.9565		0.0570006
lipid0516	acMGDG(18:2/34:8-2O) or acMGDG(18:2/36:6)	14.1255		0.0838408
lipid0518	acMGDG(18:2/36:8-2O)	3.09467		0.151741
lipid0551	acMGDG(18:2-O/34:8-2O) or acMGDG(18:2-O/36:6)	9.77035		0.0900782
lipid0553	acMGDG(18:2-O/36:8-2O)	3.51866		0.0734781
lipid0596	acMGDG(18:2-3O/34:8-2O) or acMGDG(18:2-3O/36:6)	20.8184		0.0897917
lipid0501	acMGDG(18:3/34:6)	5.18462		0.0751208
lipid0506	acMGDG(18:3/34:7-2O) or acMGDG(18:3/36:5)	8.36279		0.06554
lipid0503	acMGDG(18:3/34:7-O)	3.36538		0.0907074
lipid0505	acMGDG(18:3/34:8-2O) or acMGDG(18:3/36:6)	7.1406		0.0812081
lipid0508	acMGDG(18:3/36:7-O)	3.65562		0.0871911
lipid0512	acMGDG(18:3/36:8-2O)	3.54141		0.103591
lipid0542	acMGDG(18:3-O/34:6)	4.09086		0.0606669
lipid0543	acMGDG(18:3-O/34:7-O)	3.35		0.0758287
lipid0544	acMGDG(18:3-O/34:8-2O) or acMGDG(18:3-O/36:6)	11.0226		0.0872898
lipid0546	acMGDG(18:3-O/36:6-O)	4.4608		0.0907956
lipid0545	acMGDG(18:3-O/36:7-O)	4.40238		0.138264
lipid0548	acMGDG(18:3-O/36:8-2O)	1.88133		0.167141
lipid0566	acMGDG(18:3-2O/34:6)	2.9987		0.099595
lipid0570	acMGDG(18:3-2O/34:8-2O) or acMGDG(18:3-2O/36:6)	37.7635		0.0668779
lipid0580	acMGDG(18:3-2O/36:8-2O)	2.2183		0.107709
lipid0591	acMGDG(18:3-3O/34:6)	2.05469		0.0773784
lipid0592	acMGDG(18:3-3O/34:7-O)	2.575		0.0681379
lipid0595	acMGDG(18:3-3O/36:8-2O)	2.14381		0.0916208
lipid0532	acMGDG(18:4-O/34:6)	2.28752		0.0909765
lipid0533	acMGDG(18:4-O/34:7-O)	2.95327		0.0765332
lipid0535	acMGDG(18:4-O/34:8-2O) (Arabidopside E) or acMGDG(18:4-O/36:6)	11.9333		0.0634203
lipid0538	acMGDG(18:4-O/36:6-O) or acMGDG(18:4-O/34:9-2O)	4.24232		0.085257
lipid0575	acMGDG(18:4-O/36:7-2O) (alternative fragmentation)	2.79653		0.0745733
lipid0537	acMGDG(18:4-O/36:7-O)	3.50815		0.129557
lipid0574	acMGDG(18:4-O/36:8-2O) (alternative fragmentation; Arabidopside G)	2.56654		0.115993
lipid0540	acMGDG(18:4-O/36:8-2O) (Arabidopside G)	2.03968		0.136666
lipid0541	acMGDG(18:4-O/36:6-2O) or acMGDG(18:4-O/38:4)	2.3762		0.076432
lipid0559	acMGDG(18:4-2O/34:6)	2.31504		0.0758462
lipid0560	acMGDG(18:4-2O/34:7-O)	3.00117		0.0604161
lipid0561	acMGDG(18:4-2O/34:8-2O) or acMGDG(18:4-2O/36:6)	4.32507		0.12775
lipid0565	acMGDG(18:4-2O/36:8-2O)	1.60294		0.115294
lipid0586	acMGDG(18:4-3O/34:6)	1.96026		0.080789
lipid0587	acMGDG(18:4-3O/34:7-O)	2.75501		0.0672228
lipid0588	acMGDG(18:4-3O/34:8-2O) or acMGDG(18:4-3O/36:6)	14.7137		0.0856163
lipid0556	acMGDG(18:5-2O/34:8-2O) or acMGDG(18:5-2O/36:6)	5.81371		0.0876302
lipid0558	acMGDG(18:5-2O/36:8-2O)	1.77333		0.139501
lipid0293	acPG(16:1/36:8-2O)	0.155437	x	0.0703819
lipid0283	DAG(16:0/18:3)	0.235879	x	0.0267128
lipid0285	DAG(18:2/18:3)	0.169481	x	0.0272131
lipid0284	DAG(18:3/18:3)	0.144975	x	0.0275323
lipid0632	DGDG(16:0/18:3-O)	0.398828		0.0555158
lipid0395	DGDG(16:0/18:3-2O)	0.627337		0.0542832
lipid0392	DGDG(16:0/18:4-O)	0.134499	x	0.07656
lipid0394	DGDG(18:3-2O/16:3)	0.172156	x	0.0608368
lipid0387	DGDG(18:4-O/16:3)	0.207891	x	0.0663036
lipid0338	DGDG(18:4-O/16:4-O) (Arabidopside C)	1.0309		0.0441389
lipid0396	DGDG(18:4-O/18:3)	0.242341	x	0.0559381
lipid0398	DGDG(18:4-O/18:4-O) (Arabidopside D)	0.137929	x	0.0697621
lipid0402	DGDG(18:4-O/18:4-2O) or DGDG(18:4-O/20:2)	0.177204	x	0.0580356
lipid0164	DGDG(34:3)	641.864		0.018864
lipid0163	DGDG(34:4)	33.9029		0.0273428
lipid0162	DGDG(34:5)	70.3091		0.0252248
lipid0161	DGDG(34:6)	315.512		0.0235364
lipid0170	DGDG(36:3)	48.6889		0.0228398
lipid0169	DGDG(36:4)	92.2522		0.0245215
lipid0168	DGDG(36:5)	220.049		0.0225062
lipid0167	DGDG(36:6)	3540.29		0.0222065
lipid0175	DGDG(36:6-2O) or DGDG(38:4)	4.09339		0.0390578
lipid0174	DGDG(36:7-2O) or DGDG(38:5)	10.1448		0.0354479
lipid0173	DGDG(36:8-2O) or DGDG(38:6)	30.4615		0.0274109
lipid0157	DGMG(16:0)	2.78488		0.149503
lipid0158	DGMG(16:4-O)	1.39835		0.0883055
lipid0159	DGMG(18:3)	10.7961		0.0300382
lipid0160	DGMG(18:4-O)	1.59733		0.0708835
lipid0210	GIPC(42:1)-3	5.32801		0.100099
lipid0212	GIPC(42:2)-3	3.93324		0.115551
lipid0226	GlcCer(34:1)-2	269.589		0.0283616
lipid0227	GlcCer(34:1)-3	314.561		0.0275398
lipid0233	GlcCer(40:1)-3	209.726		0.033573
lipid0237	GlcCer(42:2)-3	1147.83		0.0298377
lipid0799	LPA(16:0)	13.0677		0.0995658
lipid0025	LPC(16:0)	1.05004		0.0186752
lipid0028	LPC(18:1)	0.468031		0.0256409
lipid0027	LPC(18:2)	2.26615		0.0111779
lipid0026	LPC(18:3)	2.29053		0.0127265
lipid0052	LPE(16:0)	2.26458		0.0275737
lipid0055	LPE(18:1)	0.66923		0.224671	x
lipid0054	LPE(18:2)	2.64364		0.0241121
lipid0053	LPE(18:3)	1.75926		0.0347216
lipid0793	LPI(18:3)	1.80448		0.030573
lipid0834	MGDG(16:3/9:1-2O)	0.41008		0.203555	x
lipid0323	MGDG(18:3/16:4-O)	0.556638		0.0660708
lipid0837	MGDG(18:3/7:1-O)	0.30278		0.050762
lipid0625	MGDG(18:3-O/16:4-O)	0.385103		0.0583144
lipid0370	MGDG(18:3-2O/16:3)	0.490162		0.060463
lipid0374	MGDG(18:3-2O/16:4-O) (18:4-O as fragment)	0.280109		0.105485
lipid0330	MGDG(18:3-2O/16:4-O) or MGDG(20:1/16:4-O) (16:4-O as fragment)	0.110349	x	0.134487
lipid0383	MGDG(18:3-2O/18:3-O)	0.21533	x	0.0680254
lipid0358	MGDG(18:4-O/16:3)	3.1888		0.0264608
lipid0362	MGDG(18:4-O/16:3-O)	0.685588		0.0649831
lipid0325	MGDG(18:4-O/16:4-O) (16:4-O as fragment; Arabidopside A)	0.185481	x	0.0938298
lipid0361	MGDG(18:4-O/16:4-O) (18:4-O as fragment; Arabidopside A)	1.36688		0.0367776
lipid0366	MGDG(18:4-O/18:1) or MGDG(18:4-O/16:3-2O)	0.254396		0.0682401
lipid0373	MGDG(18:4-O/18:2)	0.337208		0.0582316
lipid0372	MGDG(18:4-O/18:3)	0.292295		0.125117
lipid0376	MGDG(18:4-O/18:3-O)	0.41962		0.0426307
lipid0382	MGDG(18:4-O/18:3-2O) or MGDG(18:4-O/20:3)	0.219794	x	0.0767925
lipid0385	MGDG(18:4-O/18:3-3O)	0.157369	x	0.0818272
lipid0386	MGDG(18:4-O/18:3-4O)	0.163204	x	0.0809265
lipid0375	MGDG(18:4-O/18:4-O) (Arabidopside B)	0.219087	x	0.0984797
lipid0381	MGDG(18:4-O/18:4-2O)	0.163652	x	0.0800678
lipid0384	MGDG(18:4-O/18:4-3O) or MGDG(18:4-O/19:3-2O)	0.148859	x	0.0651799
lipid0329	MGDG(18:4-2O/16:4-O) or MGDG(20:2/16:4-O)	0.0922471	x	0.112039
lipid0328	MGDG(18:5-2O/16:4-O) or MGDG(20:3/16:4-O)	0.122708	x	0.116398
lipid0380	MGDG(18:5-2O/18:4-O) or MGDG(20:3/18:4-O)	0.300049		0.0592431
lipid0138	MGDG(30:6-O)	4.94755		0.105291
lipid0143	MGDG(34:3)	406.806		0.0257976
lipid0142	MGDG(34:4)	799.013		0.0242442
lipid0141	MGDG(34:5)	1782.61		0.0270484
lipid0140	MGDG(34:6)	28555.8		0.0256106
lipid0808	MGDG(35:3)	10.5725		0.0658726
lipid0149	MGDG(36:3)	59.0533		0.0355865
lipid0148	MGDG(36:4) or MGDG(34:6-2O)	425.598		0.0302004
lipid0147	MGDG(36:5) or MGDG(34:7-2O)	1487.01		0.0257857
lipid0146	MGDG(36:6) or MGDG(34:8-2O)	10239		0.0245869
lipid0154	MGDG(36:6-2O) or MGDG(38:4)	15.0337		0.0501663
lipid0152	MGDG(36:8-2O) or MGDG(38:6)	24.815		0.0426605
lipid0153	MGDG(36:7-2O) or MGDG(38:5)	17.3666		0.0394521
lipid0133	MGMG(16:0)	15.1609		0.0989851
lipid0132	MGMG(16:3)	24.0192		0.0655621
lipid0135	MGMG(18:3)	23.7794		0.0523744
lipid0136	MGMG(18:4-O)	15.7821		0.0747046
lipid0273	NAE(16:0)	0.024901	x	0.363755	x
lipid1064	NAPE(18:3/34:3)	0.701818		0.0496572
lipid1065	NAPE(18:3/36:6)	0.148218	x	0.0539846
lipid0126	PA(34:1)	1.07342		0.0902935
lipid0125	PA(34:2)	2.78842		0.113705
lipid0124	PA(34:3)	2.18964		0.138999
lipid0123	PA(34:4)	0.337093		0.218542	x
lipid0121	PA(34:6)	0.129769	x	0.317239	x
lipid0131	PA(36:2)	0.299379		0.148963
lipid0130	PA(36:3)	0.652543		0.123282
lipid0129	PA(36:4)	1.45066		0.119451
lipid0128	PA(36:5)	1.52536		0.128511
lipid0127	PA(36:6)	0.670527		0.159467
lipid0624	PC(16:0/18:3-O)	1.19963		0.0422539
lipid0371	PC(16:0/18:3-2O)	0.930687		0.0569583
lipid0628	PC(18:2/18:3-O)	0.649159		0.0533766
lipid0379	PC(18:2/18:3-2O)	0.529596		0.0321591
lipid0627	PC(18:3/18:3-O)	0.850125		0.064014
lipid0378	PC(18:3/18:3-2O)	0.499016		0.0340101
lipid0030	PC(32:0)	0.676189		0.0139924
lipid0841	PC(32:1)	2.40376		0.00942064
lipid0840	PC(32:3)	3.0556		0.00539159
lipid0035	PC(34:1)	32.7124		0.00588948
lipid0034	PC(34:2)	181.171		0.00644955
lipid0033	PC(34:3)	201.018		0.00739404
lipid0032	PC(34:4)	6.06357		0.00550962
lipid0842	PC(34:6)	2.51584		0.00709792
lipid0040	PC(36:2)	27.5101		0.00357712
lipid0039	PC(36:3)	70.9967		0.00406307
lipid0038	PC(36:4)	166.213		0.00488592
lipid0037	PC(36:5)	206.492		0.00696825
lipid0036	PC(36:6)	110.961		0.00513515
lipid0046	PC(38:2)	2.6364		0.015829
lipid0045	PC(38:3)	3.98336		0.00567568
lipid0044	PC(38:4)	3.97737		0.00594996
lipid0043	PC(38:5)	2.40075		0.00707676
lipid0042	PC(38:6)	0.971147		0.00853914
lipid0050	PC(40:2)	0.376754		0.0315028
lipid0049	PC(40:3)	0.576055		0.0472544
lipid0048	PC(40:4)	0.575967		0.0566177
lipid0047	PC(40:5)	0.336035		0.0552079
lipid0618	PE(16:0/18:3-O)	1.16222		0.0296312
lipid0355	PE(16:0/18:3-2O)	0.782571		0.0553667
lipid0413	PE(16:0/18:3-3O)	1.89691		0.0403395
lipid0620	PE(18:2/18:3-O)	0.953883		0.0354944
lipid0360	PE(18:2/18:3-2O)	0.540446		0.044133
lipid0415	PE(18:2/18:3-3O)	1.97225		0.034758
lipid0427	PE(16:0/18:2-O)	0.924036		0.052707
lipid0619	PE(18:3/18:3-O)	0.730976		0.0522834
lipid0359	PE(18:3/18:3-2O)	0.490368		0.0443745
lipid0414	PE(18:3/18:3-3O)	1.18726		0.0355114
lipid0060	PE(32:0)	1.01769		0.0373656
lipid0059	PE(32:1)	2.63037		0.0230182
lipid0057	PE(32:3)	4.40332		0.019033
lipid0063	PE(34:2)	452.852		0.0180412
lipid0062	PE(34:3)	319.819		0.0168367
lipid0061	PE(34:4)	4.68608		0.0228046
lipid0069	PE(36:2)	29.2932		0.0220712
lipid0068	PE(36:3)	63.0101		0.0206605
lipid0067	PE(36:4)	216.4		0.0185505
lipid0066	PE(36:5)	235.414		0.0175792
lipid0065	PE(36:6)	78.2045		0.0174715
lipid0807	PE(38:2)	5.17603		0.0199415
lipid0074	PE(38:3)	5.32675		0.020958
lipid0073	PE(38:4)	5.24813		0.0259337
lipid0072	PE(38:5)	4.87976		0.0267829
lipid0076	PE(40:2)	10.173		0.0236869
lipid0075	PE(40:3)	4.99439		0.0243519
lipid0079	PE(42:2)	12.5555		0.0238799
lipid1003	PE(42:3) (measured in negative mode)	3.17454		0.0352027
lipid0078	PE(42:3) (measured in positive mode)	14.3893		0.0294547
lipid0353	PG(18:2/16:0-O)	1.3369		0.0432659
lipid0431	PG(18:2-O/16:1)	0.627393		0.0590507
lipid0622	PG(18:3-O/16:0)	1.30058		0.0351024
lipid0621	PG(18:3-O/16:1)	1.29792		0.0528875
lipid0357	PG(18:4-O/16:0)	0.349345		0.0586629
lipid0356	PG(18:4-O/16:1)	0.545017		0.0746075
lipid0364	PG(18:4-O/18:2)	0.284253		0.0704396
lipid0363	PG(18:4-O/18:3)	0.452011		0.069097
lipid0008	PG(32:0)	24.8082		0.049512
lipid0007	PG(32:1)	21.48		0.0242911
lipid0012	PG(34:1)	98.5354		0.0199536
lipid0011	PG(34:2)	179.76		0.0187181
lipid0010	PG(34:3)	371.139		0.0167662
lipid0009	PG(34:4)	562.049		0.0158308
lipid0018	PG(36:2)	3.13933		0.101335
lipid0017	PG(36:3)	4.67449		0.0467042
lipid0016	PG(36:4)	6.55497		0.0365478
lipid0015	PG(36:5)	6.24465		0.0358095
lipid0014	PG(36:6)	7.97018		0.0333998
lipid0086	PI(34:2)	170.339		0.0206764
lipid1001	PI(34:3) (measured in negative mode)	86.5751		0.0228536
lipid0085	PI(34:3) (measured in positive mode)	196.11		0.0230813
lipid0095	PS(34:3)	5.15784		0.0532605
lipid0116	PS(42:2)	6.00762		0.0544055
lipid0115	PS(42:3)	7.74649		0.0536079
lipid0248	Campesterol-Glc	37.5106		0.0393219
lipid0255	Campesterol-Glc(16:0)	100.05		0.0353645
lipid0261	Campesterol-Glc(18:2)	56.7121		0.0418867
lipid0258	Campesterol-Glc(18:3)	54.008		0.0454043
lipid0816	Campesterol-Glc(18:4-O)	3.72299		0.111951
lipid0821	Sitosterol(18:2)	0.219804	x	0.0296819
lipid0289	Sitosterol(18:3)	0.288304		0.025853
lipid0250	Sitosterol-Glc	243.808		0.0329824
lipid0257	Sitosterol-Glc(16:0)	503.624		0.0316826
lipid0263	Sitosterol-Glc(18:2)	292.678		0.0365076
lipid0260	Sitosterol-Glc(18:3)	272.418		0.0370942
lipid0818	Sitosterol-Glc(18:4-O)	3.89703		0.0822112
lipid0249	Stigmasterol-Glc	30.0019		0.0450838
lipid0256	Stigmasterol-Glc(16:0)	50.3242		0.033199
lipid0262	Stigmasterol-Glc(18:2)	29.0751		0.0360742
lipid0259	Stigmasterol-Glc(18:3)	29.6963		0.0421558
lipid0817	Stigmasterol-Glc(18:4-O)	1.8321		0.0952427
lipid0182	SQDG(32:0)	1.83483		0.032094
lipid0186	SQDG(34:3)	51.8894		0.0236657
lipid1061	SQDG(34:4-O)	1.85187		0.0440155
lipid0189	SQDG(36:6)	14.0164		0.0251753
lipid1063	SQDG(36:8-2O)	1.85979		0.0867733
lipid1060	TAG(16:0/34:6)	0.0543315	x	0.0297542
lipid0280	TAG(18:2/36:5)	4.32038		0.00772749
lipid0276	TAG(18:3/34:2)	1.52438		0.00834568
lipid1062	TAG(18:3/34:6)	0.305399		0.0228907
lipid0278	TAG(18:3/36:5)	6.51715		0.00887272
lipid0277	TAG(18:3/36:6)	5.31319		0.00856451
lipid0305	TeGDG(34:6)	0.969608		0.0881542
lipid0309	TeGDG(36:6)	4.93137		0.151462
lipid0294	TrGDG(34:6)	4.32527		0.093341
lipid0298	TrGDG(36:6)	28.0408		0.21512	x

## Sheet: Table S4
Table S4. Lipid amounts (normalized intensity per mg of leaf dry mass, where a signal of 1 corresponds to the same amount of signal as derived from 1 pmol of internal standard(s)). Data from 18 biological replicates of each treatment are shown for wild-type Col-0 plants, and data from 9 replicates are shown for the opr3 mutant. Tray numbers and the associated treatments are indicated in columns B…
"x" indicates the lipid did not meet LOD criterion of > 0.25 normalized intensity units
"x" indicates the lipid did not meet CoV standard of < 0.20
Lipid number					lipid0599	lipid0600	lipid0601	lipid0603	lipid0473	lipid0474	lipid0476	lipid0483	lipid0468	lipid0448	lipid0454	lipid0498	lipid0500	lipid0519	lipid0522	lipid0525	lipid0489	lipid0495	lipid0526	lipid0528	lipid0514	lipid0515	lipid0516	lipid0518	lipid0551	lipid0553	lipid0596	lipid0501	lipid0506	lipid0503	lipid0505	lipid0508	lipid0512	lipid0542	lipid0543	lipid0544	lipid0546	lipid0545	lipid0548	lipid0566	lipid0570	lipid0580	lipid0591	lipid0592	lipid0595
Sample name ("H" for "heat"+Block number.Tray number.Well number in tray)	Tray number	Treatment	Path(s)	Genotype	acDGDG(18:4-O/34:6)	acDGDG(18:4-O/34:7-O)	acDGDG(18:4-O/34:8-2O) or acDGDG(18:4-O/36:6)	acDGDG(18:4-O/36:8-2O)	acMGDG(16:0/34:6)	acMGDG(16:0/34:7-O)	acMGDG(16:0/34:8-2O) or acMGDG(16:0/36:6)	acMGDG(16:0/36:8-2O)	acMGDG(16:1/34:8-2O) or acMGDG(16:1/36:6)	acMGDG(16:3/34:6)	acMGDG(16:3/34:8-2O) or acMGDG(16:3/36:6)	acMGDG(16:3-O/34:8-2O) or acMGDG(16:3-O/36:6)	acMGDG(16:3-O/36:8-2O)	acMGDG(16:3-2O/34:6) or acMGDG(18:1/34:6)	acMGDG(16:3-2O/34:8-2O) or acMGDG(16:3-2O/36:6) or acMGDG(18:1/34:8-2O) or acMGDG(18:1/36:6)	acMGDG(16:3-2O/36:8-2O) or acMGDG(18:1/36:8-2O)	acMGDG(16:4-O/34:8-2O) or acMGDG(16:4-O/36:6)	acMGDG(16:4-O/36:8-2O)	acMGDG(18:0/34:6)	acMGDG(18:0/34:8-2O) or acMGDG(18:0/36:6)	acMGDG(18:2/34:6)	acMGDG(18:2/34:7-O)	acMGDG(18:2/34:8-2O) or acMGDG(18:2/36:6)	acMGDG(18:2/36:8-2O)	acMGDG(18:2-O/34:8-2O) or acMGDG(18:2-O/36:6)	acMGDG(18:2-O/36:8-2O)	acMGDG(18:2-3O/34:8-2O) or acMGDG(18:2-3O/36:6)	acMGDG(18:3/34:6)	acMGDG(18:3/34:7-2O) or acMGDG(18:3/36:5)	acMGDG(18:3/34:7-O)	acMGDG(18:3/34:8-2O) or acMGDG(18:3/36:6)	acMGDG(18:3/36:7-O)	acMGDG(18:3/36:8-2O)	acMGDG(18:3-O/34:6)	acMGDG(18:3-O/34:7-O)	acMGDG(18:3-O/34:8-2O) or acMGDG(18:3-O/36:6)	acMGDG(18:3-O/36:6-O)	acMGDG(18:3-O/36:7-O)	acMGDG(18:3-O/36:8-2O)	acMGDG(18:3-2O/34:6)	acMGDG(18:3-2O/34:8-2O) or acMGDG(18:3-2O/36:6)	acMGDG(18:3-2O/36:8-2O)	acMGDG(18:3-3O/34:6)	acMGDG(18:3-3O/34:7-O)	acMGDG(18:3-3O/36:8-2O)
H1.01.09	1	21° C	1, 2, and 3	WT	66.0017	49.3261	472.926	25.2685	184.142	252.422	264.53	84.3464	346.936	108.975	384.062	232.762	95.4147	158.138	401.279	94.6244	388.253	61.3881	126.491	199.981	129.325	118.71	368.361	123.738	329.287	100.005	590.785	162.167	259.781	111.195	239.151	143.575	104.117	94.4293	120.24	206.481	154.315	158.432	54.2959	201.425	2063.88	71.771	50.1141	79.3797	58.0089
H1.01.22	1	21° C	1, 2, and 3	WT	63.1161	45.1242	385.775	25.8169	172.375	207.728	309.931	77.3951	314.435	90.3135	367.182	278.37	68.2543	153.814	360.187	76.3336	387.172	68.7122	132.802	190.287	144.163	108.226	346.622	103.766	361.587	91.1561	533.413	154.007	276.919	97.3886	260.459	137.8	103.243	102.05	109.093	184.078	147.094	163.537	54.9747	150.056	1480.64	58.6993	56.4014	66.6187	53.5676
H1.01.23	1	21° C	1, 2, and 3	WT	71.0895	45.0916	399.904	26.1148	147.472	191.146	204.28	74.0495	308.785	69.7072	307.54	223.196	72.7792	138.531	323.763	86.4502	383.765	63.7687	127.777	173.037	134.698	92.6331	310.031	83.1537	282.84	101.144	480.918	118.542	245.979	65.6821	204.429	110.558	90.2618	89.9102	82.5869	200.643	118.809	111.236	48.9817	140.722	1883.8	66.6317	45.4569	64.0124	52.9829
H1.01.28	1	21° C	1, 2, and 3	WT	47.4111	37.7522	281.545	19.6083	143.138	168.422	238.622	45.2416	224.657	66.5291	268.296	153.625	60.0606	127.155	298.654	64.8368	372.88	55.9602	100.282	172.51	88.9281	90.9297	324.961	108.601	252.285	83.7889	494.419	109.276	245.587	61.3683	178.483	97.0842	83.7392	108.726	89.9056	163.666	120.927	129.075	36.3938	133.474	1735.61	61.2675	43.0927	52.6672	41.5453
H1.01.54	1	21° C	1, 2, and 3	WT	64.956	38.3129	414.545	19.9863	152.036	197.208	232.502	61.4526	285.013	83.548	305.285	207.89	67.1308	143.319	386.206	67.7791	400.561	59.4352	134.808	145.416	112.787	93.0608	327.228	103.308	292.664	98.1019	590.531	129.238	254.531	76.9546	222.959	108.518	86.6212	100.3	88.7083	223.44	149.604	115.249	57.8184	122.449	1655.39	62.0661	51.1295	61.9616	53.4116
H1.01.71	1	21° C	1, 2, and 3	WT	57.4074	44.9081	428.214	21.4795	187.594	228.599	276.868	77.2816	318.632	83.0072	359.719	243.011	74.9461	177.83	350.706	94.2275	367.609	68.7817	137.741	199.411	146.614	105.247	350.046	127.705	429.022	111.529	633.19	133.731	236.126	81.4	188.209	149.087	107.493	92.7213	97.0653	224.897	170.526	157.762	49.8261	96.9593	1563.44	72.2016	66.2847	79.9231	48.1666
H2.01.08	1	21° C	1, 2, and 3	WT	118.655	57.8089	635.879	34.567	211.486	325.439	525.772	141.638	460.966	104.013	472.979	323.186	128.344	199.523	539.644	134.383	478.587	99.1789	206.293	264.885	143.595	135.627	462.561	164.053	380.124	149.755	1319.78	174.147	395.837	128.301	324.125	130.562	138.174	133.489	136.549	257.027	179.803	184.969	85.0826	107.488	1877.59	96.1665	68.4266	107.93	85.087
H2.01.14	1	21° C	1, 2, and 3	WT	107.602	64.1435	477.478	34.1916	191.165	222.971	446.817	103.08	401.485	92.9738	444.189	332.616	123.448	174.534	530.452	139.051	633.546	119.14	163.117	198.257	164.967	150.288	449.933	170.652	388.998	152.842	1109.48	201.342	517.03	139.261	314.162	163.312	157.773	186.465	117.981	231.251	219.203	187.044	43.9388	128.944	1794.3	93.8486	68.2859	99.6212	89.6904
H2.01.24	1	21° C	1, 2, and 3	WT	NA	NA	NA	NA	NA	NA	NA	NA	NA	NA	NA	NA	NA	NA	NA	NA	NA	NA	NA	NA	NA	NA	NA	NA	NA	NA	NA	NA	NA	NA	NA	NA	NA	NA	NA	NA	NA	NA	NA	NA	NA	NA	NA	NA	NA
H2.01.51	1	21° C	1, 2, and 3	WT	88.808	54.2751	655.232	27.8272	191.546	218.799	500.382	80.2915	403.797	85.3015	486.851	347.635	129.235	167.312	497.667	103.974	531.193	63.5805	157.212	234.413	138.445	128.945	401.268	179.4	418.869	139.193	1199.62	148.887	437.742	125.228	296.646	162.053	146.366	118.704	111.85	254.538	212.645	171.964	59.5358	95.78	1784.89	86.0325	69.7214	92.2996	85.932
H2.01.53	1	21° C	1, 2, and 3	WT	105.897	64.2679	494.987	32.7872	183.504	230.453	435.713	108.353	420.12	93.7254	507.118	316.974	143.963	188.689	521.588	130.695	521.205	90.4708	161.403	223.388	147.599	142.902	428.478	200.022	455.5	152.103	1112.61	185.469	507.726	126.799	303.816	166.393	214.981	138.873	121.098	252.088	242.007	263.648	65.9196	115.936	1993.68	96.783	71.1349	94.9262	92.3651
H2.01.71	1	21° C	1, 2, and 3	WT	118.509	61.0712	515.923	35.1081	216.949	238.363	557.966	128.344	444.332	99.1551	509.535	353.593	129.658	210.483	582.123	147.851	629.776	102.28	203.78	242.199	159.243	145.84	426.065	146.409	513.44	158.868	1080.11	198.22	487.113	137.147	263.591	192.914	149.261	131.781	133.574	264.907	214.395	190.542	68.3665	134.386	2176.04	87.8046	81.6143	97.774	80.5332
H3.01.01	1	21° C	1, 2, and 3	WT	56.4465	30.5112	683.346	22.1401	114.376	106.15	218.453	59.6867	226.337	52.7906	264.94	182.836	62.9245	100.78	442.012	62.8636	348.862	49.7495	106.594	218.988	80.5158	85.2576	256.612	100.368	238.112	79.4195	518.576	101.219	297.697	73.7053	137.431	90.257	104.918	102.152	67.8279	201.327	141.481	117.698	37.9671	68.0099	746.355	48.0686	46.1639	59.1311	46.9456
H3.01.05	1	21° C	1, 2, and 3	WT	50.7005	31.7724	330.868	21.2417	112.71	100.749	226.893	52.661	216.246	53.9656	250.023	174.762	78.5141	99.4513	438.064	69.5362	463.84	47.4549	85.5389	170.205	83.2812	89.7653	276.487	137.815	278.301	83.0431	472.235	111.63	328.165	66.3291	174.022	97.2276	153.044	149.884	69.0212	184.874	161.221	203.787	39.5638	70.4284	703.863	56.6943	44.2373	56.4728	49.2091
H3.01.28	1	21° C	1, 2, and 3	WT	40.9246	30.4655	326.144	19.1521	88.2161	89.4998	233.202	41.3398	216.637	51.6367	245.527	175.619	52.348	89.9853	434.449	46.0542	555.061	45.3452	69.4521	147.332	85.0307	85.8079	301.901	100.531	278.987	74.437	528.502	111.237	330.92	68.9691	171.619	90.5831	107.141	158.149	63.7444	184.498	138.184	132.637	43.8871	53.5457	713.354	49.6268	42.1831	49.7098	46.5879
H3.01.29	1	21° C	1, 2, and 3	WT	40.5684	28.901	270.551	17.1554	103.766	88.1052	237.847	47.8241	227.942	50.567	246.428	188.609	51.1267	95.0122	491.739	53.3193	823.221	53.9971	72.9012	137.164	85.4672	81.992	365.423	62.9416	302.419	80.8491	628.547	117.705	425.29	73.738	233.338	70.3715	73.9074	212.239	71.2201	198.625	137.321	95.0815	34.8167	67.8291	744.9	60.694	44.5272	53.5442	51.8214
H3.01.34	1	21° C	1, 2, and 3	WT	48.7017	31.4641	326.083	15.7261	98.7933	93.7124	220.791	45.2169	228.407	52.6208	256.403	179.023	49.487	91.999	485.534	51.3272	642.698	43.5796	60.1718	148.29	76.2639	86.4501	339.877	60.703	284.155	68.9601	708.912	104.061	359.588	73.4107	199.981	72.5899	67.6201	153.371	71.7902	198.047	129.871	75.3164	39.4839	60.221	847.186	42.7534	45.3732	55.7257	53.1269
H3.01.45	1	21° C	1, 2, and 3	WT	53.3729	32.0357	322.902	20.6955	98.8153	99.9625	273.061	58.6128	281.101	59.051	301.499	191.28	58.2222	80.2158	441.873	57.4497	657.352	46.5572	83.2573	174.828	86.8538	93.2237	351.025	100.319	346.905	80.6653	658.694	104.765	396.112	72.97	183.366	70.5066	90.9302	166.418	72.7047	222.543	149.722	120.958	39.8716	67.3236	895.913	47.9933	46.2576	55.1149	60.808
H1.02.09	2	1 h at 21°C	1 and 3	WT	62.4528	34.9175	279.821	19.7801	123.408	184.998	223.37	99.4921	218.72	92.5555	229.725	121.019	68.4622	111.064	244.289	56.6521	212.61	37.4822	112.385	136.23	76.5994	109.272	241.861	68.8676	196.062	66.1296	431.2	100.825	132.821	72.6968	126.278	76.3205	65.2586	74.6282	69.4401	146.668	108.589	101.327	56.6154	91.2111	991.732	41.9463	31.3251	50.1433	41.9606
H1.02.22	2	1 h at 21°C	1 and 3	WT	66.2011	35.9929	354.27	19.8257	115.731	177.059	209.091	60.897	260.298	76.8555	242.988	104.418	51.5034	93.8972	279.377	60.5022	287.346	37.6579	89.8173	129.031	104.073	97.9024	298.631	73.7875	216.891	63.9632	506.983	122.604	198.024	59.0494	152.765	67.4064	57.092	92.2045	68.5574	225.304	90.8125	82.3815	45.2637	73.2223	1018.76	43.7398	36.2115	57.2822	35.5441
H1.02.23	2	1 h at 21°C	1 and 3	WT	58.5347	30.6484	249.229	20.0082	92.1846	160.708	237.413	54.8497	185.592	95.9734	206.384	78.2747	38.3987	74.4316	223.036	35.8677	206.688	34.1886	72.7814	110.177	78.0412	100.308	226.421	56.124	173.834	49.9946	447.815	111.163	204.301	55.606	169.594	60.6673	50.7045	75.4685	68.8884	153.575	88.3523	62.2694	27.4054	66.093	702.69	38.9966	33.5392	47.2785	38.517
H1.02.28	2	1 h at 21°C	1 and 3	WT	49.6245	27.268	182.984	12.2119	84.0414	125.101	165.889	55.551	160.581	91.4223	156.975	57.7582	32.6399	47.5268	174.326	37.5777	129.955	49.8054	64.5838	97.315	80.7759	93.2311	178.943	51.5771	125.03	45.4527	309.014	73.6891	142.354	72.2851	102.393	52.5111	44.0073	47.1462	49.3148	143.05	67.0298	50.8156	28.868	59.4341	689.469	22.4816	27.0105	39.2226	24.4518
H1.02.54	2	1 h at 21°C	1 and 3	WT	80.9224	39.1792	282.39	20.0275	122.104	173.297	259.198	56.4662	200.218	130.945	237.23	127.794	46.8211	75.3528	332.032	46.7812	199.039	56.6948	105.694	134.588	88.2322	150.924	277.012	61.1616	203.595	56.7477	403.953	103.366	231.818	83.8418	187.952	82.6656	75.1268	83.7321	77.1634	220.804	102.944	71.1022	52.9698	79.5717	1095.75	32.3543	34.3455	49.8095	39.4534
H1.02.71	2	1 h at 21°C	1 and 3	WT	63.8651	35.9564	270.55	15.0529	101.544	143.045	217.615	37.582	201.632	74.0834	196.92	95.9628	46.2553	82.4274	288.899	46.3911	172.189	17.721	85.611	125.479	74.9576	86.5177	236.554	41.9696	156.358	53.779	400.951	77.8663	169.403	52.7085	147.306	66.5205	54.7266	47.8608	53.0177	202	92.7032	80.3524	31.7065	70.9832	1050.24	21.8466	37.013	42.835	31.9302
H2.02.08	2	1 h at 21°C	1 and 3	WT	104.558	64.3495	897.767	36.1815	223.479	278.626	424.259	153.692	352.814	101.166	440.887	270.22	132.599	202.507	469.961	122.734	361.651	106.192	184.393	225.651	179.382	150.623	346.711	201.173	317.792	144.722	1097.62	161.717	346.196	113.414	270.621	177.487	219.934	124.645	114.047	178.232	196.22	287.158	75.1936	116.689	2301.41	96.856	62.7986	103.904	92.3468
H2.02.14	2	1 h at 21°C	1 and 3	WT	103.207	58.9368	738.437	33.9856	199.233	266.786	473.694	111.979	381.164	91.4517	504.758	223.242	126.386	194.351	474.753	127.661	447.351	82.8579	160.527	213.463	166.761	148.715	428.849	308.383	352.033	140.648	1171.37	206.708	445.592	163.175	289.835	204.843	338.299	182.303	115.29	240.082	250.847	478.468	76.7797	111.798	2230.48	88.5469	65.7891	102.976	92.2882
H2.02.24	2	1 h at 21°C	1 and 3	WT	96.7237	66.9345	684.571	32.1089	212.822	254.611	511.616	108.605	372.534	95.8354	480.488	215.285	127.354	219.269	512.85	128.372	409.745	130.602	194.707	152.817	171.785	157.063	400.254	148.402	413.536	143.784	1292.5	187.403	389.902	160.795	245.548	166.118	144.702	121.448	111.684	215.122	170.526	190.847	81.6976	139.156	2326.12	78.5453	64.5585	106.7	90.6032
H2.02.51	2	1 h at 21°C	1 and 3	WT	78.2036	49.5919	448.114	36.0799	204.129	213.203	450.423	109.209	360.891	89.6977	462.265	218.681	105.246	181.166	418.686	118.562	419.739	87.3114	140.079	197.006	159.597	138.551	385.089	101.031	428.832	138.752	1006.92	197.889	411.387	130.458	237.816	145.149	134.242	128.287	120.874	187.896	168.608	154.653	78.1994	108.182	1740.97	86.9482	81.871	101.315	79.3781
H2.02.53	2	1 h at 21°C	1 and 3	WT	87.2637	56.4493	409.943	34.1044	194.218	213.622	417.566	91.3043	318.756	98.5705	459.957	247.021	99.5391	230.869	493.244	116.164	400.603	74.1129	138.428	168.673	137.675	135.703	342.605	105.356	490.452	138.257	1049.67	206.139	409.184	124.132	241.844	153.767	126.375	123.825	107.765	207.935	228.172	150.628	72.2993	117.451	2084.87	91.8338	66.9215	110.011	79.5629
H2.02.71	2	1 h at 21°C	1 and 3	WT	87.1968	51.7559	419.789	31.7489	184.04	241.763	410.057	115.493	411.407	106.551	513.493	263.867	110.007	191.277	461.968	103.568	313.137	106.014	144.322	161.583	160.262	144.938	347.066	110.043	517.039	134.972	1029.35	213.405	432.221	119.291	300.688	140.339	120.444	128.328	122.662	218.22	223.175	169.627	76.6719	137.96	2367.46	59.0126	76.3037	95.6181	64.362
H3.02.01	2	1 h at 21°C	1 and 3	WT	63.7312	35.1352	389.211	44.7209	110.833	112.581	889.534	142.914	308.903	73.9555	316.704	223.493	56.6608	95.7026	525.727	68.179	572.24	69.2269	234.55	213.166	75.8679	87.6622	343.661	69.2751	352.569	93.235	718.038	128.248	329.697	64.2615	181.156	66.5347	92.4335	115.36	73.2997	353.038	159.856	116.531	49.9244	99.5952	923.573	78.7955	50.9086	57.1117	50.6914
H3.02.05	2	1 h at 21°C	1 and 3	WT	55.9873	34.9679	344.402	19.6448	96.5478	93.2462	312.063	54.0934	263.697	53.3042	275.266	210.816	50.0311	94.8374	495.58	58.9753	728.704	46.8168	85.2519	180.563	76.1043	85.673	339.056	73.7177	355.798	67.3344	562.743	112.232	364.336	53.1492	214.967	62.3517	81.9547	168.977	74.4955	267.172	114.972	88.7652	46.1074	73.3013	935.968	49.4432	44.3479	50.8329	48.0184
H3.02.28	2	1 h at 21°C	1 and 3	WT	53.1464	32.0921	288.758	19.1217	101.763	90.0576	251.537	54.2902	232.573	51.6898	248.906	188.369	48.513	81.6267	438.01	50.8553	671.897	43.5215	77.7618	181.116	85.338	81.8034	361.05	158.291	300.459	75.6646	516.213	102.847	364.163	66.1784	198.957	78.6077	141.58	200.64	78.8494	232.579	153.066	221.443	48.8672	60.8946	767.073	48.9059	41.6377	53.4271	58.8895
H3.02.29	2	1 h at 21°C	1 and 3	WT	55.2906	33.4593	301.999	19.803	109.882	98.7082	213.882	54.871	216.512	58.958	228.482	216.723	55.252	97.6707	396.961	62.4852	458.615	55.3308	74.1621	145.356	97.5851	78.3557	291.222	83.2514	315.74	78.0556	465.591	109.787	344.564	81.1695	147.255	80.5973	89.0769	144.68	65.5858	204.528	126.42	119.951	38.8681	59.853	768.118	49.1271	43.4312	57.0869	57.7262
H3.02.34	2	1 h at 21°C	1 and 3	WT	58.1814	34.6156	256.482	37.5013	114.893	97.8088	513.898	88.8328	241.455	67.2941	259.979	191.32	49.6217	97.7557	521.578	65.2724	409.271	50.2583	141.405	174.956	90.7224	80.6537	278.853	75.4999	304.524	77.0745	452.711	118.661	300.468	62.4726	254.175	75.7371	108.058	107.488	59.6769	265.113	136.434	116.979	41.2445	89.5325	1052.83	63.6629	39.3277	55.8439	49.5796
H3.02.45	2	1 h at 21°C	1 and 3	WT	42.4816	28.1591	263.579	15.8366	108.985	92.0274	218.403	42.7508	231.869	53.7451	259.824	198.861	58.1303	86.7764	428.567	61.9056	420.355	46.7739	72.2881	143.088	85.257	88.3046	291.284	92.7283	325.681	91.3425	492.912	108.272	308.234	64.4012	148.25	80.607	97.1133	121.612	65.4166	197.742	146.357	136.647	36.5084	58.5372	633.07	45.8316	43.3357	56.0853	56.193
H1.03.09	3	1 h at 38°C	2	WT	47.9168	36.4476	426.894	15.2568	176.837	177.207	276.128	82.8775	281.172	79.9193	253.638	162.566	64.1352	156.342	378.618	82.4606	288.208	51.7362	128.146	149.38	107.518	109.955	297.053	82.5987	220.692	91.9023	513.761	119.935	194.287	83.1354	168.462	112.966	84.7423	71.3474	71.4756	197.459	106.959	120.487	40.5475	69.3667	1008.2	52.5691	39.5889	69.4082	44.4936
H1.03.22	3	1 h at 38°C	2	WT	48.1978	38.4285	452.38	26.9949	187.988	200.01	275.565	96.6801	247.198	83.4115	269.696	163.034	84.0078	142.665	356.446	103.004	223.652	61.648	160.455	111.304	115.673	110.498	228.034	66.2436	192.882	102.761	439.459	134.988	152.35	96.9687	166.583	133.051	90.0724	70.9721	98.5636	123.837	102.833	121.893	36.1607	76.0382	800.025	46.6987	46.8915	76.3954	62.0578
H1.03.23	3	1 h at 38°C	2	WT	46.8083	38.6825	305.348	19.9787	174.808	187.385	357.839	84.5196	284.991	85.3635	282.931	157.104	64.3091	131.519	292.654	79.2216	308.445	71.6737	110.085	161.492	106.838	137.417	241.187	93.6954	235.162	100.428	577.219	105.398	196.313	119.383	184.611	84.8409	89.9907	88.6723	75.3928	148.876	117.812	90.2094	55.1811	66.1515	836.969	53.6807	47.9131	72.8639	48.3977
H1.03.28	3	1 h at 38°C	2	WT	47.9121	34.676	220.374	14.1153	126.177	149.697	205.47	55.2788	224.328	68.1462	243.251	157.236	88.193	96.3896	329.843	67.2784	201.14	47.6403	94.4801	137.793	77.7575	90.8322	175.079	90.6703	229.029	67.7143	461.844	103.144	196.653	90.342	178.267	94.3156	81.2573	54.1903	69.6968	155.021	108.71	85.62	44.5251	55.8438	869.121	39.7804	34.8814	50.877	50.8662
H1.03.54	3	1 h at 38°C	2	WT	47.2954	31.7798	220.523	18.7432	131.501	125.431	203.219	50.0988	201.009	59.8054	210.433	130.46	60.8783	98.3129	341.65	83.4712	194.606	51.2587	81.6574	114.54	95.1174	88.1995	234.943	62.4569	174.347	85.7141	415.016	102.063	156.487	69.0227	146.162	57.5326	72.1815	63.4993	64.1318	139.614	82.0019	88.3078	24.8908	56.4565	795.535	50.1748	31.607	53.3593	37.2456
H1.03.71	3	1 h at 38°C	2	WT	56.9506	33.511	312.097	16.4132	188.262	171.664	321.292	53.2218	259.07	79.1942	244.779	186.47	75.0031	152.867	391.717	100.113	219.744	58.1223	120.295	184.568	89.2021	117.825	278.331	42.5279	268.071	93.8474	500.323	134.548	201.967	126.502	175.929	88.0844	79.2404	75.8513	89.4168	179.472	109.418	94.4901	33.0519	69.0845	1152.74	54.5021	53.2812	64.503	49.2419
H2.03.08	3	1 h at 38°C	2	WT	74.201	45.3553	407.091	25.2198	193.254	249.503	460.318	98.5742	373.032	106.678	412.59	211.605	102.283	174.454	516.049	100.901	328.852	76.1453	158.396	186.317	130.65	151.311	327.625	106.154	336.154	126.802	977.503	180.827	323.853	138.646	247.642	144.982	115.271	107.227	110.444	273.918	169.18	140.608	75.0043	114.754	1590.85	68.4671	65.1013	92.6269	66.8576
H2.03.14	3	1 h at 38°C	2	WT	57.7362	36.7375	375.059	17.9864	173.07	158.925	402.911	90.9997	320.437	78.8089	378.58	218.337	84.0073	154.366	508.884	82.4223	337.322	67.8781	116.552	184.373	120.163	137.054	357.999	88.0232	271.118	116.1	1044.04	174.039	357.892	111.389	214.165	113.652	95.0792	132.728	87.7003	219.218	198.074	113.72	52.3154	98.4642	1319.26	62.1742	62.0969	75.5874	58.2529
H2.03.24	3	1 h at 38°C	2	WT	66.9107	45.0825	445.887	27.2059	179.835	208.954	564.493	77.3121	355.456	93.4113	405.977	247.622	86.2007	152.056	477.742	75.1538	350.659	58.9499	138.664	169.109	144.661	145.124	317.777	83.6831	355.459	123.344	1226.98	192.771	334.161	138.151	239.071	148.927	113.501	96.3508	99.6268	239.273	203.733	124.762	48.7473	118.65	1735.41	69.5739	68.0429	89.8891	74.8545
H2.03.51	3	1 h at 38°C	2	WT	55.2465	36.8838	357.578	16.5158	159.783	161.047	382.389	62.9995	285.762	68.3459	356.708	174.171	62.5977	131.413	427.402	67.9824	282.652	50.5717	98.464	168.63	131.5	119.083	317.654	83.3556	248.328	99.2986	1007.47	144.28	347.232	98.8846	196.797	130.716	116.927	97.3349	77.4279	252.126	140.185	125.109	53.5238	65.832	1196.09	42.3138	56.9249	58.841	46.4377
H2.03.53	3	1 h at 38°C	2	WT	67.2342	46.6986	527.51	22.8291	189.172	211.767	462.443	92.8183	303.75	94.1247	406.079	244.723	83.7304	187.422	651.207	96.5579	459.699	49.2636	132.091	154.897	154.551	157.728	424.555	90.2235	351.111	109.955	1510.26	162.156	365.217	113.476	238.139	137.384	107.269	133.535	112.696	249.052	149.423	139.275	47.0334	93.0119	1487.68	61.4869	62.3543	81.5651	60.0722
H2.03.71	3	1 h at 38°C	2	WT	89.5994	55.2837	706.078	27.1056	190.574	210.879	531.486	73.7264	371.958	94.9762	429.577	253.174	68.1454	143.905	512.367	106.831	361.879	84.3335	124.925	183.748	135.256	135.803	356.554	91.2429	397.219	135.705	1359.55	163.784	364.805	114.649	248.785	163.822	127.734	93.4173	105.135	288.912	182.605	170.741	89.5783	100.415	1801.9	79.0584	71.8905	81.8397	58.1399
H3.03.01	3	1 h at 38°C	2	WT	51.0575	32.7619	267.114	19.5821	118.763	110.323	248.904	61.2314	244.208	68.2953	271.501	224.603	55.1938	115.949	500.393	65.6623	549.65	44.8462	83.1027	159.709	91.2211	103.584	287.424	80.4707	341.833	78.2293	557.72	103.638	325.44	71.7549	178.484	78.3601	79.8168	157.244	71.1261	241.728	121.65	103.449	34.1662	68.2862	686.394	46.826	45.5179	54.4054	45.1364
H3.03.05	3	1 h at 38°C	2	WT	36.7561	25.4602	241.966	11.7973	89.9116	78.7045	212.137	50.3614	197.907	55.1379	210.438	155.904	53.0205	90.348	433.966	48.253	440.605	42.1219	58.8404	141.23	68.779	72.7482	233.544	53.5742	221.636	62.2084	363.529	89.1889	270.985	59.8923	137.383	52.754	59.4707	144.26	54.5994	181.49	100.892	69.2754	33.9884	51.0012	528.883	37.7986	35.0007	48.2644	37.3409
H3.03.28	3	1 h at 38°C	2	WT	38.1651	22.5043	199.88	13.746	95.4877	81.0777	204.984	41.4796	220.608	52.6612	233.138	193.552	73.363	121.575	421.598	51.4434	780.601	47.6889	71.4879	143.176	74.4917	80.538	291.886	75.5166	263.961	70.8787	426.295	103.833	345.702	64.8544	185.809	57.1596	75.0602	254.805	74.0509	176.316	134.554	86.5297	31.9235	44.1063	466.646	41.5727	43.1272	47.3279	47.6333
H3.03.29	3	1 h at 38°C	2	WT	34.2478	23.3164	202.338	16.003	87.7055	79.932	187.022	49.3939	197.054	56.6068	207.454	179.641	64.7341	91.9141	394.221	54.0301	631.286	47.5731	64.2241	140.222	74.2353	86.4437	294.337	100.496	246.818	73.2609	385.142	96.0322	320.435	71.3383	164.742	67.8992	94.5267	197.011	70.4958	179.103	134.228	143.598	38.0132	47.2288	422.237	42.5637	39.2062	49.3395	44.1521
H3.03.34	3	1 h at 38°C	2	WT	53.1494	33.9024	319.981	18.7649	122.03	105.777	253.702	59.6591	262.794	65.5745	303.889	227.1	66.9797	118.913	544.67	82.1721	505.485	51.2891	83.3138	154.655	98.7273	110.911	307.298	183.649	306.722	85.9279	468.34	136.451	352.508	87.7896	169.528	98.8173	200.305	156.353	76.7023	291.926	155.049	289.363	52.0264	75.3298	779.016	63.1841	47.6101	63.6531	52.6743
H3.03.45	3	1 h at 38°C	2	WT	56.7838	32.669	283.084	31.7068	133.872	107.704	479.467	111.615	265.74	114.276	298.469	194.427	68.7821	121.189	470.303	90.7965	353.003	47.8648	159.099	193.406	112.016	118.83	278.082	132.177	284.329	98.3586	462.639	205.657	321.139	93.4621	192.976	86.0587	162.351	103.633	77.0644	218.627	167.19	213.362	38.6515	75.5614	743.4	74.3884	47.7993	66.0938	61.1782
H1.04.09	4	12 h at 21°C	1 and 3	WT	87.0811	54.1084	496.633	31.0721	212.317	263.83	279.721	105.037	347.425	131.597	397.774	222.934	106.265	172.331	312.57	118.726	435.947	55.9357	143.548	218.564	160.565	118.2	367.724	72.5261	426.432	120.606	528.138	149.043	240.267	109.991	227.364	187.434	117.814	114.294	103.121	198.84	178.841	162.481	54.5629	128.366	1905.01	81.9625	59.6624	90.0707	55.6896
H1.04.22	4	12 h at 21°C	1 and 3	WT	51.4498	29.8745	626.125	18.6808	141.361	181.482	164.782	70.0558	233.56	85.9505	272.173	146.231	64.5551	108.349	206.948	76.3279	253.796	41.9302	102.738	132.529	117.644	77.1389	218.562	44.324	243.538	88.2249	321.507	105.599	128.384	66.8622	166.993	108.838	72.4022	71.1479	61.8152	105.914	79.0128	82.189	34.0237	64.6954	1142	57.4125	39.9799	56.8593	41.5097
H1.04.23	4	12 h at 21°C	1 and 3	WT	142.167	81.7162	581.208	51.6827	296.392	402.797	431.009	144.464	562.984	187.927	614.387	319.411	117.208	260.946	481.388	176.169	690.56	125.173	221.603	282.255	214.879	214.416	628.473	127.726	671.486	180.343	665.082	237.118	411.683	175.808	401.864	279.452	151.116	191.119	161.224	355.619	258.219	214.487	79.413	194.759	3271.1	132.8	94.2761	139.742	99.6568
H1.04.28	4	12 h at 21°C	1 and 3	WT	64.6921	43.1779	324.009	16.5966	192.06	212.781	254.79	58.586	312.765	102.64	358.791	199.551	65.5891	130.506	311.745	97.0858	386.79	55.4697	132.849	221.094	142.882	107.171	338.723	77.2242	390.64	108.121	494.53	170.126	273.866	98.0094	215.011	139.773	101.361	126.04	95.5146	170.751	156.682	131.061	60.4565	104.473	1575.63	76.9126	60.0382	75.1468	61.1027
H1.04.54	4	12 h at 21°C	1 and 3	WT	182.887	100.582	860.176	62.479	429.168	480.006	476.71	252.547	692.686	302.605	924.371	528.511	218.619	370.2	665.049	222.403	1142.11	186.951	361.271	591.856	351.442	292.111	882.191	209.84	791.518	220.674	857.398	369.275	799.682	256.817	536.485	390.586	230.315	242.831	240.834	491.359	373.899	431.048	144.383	284.896	3150.39	162.081	150.723	178.841	148.268
H1.04.71	4	12 h at 21°C	1 and 3	WT	147.819	94.4943	652.305	51.2736	401.709	482.143	434.664	221.273	658.488	237.623	778.79	428.049	193.804	293.723	622.179	233.561	837.581	130.811	299.661	311.556	274.64	229.693	686.581	199.81	913.091	237.111	654.619	283.605	539.845	232.942	469.371	354.659	251.481	232.304	187.501	451.492	375.089	368.685	102.869	209.588	2935.44	137.843	137.775	164.138	122.254
H2.04.08	4	12 h at 21°C	1 and 3	WT	96.4818	54.4205	1441.25	40.5137	268.857	340.819	557.679	152.127	487.282	157.947	560.014	315.467	138.122	220.193	419.951	134.308	522.349	75.9265	211.872	266.42	237.965	157.833	481.545	118.174	407.029	179.107	1273.94	215.66	381.214	189.147	297.011	195.191	151.357	164.539	144.867	260.442	205.693	202.636	91.6823	130.118	1665.39	105.016	80.8978	115.488	95.2155
H2.04.14	4	12 h at 21°C	1 and 3	WT	101.739	60.4566	684.863	43.0723	244.699	251.706	600.89	134.806	405.26	123.74	539.215	323.265	114.686	210.317	406.591	129.163	562.101	83.9028	163.23	230.575	174.069	170.106	462.881	119.145	381.07	178.61	1495.77	222.583	449.825	158.165	347.901	194.006	161.239	159.553	147.73	311.824	249.063	206.101	74.4401	114.681	1747.31	106.602	85.0525	121.26	106.506
H2.04.24	4	12 h at 21°C	1 and 3	WT	98.7015	70	620.481	46.2119	243.156	264.258	509.973	135.734	450.537	145.347	580.547	341.173	128.128	215.999	365.253	131.141	579.701	91.8747	176.847	222.084	183.84	197.306	385.559	129.614	467.856	214.416	1077.57	259.827	420.965	187.372	281.644	208.868	167.028	161.714	134.618	289.788	270.071	228.865	72.2136	116.37	1649.89	123.532	96.9246	120.795	120.743
H2.04.51	4	12 h at 21°C	1 and 3	WT	91.015	63.2205	425.102	34.1947	244.221	237.192	455.639	134.658	411.44	143.749	502.615	258.65	128.618	161.591	374.788	125.11	423.938	73.7279	170.217	200.328	186.7	163.978	329.284	117.454	403.644	200.492	720.883	209.342	461.176	170.696	235.991	175.875	145.118	151.863	139.223	309.65	232.538	204.31	91.1621	117.644	1312.93	89.4983	87.8416	129.179	90.3315
H2.04.53	4	12 h at 21°C	1 and 3	WT	80.2463	56.6135	548.041	35.5076	259.723	254.183	480.324	103.265	390.176	144.614	528.696	281.774	119.024	182.714	366.115	118.079	452.993	119.574	160.699	226.425	211.71	164.176	397.902	140.308	401.966	198.05	864.25	205.061	378.953	163.56	246.222	197.97	172.629	159.088	121.838	251.05	206.35	201.073	67.7522	118.52	1349.99	115.123	82.1492	107.671	97.0609
H2.04.71	4	12 h at 21°C	1 and 3	WT	110.209	71.5809	518.895	37.3459	274.047	284.161	473.303	155.259	458.174	163.465	613.751	282.506	129.616	205.211	401.906	151.493	442.591	99.0933	212.809	252.4	248.546	183.036	410.493	114.443	529.777	203.159	901.048	227.771	490.037	180.213	293.217	208.975	168.042	152.915	151.395	339.279	244.785	242.543	115.294	131.183	2056.61	132.293	107.639	121.977	105.73
H3.04.01	4	12 h at 21°C	1 and 3	WT	93.0286	40.7375	274.647	20.4019	110.495	120.996	230.174	63.7184	254.678	86.5348	294.275	199.936	54.7441	79.0185	285.661	57.7076	352.197	46.6385	74.36	162.22	95.3482	90.7259	249.774	90.3831	280.598	89.0185	413.329	135.864	266.758	83.3874	178.818	68.084	90.81	132.132	79.4349	282.753	156.587	132.161	48.0152	108.409	982.752	61.0324	51.4192	65.219	42.1535
H3.04.05	4	12 h at 21°C	1 and 3	WT	85.3009	41.7028	384.496	17.4888	93.4078	107.373	205.53	54.6857	205.88	76.3528	275.323	183.468	48.2804	48.5529	341.723	38.796	495.893	38.6044	68.5065	134.464	75.8313	82.6063	257.423	70.0352	270.882	62.836	385.162	117.729	317.479	63.0989	174.506	67.7522	84.2886	194.156	73.7724	303.35	117.456	94.4859	43.7312	85.932	991.146	54.7896	38.9165	51.5375	33.8538
H3.04.28	4	12 h at 21°C	1 and 3	WT	96.8656	39.8519	283.121	23.7333	107.738	117.016	250.33	61.7954	246.713	94.0739	290.746	231.443	58.0173	77.1835	334.045	48.532	639.92	51.852	89.9431	150.12	94.6606	92.3037	318.981	91.999	292.474	70.9941	368.525	135.399	404.514	74.7961	231.402	69.9398	98.7653	267.222	82.7573	300.045	149.821	100.894	60.2553	120.168	1094.06	48.3181	49.7413	55.6838	38.6683
H3.04.29	4	12 h at 21°C	1 and 3	WT	100.825	39.0924	289.789	16.5892	110.844	117.491	178.785	55.0887	221.58	83.811	307.965	259.964	45.9506	74.3304	365.16	50.3622	727.738	65.3818	80.301	155.252	111.582	95.3767	396.582	79.7161	337.909	66.5316	408.803	199.051	410.578	73.3529	266.629	80.0075	93.9116	276.813	87.9041	349.222	172.02	101.424	49.0829	114.606	1207.67	62.4631	48.9249	63.0195	39.3684
H3.04.34	4	12 h at 21°C	1 and 3	WT	102.412	42.3527	272.043	17.3979	104.906	110.974	209.031	43.5755	216.569	67.8357	276.127	229.667	43.3282	68.9161	300.024	37.0858	632.842	69.1336	84.4107	156.137	94.9857	91.9095	282.106	75.2435	311.05	70.1466	395.02	153.283	304.263	74.9837	213.092	78.8578	91.5292	209.212	82.4227	318.556	153.643	111.83	40.6897	109.609	979.415	51.0103	45.1338	52.7143	41.7381
H3.04.45	4	12 h at 21°C	1 and 3	WT	98.1055	41.536	273.945	19.2541	107.635	117.406	212.721	66.7465	249.586	80.0129	299.339	264.826	47.8986	88.7535	387.525	44.0408	833.147	75.7575	89.4287	185.835	107.248	93.0042	341.647	77.4547	335.604	68.5499	447.355	186.022	379.051	85.2839	220.087	76.6792	100.29	253.933	83.4176	350.991	156.656	124.719	66.7529	113.881	1062.5	65.5781	50.8337	58.6411	50.2738
H1.05.09	5	12 h at 38°C	2	WT	36.2966	21.44	218.796	17.5288	137.353	152.324	243.518	58.7057	144.539	169.959	193.015	89.4842	38.4188	66.3332	212.026	32.9505	125.178	21.8753	76.6026	104.071	55.531	133.391	203.76	26.0685	199.227	41.7901	294.338	94.7511	97.5307	61.1552	79.441	76.9724	43.6512	63.4673	62.7035	250.344	57.1088	59.3193	24.7511	54.9034	788.709	35.0262	25.4531	41.1589	20.5425
H1.05.22	5	12 h at 38°C	2	WT	53.4714	40.493	350.026	64.1008	136.788	164.396	275.276	128.005	141.898	249.801	205.52	72.7845	74.597	89.5075	244.045	53.2076	120.325	33.6573	67.7387	105.374	79.4348	144.804	215.641	42.9829	143.171	85.8027	371.875	102.64	109.39	80.7313	105.713	79.2252	71.6517	67.4587	76.766	202.72	64.4294	69.9603	58.556	47.0367	630.23	39.7272	41.8963	47.4132	40.2489
H1.05.23	5	12 h at 38°C	2	WT	41.32	23.3777	200.251	26.1389	121.425	165.257	265.275	64.8083	142.583	205.703	196.65	130.849	44.7988	56.8984	223.582	38.936	144.012	60.7021	70.5159	94.7294	61.6402	119.958	220.851	50.2457	106.933	65.6954	396.912	109.384	138.817	76.1769	104.238	66.6466	53.8738	72.0089	65.4317	235.205	68.1587	61.3314	35.8577	49.41	528.554	30.7982	29.7024	43.3709	26.228
H1.05.28	5	12 h at 38°C	2	WT	23.7752	15.0346	119.768	8.4846	73.7154	80.628	150.013	29.4543	94.0591	145.63	113.821	44.1247	16.5262	26.0927	102.081	17.3098	51.0125	12.3737	44.8001	42.8293	50.1576	80.4592	117.568	18.7402	77.0687	28.168	288.8	62.2058	80.9461	45.1365	53.0107	48.5809	31.7933	30.9663	40.282	120.004	22.0487	30.5133	25.4923	31.6313	357.355	17.0518	11.7901	22.9462	11.0084
H1.05.54	5	12 h at 38°C	2	WT	31.6768	20.474	143.376	16.1681	101.123	113.609	174.042	44.463	116.242	227.787	140.105	68.2166	25.4674	52.7525	219.757	22.7441	86.618	22.5412	51.4278	73.4096	43.0314	85.3014	194.038	24.1268	95.3681	40.9549	346.93	79.563	93.1796	44.445	80.0573	50.3166	37.3191	53.7177	57.6434	253.589	49.6001	44.0536	25.2794	47.5784	565.989	25.8726	23.8177	32.1044	15.5357
H1.05.71	5	12 h at 38°C	2	WT	41.9167	23.2229	163.995	12.9952	114.177	144.847	170.777	59.5815	141.448	196.416	164.331	80.8943	28.1743	71.4626	252.963	35.8395	103.649	24.6057	57.098	91.5472	70.2523	115.261	311.878	32.1251	129.246	49.1779	440.807	100.27	131.377	53.7006	88.7894	67.4903	38.7449	74.6415	52.502	443.626	58.5247	57.7413	26.0749	58.0999	741.763	38.905	22.1875	33.4783	17.6674
H2.05.08	5	12 h at 38°C	2	WT	97.9865	59.9426	444.158	30.0761	263.229	255.22	442.687	83.4171	427.532	324.526	539.831	319.401	131.484	256.414	546.725	165.942	481.896	84.3091	185.081	243.222	215.308	222.785	615.958	107.136	432.454	177.542	1031.01	256.909	446.597	191.72	242.358	168.083	139.555	182.608	128.149	667.365	208.78	183.377	74.1111	116.456	1592.3	104.218	89.1946	115.712	115.686
H2.05.14	5	12 h at 38°C	2	WT	90.472	59.2018	443.557	33.0469	242.124	245.232	420.37	105.186	435.925	308.352	545.073	339.077	112.846	264.073	634.371	145.994	455.006	70.4176	187.439	224.662	225.678	229.551	575.911	122.709	482.534	160.913	1038.16	274.488	449.732	185.813	257.401	164.45	137.364	179.493	132.398	688.23	237.615	173.695	71.7244	134.391	1807.23	117.452	86.4204	120.361	106.022
H2.05.24	5	12 h at 38°C	2	WT	92.9086	60.339	407.969	30.7804	223.246	230.06	409.608	106.913	405.03	270.821	560.028	360.346	113.615	221.251	471.716	155.123	460.326	80.1237	138.841	258.749	171.75	185.378	503.703	117.058	537.852	148.689	851.25	232.858	424.502	154.05	254.54	209.655	158.803	144.67	107.322	475.713	251.089	219.582	80.9496	116.922	1909.96	81.8338	80.6875	116.931	104.39
H2.05.51	5	12 h at 38°C	2	WT	73.9773	43.716	596.131	24.0761	205.475	212.469	338.63	100.621	342.862	224.043	458.871	278.576	104.53	156.702	389.124	105.895	367.268	53.9797	128.544	154.907	175.155	164.816	460.807	121.647	353.45	140.042	931.731	197.309	350.176	144.385	231.146	185.97	154.673	130.907	83.8464	557.83	226.036	189.822	79.327	66.0124	1173.78	72.1961	70.4179	85.3665	72.5404
H2.05.53	5	12 h at 38°C	2	WT	87.0862	52.5607	594.202	32.9212	200.375	217.035	351.015	99.9407	388.438	254.538	486.238	308.958	94.5654	227.931	439.718	117.076	408.189	68.8018	147.32	194.503	174.854	172.452	492.917	129.253	438.848	146.046	979.531	201.918	395.742	140.918	269.069	179.48	139.751	152.495	105.334	541.887	245.809	151.312	104.114	88.7038	1314.64	76.7344	79.3625	100.392	81.1226
H2.05.71	5	12 h at 38°C	2	WT	91.3057	52.2121	766.742	31.3873	224.469	214.956	365.681	122.691	418.329	293.238	458.401	325.036	124.12	228.774	501.257	126.106	451.603	103.592	148.88	208.225	162.582	180.965	575.676	82.1198	410.056	144.966	877.349	200.653	373.49	139.884	228.215	164.839	142.949	155.52	108.607	615.121	238.862	166.191	85.1943	103.821	1521.5	84.7727	89.6102	91.0722	98.2315
H3.05.01	5	12 h at 38°C	2	WT	77.0297	46.8151	306.486	20.7412	139.462	138.839	268.706	79.4819	346.864	205.068	359.984	291.786	79.0408	158.849	551.267	94.8819	499.072	81.081	103.274	179.11	119.853	177.919	354.223	114.088	467.222	98.6987	579.896	154.633	342.777	107.077	191.41	94.1477	131.32	151.534	102.304	492.231	172.873	149.962	61.5973	91.572	917.819	59.6794	71.7502	75.8357	67.4825
H3.05.05	5	12 h at 38°C	2	WT	52.9383	33.1116	278.039	17.1346	107.197	107.328	236.145	49.8015	258.234	159.793	255.163	244.063	54.1688	99.8496	560.123	59.9154	598.575	43.5669	83.9893	148.548	87.1358	126.41	328.613	77.9383	362.776	71.7547	469.933	148.355	351.711	80.6935	181.192	71.9222	87.8551	190.197	81.1852	460.362	135.811	99.6774	39.0961	76.881	680.085	58.1308	48.2931	53.2487	56.1224
H3.05.28	5	12 h at 38°C	2	WT	49.4327	37.7001	395.035	21.9494	123.308	128.745	248.89	68.5244	267.547	168.618	266.95	265.249	69.1267	110.792	465.633	72.5277	695.773	62.2373	96.9088	162.515	100.573	150.824	342.73	109.227	347.798	94.9539	550.135	153.605	388.246	94.3063	183.368	76.3715	100.834	220.673	89.2539	413.101	159.214	122.078	54.5331	74.4304	625.77	62.9568	58.4472	62.9705	66.0007
H3.05.29	5	12 h at 38°C	2	WT	51.1026	35.6015	356.224	19.1987	111.177	113.639	191.861	45.474	282.374	167.772	284.214	255.517	61.9993	132.105	539.436	68.9769	718.537	57.0351	72.0154	149.732	93.577	121.228	331.925	89.6848	367.059	81.2359	499.256	149.691	373.045	90.4625	202.924	84.476	94.0311	208.27	79.0739	410.381	154.228	90.1862	35.9311	69.9351	756.289	47.1435	47.3744	53.9828	63.7695
H3.05.34	5	12 h at 38°C	2	WT	61.0664	43.1849	380.265	23.4701	124.477	125.287	239.675	62.3186	293.486	156.401	294.628	281.646	71.6598	141.566	512.95	80.9378	682.402	58.2727	87.3274	148.629	112.442	142.536	343.646	114.107	358.575	98.8922	680.861	174.99	380.248	86.6732	221.494	87.4249	129.494	220.851	91.4133	436.438	156.294	155.729	51.4067	71.2344	792.732	62.6848	59.3002	62.977	67.8685
H3.05.45	5	12 h at 38°C	2	WT	48.4234	33.3555	140.244	14.0068	92.5209	109.465	230.188	58.5448	222.664	150.365	239.121	217.661	57.1555	135.409	447.288	76.274	545.695	44.6963	76.6418	115.714	94.4913	120.763	303.195	82.1486	316.269	74.0459	556.914	155.541	326.312	79.4725	170.544	49.0646	81.0036	172.338	73.8675	349	121.662	88.3885	38.0087	55.2367	654.536	50.1228	45.4738	52.3368	61.6617
H1.06.09	6	13 h at 21°C	1	WT	47.2867	25.1823	160.676	15.2927	80.1078	126.299	174.044	46.509	131.057	118.345	152.143	76.128	34.8978	37.5471	169.057	33.426	68.2811	39.8252	59.3159	78.7889	47.4588	86.2093	156.959	43.425	130.706	42.1851	314.154	63.6497	127.322	46.6511	68.9342	59.4437	38.8895	41.8252	48.4475	165.844	58.3083	54.7667	21.833	53.1396	827.982	37.1323	23.7616	34.5615	14.2796
H1.06.22	6	13 h at 21°C	1	WT	36.2266	21.1713	161.825	9.83043	71.3767	112.38	162.502	36.6343	113.154	123.59	135.688	69.2898	22.2513	32.1642	147.275	16.4436	84.1503	6.78865	36.1418	72.4405	34.6606	83.794	165.179	30.3112	100.63	35.0383	357.841	54.3815	124.177	40.2943	82.4306	44.5619	29.8408	34.2629	44.3218	139.643	54.7477	42.6938	15.092	41.0698	693.361	28.1041	21.4098	27.0497	18.3279
H1.06.23	6	13 h at 21°C	1	WT	27.0112	20.8597	121.726	9.67621	53.912	107.957	130.765	2.09096	88.5617	122.708	133.628	46.7919	15.1717	25.877	104.974	14.254	51.8812	24.3926	44.8172	75.9259	37.9933	81.3209	114.386	11.1627	103.53	23.6982	273.597	57.1554	107.373	26.3657	65.3808	44.9385	27.4857	26.737	41.2549	97.3721	26.2072	28.413	26.3475	42.8292	605.601	15.876	16.0659	24.5639	12.1651
H1.06.28	6	13 h at 21°C	1	WT	23.4817	15.983	91.6074	9.87717	53.6633	75.9085	126.892	19.4046	91.2196	141.655	113.987	60.8585	12.1828	23.4019	77.3467	12.4887	62.7593	25.913	38.4073	72.3274	25.2715	76.0228	84.2194	16.9893	71.6617	32.199	159.557	55.8288	105.119	36.9027	76.0968	58.1686	32.0673	22.1724	38.6302	56.4484	42.9543	31.828	12.1747	19.6369	351.421	17.8584	13.6449	21.9957	14.205
H1.06.54	6	13 h at 21°C	1	WT	31.583	17.5941	108.787	9.43764	59.5009	103.293	136.634	11.1838	98.1537	132.445	117.806	37.3155	19.1043	21.9338	108.604	8.54881	65.8349	3.76103	39.5449	99.374	45.6296	84.6249	102.427	14.7885	99.5926	19.9146	254.936	34.7961	130.297	39.7047	53.7463	41.5709	28.5052	26.2818	39.2888	81.0966	60.5679	34.9833	17.278	37.556	523.578	15.5284	13.3412	21.2273	9.57611
H1.06.71	6	13 h at 21°C	1	WT	39.7808	23.0336	193.469	13.0872	87.0718	139.095	217.517	27.4421	147.843	240.027	183.869	86.6808	23.037	43.3587	192.635	21.2072	92.0494	13.2552	54.0108	102.369	54.4382	114.283	166.18	60.3825	179.61	41.9095	405.59	76.859	139.673	60.4373	130.266	58.6343	49.5638	48.663	56.0174	196.595	84.721	99.3314	35.6705	45.3434	798.688	26.2295	37.7914	38.2655	16.7148
H2.06.08	6	13 h at 21°C	1	WT	109.935	52.1382	417.55	28.451	174.741	268.738	346.365	133.065	387.467	123.167	434.658	221.035	119.951	165.191	369.998	101.212	309.097	67.8958	149.264	212.369	117.998	120.313	332.279	80.6104	280.749	117.285	925.766	134.877	359.012	97.2573	225.634	146.774	119.33	119.753	89.2201	219.726	198.278	122.787	37.5525	89.3349	1431.45	74.1671	67.2775	82.9973	59.3714
H2.06.14	6	13 h at 21°C	1	WT	66.9715	44.9223	483.215	28.4232	161.384	188.154	407.981	92.0123	350.235	135.76	410.995	231.786	106.668	157.158	436.27	92.8589	680.401	73.5198	117.615	192.797	142.082	113.854	449.567	113.105	307.496	132.441	1121	177.35	466.005	113.763	278.079	144.314	135.546	237.93	113.604	231.782	224.128	129.504	82.539	68.8002	1145.73	74.7687	58.4444	86.1414	73.4376
H2.06.24	6	13 h at 21°C	1	WT	78.423	56.2252	555.589	33.9435	203.425	218.916	436.219	133.667	356.84	109.165	460.504	337.05	104.921	172.292	381.553	113.275	554.132	72.4873	145.018	205.496	164.915	138.165	385.021	84.8036	340.439	164.382	1051.16	197.69	395.68	167.732	266.921	176.689	139.909	177.403	118.441	276.193	215.441	137.322	88.043	82.5161	1469.62	77.328	74.0374	114.852	89.6217
H2.06.51	6	13 h at 21°C	1	WT	63.82	40.6163	412.853	24.542	181.9	183.226	298.338	103.906	332.93	103.998	430.667	262.758	97.8469	151.091	299.519	94.1716	634.959	73.7503	139.681	196.951	160.423	128.449	467.764	89.2928	286.872	130.601	829.211	198.335	417.239	100.921	359.179	132.574	114.008	190.255	90.6283	223.028	228.158	124.598	65.147	59.1594	900.86	60.5726	67.0792	84.5097	72.2707
H2.06.53	6	13 h at 21°C	1	WT	70.3008	46.1078	482.498	26.9225	193.989	200.44	380.716	142.454	346.979	103.52	460.288	284.138	92.6086	198.559	352.732	127.326	564.824	81.0829	165.469	233.084	156.068	117.556	462.946	79.5543	304.654	128.022	891.82	193.42	405.671	110.143	287.882	167.626	119.262	193.128	101.857	207.92	228.318	121.315	116.293	66.2552	1129.19	62.2082	72.6095	87.8691	62.0768
H2.06.71	6	13 h at 21°C	1	WT	87.053	47.7414	719.751	30.6593	224.996	344.172	567.289	170.553	453.265	130.175	547.424	305.596	127.446	213.292	444.133	154.171	520.153	94.8705	170.979	317.551	197.863	173.547	602.989	90.5391	371.227	150.061	1912.23	180.763	352.874	118.613	298.5	180.258	110.852	113.162	102.101	290.473	178.428	137.569	93.7484	100.429	1789.05	93.5755	68.8936	100.607	80.0661
H3.06.01	6	13 h at 21°C	1	WT	65.4061	45.722	386.508	34.8738	132.24	125.902	624.75	121.983	241.477	85.5361	259.091	206.19	57.0372	108.253	417.173	88.3958	487.326	60.076	152.637	145.364	117.674	95.6956	260.347	86.7548	262.01	98.687	558.783	134.589	248.435	81.1036	171.604	84.4594	92.3163	110.694	75.979	249.925	126.174	119.084	48.6165	95.4459	696.866	59.5328	59.0851	66.1795	66.9091
H3.06.05	6	13 h at 21°C	1	WT	45.352	30.4513	185.126	16.8342	112.093	94.0366	301.606	60.6314	203.722	63.1818	237.838	210.378	51.2717	84.5941	334.08	54.1331	787.543	52.4059	72.3132	140.088	77.9332	75.5731	419.946	68.0188	250.678	80.4689	473.748	129.86	403.269	71.053	272.115	65.9307	89.1079	252.25	75.6108	230.818	135.207	80.4252	40.0148	48.7176	603.084	43.3782	47.396	51.2178	47.3416
H3.06.28	6	13 h at 21°C	1	WT	49.5994	39.0068	230.526	18.3498	119.706	98.4057	227.13	54.2154	214.765	75.5546	293.749	240.892	58.4261	129.699	386.207	68.858	1063.18	76.6789	77.2415	154.976	96.6066	100.772	374.038	96.5397	311.799	95.5318	621.126	184.469	491.685	90.5004	280.807	86.7443	97.7822	342.685	96.1496	210.905	153.928	100.152	53.8795	69.3015	629.589	47.0143	57.4679	62.029	72.7816
H3.06.29	6	13 h at 21°C	1	WT	52.4261	34.6313	257.439	22.1714	119.104	106.915	292.837	59.2053	240.621	92.4201	283.733	223.973	68.8539	115.369	401.781	61.6826	705.267	65.1187	103.231	170.708	111.608	101.427	322.7	94.4305	311.488	96.4126	588.84	156.327	398.366	96.0949	243.488	78.6279	96.7995	215.125	83.4227	231.24	180.334	106.987	49.8124	62.8964	681.738	61.7635	54.9467	63.7786	76.7538
H3.06.34	6	13 h at 21°C	1	WT	82.7679	50.4232	361.631	58.977	153.318	126.898	962.485	204.081	360.699	97.1785	361.585	283.476	71.3829	126.357	590.709	102.574	769.472	110.068	229.395	268.991	140.857	114.711	373.59	107.942	388.486	110.815	805.327	199.775	446.233	108.351	285.861	112.088	116.455	189.622	107.564	416.546	188.471	138.422	67.4763	122.279	1047.26	89.8343	76.2586	82.8046	90.2301
H3.06.45	6	13 h at 21°C	1	WT	56.0809	37.3101	282.61	19.5322	128.792	120.758	306.011	64.173	236.015	75.7359	277.489	202.262	53.2657	99.6893	400.715	62.1137	728.873	53.2358	86.1253	154.245	105.635	94.0402	322.698	92.6919	331.274	94.9656	642.12	132.357	429.534	89.5828	223.071	84.4248	100.358	212.036	88.799	239.224	171.132	106.431	49.6271	61.7499	721.042	56.5244	54.3658	61.1532	60.9949
H1.07.09	7	12 h at 21°C, 1 h at 45°C	3	WT	59.6933	34.6837	246.477	56.2896	96.7069	189.714	240.842	51.543	210.361	154.743	214.385	95.1966	49.7877	72.8688	246.214	51.8924	137.895	26.7258	80.4879	110.395	69.9073	106.425	213.712	61.0749	153.613	64.6667	481.598	84.8192	138.691	73.3463	98.7054	102.819	69.5554	63.1046	62.4723	203.172	97.652	89.0582	33.1608	54.3714	876.228	50.5823	30.3332	58.8711	35.0606
H1.07.22	7	12 h at 21°C, 1 h at 45°C	3	WT	47.1482	36.9347	271.295	25.4598	112.896	168.307	601.394	110.163	255.352	116.848	269.986	127.618	58.0673	90.2818	330.578	71.8073	219.66	57.0895	89.2166	153.569	73.0912	109.785	279.171	60.4787	246.292	82.8365	521.777	134.166	177.249	74.8177	182.594	91.4996	80.8182	84.3027	87.4774	264.294	118.127	105.835	42.0634	77.1169	1100.65	67.0587	37.1441	88.7486	51.6014
H1.07.23	7	12 h at 21°C, 1 h at 45°C	3	WT	54.0861	35.1981	263.571	24.1166	95.7582	199.105	266.281	79.0333	191.572	112.188	223.371	117.583	43.0698	73.6144	271.875	40.552	116.218	39.4062	65.8619	136.112	79.2588	107.997	224.236	76.1053	239.731	62.9908	536.969	106.092	183.832	70.4418	109.029	79.1941	87.3312	64.1849	69.4803	229.034	94.2672	149.079	31.3114	63.7721	1126.33	37.1474	34.9214	60.6004	32.9275
H1.07.28	7	12 h at 21°C, 1 h at 45°C	3	WT	53.5126	26.4534	174.11	17.0854	80.3458	141.269	222.841	41.0303	167.466	133.304	193.838	87.8374	33.5363	54.6992	267.413	30.6011	154.04	27.6917	55.393	112.391	58.8104	87.1652	236.409	38.5903	162.448	31.3311	471.766	69.3385	175.717	51.5743	118.109	58.134	55.4574	67.6455	52.0438	234.427	77.0217	81.7738	42.0923	58.1719	912.929	28.6611	27.388	38.3774	21.722
H1.07.54	7	12 h at 21°C, 1 h at 45°C	3	WT	45.6805	22.7026	148.08	15.2395	79.1013	149.382	329.421	70.6112	169.569	159.52	170.748	85.6342	35.8286	52.688	189.461	23.9866	131.734	18.8285	52.3034	150.184	53.4481	99.2152	233.734	64.2448	154.016	45.3834	446.654	72.7317	144.507	53.6364	117.782	62.5805	57.052	44.3235	51.9515	250.692	81.5078	90.3034	39.6584	43.9025	873.614	31.7103	25.8985	42.2189	20.8663
H1.07.71	7	12 h at 21°C, 1 h at 45°C	3	WT	74.5693	35.146	298.916	28.4199	128.903	223.741	503.482	100.319	249.665	120.57	264.756	174.205	57.2154	84.7189	355.131	69.094	218.394	58.6457	88.5282	178.844	89.6718	108.904	326.822	66.9561	220.723	71.3375	751.516	106.87	237.215	75.9118	185.218	85.4364	89.2563	65.2267	65.275	301.373	85.1049	116.037	30.6886	98.0352	1262.48	46.763	45.0333	48.5922	42.9789
H2.07.08	7	12 h at 21°C, 1 h at 45°C	3	WT	77.9444	48.9212	489.393	25.6089	221.522	231.148	377.457	131.193	470.364	126.228	530.176	312.507	142.126	256.142	489.262	161.374	500.976	107.782	181.771	246.49	195.27	167.07	481.02	129.136	300.522	139.2	1210.55	240.208	396.225	140.931	296.69	207.417	161.565	147.412	121.078	321.414	207.63	201.9	75.4569	111.031	1710.51	90.3281	71.1762	101.753	65.7038
H2.07.14	7	12 h at 21°C, 1 h at 45°C	3	WT	84.0689	49.3051	575.395	27.7936	218.48	240.131	402.058	157.696	484.329	105.514	531.041	348.692	125.25	256.578	499.77	146.911	521.974	101.368	163.271	272.22	188.239	173.501	532.85	198.015	352.803	133.499	1222.28	210.629	470.777	154.197	347.542	219.656	205.885	161.084	117.578	305.206	220.127	260.907	92.866	97.698	1618.79	67.058	69.565	99.5139	67.1322
H2.07.24	7	12 h at 21°C, 1 h at 45°C	3	WT	97.5751	56.3828	695.75	33.1042	220.526	255.476	388.418	134.959	521.508	117.513	623.257	420.518	139.052	271.402	511.832	207.026	598.853	104.43	184.65	302.653	213.767	190.436	616.012	136.831	387.625	149.505	1331.34	297.781	487.515	158.885	372.956	202.215	169.446	153.478	136.793	365.561	206.376	205.586	77.632	117.258	2220.09	79.1299	84.5457	111.581	83.5711
H2.07.51	7	12 h at 21°C, 1 h at 45°C	3	WT	71.7466	41.8556	529.879	24.5246	166.692	196.441	402.943	76.62	392.5	89.1662	450.312	342.682	101.256	190.479	417.023	127.305	462.306	74.4093	123.775	220.943	119.146	135.582	426.596	86.0986	305.489	100.963	1392.43	206.029	405.419	156.245	259.907	132.843	96.9084	115.938	95.7679	286.239	165.732	98.8021	38.8636	91.6346	1586.4	66.5699	61.9605	87.8015	62.8978
H2.07.53	7	12 h at 21°C, 1 h at 45°C	3	WT	64.6372	37.836	520.481	25.4802	163.32	175.316	376.306	73.5992	332.459	96.8589	409.118	275.317	108.319	150.022	386.134	100.183	386.864	97.3426	116.26	219.968	150.15	130.934	388.064	66.7775	314.6	104.472	1211.72	199.361	345.079	102.643	248.212	123.884	88.2763	106.895	75.3913	247.388	157.226	90.3198	60.8559	75.9201	1451.18	47.2722	57.0213	78.1083	46.9519
H2.07.71	7	12 h at 21°C, 1 h at 45°C	3	WT	77.0314	50.2955	613.214	31.6781	225.995	247.461	409.382	126.158	475.748	132.566	608.739	375.248	180.835	279.037	477.013	179.433	477.471	113.759	172.457	300.323	182.849	190.235	493.953	101.593	426.555	160.389	1037.21	226.814	440.996	146.23	284.14	197.042	139.436	129.392	124.793	344.803	197.023	145.883	107.829	140.821	1968.18	95.5836	80.4251	107.239	73.958
H3.07.01	7	12 h at 21°C, 1 h at 45°C	3	WT	75.4195	36.4909	242.786	18.5736	98.854	121.839	199.982	50.7052	232.111	88.6002	266.056	227.174	56.301	69.9779	418.101	47.1674	587.552	35.5691	67.2576	142.379	89.5644	105.66	390.516	77.2764	319.315	71.0574	569.799	142.451	309.359	73.2322	200.411	75.7114	83.903	173.005	68.5642	470.252	148.277	95.93	43.9623	68.8256	705.848	44.3765	48.7603	54.1207	42.3214
H3.07.05	7	12 h at 21°C, 1 h at 45°C	3	WT	48.4127	31.4648	193.517	16.3553	109.032	97.4717	214.671	44.9244	238.741	71.2946	236.962	226.468	50.9853	93.4732	418.652	61.5702	660.674	44.8572	61.7784	135.39	84.5825	105.035	372.528	88.7573	277.974	75.6444	633.048	148.014	311.67	82.6197	207.306	67.9847	90.1347	183.986	76.4522	360.8	110.679	94.1336	35.536	52.2564	566.119	38.386	43.7756	55.9937	55.06
H3.07.28	7	12 h at 21°C, 1 h at 45°C	3	WT	52.4557	37.8732	490.721	24.9707	138.981	126.128	269.888	48.576	324.723	112.822	369.838	357.541	75.7194	169.961	741.455	86.4544	1367.36	67.4161	93.2854	229.586	132.469	150.037	809.392	120.851	382.059	94.8937	928.751	196.889	534.907	96.1357	354.554	79.4509	118.482	311.378	116.332	413.549	177.566	151.043	59.0589	64.2103	903.611	46.3889	63.5244	83.5491	80.1372
H3.07.29	7	12 h at 21°C, 1 h at 45°C	3	WT	53.1089	37.9007	333.247	19.301	110.417	104.358	232.142	49.7066	214.407	77.4444	257.905	267.776	58.2413	125.986	502.463	72.8103	1151.78	57.2984	93.5835	155.863	116.631	110.818	477.266	112.991	317.11	86.214	666.574	166.955	409.141	89.7176	295.599	69.7528	109.768	292.579	91.5088	313.374	167.266	121.578	34.5685	58.3004	541.065	43.76	53.1403	66.4794	58.9475
H3.07.34	7	12 h at 21°C, 1 h at 45°C	3	WT	60.1634	43.475	375.926	23.9479	134.661	121.623	237.507	49.9955	259.029	89.2451	291.751	269.821	75.1576	170.273	429.829	91.9447	727.729	60.4605	91.6017	174.049	115.607	133.486	392.897	101.485	311.425	96.8341	693.884	192.824	376.839	107.69	278.172	93.9842	119.826	218.175	92.1176	351.561	177.048	127.943	55.4658	66.1334	589.345	57.1386	63.5543	78.0512	78.5857
H3.07.45	7	12 h at 21°C, 1 h at 45°C	3	WT	50.3466	31.9828	197.73	18.4303	128.138	115.36	228.911	55.5832	255.31	75.6284	282.619	247.822	73.5062	119.082	416.788	77.9556	736.485	60.3765	75.4138	148.936	102.7	116.839	386.761	87.2604	297.101	88.0521	616.051	179.029	340.082	90.023	251.278	80.1424	102.549	197.121	81.4255	328.41	129.312	104.107	43.8422	53.9138	606.874	58.8642	48.3588	61.8805	65.3828
H1.08.09	8	12 h at 38°C, 1 h at 45°C	2	WT	75.0887	36.5477	234.773	26.0199	116	177.584	234.541	113.077	355.565	251.849	304.932	186.286	83.7758	146.803	743.781	70.9492	287.135	39.8372	99.3004	131.733	151.351	164.428	960.071	91.4668	386.327	101.472	865.73	153.844	213.633	107.638	158.646	97.7385	87.9173	179.684	82.9028	1142.37	130.704	124.702	70.883	87.3116	1422.27	58.2949	52.5696	69.0471	40.1171
H1.08.22	8	12 h at 38°C, 1 h at 45°C	2	WT	73.5656	44.6523	300.983	33.7371	210.586	242.635	232.112	112.789	470.394	274.935	367.133	259.849	76.3982	223.689	774.623	129.294	431.731	61.7619	144.237	191.22	163.112	214.877	802.938	73.1719	381.318	103.434	814.867	215.762	286.499	145.406	199.125	108.777	105.821	199.913	115.551	960.664	156.089	138.842	78.4209	107.727	1394.76	73.2843	48.7675	91.8524	70.4994
H1.08.23	8	12 h at 38°C, 1 h at 45°C	2	WT	93.137	53.3852	426.397	52.9316	202.578	263.469	451.365	230.802	475.215	300.03	405.894	339.425	87.5007	221.325	770.438	123.697	502.417	57.0516	160.837	240.437	210.132	206.914	932.76	119.259	430.395	126.699	1105.13	206.509	278.535	139.403	229.231	138.011	133.717	204.001	130.604	1125.92	192.545	221.917	103.791	100.47	1648.58	85.645	60.4462	93.2685	83.8781
H1.08.28	8	12 h at 38°C, 1 h at 45°C	2	WT	80.0564	40.0203	329.228	35.0561	165.554	244.262	250.244	78.557	420.069	309.753	358.182	254.365	76.3483	180.239	715.681	107.082	323.148	48.0304	130.031	239.682	157.863	177.687	660.898	82.4358	408.742	112.203	869.465	212.649	243.345	99.1497	202.278	115.898	108.01	188.653	101.725	943.368	160.327	169.313	68.3855	126.708	1554.88	65.2164	52.1221	80.1464	60.8789
H1.08.54	8	12 h at 38°C, 1 h at 45°C	2	WT	86.5118	47.5069	379.482	39.7117	188.977	242.663	227.302	148.035	431.196	287.035	354.503	189.437	91.3792	173.875	797.341	99.0226	311.143	49.0405	144.085	171.329	175.901	228.528	920.576	105.525	457.467	121.926	891.121	182.655	235.495	94.2652	175.996	169.793	103.129	173.757	120.206	1204.13	204.331	165.125	68.3425	137.844	1576.72	73.1389	67.1654	91.031	60.4533
H1.08.71	8	12 h at 38°C, 1 h at 45°C	2	WT	83.763	41.715	307.753	24.8242	209.603	259.862	216.233	144.042	459.067	293.586	374.717	275.756	89.0361	222.872	843.657	133.401	264.312	46.086	152.027	221.757	194.758	200.816	947.091	101.85	459.096	133.197	964.938	204.32	246.606	131.894	192.937	114.892	112.248	167.312	105.591	1158.03	145.069	182.469	92.0441	102.417	1460.48	61.663	68.8349	77.0042	58.2163
H2.08.08	8	12 h at 38°C, 1 h at 45°C	2	WT	40.9327	28.9203	249.462	13.4212	133.14	139.627	208.738	56.4987	258.717	150.39	262.362	178.719	56.1839	149.995	424.569	88.441	391.342	34.659	94.2225	165.821	88.0883	116.081	383.931	68.7228	244.748	75.8654	493.326	144.682	245.747	79.9209	186.069	99.3598	78.3392	123.943	76.7996	321.993	147.779	97.1375	30.6862	58.4785	787.723	41.5364	43.3404	58.1347	45.6573
H2.08.14	8	12 h at 38°C, 1 h at 45°C	2	WT	40.2424	31.5162	261.784	17.0489	139.187	128.64	229.991	49.1497	242.63	144.312	278.293	162.404	64.0146	134.455	398.588	65.0896	512.528	39.6607	77.9323	127.087	124.824	111.171	484.453	104.053	277.865	83.3273	591.246	136.669	241.987	69.1375	242.113	96.403	92.0108	161.838	83.0478	329.141	157.998	117.695	35.0299	50.2155	864.199	53.4508	45.7415	55.9379	55.6871
H2.08.24	8	12 h at 38°C, 1 h at 45°C	2	WT	43.3922	29.1869	242.279	16.4912	133.767	133.088	267.79	66.4051	263.668	155.169	269.135	197.101	74.1548	171.514	469.211	84.0891	463.473	37.2977	84.8619	156.655	104.838	130.194	419.918	101.861	289.646	86.5267	636.11	167.238	281.816	79.3628	211.744	96.3957	99.2738	164.702	82.5373	363.57	171.938	129.082	44.2052	68.1607	912.081	40.0432	51.7318	58.2126	58.257
H2.08.51	8	12 h at 38°C, 1 h at 45°C	2	WT	39.1575	27.7956	255.618	17.575	118.678	117.722	244.762	66.361	205.076	128.3	239.714	162.138	65.6549	107.895	428.25	82.1189	312.295	27.7949	77.1546	115.096	101.896	107.575	279.942	87.4326	207.864	81.452	596.479	107.439	177.863	70.2488	172.394	87.7503	96.857	105.411	66.089	289.619	114.01	127.089	53.8283	51.1297	614.618	55.2275	38.3624	54.2318	48.4868
H2.08.53	8	12 h at 38°C, 1 h at 45°C	2	WT	40.61	27.2744	242.46	14.1985	131.398	132.748	275.632	38.6353	247.695	151.859	258.226	190.878	58.8355	106.478	389.668	59.6777	399.527	35.804	74.7483	148.113	97.388	97.3312	326.412	95.4877	263.829	71.0908	606.165	103.909	230.98	65.2161	171.609	78.5339	85.1554	123.818	77.2288	278.334	138.846	115.498	51.3598	52.3658	737.428	39.9325	46.4786	49.3623	48.2353
H2.08.71	8	12 h at 38°C, 1 h at 45°C	2	WT	53.3763	36.1675	377.558	56.2719	130.565	137.05	743.91	103.165	286.228	153.433	284.178	224.864	83.6491	164.61	544.656	97.8979	407.593	58.6999	128.641	197.525	92.5413	132.739	475.684	99.2656	303.345	82.7964	830.934	125.737	232.751	78.8817	251.11	85.2022	99.9566	96.6071	76.2751	556.344	148.361	114.432	52.5958	97.6126	1133.74	79.3286	56.2031	61.4266	51.089
H3.08.01	8	12 h at 38°C, 1 h at 45°C	2	WT	58.6162	32.8316	183.695	18.4731	127.404	128.468	245.731	50.7297	281.647	167.809	301.272	286.615	72.6867	111.754	507.664	66.5383	790.828	56.577	77.8702	176.611	112.753	135.975	519.946	105.383	346.574	98.7055	716.534	165.721	362.211	82.422	284.75	71.0049	99.1757	229.4	92.9309	556.169	152.796	101.562	43.7148	57.3282	671.023	50.5009	47.8662	57.3206	51.1127
H3.08.05	8	12 h at 38°C, 1 h at 45°C	2	WT	49.9977	39.2952	380.864	20.5233	128.233	121.259	277.122	66.259	263.392	190.496	286.838	269.069	56.4023	105.428	492.363	82.1523	548.687	48.1545	88.738	148.857	106.292	151.751	441.342	103.89	305.291	99.1059	767.921	172.102	284.93	100.062	226.01	89.8093	116.886	173.302	90.4711	629.347	146.426	139.357	46.0028	72.6357	603.659	51.5512	54.7022	59.9669	60.7167
H3.08.28	8	12 h at 38°C, 1 h at 45°C	2	WT	45.3037	38.0889	593.765	25.1741	130.114	124.938	272.62	60.9943	246.352	161.786	277.288	225.359	63.8247	114.12	446.487	80.3755	633.313	53.8312	88.6016	173.21	110.785	125.986	439.03	96.8248	297.388	102.205	716.243	169.23	326.153	97.2727	268.434	78.0455	114.14	195.272	89.5174	472.979	147.049	146.867	47.0434	61.0502	568.034	54.9901	54.1209	59.9066	65.919
H3.08.29	8	12 h at 38°C, 1 h at 45°C	2	WT	49.3655	37.0172	268.859	21.9128	118.375	108.279	267.637	64.5372	260.068	156.739	282.009	237.604	68.9622	141.369	452.387	80.586	736.201	64.9422	97.1748	169.932	113.125	114.719	420.052	85.5589	334.911	106.537	740.99	174.164	362.324	80.172	265.447	85.3714	109.845	232.793	89.5548	471.397	135.348	127.138	39.4603	70.8378	493.688	61.8303	61.4383	62.1161	72.8963
H3.08.34	8	12 h at 38°C, 1 h at 45°C	2	WT	56.8143	37.7031	251.795	24.6136	116.344	110.137	252.45	54.8802	268.785	187.125	274.714	288.133	70.415	128.329	493.27	80.3791	775.102	59.6611	97.5314	167.959	101.38	139.981	477.152	107.449	322.323	92.6333	779.494	174.144	350.936	83.1759	242.424	66.7221	115.258	216.923	93.6662	632.564	160.697	148.589	53.5243	65.9223	575.669	65.5272	53.4003	59.7253	64.2075
H3.08.45	8	12 h at 38°C, 1 h at 45°C	2	WT	52.5792	34.9004	231.894	18.2879	124.331	114.802	221.712	53.9334	288.598	181.288	288.765	289.661	70.9744	127.987	530.604	75.5342	800.118	58.4416	93.2805	166.982	111.891	141.801	542.553	114.657	293.518	93.3606	727.194	185.577	381.068	85.7271	232.186	72.6556	128.147	261.137	97.6779	586.01	151.545	155.834	48.3469	67.9867	482.471	57.1551	55.8474	56.8851	55.3908
H1.09.09	9	16 h at 21°C	1	WT	33.7337	19.8262	163.854	10.0876	81.6123	146.377	141.666	70.4335	153.478	103.753	151.244	74.9029	28.3143	43.3387	121.07	40.4719	91.6652	31.0914	72.517	101.052	56.6108	83.3812	133.15	23.3389	116.952	29.5058	244.992	65.5587	91.0905	37.8788	55.3878	64.1609	32.6093	36.3701	48.6749	112.73	47.0519	54.4002	1.8795	42.833	654.519	23.9159	19.1275	31.9827	18.1308
H1.09.22	9	16 h at 21°C	1	WT	26.2677	14.4425	104.961	10.1384	49.0731	79.5952	120.047	21.2429	84.6981	84.5883	105.616	51.3416	19.8529	28.6993	81.9159	13.5196	39.145	27.9599	28.0655	98.2287	37.6469	71.4422	102.946	23.3424	104.272	20.3976	197.242	45.3787	105.661	53.6824	81.3939	45.6582	35.1273	28.3085	40.3866	96.2403	41.2469	48.3778	24.9292	30.3642	452.078	20.1617	14.8695	30.3873	13.1951
H1.09.23	9	16 h at 21°C	1	WT	46.5209	45.1856	147.344	27.6825	85.2848	126.311	157.795	30.1143	149.229	108.075	149.445	61.5305	36.1335	45.9474	137.809	28.7023	79.1109	33.0505	58.0796	112.344	65.8192	121.037	148.199	71.7032	130.887	35.651	289.23	75.6706	186.872	58.3821	106.313	47.038	63.5113	51.8404	62.0465	151.158	94.1285	94.1664	32.1334	49.2009	624.037	39.8608	34.0788	64.2105	33.3177
H1.09.28	9	16 h at 21°C	1	WT	39.9085	23.9048	147.054	11.7651	73.0929	115.382	147.845	44.9422	133.436	81.9794	152.899	56.1684	20.9031	53.3111	186.895	18.7531	114.719	27.8973	56.0223	132.37	58.7118	67.6923	200.33	70.9712	144.09	31.1178	311.538	56.1128	134.315	34.1265	90.2208	46.1844	47.7975	53.7568	56.4479	135.942	76.6465	70.6043	28.4996	41.3635	673.171	18.102	25.9091	38.264	20.1091
H1.09.54	9	16 h at 21°C	1	WT	31.3753	20.2316	173.855	14.9954	70.2508	101.228	118.811	11.4972	163.421	83.0082	127.88	55.3285	23.2041	55.4717	151.408	22.8483	84.9101	22.993	61.8512	101.171	46.8925	94.2727	160.621	52.6846	139.31	37.517	234.98	89.2303	140.409	45.2563	88.8424	53.8214	51.805	32.9842	52.4207	142.673	68.4788	64.5175	18.2991	44.4937	575.681	19.8372	25.2584	31.1482	21.4858
H1.09.71	9	16 h at 21°C	1	WT	36.9969	25.0437	209.939	15.7301	60.4736	106.446	178.149	42.0774	138.558	105.042	140.353	46.7904	15.3281	61.0132	143.957	25.5451	70.4722	27.5863	52.5365	58.7671	52.2614	84.246	124.069	36.2319	134.94	39.3924	280.676	70.1549	125.941	46.264	91.6745	41.8507	53.4856	46.145	55.5981	110.57	54.98	72.0378	21.6067	28.5853	712.56	22.2751	21.8973	36.6557	22.7245
H2.09.08	9	16 h at 21°C	1	WT	59.2357	41.9254	406.371	21.2905	155.366	222.051	380.321	71.0816	278.791	83.7024	295.204	154.78	55.1875	114.32	315.728	69.2392	386.659	55.3208	104.375	170.978	95.1606	110.777	414.992	75.5946	242.233	101.162	963.852	119.176	266.922	78.8708	203.697	100.346	89.9225	105.829	82.1494	232.092	144.767	113.295	46.3511	49.368	950.646	49.6392	51.2246	62.33	55.1253
H2.09.14	9	16 h at 21°C	1	WT	56.1139	38.4411	320.594	22.8008	138.931	184.942	300.595	62.9447	257.428	81.583	278.354	143.511	70.9839	96.8566	294.558	63.4607	339.952	35.1215	94.3245	155.444	104.632	88.4462	313.02	110.708	227.977	97.9129	746.74	107.938	231.337	68.1889	190.264	110.897	112.8	105.986	84.4755	188.539	152.95	147.513	46.3641	58.632	822.301	49.9552	43.9261	65.6449	53.0252
H2.09.24	9	16 h at 21°C	1	WT	55.698	41.8303	346.724	19.6538	160.803	145.708	278.547	77.0324	236.854	71.412	284.766	178.506	67.7828	113.861	403.435	77.3411	319.695	38.0794	98.1793	140.706	114.72	94.8851	279.772	76.7317	293.602	100.491	556.905	121.732	247.521	72.7289	172.295	89.5566	98.6937	95.4793	81.0723	188.189	140.686	130.078	39.8493	77.8044	1054.02	49.1431	52.2016	63.4641	51.7116
H2.09.51	9	16 h at 21°C	1	WT	47.5593	34.3181	290.838	22.0168	138.947	151.081	298.907	70.9117	242.185	79.8266	263.107	182.419	64.7659	109.548	383.067	67.8364	527.11	47.5737	99.488	157.162	116.621	98.7849	393.023	97.2574	258.202	91.2127	557.697	109.179	279.667	76.0389	278.887	93.8301	91.8356	153.297	85.346	225.446	127.833	107.573	55.0822	53.2272	677.293	39.0917	48.9412	64.2477	54.6374
H2.09.53	9	16 h at 21°C	1	WT	44.5056	34.4218	286.512	23.1146	147.108	130.198	288.026	73.7906	254.301	68.253	272.424	184.548	86.1695	110.928	326.335	73.9674	458.7	57.6098	104.383	134.907	113.207	96.5702	319.453	82.8488	287.952	103.462	482.094	132.679	278.021	74.9024	240.41	102.54	92.5663	125.416	84.2601	196.214	175.737	119.992	42.8491	37.0546	655.687	41.3404	51.2564	68.6188	70.4367
H2.09.71	9	16 h at 21°C	1	WT	NA	NA	NA	NA	NA	NA	NA	NA	NA	NA	NA	NA	NA	NA	NA	NA	NA	NA	NA	NA	NA	NA	NA	NA	NA	NA	NA	NA	NA	NA	NA	NA	NA	NA	NA	NA	NA	NA	NA	NA	NA	NA	NA	NA	NA
H3.09.01	9	16 h at 21°C	1	WT	84.5365	40.9826	236.056	20.52	87.4847	113.509	214.108	101.789	301.379	81.9776	346.59	144.803	50.2236	77.2893	401.14	46.4898	502.596	52.2695	77.3813	156.489	97.2391	86.0868	426.018	166.405	271.826	71.7144	594.845	124.436	414.291	63.8675	200.727	95.4025	170.079	178.802	81.8022	315.616	192.93	320.956	46.0393	84.1221	886.499	66.5049	54.6068	50.9646	38.9919
H3.09.05	9	16 h at 21°C	1	WT	81.8324	39.6807	176.126	17.6614	91.6705	107.541	208.044	59.1193	278.634	67.59	304.485	196.042	52.1028	71.3455	389.036	50.178	621.758	49.7941	77.4602	134.907	81.4224	86.4048	369.514	76.4884	310.227	70.548	623.226	133.356	409.927	64.8901	214.626	62.0062	86.9269	191.237	78.5222	269.779	117.897	94.5427	57.8803	110.755	1101.74	52.7503	44.552	53.6038	35.279
H3.09.28	9	16 h at 21°C	1	WT	71.4343	40.5269	360.19	20.3384	89.9788	118.206	197.171	57.6187	240.391	77.3932	301.52	176.236	54.7276	65.0507	343.248	38.8574	589.897	55.8435	76.7174	162.573	79.8194	82.4472	387.161	101.465	256.379	67.0045	549.535	121.361	385.953	58.3696	186.841	83.6611	100.644	215.969	71.7919	247.857	128.581	122.757	36.6404	80.2068	780.637	48.3381	46.5803	55.3986	38.9519
H3.09.29	9	16 h at 21°C	1	WT	98.7007	53.7213	316.055	25.0071	131.648	135.144	235.139	72.1008	278.593	90.996	349.337	293.847	52.4429	84.1572	484.168	64.648	650.91	64.8004	94.6411	188.999	109.482	118.804	351.79	126.201	390.587	87.329	677.249	195.807	374.179	92.7747	230.09	114.989	130.955	191.82	96.7333	460.651	196.336	169.246	45.4104	141.017	1355	75.3828	58.6434	70.6021	51.6539
H3.09.34	9	16 h at 21°C	1	WT	89.8679	50.1031	545.208	24.2538	111.045	130.909	188.288	60.8729	304.627	86.8779	376.653	268.843	68.8121	78.2072	527.499	54.3418	870.189	80.77	118.081	211.507	100.443	116.392	460.188	96.4432	373.666	80.999	762.954	205.045	522.269	74.9427	273.094	93.6026	118.703	257.659	95.9127	402.226	181.208	138.238	57.8074	136.508	1271.65	70.0006	59.4644	68.7652	47.1455
H3.09.45	9	16 h at 21°C	1	WT	97.0444	45.1559	193.049	18.7473	107.749	125.149	220.221	53.218	298.021	80.4377	358.51	284.731	52.1958	97.9937	492.731	64.6828	747.208	64.2543	85.8007	167.309	110.559	99.673	446.96	100.214	323.424	79.3402	611.766	202.272	516.744	93.3201	273.996	100.907	108.556	277.484	98.6376	347.382	153.601	140.042	61.8284	121.98	1412.93	72.8853	52.5313	65.3601	54.3339
H1.10.09	10	12 h at 21°C, 4 h at 45°C	3	WT	53.8072	38.0573	324.452	42.1686	150.051	192.668	503.256	145.512	308.298	118.776	239.857	160.529	91.2419	167.66	580.402	95.6244	291.333	46.3909	111.77	137.711	123.263	101.391	321.44	110.159	390.595	86.0447	386.418	226.698	177.442	91.0201	247.747	97.353	83.8014	69.4938	67.4482	309.634	90.4871	121.753	51.8602	90.052	1143.96	62.9608	44.4909	64.9981	46.9566
H1.10.22	10	12 h at 21°C, 4 h at 45°C	3	WT	60.5901	42.7751	282.904	34.3765	193.672	183.463	496.571	127.654	326.503	96.6415	306.897	260.09	113.816	217.648	557.255	127.486	300.896	75.7082	131.316	169.018	108.534	140.281	311.495	85.3848	394.42	109.173	491.974	140.179	222.941	111.053	199.632	138.673	102.836	90.2031	82.6643	344.598	124.683	130.302	64.5685	97.8235	1110.53	75.4055	56.4862	78.0819	74.2176
H1.10.23	10	12 h at 21°C, 4 h at 45°C	3	WT	74.4241	49.603	373.546	30.9721	206.787	213.223	444.086	112.846	327.327	90.8046	323.49	270.334	107.229	219.159	587.67	127.023	306.01	73.3005	142.743	166.964	128.585	143.721	329.507	101.009	408.193	127.826	530.107	176.478	287.778	117.988	190.94	134.655	106.957	102.166	97.3595	352.827	143.888	139.928	77.8131	106.778	1305.19	76.7198	60.282	94.984	75.4049
H1.10.28	10	12 h at 21°C, 4 h at 45°C	3	WT	66.9006	32.6077	201.465	16.849	154.362	159.247	228.147	63.8518	302.505	75.4269	268.046	164.875	76.0747	158.568	615.293	89.496	238.107	48.2756	95.0882	157.777	111.158	132.608	416.545	76.0891	351.722	85.2751	586.328	122.892	232.079	73.2766	195.314	97.1363	87.2719	109.337	77.5663	372.287	121.526	93.6249	38.6555	94.9688	1393.79	60.1393	49.6618	59.543	56.7719
H1.10.54	10	12 h at 21°C, 4 h at 45°C	3	WT	55.1062	37.8206	228.015	19.5321	163.6	137.486	245.452	62.7283	248.959	85.7059	262.755	197.389	82.0592	209.685	628.733	116.879	270.51	68.2357	98.1005	183.493	103.355	129.349	293.104	84.1704	332.314	96.809	458.83	122.858	245.606	83.3447	178.917	115.551	90.2324	95.77	77.2588	374.22	115.682	121.259	54.4452	96.0642	1173.17	67.6785	51.198	67.2687	59.0613
H1.10.71	10	12 h at 21°C, 4 h at 45°C	3	WT	79.4998	47.7078	411.134	32.094	202.025	224.206	403.019	104.156	358.821	118.27	352.376	228.772	102.342	221.619	669.652	143.526	328.239	63.2154	117.266	179.651	142.472	160.659	401.935	97.0267	342.769	132.54	816.258	160.065	277.517	134.213	225.315	121.464	116.068	105.725	94.3547	452.124	153.555	145.391	55.2927	102.962	1392.16	61.6944	62.4882	83.4754	74.5956
H2.10.08	10	12 h at 21°C, 4 h at 45°C	3	WT	65.6638	43.5226	324.299	27.5396	191.766	219.841	260.719	80.5514	330.956	113.88	364.414	210.501	115.583	246.694	650.871	128.699	348.74	90.8996	139.986	163.67	145.259	166.817	394.604	108.841	339.323	105.772	618.09	168.688	324.062	113.643	234.62	134.419	116.819	117.68	101.074	265.232	171.474	140.373	52.4299	90.1994	1366.63	66.0746	67.4696	84.0389	58.675
H2.10.14	10	12 h at 21°C, 4 h at 45°C	3	WT	78.652	49.6463	390.535	28.3517	196.583	201.478	354.374	80.0447	371.688	118.145	409.818	282.781	130.879	250.3	687.575	161.799	492.538	80.7756	133.437	205.691	172.623	179.539	456.42	107.286	407.879	111.411	777.878	181.273	411.955	127.503	322.085	125.235	124.161	150.332	108.673	335.894	179.983	134.165	71.2914	110.764	1753.44	86.1318	64.9866	89.442	88.4497
H2.10.24	10	12 h at 21°C, 4 h at 45°C	3	WT	67.8033	40.5135	332.446	23.0428	147.085	178.121	321.805	94.6049	324.938	89.5896	372.63	229.548	93.623	240.26	570.891	139.891	488.071	70.9851	125.291	189.47	132.289	144.655	422.275	123.92	312.075	107.928	842.81	154.282	370.966	101.429	233.644	108.156	127.788	141.2	97.7683	244.044	137.048	145.292	52.9629	87.9763	1361.19	71.007	59.6384	71.9095	79.8201
H2.10.51	10	12 h at 21°C, 4 h at 45°C	3	WT	55.8787	47.7082	327.676	22.0616	164.39	160.957	259.502	67.4261	305.709	98.4435	366.432	253.127	120.322	242.057	503.868	155.299	406.602	51.6925	128.955	166.44	138.538	143.784	348.447	106.546	330.729	101.83	631.878	151.973	294.543	91.2575	184.659	99.9082	112.47	118.026	93.6695	250.292	155.408	127.417	58.3569	86.1425	1202.45	67.9476	57.9571	87.177	59.6857
H2.10.53	10	12 h at 21°C, 4 h at 45°C	3	WT	65.6561	40.0311	482.75	21.1559	173.539	166.53	306.493	60.5696	332.818	90.2802	386.805	275.53	126.227	245.253	562.026	153.258	437.417	50.81	110.136	178.001	140.106	149.878	421.339	80.3813	340.373	110.854	764.085	142.653	306.444	84.972	238.06	96.4859	106.343	122.286	90.3367	283.574	186.18	129.604	42.1424	96.4678	1382.68	78.4981	57.0779	81.7329	68.3389
H2.10.71	10	12 h at 21°C, 4 h at 45°C	3	WT	70.975	43.9662	372.382	24.0386	178.036	180.705	315.982	87.5893	344.716	96.6845	432.385	262.397	115.305	246.255	647.686	145.815	378.115	73.4263	130.37	166.713	137.052	161.614	404.216	162.665	362.349	139.11	747.536	175.748	314.107	107.679	193.254	152.399	166.722	113.6	100.19	327.821	182.823	212.944	64.1945	105.044	1619.76	77.6365	58.1875	83.7963	63.204
H3.10.01	10	12 h at 21°C, 4 h at 45°C	3	WT	98.4196	56.6462	655.195	38.0929	241.576	221.715	326.687	103.745	480.36	212.177	438.364	468.651	103.74	191.532	842.609	134.672	785.326	91.1176	176.955	258.118	214.272	190.057	938.325	146.268	495.26	120.529	852.123	403.52	394.431	135.22	343.862	131.858	161.202	240.922	150.014	1245.18	189.825	182.905	89.6628	109.644	1194.36	80.1108	70.8262	89.4702	65.864
H3.10.05	10	12 h at 21°C, 4 h at 45°C	3	WT	56.0699	39.1095	494.781	26.6349	222.368	164.993	287.333	57.9581	357.333	215.24	326.3	389.065	102.524	257.765	673.692	152.456	660.954	58.6859	127.33	239.32	181.871	166.687	568.582	109.567	351.489	105.069	798.42	434.414	401.874	113.734	350.505	100.86	114.977	184.169	109.946	748.281	159.928	129.027	67.0162	83.0942	769.6	62.3314	60.1363	81.3455	75.6425
H3.10.28	10	12 h at 21°C, 4 h at 45°C	3	WT	61.9458	39.2492	283.574	24.4019	159.504	152.755	383.281	86.3515	335.554	108.509	302.037	347.183	94.0611	237.369	648.664	144.307	693.397	46.0246	99.0637	154.016	145.14	157.938	523.927	104.799	299.591	111.708	756.49	189.974	348.511	95.948	234.333	75.5423	106.204	186.654	94.0379	550.393	140.301	131.78	58.2346	80.7967	794.434	74.4976	60.2288	75.4293	92.496
H3.10.29	10	12 h at 21°C, 4 h at 45°C	3	WT	49.7927	35.729	191.709	19.9594	155.589	162.476	308.484	74.9547	425.153	115.849	325.188	419.679	100.114	232.82	686.906	141.743	732.841	50.7928	93.7424	174.466	125.132	158.158	706.642	93.467	322.751	94.4382	838.093	238.943	424.753	95.5981	288.277	73.7031	115.987	208.467	92.9796	665.641	139.935	115.927	52.9895	96.404	949.609	74.0583	56.696	69.0649	75.8398
H3.10.34	10	12 h at 21°C, 4 h at 45°C	3	WT	71.2418	45.6302	599.41	28.5583	249.734	190.047	325.461	92.6375	454.193	227.887	416.237	505.711	137.452	351.153	780.197	209.989	661.387	74.166	177.019	279.33	181.171	203.408	685.182	166.869	435.113	124.832	949.986	468.521	460.318	140.568	373.251	95.1478	163.084	190.285	114.824	725.59	179.468	222.042	78.369	101.158	993.836	84.7377	74.4154	89.3575	101.109
H3.10.45	10	12 h at 21°C, 4 h at 45°C	3	WT	55.9933	42.5893	271.365	24.3114	211.496	172.259	417.014	93.994	411.425	199.68	371.624	424.329	110.349	281.964	798.962	173.765	841.477	72.4635	126.89	196.005	168.317	171.379	642.929	143.352	454.111	120.729	937.436	368.691	405.027	118.025	373.721	92.9325	162.845	213.506	103.006	695.235	182.305	201.419	71.9271	92.7054	932.452	78.9663	68.7799	79.8766	80.0392
H1.11.09	11	12 h at 38°C, 4 h at 45°C	2	WT	48.893	22.8708	162.726	10.9259	91.1615	136.947	173.009	55.1531	174.481	218.098	178.222	105.931	28.8367	95.4566	379.701	34.8611	147.862	23.0511	60.0541	91.0315	89.911	133.764	585.178	47.9916	180.048	51.6124	479.854	79.5568	148.978	44.6554	88.9584	60.6091	47.2904	108.687	61.8628	697.46	76.3037	72.6714	35.5802	53.6589	789.626	27.51	24.5955	33.7111	18.4417
H1.11.22	11	12 h at 38°C, 4 h at 45°C	2	WT	54.6745	22.7554	223.027	14.2998	102.871	154.135	217.088	65.2631	221.372	207.058	204.309	121.995	28.3954	112.714	546.144	29.4073	212.813	28.4051	69.6593	132.686	105.844	146.149	790.518	60.065	241.576	49.0393	775.727	90.7954	153.926	54.529	140.56	45.5011	58.046	153.904	59.0094	936.315	73.878	77.7389	32.4326	68.8489	1132.89	21.5547	28.8287	35.4298	25.0502
H1.11.23	11	12 h at 38°C, 4 h at 45°C	2	WT	56.5847	25.8468	178.849	13.464	93.136	128.201	174.741	50.6438	212.906	181.227	219.045	131.742	33.2492	89.2293	513.842	34.504	211.686	26.6343	62.4031	120.492	111.628	144.319	861.503	50.2356	188.014	51.4894	669.91	85.8615	167.444	56.5944	125.629	75.8807	50.2535	146.501	58.1483	977.464	77.7767	79.6604	37.1255	60.7062	940.508	33.3787	33.1219	39.0898	25.2199
H1.11.28	11	12 h at 38°C, 4 h at 45°C	2	WT	49.8144	23.5898	211.989	10.2052	101.018	167.247	198.546	50.1072	207.429	193.646	203.886	85.4963	30.3733	74.0732	429.325	26.9322	155.389	21.9458	49.6565	104.072	75.6643	129.588	664.942	38.6073	230.294	48.6978	617.777	83.4225	135.495	53.6973	102.195	46.6363	46.9832	106.992	59.667	709.346	68.8505	79.5812	32.5706	54.6885	1007.22	24.7836	24.7392	31.8953	26.6335
H1.11.54	11	12 h at 38°C, 4 h at 45°C	2	WT	50.7017	26.4665	179.055	17.468	90.343	139.786	160.556	80.3765	184.68	209.788	200.889	102.738	40.3305	85.029	430.81	43.2432	122.012	30.5849	60.908	72.7919	96.3998	134.623	587.888	51.8945	213.35	58.611	386.33	75.5983	109.254	67.5935	88.5502	45.4945	51.6916	100.404	60.2644	776.541	60.0373	68.6497	38.4349	53.4582	765.686	18.6913	26.5171	42.9367	28.1892
H1.11.71	11	12 h at 38°C, 4 h at 45°C	2	WT	54.1875	25.0577	250.978	15.3753	98.0402	144.236	201.363	67.448	186.672	199.356	215.93	117.266	34.9736	86.3919	439.088	40.7859	129.794	27.9469	58.6907	77.0804	109.491	152.46	620.187	75.3426	174.965	45.7883	512.298	90.4993	130.827	53.6778	88.269	62.715	66.8606	112.149	61.9413	798.096	68.6171	91.35	32.5178	55.1706	734.85	32.2588	29.9303	38.2471	31.7405
H2.11.08	11	12 h at 38°C, 4 h at 45°C	2	WT	59.2317	37.5032	389.162	29.9121	155.273	178.974	469.558	75.0838	324.716	170.069	334.036	196.592	88.6105	172.586	603.287	98.4597	459.66	49.4774	109.362	182.485	116.079	187.272	537.206	78.4231	355.597	87.1416	768.76	146.432	268.219	92.9482	222.815	99.0186	95.4578	148.622	77.5825	486.802	135.702	111.963	57.8439	72.7918	1036.79	61.2587	46.7811	61.3843	57.7528
H2.11.14	11	12 h at 38°C, 4 h at 45°C	2	WT	48.4145	34.2093	294.629	18.8831	161.742	138.843	305.672	60.4228	294.147	186.61	321.874	223.268	88.5963	161.423	536.078	103.096	548.127	49.1961	105.283	161.53	126.187	170.454	544.872	95.9772	332.841	92.253	656.956	219.348	319.197	91.4724	284.639	102.672	94.4802	179.572	81.7436	433.645	142.333	110.115	50.1769	57.5305	964.503	57.4334	49.0765	62.0792	59.1572
H2.11.24	11	12 h at 38°C, 4 h at 45°C	2	WT	74.6975	44.0552	321.274	20.6931	181.614	175.48	322.286	78.6618	305.46	203.563	369.302	260.747	94.2514	173.944	647.709	101.328	485.982	66.2734	107.996	161.753	154.335	217.252	448.224	86.0464	450.681	105.54	688.839	154.106	272.29	106.657	192.559	102.382	97.5263	135.189	93.7488	496.182	146.079	123.814	57.3442	100.406	1455.27	76.8142	51.5978	73.5895	69.1203
H2.11.51	11	12 h at 38°C, 4 h at 45°C	2	WT	44.3368	31.9894	306.044	41.6395	142.504	150.29	574.011	98.7779	291.128	149.277	329.297	211.413	66.5516	127.129	577.449	96.5437	587.434	51.178	117.293	181.49	135.636	143.382	607.267	114.766	327.264	86.3032	679.301	158.473	292.346	84.603	307.918	79.8367	106.945	154.374	83.057	564.9	138.379	143.357	55.336	67.5231	1124.11	70.2318	48.0906	59.9073	58.4715
H2.11.53	11	12 h at 38°C, 4 h at 45°C	2	WT	NA	NA	NA	NA	NA	NA	NA	NA	NA	NA	NA	NA	NA	NA	NA	NA	NA	NA	NA	NA	NA	NA	NA	NA	NA	NA	NA	NA	NA	NA	NA	NA	NA	NA	NA	NA	NA	NA	NA	NA	NA	NA	NA	NA	NA
H2.11.71	11	12 h at 38°C, 4 h at 45°C	2	WT	53.5413	33.1381	324.951	25.8809	200.293	177.992	479.31	66.5747	368.842	203.694	388.967	303.744	98.9834	218.251	638.475	116.555	383.199	60.7301	120.666	203.532	142.753	216.962	570.3	138.141	362.445	92.2319	776.911	220.298	261.988	97.0201	271.346	115.849	124.472	123.008	88.5838	600.651	142.568	141.284	43.5073	75.0942	1181.51	76.0585	50.1842	70.5753	55.5055
H3.11.01	11	12 h at 38°C, 4 h at 45°C	2	WT	82.5459	54.0548	282.281	39.4047	455.866	240.053	723.739	151.938	548.4	675.254	583.323	663.894	133.9	285.892	1073.34	225.478	1014.52	114.196	198.199	270.348	322.095	253.823	1133.21	198.072	834.46	152.498	1211.41	1465.7	717.782	170.88	1127.57	155.547	225.291	260.826	166.18	1503.8	201.245	291.536	103.567	151.175	1403.14	116.429	92.3686	98.0526	101.069
H3.11.05	11	12 h at 38°C, 4 h at 45°C	2	WT	56.7409	41.8354	499.177	63.9319	2053.26	204.285	2539.75	243.822	515.546	3280.14	1003.25	539.254	135.408	526.91	1100.42	199.98	872.654	106.359	509.905	533.97	1358.6	238.699	1530.44	141.64	567.396	162.413	908.428	11684.5	3020.28	264.947	6009.31	139.059	228.581	213.191	125.021	1288.25	162.561	161.086	127.945	162.812	944.457	147.963	82.4924	95.7431	109.038
H3.11.28	11	12 h at 38°C, 4 h at 45°C	2	WT	76.6749	51.0353	272.734	52.9061	207.752	194.46	835.008	186.214	480.062	339.309	399.337	567.035	132.456	314.076	980.614	209.689	908.719	95.7282	237.457	275.616	201.67	250.304	834.214	129.718	633.795	139.2	1012.15	313.365	409.123	151.413	345.054	117.752	138.185	234.37	143.523	1184.73	173.281	150.541	81.0279	125.853	1166.88	131.251	90.8687	100.83	111.11
H3.11.29	11	12 h at 38°C, 4 h at 45°C	2	WT	58.932	36.846	182.484	53.4317	181.441	163.555	1076.67	208.672	428.604	351.046	376.274	426.587	101.62	222.014	794.549	152.933	838.425	80.164	221.841	186.256	157.733	206.73	765.792	100.921	555.504	108.859	922.755	347.047	387.74	119.02	364.572	84.7018	125.36	175.508	104.534	1136.78	152.75	127.597	93.3562	125.051	1235.5	114.29	67.425	68.9702	99.0589
H3.11.34	11	12 h at 38°C, 4 h at 45°C	2	WT	50.8227	32.2074	188.432	20.1893	161.01	152.057	238.652	62.1573	376.095	241.092	352.47	507.884	103.884	263.342	720.601	150.654	759.437	66.6659	97.1336	170.628	142.09	208.245	796.663	104.373	447.756	101.767	967.957	220.276	407.815	108.017	241.632	74.3234	104.651	206.057	110.921	1114	160.633	142.808	56.9269	79.5175	885.054	51.0308	64.6127	76.1514	75.6176
H3.11.45	11	12 h at 38°C, 4 h at 45°C	2	WT	53.3738	38.8203	221.06	26.6743	209.173	159.952	623.012	112.319	369.712	323.115	358.442	472.114	98.4448	267.722	805.212	155.59	810.057	75.3673	131.209	217.698	163.806	191.36	733.834	107.927	506.577	107.934	936.465	362.263	379.254	114.626	368.534	95.9268	115.237	213.035	105.599	1166.68	171.104	116.081	70.2565	100.101	922.515	83.5624	71.4318	71.0337	82.3622
H1.12.09	12	17 h at 21°C	1	WT	100.451	54.873	448.419	39.1313	184.272	239.987	341.013	134.697	327.31	92.9642	375.718	209.18	102.512	137.813	383.769	113.603	431.844	78.5692	142.23	205.384	185.689	128.19	338.149	115.162	325.827	144.89	523.678	159.219	236.404	94.6419	244.803	159.34	137.391	109.542	109.103	215.799	144.174	151.301	76.3504	126.232	2065.37	86.1953	62.5136	82.0128	81.4656
H1.12.22	12	17 h at 21°C	1	WT	69.6709	41.4984	383.832	22.7801	147.642	189.664	277.598	57.598	238.788	73.7507	304.882	182.415	65.4742	92.3893	357.691	58.5537	401.203	60.1781	81.3026	129.25	99.836	105.285	302.914	86.6001	306.409	105.705	661.374	122.821	273.657	83.5444	173.938	92.1846	112.975	117.362	79.7457	190.678	123.329	135.322	57.0993	105.412	1503.45	60.2519	43.6173	66.4817	57.0355
H1.12.23	12	17 h at 21°C	1	WT	96.1437	60.5369	419.922	39.6693	247.152	268.372	350.174	147.981	365.803	114.346	435.986	279.619	140.157	177.446	418.925	146.236	405.075	119.752	176.452	202.454	206.713	162.267	356.168	167.503	385.749	180.624	605.931	246.019	366.133	139.761	242.154	173.902	171.828	155.899	144.325	265.396	210.521	201.447	102.223	158.355	1490.18	100.295	112.395	106.27	109.65
H1.12.28	12	17 h at 21°C	1	WT	60.8995	30.435	204.308	15.7345	101.31	138.601	217.17	57.8652	184.721	94.1202	217.291	85.6775	42.0405	63.1735	265.08	47.9155	161.992	31.2926	61.6976	101.609	71.4354	94.3068	223.437	42.6475	196.573	61.1653	384.63	95.9214	190.792	62.633	135.58	78.4156	58.4731	71.8256	57.5934	213.599	88.9496	74.7282	37.6501	62.3195	1027.22	46.4843	41.0947	48.3798	35.64
H1.12.54	12	17 h at 21°C	1	WT	51.9968	29.5341	245.297	14.6259	79.4035	164.891	218.649	51.638	190.913	61.3284	206.377	88.6434	39.2531	46.3112	241.781	27.7572	193.733	17.0321	50.5248	82.5546	44.1284	84.2716	263.758	54.8854	145.032	58.5787	500.457	88.2899	187.192	44.9718	135.57	64.4319	52.5691	82.1142	58.0291	167.392	83.9242	72.9128	21.8435	47.3433	809.88	34.8401	27.1084	38.4896	24.5783
H1.12.71	12	17 h at 21°C	1	WT	59.2206	35.3072	290.008	17.1986	128.382	164.502	232.545	51.6011	204.832	65.8757	269.006	141.54	54.6891	77.6288	310.964	55.2289	231.874	39.0959	82.6917	126.885	110.867	83.2032	231.085	92.9182	259.595	85.7566	453.75	123.152	242.301	60.2786	158.984	96.1734	94.5369	95.3507	65.8998	161.061	129.828	116.925	62.1582	66.5412	1066.6	48.7094	35.8364	54.5589	40.3216
H2.12.08	12	17 h at 21°C	1	WT	58.6001	47.4847	356.788	22.1577	179.55	225.24	315.355	99.1007	354.922	85.714	388.202	247.318	86.6605	157.375	412.923	90.7501	428.417	58.8484	133.855	200.474	137.893	129.013	353.587	126.76	299.862	114.329	775.786	153.522	266.887	97.8635	254.839	126.729	125.204	114.487	98.4222	251.622	149.048	166.814	65.1517	88.6943	1356.93	62.071	53.0466	82.5417	67.4906
H2.12.14	12	17 h at 21°C	1	WT	62.5895	43.4756	827.386	25.3694	175.419	174.172	308.204	73.1469	333.862	83.217	365.07	258.494	78.9027	161.101	427.934	87.5439	515.577	56.3741	144.136	216.342	138.837	112.152	434.721	103.989	341.172	121.296	857.43	155.653	390.966	103.598	282.858	109.326	105.203	151.947	91.2338	310.247	204.146	143.898	63.3026	84.7509	1252.22	66.2469	63.6537	79.9594	87.7864
H2.12.24	12	17 h at 21°C	1	WT	111.293	56.5702	471.505	26.1001	191.229	280.091	403.094	101.367	515.031	104.629	418.076	360.892	170.361	146.526	761.529	118.048	314.199	67.708	127.134	775.021	120.688	129.196	358.313	102.781	386.466	120.644	912.308	150.383	278.456	102.938	198.373	134.687	105.563	114.926	107.698	267.765	153.382	115.875	53.5275	111.468	1780.93	64.5412	65.9761	83.8353	94.1864
H2.12.51	12	17 h at 21°C	1	WT	49.6055	33.5907	323.044	19.4949	139.119	139.669	292.842	60.2478	276.167	63.8816	327.642	178.033	70.353	107.859	366.759	65.9949	363.965	45.8213	98.7215	154.818	126.844	109.757	319.075	126.365	295.046	105.364	673.041	128.294	255.421	81.947	198.209	103.03	117.819	96.3581	83.0457	245.868	144.947	154.505	72.9261	61.1223	946.209	55.2118	48.3522	65.2754	61.3626
H2.12.53	12	17 h at 21°C	1	WT	51.9621	35.5979	389.899	22.8327	154.069	167.499	344.734	77.8775	327.82	76.3346	388.344	233.816	70.6652	128.576	400.463	69.1452	416.315	68.029	102.884	174.529	134.432	114.005	406.854	129.542	360.419	116.69	908.625	145.745	305.249	90.1663	244.875	128.275	118.737	108.311	94.8971	259.532	147.408	143.927	73.4081	82.3694	1195.25	59.5046	57.8195	80.2467	67.7166
H2.12.71	12	17 h at 21°C	1	WT	99.7817	57.1484	367.628	28.107	198.509	257.145	391.627	97.7944	424.617	107.146	494.781	312.85	124.777	161.86	596.419	118.852	396.379	67.467	133.643	418.523	148.801	135.97	411.806	146.134	478.073	136.315	974.078	184.216	356.035	128.128	256.292	162.408	155.018	120.367	126.393	327.395	164.958	195.691	75.6617	124.806	1775.56	87.9592	77.197	97.0396	89.468
H3.12.01	12	17 h at 21°C	1	WT	88.6496	44.2725	183.72	17.7746	116.699	142.517	243.833	71.8862	271.578	76.7619	290.455	215.291	50.0576	81.6822	434.301	65.6432	391.05	53.7065	78.7091	152.512	101.47	92.931	289.623	85.076	299.919	79.0173	576.299	118.008	324.78	65.1251	178.321	74.343	100.849	109.76	75.7286	299.171	167.996	150.804	48.7129	95.1918	1102.8	55.8119	51.9157	57.7995	36.2843
H3.12.05	12	17 h at 21°C	1	WT	93.8393	44.4224	190.479	21.1469	126.813	145.493	243.181	68.9618	277.031	87.4426	324.987	260.124	64.7506	101.37	489.645	66.5489	555.505	55.991	82.7421	156.008	97.059	99.3417	373.516	100.779	330.409	86.4462	631.772	131.255	340.737	77.1746	203.499	83.9115	103.892	121.531	83.3805	350.427	189.347	146.237	34.8884	117.839	1393.5	59.9455	53.2433	64.4392	45.4634
H3.12.28	12	17 h at 21°C	1	WT	86.7481	57.0451	263.674	26.0783	141.89	163.496	247.177	87.0716	356.933	96.5844	380.35	262.51	76.5489	99.9871	437.872	72.4336	472.046	58.2227	101.474	202.38	104.974	118.126	406.761	144.025	451.61	96.79	682.205	158.596	364.633	97.7769	226.667	108.001	118.556	132.607	94.6602	389.887	187.45	186.462	61.346	103.12	1182.35	73.0639	69.7149	72.8371	64.3868
H3.12.29	12	17 h at 21°C	1	WT	79.0549	46.2147	203.389	19.4724	121.391	145.039	209.815	62.0774	329.85	82.0383	324.464	213.032	63.8417	120.798	416.01	61.8328	440.939	72.5728	82.357	191.661	92.0769	98.2251	345.164	91.176	362.859	77.9567	638.75	148.467	345.7	77.1544	187.321	96.7744	93.826	115.275	83.326	308.971	150.172	120.962	42.1151	119.621	1233.67	56.9363	54.9956	57.8137	51.8458
H3.12.34	12	17 h at 21°C	1	WT	78.5878	42.4064	273.221	17.9369	106.759	115.356	212.671	45.2135	227.517	67.3571	262.306	209.1	44.8705	88.4952	355.837	55.4069	346.709	51.7124	88.2579	173.744	79.1571	82.1053	261.311	61.71	325.344	67.0885	448.822	107.486	249.171	68.0865	151.474	69.4512	71.5691	93.6051	61.9937	295.736	115.935	88.0598	40.6082	110.405	1126.79	51.1814	39.9716	51.0338	42.3608
H3.12.45	12	17 h at 21°C	1	WT	93.7566	48.6369	216.339	20.625	127.112	141.934	241.644	71.5502	310.873	90.333	348.541	289.567	54.7553	87.3004	446.704	63.0183	503.388	67.6409	87.9004	170.206	107.367	102.856	366.599	106.62	376.965	87.1067	639.813	132.809	346.188	82.437	181.172	98.5351	107.529	125.094	83.6253	363.573	177.57	164.08	58.4986	113.235	1319.41	56.5065	55.0498	58.499	55.2565
H1.13.09	13	12 h at 21°C, 4 h at 45°C, 1 h at 21°C	3	WT	71.106	56.4858	356.719	41.8143	229.384	229.477	417.275	99.0757	330.745	132.708	353.151	186.369	121.617	182.631	510.604	124.73	354.818	84.7272	155.257	191.879	180.834	148.708	326.257	115.264	389.537	162.578	584.551	179.184	273.535	140.65	223.161	159.803	149.974	119.908	111.239	333.436	178.357	181.157	100.163	115.656	1392	74.6989	82.8102	99.5595	97.3996
H1.13.22	13	12 h at 21°C, 4 h at 45°C, 1 h at 21°C	3	WT	50.2097	31.323	301.754	20.303	152.162	166.072	355.493	78.5118	228.2	104.583	290.377	169.963	69.8524	105.008	598.874	70.1458	279.138	39.6003	72.2193	132.365	132.115	104.578	306.238	74.0989	351.472	103.802	598.593	145.809	247.476	76.0576	177.49	97.1485	93.4957	99.998	69.107	256.038	114.882	102.348	35.7317	82.7204	1328.72	55.5023	40.9255	68.057	59.3092
H1.13.23	13	12 h at 21°C, 4 h at 45°C, 1 h at 21°C	3	WT	56.7002	35.8743	339.665	19.6563	156.933	170.164	346.204	42.7326	244.689	99.1315	301.701	130.993	79.2997	115.449	504.211	80.9662	245.828	42.1713	92.0543	130.267	119.071	95.3052	319.054	69.6154	374.262	98.1395	766.014	126.577	249.844	98.9902	183.012	76.8114	97.5299	98.7507	74.0991	262.565	131.745	96.8824	43.4122	73.6415	1261.82	42.4663	47.2592	62.6929	51.7482
H1.13.28	13	12 h at 21°C, 4 h at 45°C, 1 h at 21°C	3	WT	67.7285	42.9139	874.215	32.3761	163.437	181.459	392.832	83.3189	269.125	108.597	315.482	148.94	73.3698	147.568	623.849	90.5992	292.008	55.3554	99.553	145.279	125.35	117.037	364.881	93.8175	414.589	129.12	638.085	135.016	270.299	90.3597	181.068	110.082	111.556	121.447	75.7552	311.464	142.844	120.632	48.9733	112.525	1550.2	79.4598	57.2822	79.9296	54.7435
H1.13.54	13	12 h at 21°C, 4 h at 45°C, 1 h at 21°C	3	WT	49.8778	32.5763	296.306	18.8416	152.363	156.421	294.105	43.2864	243.534	100.483	258.75	172.997	72.0231	137.348	544.687	82.009	231.228	41.3854	91.8051	140.526	111.439	93.1838	311.718	98.5141	410.418	112.748	543.444	117.714	243.261	86.2524	166.46	119.36	104.233	94.1277	70.2593	240.066	126.935	148.809	37.0724	89.8458	1266.66	53.0507	42.4075	67.6686	61.0466
H1.13.71	13	12 h at 21°C, 4 h at 45°C, 1 h at 21°C	3	WT	111.988	126.792	484.231	76.6241	344.558	373.399	633.568	183.067	491.561	198.917	559.801	445.846	196.404	247.604	891.438	228.091	482.811	152.221	233.158	287.017	249.276	232.823	621.799	221.945	677.66	360.929	959.314	303.802	316.363	224.591	315.417	243.702	238.833	217.736	210.832	488.198	228.351	307.347	122.857	187.488	2028.67	120.208	139.243	213.237	148.272
H2.13.08	13	12 h at 21°C, 4 h at 45°C, 1 h at 21°C	3	WT	83.9297	45.0529	299.146	25.642	207.947	238.686	325.82	95.4554	371.764	126.719	369.452	211.7	84.2823	191.049	623.186	109.88	378.941	66.7176	145.181	213.265	162.697	127.168	433.191	119.312	367.397	112.653	689.473	155.536	312.47	93.9758	219.399	122.802	115.747	121.802	97.9117	313.428	162.121	135.415	61.0863	91.0949	1359.81	60.6025	60.6035	73.8476	53.8051
H2.13.14	13	12 h at 21°C, 4 h at 45°C, 1 h at 21°C	3	WT	70.6252	38.8772	265.139	21.8412	173.872	177.847	307.426	67.0572	317.641	92.9104	359.336	234.345	69.6944	157.739	570.602	92.7582	487.999	59.0005	110.572	178.178	128.064	119.364	409.728	117.055	304.176	102.265	735.217	140.65	360.563	80.8414	254.693	116.617	120.3	140.795	97.3781	261.431	139.81	134.569	72.7661	88.4953	1224.72	56.4496	64.7122	77.9998	63.5044
H2.13.24	13	12 h at 21°C, 4 h at 45°C, 1 h at 21°C	3	WT	53.7468	40.8167	390.655	26.6335	186.193	168.364	353.166	80.3851	326.076	93.0561	347.346	269.075	95.5308	133.531	507.223	91.7452	490.166	61.0668	113.987	188.958	122.093	131.148	376.24	140.922	371.15	121.952	746.284	146.192	304.375	100.949	264.96	113.84	121.393	129.088	98.1744	282.675	174.616	160.893	64.8806	73.8473	1070.77	65.0352	58.4238	81.3266	75.2711
H2.13.51	13	12 h at 21°C, 4 h at 45°C, 1 h at 21°C	3	WT	69.7692	48.1966	508.087	25.0378	235.119	282.665	333.255	107.188	376.167	116.763	425.039	242.779	119.784	195.845	589.563	141.966	439.277	71.3372	149.431	175.467	156.548	153.915	417.952	160.235	362.152	129.327	590.703	207.377	269.457	111.685	262.196	169.798	147.213	137.923	113.14	242.051	176.852	172.32	63.6802	95.1154	1672.99	72.5049	62.4281	103.951	63.9403
H2.13.53	13	12 h at 21°C, 4 h at 45°C, 1 h at 21°C	3	WT	77.5533	47.781	553.539	26.2262	222.687	294.794	329.537	104.988	381.664	127.451	437.508	261.298	118.32	198.969	614.947	136.31	487.58	81.9597	164.256	188.492	156.422	153.689	467.194	141.619	380.334	129.774	599.39	221.811	291.729	116.983	354.569	195.517	131.548	149.429	107.911	322.184	206.707	158.453	67.2601	103.314	1770.53	77.5976	62.5225	102.469	61.3469
H2.13.71	13	12 h at 21°C, 4 h at 45°C, 1 h at 21°C	3	WT	69.0909	46.8118	528.451	22.8792	212.43	246.315	302.691	108.574	362.927	116.579	404.865	266.987	110.163	202.097	590.836	124.839	378.597	68.0426	150.969	205.711	144.621	148.683	345.794	104.327	389.415	137.338	612.045	197.177	238.308	101.767	219.82	149.952	115.91	114.017	111.18	261.587	189.236	145.996	65.5032	85.5521	1511.33	75.9281	64.9825	88.9116	63.5477
H3.13.01	13	12 h at 21°C, 4 h at 45°C, 1 h at 21°C	3	WT	49.2701	37.3831	203.842	25.7994	141.656	132.255	247.341	73.3426	343.976	109.868	282.931	344.767	84.8908	230.669	560.467	125.143	670.653	66.3429	96.7793	145.377	119.22	133.789	666.782	84.4	359.884	88.4063	688.934	169.717	345.628	84.9945	241.8	83.4951	102.377	193.226	86.0001	743.172	127.234	105.992	59.3752	68.3239	723.131	57.9036	56.8158	61.6224	61.0618
H3.13.05	13	12 h at 21°C, 4 h at 45°C, 1 h at 21°C	3	WT	43.8303	34.5954	211.495	21.3182	126.918	118.715	222.212	47.2911	254.857	112.113	258.513	278.271	82.9864	196.799	511.699	96.3566	610.484	51.3271	89.9358	165.332	99.4271	119.838	530.798	90.063	315.928	84.7385	655.123	146.008	303.991	77.9998	201.173	61.5869	93.8186	189.131	84.679	578.651	142.22	134.728	58.4264	69.6512	578.884	57.3332	50.2568	57.0949	57.2814
H3.13.28	13	12 h at 21°C, 4 h at 45°C, 1 h at 21°C	3	WT	50.3909	35.3676	209.73	33.9234	134.492	129.281	398.521	103.457	306.891	126.648	282.901	262.77	79.4392	161.974	585.263	102.921	821.517	64.2154	124.994	175.1	111.445	125.05	504.491	117.126	354.569	81.911	652.632	179.205	386.363	96.2816	249.572	78.6944	110.286	225.238	85.9952	505.405	142.899	141.05	83.0049	81.5441	732.779	66.4197	55.0971	62.2911	63.6781
H3.13.29	13	12 h at 21°C, 4 h at 45°C, 1 h at 21°C	3	WT	48.5183	36.0639	258.649	22.6596	124.503	122.357	246.208	84.9442	264.666	101.277	264.294	251.492	70.0818	132.98	556	85.9012	711.927	56.5707	90.7692	186.132	106.908	119.993	435.415	126.792	342.133	83.5234	671.812	149.402	351.08	86.5205	210.51	72.9021	111.899	207.618	83.5341	389.483	153.775	177.046	49.4578	60.3379	628.941	49.881	48.8029	54.1063	55.1848
H3.13.34	13	12 h at 21°C, 4 h at 45°C, 1 h at 21°C	3	WT	44.3085	31.4795	227.239	17.5366	117.7	112.732	229.998	60.3836	234.153	93.3588	239.344	219.369	56.9172	150.838	453.74	75.9999	633.213	54.7071	78.5036	137.712	89.881	105.016	378.247	108.259	323.32	74.4429	614.633	128.891	283.176	74.8957	205.445	72.757	102.492	172.962	74.9889	371.013	146.063	153.046	55.6126	60.1101	538.698	48.1527	45.1607	53.2429	48.3573
H3.13.45	13	12 h at 21°C, 4 h at 45°C, 1 h at 21°C	3	WT	49.0578	40.7392	516.867	23.254	132.217	146.184	232.805	77.8381	314.904	113.95	314.579	292.226	77.713	133.352	523.076	78.7339	584.828	67.4789	108.493	194.474	122.557	130.755	572.425	111.466	349.227	84.4648	829.099	162.73	365.653	104.565	229.711	81.072	110.871	171.343	92.4828	506.616	147.729	147.732	58.5194	78.3601	700.335	58.7697	52.075	61.5036	62.6897
H1.14.09	14	12 h at 38°C, 4 h at 45°C, 1 h at 21°C	2	WT	53.6471	40.1707	189.042	24.3994	152.116	169.944	289.15	64.7306	292.847	193.464	252.232	187.847	80.6721	131.328	660.642	71.12	302.7	41.6685	81.7426	153.78	145.022	155.115	608.681	112.198	346.894	121.162	533.773	153.287	279.449	89.6277	215.021	96.9266	118.742	201.107	73.9002	670.732	160.026	147.367	52.3899	98.9832	1079.18	54.0027	49.4298	63.1594	51.7257
H1.14.22	14	12 h at 38°C, 4 h at 45°C, 1 h at 21°C	2	WT	50.605	32.9896	218.906	11.8613	116.191	153.208	213.385	52.2311	240.558	160.846	255.017	174.839	62.116	122.109	626.961	61.6055	243.46	33.82	70.0173	114.331	107.302	129.552	635.129	97.2361	303.771	77.1929	592.085	133.517	269.184	86.4837	137.165	109.573	95.6452	188.401	70.5373	652.704	143.076	136.867	55.4506	84.0018	1176.43	42.4407	42.9813	52.8524	43.9737
H1.14.23	14	12 h at 38°C, 4 h at 45°C, 1 h at 21°C	2	WT	52.2148	32.3113	215.222	24.5597	149.296	141.467	249.845	53.5663	276.962	182.481	266.618	212.669	52.5412	132.961	522.364	76.0886	379.191	52.494	89.1843	118.694	138.137	156.071	514.543	148.315	368.964	101.642	630.422	142.9	282.051	102.847	174.794	125.746	154.886	217.192	87.2825	720.816	153.916	195.035	61.6697	96.2007	1349.76	51.6998	48.5483	60.1	63.3155
H1.14.28	14	12 h at 38°C, 4 h at 45°C, 1 h at 21°C	2	WT	46.9159	30.9112	194.505	17.8049	135.718	121.723	215.407	42.2452	241.303	174.857	238.979	191.934	39.3489	91.5495	409.538	61.6335	271.48	37.5309	76.854	122.353	101.015	115.814	333.192	69.5794	303.597	86.7913	517.867	107.314	248.37	73.3016	169.774	99.9633	76.6868	131.687	65.4908	356.534	107.216	99.3603	23.7222	72.7766	1025.55	35.1065	37.175	54.8915	48.9543
H1.14.54	14	12 h at 38°C, 4 h at 45°C, 1 h at 21°C	2	WT	NA	NA	NA	NA	NA	NA	NA	NA	NA	NA	NA	NA	NA	NA	NA	NA	NA	NA	NA	NA	NA	NA	NA	NA	NA	NA	NA	NA	NA	NA	NA	NA	NA	NA	NA	NA	NA	NA	NA	NA	NA	NA	NA	NA	NA
H1.14.71	14	12 h at 38°C, 4 h at 45°C, 1 h at 21°C	2	WT	50.467	34.1126	192.73	19.7724	148.403	153.77	260.449	68.3081	270.17	170.446	243.521	175.638	46.5564	110.832	614.695	59.762	293.654	43.0681	92.9521	118.401	128.414	141.54	509.851	73.9614	369.623	83.1846	595.083	112.404	241.062	77.8507	181.716	73.9956	91.1656	166.773	77.2411	677.991	296.998	120.589	55.5383	74.046	1033.9	43.4954	118.4	60.6337	49.6793
H2.14.08	14	12 h at 38°C, 4 h at 45°C, 1 h at 21°C	2	WT	47.6111	41.6695	489.578	28.0987	206.209	202.082	300.753	97.3795	292.165	181.413	312.967	180.854	84.2154	178.86	414.801	107.113	307.106	66.086	147.786	143.425	155.415	162.061	295.798	83.1222	302.425	141.631	357.194	176.42	202.646	111.797	164.469	90.3238	82.7764	119.2	97.9022	342.936	154.517	124.459	59.0435	66.5574	654.852	62.7737	63.5734	89.057	72.2544
H2.14.14	14	12 h at 38°C, 4 h at 45°C, 1 h at 21°C	2	WT	41.9296	32.9326	289.111	80.2323	170.336	186.107	956.097	159.295	309.789	164.157	323.796	199.462	72.4587	138.928	663.823	96.6857	493.36	61.7055	187.827	226.671	145.86	142.68	424.773	78.9628	307.404	99.951	480.317	222.653	255.013	109.829	351.811	116.712	106.536	135.958	88.8525	653.195	145.105	119.7	63.3676	90.6425	1258.89	106.254	58.4017	71.23	60.6889
H2.14.24	14	12 h at 38°C, 4 h at 45°C, 1 h at 21°C	2	WT	51.32	41.4091	296.775	32.1741	205.229	197.59	611.577	132.449	349.419	193.597	340.799	200.909	102.879	155.605	488.042	96.0129	391.649	52.0552	163.117	213.118	148.311	163.127	318.651	87.5165	390.855	130.241	466.063	198.406	229.367	109.877	232.552	116.366	99.8812	117.3	99.5808	489.713	163.968	123.542	52.6163	103.17	1060.56	96.0702	69.3595	85.3994	77.9644
H2.14.51	14	12 h at 38°C, 4 h at 45°C, 1 h at 21°C	2	WT	43.9895	32.3274	247.287	31.6512	154.738	143.171	353.445	87.1131	238.985	127.905	267.917	172.89	72.3879	131.644	426.364	71.0532	319.033	44.5201	104.062	128.359	121.011	120.61	285.19	105.064	274.831	100.31	364.292	128.364	232.156	93.651	184.025	82.2202	119.487	106.993	82.3353	352.225	138.965	179.548	56.7092	60.8477	721.253	53.1068	51.4418	67.7429	49.6983
H2.14.53	14	12 h at 38°C, 4 h at 45°C, 1 h at 21°C	2	WT	45.5138	31.9392	209.702	16.6845	149.243	139.403	234.121	73.3939	225.889	133.166	257.62	149.854	64.3841	123.138	399.864	77.9985	222.096	51.9793	93.6418	122.61	105.837	118.862	256.228	87.8606	255.87	88.0905	341.483	127.16	219.325	71.0684	151.74	94.3201	91.3797	99.2198	70.9368	291.152	141.402	124.98	38.4889	57.412	719.42	44.5851	49.4529	56.7929	47.6126
H2.14.71	14	12 h at 38°C, 4 h at 45°C, 1 h at 21°C	2	WT	50.4691	40.2835	311.312	23.7485	204.341	176.411	303.756	95.7671	283.627	162.395	322.881	188.454	83.7635	149.582	434.013	88.7836	246.556	61.4099	109.588	134.001	144.034	155.568	257.825	120.669	321.32	110.328	375.059	151.918	204.303	109.081	144.628	116.002	123.056	99.735	92.1199	349.867	136.738	177.444	57.5913	87.9104	951.634	72.9734	60.8463	76.2644	66.2763
H3.14.01	14	12 h at 38°C, 4 h at 45°C, 1 h at 21°C	2	WT	54.1004	41.3584	532.803	28.7881	141.748	145.512	416.037	102.259	300.844	197.178	313.786	316.432	71.3724	131.454	577.303	94.0004	749.376	66.3791	125.19	204.306	134.498	161.621	639.462	114.431	380.987	91.1174	864.174	160.392	403.835	104.343	239.794	92.2042	111.854	216.343	91.9569	824.43	161.915	137.25	68.5861	75.3462	705.965	63.7612	57.5189	63.7452	57.2702
H3.14.05	14	12 h at 38°C, 4 h at 45°C, 1 h at 21°C	2	WT	46.508	33.8069	224.943	19.8734	131.645	127.28	252.33	59.7308	274.125	207.794	291.935	310.884	74.7227	155.934	581.988	111.607	765.72	47.7111	91.9579	157.678	119.516	162.698	538.797	127.092	348.49	90.4659	811.937	162.72	349.485	108.084	205.33	87.29	120.92	228.158	92.91	793.96	170.101	148.029	68.5846	67.4574	671.616	53.3385	54.1331	58.2546	64.7715
H3.14.28	14	12 h at 38°C, 4 h at 45°C, 1 h at 21°C	2	WT	41.9667	27.9352	226.479	22.7735	116.593	117.599	223.14	59.313	265.303	199.902	280.652	274.736	65.4765	116.963	570.651	70.6128	857.304	40.9345	79.3957	153.814	113.565	134.643	577.257	78.6016	277.315	70.5811	834.048	162.793	401.427	92.1395	230.249	76.4191	83.8863	251.851	81.8467	632.581	124.288	87.2973	51.6183	56.6082	590.836	49.4664	48.2474	55.0961	57.1139
H3.14.29	14	12 h at 38°C, 4 h at 45°C, 1 h at 21°C	2	WT	48.3649	31.5746	222.16	15.7681	125.803	118.733	238.903	57.82	309.761	177.039	300.71	255.822	68.0238	131.075	508.733	79.1016	757.034	49.3483	84.2251	140.456	106.863	153.474	634.855	82.7379	335.015	83.8209	859.276	167.287	437.513	96.7329	194.542	88.3935	83.908	213.06	77.2013	585.606	140.664	102.069	47.8671	67.6799	703.115	50.6883	46.8082	57.5877	64.2125
H3.14.34	14	12 h at 38°C, 4 h at 45°C, 1 h at 21°C	2	WT	39.506	31.9813	191.79	19.4749	137.004	113.238	242.157	78.0932	279.801	177.558	286.863	264.218	68.2395	134.403	479.476	86.5168	607.731	62.4349	75.9253	151.25	117.221	145.934	559.556	95.622	289.225	80.5402	809.86	157.283	359.392	96.7929	194.629	63.9511	93.155	190.337	76.8012	564.436	143.638	108.417	50.976	57.0928	555.428	47.9539	52.5879	54.7578	61.6849
H3.14.45	14	12 h at 38°C, 4 h at 45°C, 1 h at 21°C	2	WT	50.3197	34.8028	245.229	20.3097	135.194	122.117	227.19	69.3879	280.731	180.962	302.638	271.675	70.8333	132.861	573.864	75.0485	764.796	53.7442	85.3583	159.318	106.258	141.777	581.716	86.7197	308.426	86.1719	881.257	173.117	388.531	93.2141	198.798	76.1758	95.3644	232.791	83.6849	617.418	140.9	103.737	64.5814	57.9558	685.306	51.1382	51.9796	61.4324	61.0545
H1.15.09	15	40 h at 21°C	1	WT	36.8986	21.0338	185.155	11.2389	69.7498	87.3458	122.265	35.9507	150.252	88.4723	141.075	77.9341	30.7817	38.2377	133.818	27.2289	93.3242	18.5869	63.4162	88.6428	50.5839	91.9665	124.76	40.8773	124.191	46.3974	240.36	58.3535	121.198	56.0981	92.1589	52.9965	48.3694	47.3159	46.9651	111.1	60.4692	52.5774	20.697	36.4963	514.069	21.4888	22.3315	33.2582	20.7856
H1.15.22	15	40 h at 21°C	1	WT	25.496	14.1745	102.348	7.32487	49.9589	60.4295	122.43	28.2269	94.4772	71.2165	93.2583	50.8093	24.5426	22.7654	95.3527	18.4372	78.0234	14.0329	40.3164	97.857	35.1045	68.871	111.22	23.5289	94.7817	22.3965	169.229	56.9759	125.197	34.1066	64.7596	23.7093	28.0938	41.9598	33.8028	73.2395	46.6242	29.7331	6.02685	18.8976	369.074	10.1138	17.6326	21.6697	16.6367
H1.15.23	15	40 h at 21°C	1	WT	32.7093	15.3772	118.895	7.46804	53.3765	74.2706	129.602	30.1535	118.963	70.2863	109.681	53.1156	20.328	23.7569	145.163	12.9547	91.5344	21.8656	37.5531	62.5165	44.7071	69.1427	173.327	21.4655	97.6566	25.9856	227.971	54.8849	139.523	40.0374	82.6388	45.9704	32.246	52.4713	40.0288	125.073	50.6031	34.2358	11.0238	33.7452	494.893	17.2307	18.7999	23.6643	18.5068
H1.15.28	15	40 h at 21°C	1	WT	39.8886	19.402	123.684	9.46888	59.3599	77.4526	118.246	35.7281	131.472	78.4293	117.503	52.6785	24.969	26.9109	141.309	22.3047	113.606	20.7676	51.7256	85.2256	43.8939	76.0065	119.195	32.8895	135.47	37.2228	172.517	56.0592	115.714	39.3748	76.9753	35.0479	39.1551	54.7528	38.5237	103.112	56.2968	36.5027	16.2713	33.7987	519.041	22.2151	18.9511	26.5261	21.1877
H1.15.54	15	40 h at 21°C	1	WT	34.1961	16.078	139.689	10.0991	51.4153	109.094	149.114	35.4993	105.158	68.6752	112.928	55.3244	12.5226	30.1483	107.782	19.82	75.1046	16.0272	36.4116	77.7294	35.0626	70.7497	115.532	24.0169	109.738	24.7916	438.509	47.1822	100.941	32.0317	64.6526	38.2484	25.7798	29.574	27.0267	101.534	51.7102	37.6213	17.0584	24.7874	461.327	21.0229	13.6939	22.8467	17.04
H1.15.71	15	40 h at 21°C	1	WT	30.4019	18.4859	200.834	10.114	52.7279	105.376	148.576	31.6462	134.799	75.549	127.507	45.914	15.9927	32.1267	136.674	20.2793	76.384	20.3238	43.8958	74.6821	34.0875	78.0777	124.055	23.1309	126.988	35.1521	356.381	50.0069	121.276	31.6926	77.0341	37.903	31.4114	32.7343	36.3806	124.697	73.0059	34.8808	18.8755	24.9604	442.222	19.1197	21.9238	26.9495	17.3613
H2.15.08	15	40 h at 21°C	1	WT	54.8223	31.1402	309.563	17.1703	138.086	159.143	266.114	73.3079	263.203	73.5125	279.268	139.258	61.9121	119.762	372.206	75.9922	303.037	44.3846	94.7866	129.037	104.367	93.6307	345.007	100.066	232.888	84.206	509.994	135.101	226.301	71.2664	196.465	113.661	119.684	97.6165	80.031	203.783	114.757	166.025	43.4251	49.079	950.327	43.5728	46.0489	61.1644	47.2303
H2.15.14	15	40 h at 21°C	1	WT	51.0398	30.7978	360.544	21.2616	149.29	148.178	239.463	71.6977	257.698	76.5795	281.2	160.942	69.1049	109.526	314.267	60.6811	391.959	36.2987	96.0554	125.69	109.498	96.5329	399.52	128.106	276.261	90.6905	379.634	151.954	251.559	91.0347	294.158	92.0976	119.232	110.861	96.8934	190.295	132.663	152.02	47.5395	68.3274	1052.6	52.8741	49.0359	65.5702	56.8581
H2.15.24	15	40 h at 21°C	1	WT	60.7545	34.1036	360.978	19.5544	160.025	162.314	259.395	70.53	256.639	72.7266	276.984	169.929	78.8883	119.921	380.129	76.3683	364.566	49.2616	100.314	150.396	115.309	101.388	319.465	115.763	257.788	95.9632	450.726	175.894	228.144	81.5019	216.829	126.315	122.593	95.1477	89.5043	213.211	122.396	175.867	46.1775	62.2703	1085.73	47.5747	48.268	68.193	55.6168
H2.15.51	15	40 h at 21°C	1	WT	48.7674	30.9177	223.427	18.3199	113.165	122.594	244.442	56.2136	233.568	61.8305	224.532	124.107	56.6217	83.0865	332.712	57.1639	295.166	39.4029	84.6219	127.43	95.6365	77.8166	271.866	60.3063	224.692	72.3839	362.492	123.028	235.078	69.0499	177.814	87.8299	69.4945	85.5321	71.182	181.195	113.477	91.4847	36.5459	54.1357	999.591	50.659	43.6885	58.2118	39.7948
H2.15.53	15	40 h at 21°C	1	WT	50.1328	31.2206	222.201	17.4943	123.027	119.283	235.078	63.9053	240.181	60.2877	231.522	160.609	58.8205	89.0814	329.852	59.5739	301.248	40.7775	89.0826	138.583	89.504	82.7744	280.516	69.1726	226.091	78.0072	376.301	114.945	273.407	63.5783	205.391	81.8531	73.0579	98.6193	65.8795	178.269	125.402	79.6792	39.2648	48.5747	945.812	50.5419	45.8657	50.0044	45.2035
H2.15.71	15	40 h at 21°C	1	WT	53.3571	31.3279	342.218	18.7866	139.609	119.597	287.155	82.3673	265.048	70.9159	245.625	157.251	63.7604	106.797	358.197	65.5925	243.309	46.973	92.736	132.16	87.4581	84.5798	228.88	57.1324	250.991	97.4754	440.648	112.867	260.13	67.2844	152.71	70.172	70.2737	67.8413	72.5416	175.934	137.375	87.8379	35.9361	63.5506	808.883	46.4987	46.7512	56.2572	49.1861
H3.15.01	15	40 h at 21°C	1	WT	37.0336	29.8352	247.647	13.6445	66.3096	71.221	123.031	22.5191	203.783	40.7769	200.642	223.733	48.715	104.509	375.747	60.0488	644.722	40.0768	59.697	133.544	70.6812	66.4133	220.153	56.7159	239.54	59.5841	507.616	132.097	299.657	54.6057	181.751	57.3047	73.3885	181.581	58.9122	198.663	136.493	74.7258	39.9132	48.3613	562.991	32.1398	38.8212	48.8412	38.5668
H3.15.05	15	40 h at 21°C	1	WT	48.3877	54.6659	700.793	39.0089	91.8491	111.947	283.468	56.6432	196.388	61.5544	213.98	157.136	65.139	105.271	426.363	68.0004	493.397	49.3907	147.723	206.66	73.6608	83.1602	207.424	109.646	238.545	90.4688	578.995	139.617	252.232	82.2434	170.203	73.5879	109.338	137.551	78.3026	196.273	130.615	135.835	47.2255	41.1936	518.063	58.3555	50.2541	73.7232	51.4912
H3.15.28	15	40 h at 21°C	1	WT	53.0844	40.1276	254.528	14.8479	81.4414	90.5863	223.079	48.3799	214.154	48.2497	236.46	208.744	53.7903	137.868	448.043	72.2525	737.524	48.3387	79.1676	149.866	86.0945	77.3579	308.467	133.987	263.07	78.1702	603.332	147.235	337.419	76.4646	225.837	98.9115	145.458	235.211	73.3824	219.067	142.203	218.327	53.1633	61.9197	769.42	42.6415	44.4153	55.8445	57.5706
H3.15.29	15	40 h at 21°C	1	WT	36.6916	41.0455	507.396	21.3916	88.0909	90.9066	160.31	43.5535	220.824	53.9533	235.326	183.426	45.9069	97.4836	437.698	57.8777	663.901	50.2138	99.5931	186.74	85.6482	81.7735	325.758	107.953	240.605	77.4341	568.913	152.274	317.761	77.3994	192.443	90.9622	118.282	208.745	71.8731	194.385	134.583	145.201	52.6548	45.8114	506.394	43.5626	41.7066	62.1674	53.281
H3.15.34	15	40 h at 21°C	1	WT	37.7001	30.6591	252.66	16.2961	80.9145	84.8861	204.863	32.3655	297.082	58.5791	260.764	192.871	50.6672	109.919	410.981	59.1298	723.849	37.6246	79.4265	137.441	89.3865	80.494	439.704	75.3508	232.741	69.6236	651.598	150.782	420.089	54.5467	176.535	72.0871	83.918	208.865	64.3781	218.012	132.818	90.3938	54.7302	64.8091	638.519	47.7086	43.7824	53.6905	49.8176
H3.15.45	15	40 h at 21°C	1	WT	39.1343	31.759	323.742	15.8208	99.3489	107.21	215.735	44.1583	220.249	63.4743	250.131	186.164	54.4242	134.54	443.048	76.2286	662.317	42.6673	69.1816	151.26	98.2909	85.2689	335.16	68.012	298.031	77.2852	549.475	154.937	324.124	78.0276	246.875	77.5174	85.3574	217.834	65.3591	210.735	144.643	95.4226	41.9468	65.3328	714.054	45.4966	49.4873	59.3494	48.0874
H1.16.09	16	12 h at 21°C, 4 h at 45°C, 24 h at 21°C	3	WT	49.5735	27.7487	256.375	17.9419	111.171	210.366	255.86	66.6409	203.964	164.996	192.946	105.539	36.7926	71.1578	301.998	31.3472	139.796	28.0046	65.9287	113.588	93.3758	90.5863	280.263	33.8629	190.387	49.8518	584.336	154.586	156.592	67.2218	170.585	57.9085	48.9977	54.5776	46.1638	233.957	66.2663	51.5904	27.5223	69.6327	928.949	38.3351	29.4657	41.0208	30.4449
H1.16.22	16	12 h at 21°C, 4 h at 45°C, 24 h at 21°C	3	WT	82.9336	64.874	566.305	45.8342	163.184	294.332	460.48	116.906	278.518	115.652	351.273	164.933	105.413	113.521	357.578	94.2065	209.48	60.9746	117.828	137.522	117.832	133.309	273.275	72.3989	275.892	105.121	947.254	107.898	176.841	84.4183	200.038	136.639	101.038	91.5801	91.9705	243.487	107.321	121.488	72.1412	84.6337	1395.3	74.2001	51.9356	88.5054	62.7333
H1.16.23	16	12 h at 21°C, 4 h at 45°C, 24 h at 21°C	3	WT	57.6783	39.3556	346.451	14.4639	104.413	279.685	328.992	61.3651	257.193	65.8245	266.25	156.795	53.8394	87.4507	366.153	57.288	318.977	37.9084	77.659	112.357	94.1425	94.9864	322.576	74.5592	261.773	79.4894	1006.51	106.766	195.602	83.4379	198.185	97.8371	82.5665	101.249	67.0065	183.601	121.863	100.973	30.2698	57.0572	1109.06	58.2521	36.362	53.206	43.1146
H1.16.28	16	12 h at 21°C, 4 h at 45°C, 24 h at 21°C	3	WT	63.7336	35.2505	275.381	18.8994	101.113	261.928	265.463	63.6055	230.521	115.25	240.506	110.865	49.4147	78.7776	370.799	41.0913	180.485	37.3287	78.6446	104.275	71.6583	94.2574	285.439	70.005	244.335	66.9319	772.333	92.1297	184.177	61.2583	149.085	69.4148	80.2915	69.9329	52.5113	252.58	102.253	100.648	31.9868	83.3024	1172.02	34.5165	32.8175	48.4177	31.518
H1.16.54	16	12 h at 21°C, 4 h at 45°C, 24 h at 21°C	3	WT	43.7813	24.5462	193.653	11.9863	88.0774	200.538	188.106	27.0043	204.475	107.661	183.992	97.7245	33.6172	60.4737	339.569	33.2801	139.775	12.9564	62.0269	105.312	68.3629	78.2765	204.237	40.3935	203.545	46.4253	575.645	83.3025	139.94	51.0827	119.266	66.3088	45.6011	55.3808	37.0958	216.921	79.1794	62.1594	31.6858	76.1801	1052.5	28.3931	28.0987	36.5945	22.8766
H1.16.71	16	12 h at 21°C, 4 h at 45°C, 24 h at 21°C	3	WT	NA	NA	NA	NA	NA	NA	NA	NA	NA	NA	NA	NA	NA	NA	NA	NA	NA	NA	NA	NA	NA	NA	NA	NA	NA	NA	NA	NA	NA	NA	NA	NA	NA	NA	NA	NA	NA	NA	NA	NA	NA	NA	NA	NA	NA
H2.16.08	16	12 h at 21°C, 4 h at 45°C, 24 h at 21°C	3	WT	42.0382	32.3106	420.605	18.5816	129.663	112.202	257.325	53.1764	219.036	56.6309	241.104	149.757	53.3357	85.4949	298.195	55.3944	221.525	41.4454	91.8879	160.251	79.1671	79.8285	224.536	70.4149	227.264	82.9958	433.072	92.3927	247.014	60.2886	127.249	61.4356	78.4643	73.3174	69.4269	194.707	132.734	93.3899	39.8417	45.9517	543.462	40.7871	45.2061	55.679	37.7147
H2.16.14	16	12 h at 21°C, 4 h at 45°C, 24 h at 21°C	3	WT	48.6083	31.2902	301.24	16.7264	110.849	93.4581	226.269	44.6495	222.475	54.6555	261.094	453.574	42.4838	79.8062	332.513	57.2838	432.321	38.6329	63.0619	147.51	102.237	74.369	269.749	62.8606	237.977	75.981	444.608	296.352	285.07	73.593	231.238	61.0564	97.2437	101.748	61.5545	159.112	107.955	94.6632	31.7759	45.6063	579.791	35.9633	43.0118	52.2412	32.458
H2.16.24	16	12 h at 21°C, 4 h at 45°C, 24 h at 21°C	3	WT	45.6607	32.1817	336.519	22.3893	137.792	120.043	429.228	76.8971	275.495	94.774	326.718	214.211	54.4917	126.788	389.513	65.3169	352.572	50.8364	101.488	169.549	97.3413	89.7798	350.628	87.6636	318.453	99.3281	535.492	172.137	296.568	82.1253	275.215	74.4705	109.044	94.2668	68.9995	239.841	134.462	114.802	61.108	52.3525	658.022	52.6711	52.0906	60.8191	49.1301
H2.16.51	16	12 h at 21°C, 4 h at 45°C, 24 h at 21°C	3	WT	42.35	33.848	317.531	18.7297	128.391	113.41	308.777	53.3744	232.454	64.4815	239.507	154.563	53.9366	72.3281	308.37	49.2055	332.916	45.4132	82.8432	163.833	84.8573	81.307	293.639	67.0519	298.329	83.7214	621.784	98.0865	249.186	68.2036	169.546	54.7449	73.2011	90.2704	72.2731	198.144	137.01	89.0121	29.1612	48.0497	496.029	47.0191	50.3052	57.8637	48.1113
H2.16.53	16	12 h at 21°C, 4 h at 45°C, 24 h at 21°C	3	WT	48.6317	30.9842	289.296	15.4079	129.296	115.799	262.693	62.7722	224.983	58.6424	251.658	244.963	71.1283	72.869	511.382	57.504	308.345	46.9169	74.0482	397.333	77.743	83.2657	239.36	62.0251	254.365	85.5553	647.553	101.612	263.501	69.9254	142.208	61.5892	77.7937	102.502	60.9324	193.876	113.051	91.7933	39.2509	42.8661	559.484	45.7856	51.3181	53.8753	47.9409
H2.16.71	16	12 h at 21°C, 4 h at 45°C, 24 h at 21°C	3	WT	48.2901	32.1584	287.664	13.798	131.493	114.836	273.12	57.9195	239.972	63.7809	245.142	203.68	67.6458	88.9906	420.536	52.4683	209.46	59.3205	61.5083	221.891	82.399	74.6337	214.83	41.645	261.102	77.2947	454.642	89.9141	236.531	58.2989	108.307	65.6862	77.1814	68.4888	66.2673	178.721	116.685	89.6746	30.36	50.1504	545.836	35.909	46.7067	52.1997	38.35
H3.16.01	16	12 h at 21°C, 4 h at 45°C, 24 h at 21°C	3	WT	46.1318	38.4007	227.088	18.6	121.722	128.396	196.335	67.0126	303.24	107.334	225.439	187.616	59.2063	116.563	670.162	72.2159	528.61	42.568	80.9801	126.061	85.5026	91.015	369.278	85.518	384.318	72.1808	561.815	128.251	298.65	89.0645	256.028	61.2158	90.1334	169.088	66.1144	374.496	155.346	93.1309	55.2919	74.012	839.741	45.4302	64.2791	52.8456	41.2037
H3.16.05	16	12 h at 21°C, 4 h at 45°C, 24 h at 21°C	3	WT	37.5953	34.073	216.656	35.608	139.355	134.626	791.066	120.683	277.514	127.181	244.298	239.093	75.8677	150.034	688.859	131.118	698.45	55.6708	152.309	204.657	107.214	94.2998	398.919	107.837	326.224	84.2424	541.664	210.321	345.233	96.2527	384.432	63.4259	111.349	190.1	80.4752	444.475	136.089	105.357	78.939	101.576	785.744	90.9296	53.0164	54.3137	54.2193
H3.16.28	16	12 h at 21°C, 4 h at 45°C, 24 h at 21°C	3	WT	44.9291	40.3859	521.789	22.9604	121.72	112.155	318.411	72.0293	224.971	91.2983	229.349	198.993	56.225	102.695	583.18	75.3709	615.912	58.8187	132.541	195.375	75.1979	84.6073	279.325	95.6854	287.119	71.7744	546.211	135.109	309.336	81.6522	219.429	73.7041	95.7246	175.064	67.6202	309.644	129.134	105.115	50.6419	81.5401	642.953	54.7146	51.0015	57.5161	57.1122
H3.16.29	16	12 h at 21°C, 4 h at 45°C, 24 h at 21°C	3	WT	40.612	39.4573	274.268	43.8739	121.016	112.001	819.036	133.024	242.317	128.406	227.532	227.384	54.8435	118.483	702.262	94.4912	636.344	42.4566	144.87	171.465	97.4969	83.6666	346.81	82.1023	282.245	66.1579	572.215	146.866	311.074	77.4259	255.231	58.139	89.2933	175.233	62.2741	394.595	98.1066	85.8491	66.9176	114.619	888.262	80.6368	52.8621	55.6583	53.3816
H3.16.34	16	12 h at 21°C, 4 h at 45°C, 24 h at 21°C	3	WT	34.9582	32.3362	195.534	25.3659	194.929	135.97	512.243	94.3196	244.662	223.625	267.73	208.184	61.3727	140.373	651.233	98.1905	671.725	54.2227	99.7631	125.074	119.708	87.5268	445.218	83.3023	291.079	82.8579	615.485	489.013	372.844	109.616	580.455	75.2009	114.995	201.42	65.9746	403.508	120.515	80.9099	61.2439	85.8486	732.319	59.0961	46.2062	46.6415	49.1521
H3.16.45	16	12 h at 21°C, 4 h at 45°C, 24 h at 21°C	3	WT	31.4451	30.1982	193.292	18.7969	102.165	105.32	305.951	84.3171	229.204	97.8494	224.988	215.059	58.7274	117.09	655.257	77.7349	634.982	46.4812	77.5186	156.88	76.6448	79.3248	336.699	103.454	279.739	64.4712	577.077	113.362	344.558	79.2516	283.611	67.6471	90.943	188.346	66.3794	355.973	127.262	113.536	59.0561	69.0891	712.737	45.5663	41.3238	39.3584	42.4785
H1.17.09	17	12 h at 38°C, 4 h at 45°C, 24 h at 21°C	2	WT	79.6225	36.6906	264.923	42.9289	121.347	173.173	605.459	111.474	235.332	153.667	292.569	120.99	54.2983	107.276	400.896	59.1722	200.139	44.9748	127.957	150.603	79.6518	95.1368	289.283	82.0469	259.23	73.8487	475.89	146.788	213.717	74.2648	254.657	67.3344	88.5375	76.9645	86.9745	285.656	80.5325	90.1162	67.2098	128.714	1590.91	80.5842	39.6515	53.5545	36.9794
H1.17.22	17	12 h at 38°C, 4 h at 45°C, 24 h at 21°C	2	WT	72.2048	34.0662	369.137	16.6059	89.2688	148.011	230.757	47.3441	201.16	143.344	207.968	108.055	43.5249	78.6469	344.019	38.3228	162.217	36.679	68.001	104.029	61.9876	87.3858	281.469	61.3057	211.89	60.3103	474.322	77.6718	212.563	65.9205	133.524	58.3766	59.0307	70.5737	63.0442	296.814	89.1783	75.7784	30.9208	79.0017	1132.33	38.4496	30.7504	48.6924	25.5278
H1.17.23	17	12 h at 38°C, 4 h at 45°C, 24 h at 21°C	2	WT	86.0312	42.2168	463.085	23.5979	118.524	172.435	318.405	75.2667	236.612	159.94	242.147	131.385	61.0643	89.9596	319.251	43.0694	158.273	36.2464	82.0933	131.138	77.0643	103.464	235.102	82.0567	255.52	79.4856	560.107	84.9665	228.676	77.2919	143.936	89.0517	82.5338	78.4834	85.6257	231.893	96.8374	78.9642	48.7997	85.6567	1259.35	58.4467	39.3994	54.0778	37.3838
H1.17.28	17	12 h at 38°C, 4 h at 45°C, 24 h at 21°C	2	WT	110.938	54.8539	691.689	34.9977	127.121	184.203	503.6	99.2803	270.182	175.419	268.981	112.996	63.1369	105.543	453.488	55.6199	248.223	43.4909	100.32	138.526	86.1665	100.88	332.963	85.9943	220.986	68.2504	583.297	112.64	272.513	96.4948	200.497	100.73	98.4452	108.391	96.6098	328.266	122.367	98.2519	56.9113	109.49	1544.68	64.6566	43.0548	59.9279	35.7355
H1.17.54	17	12 h at 38°C, 4 h at 45°C, 24 h at 21°C	2	WT	80.5346	40.1563	284.549	18.9433	121.417	162.306	398.056	38.164	236.526	105.439	260.026	151.713	56.5372	80.6606	314.018	56.0502	232.85	40.038	93.0012	127.711	81.8658	72.3392	258.478	105.9	246.032	76.6054	582.343	113.314	293.481	58.6177	176.946	70.6989	97.4511	103.444	82.6849	191.235	134.404	100.62	43.0672	65.6225	1020.29	64.8388	40.9533	56.4392	48.313
H1.17.71	17	12 h at 38°C, 4 h at 45°C, 24 h at 21°C	2	WT	92.3361	45.6132	333.209	57.3471	142.627	192.524	724.532	130.734	247.22	185.843	256.729	144.894	68.943	116.149	491.042	72.0623	168.886	75.2963	142.594	126.394	84.5225	117.282	335.079	98.9718	252.076	90.6924	583.567	112.821	244.091	89.2572	168.338	83.8496	95.6444	80.3257	74.8542	412.337	119.385	102.785	49.9242	104.168	1371.9	72.458	55.7044	62.2309	45.4935
H2.17.08	17	12 h at 38°C, 4 h at 45°C, 24 h at 21°C	2	WT	61.6253	46.7316	378.713	24.7132	188.286	167.029	386.571	96.4673	388.193	125.564	325.898	334.251	118.488	119.66	709.415	104.76	303.195	60.3651	114.084	361.218	118.457	125.04	312.722	81.8753	411.858	123.218	536.374	146.221	252.092	89.3974	177.382	101.577	109.202	100.81	105.489	295.607	131.598	144.502	43.6838	89.9763	836.34	69.9291	64.4816	78.2359	98.8403
H2.17.14	17	12 h at 38°C, 4 h at 45°C, 24 h at 21°C	2	WT	48.5707	36.5124	269.094	19.9625	144.865	124.384	292.052	52.2451	291.516	102.685	291.585	189.853	68.3016	105.567	422.539	75.9783	309.13	47.8013	83.3392	190.322	90.2413	86.8687	283.46	69.3253	350.04	92.9078	541.307	117.747	309.28	73.2515	125.835	66.9848	85.7345	86.4842	67.5913	222.535	136.86	99.7043	43.1952	72.1686	615.885	49.0083	55.1789	65.2708	52.9409
H2.17.24	17	12 h at 38°C, 4 h at 45°C, 24 h at 21°C	2	WT	53.1247	44.2359	398.263	27.2322	166.184	147.097	423.202	96.8825	302.943	120.428	297.127	248.166	90.3491	138.216	489.008	92.1447	323.819	63.5634	112.305	245.614	115.826	112.102	307.002	82.4993	394.43	119.192	610.693	123.924	276.968	92.8023	175.05	86.8719	93.4375	98.1266	77.6012	277.069	119.487	107.51	45.5388	77.8278	713.862	71.5688	57.0351	80.223	74.1971
H2.17.51	17	12 h at 38°C, 4 h at 45°C, 24 h at 21°C	2	WT	43.8953	33.6207	404.293	18.7459	127.715	133.292	275.521	39.0936	215.563	95.2464	268.566	150.068	52.6149	93.0444	327.673	54.5237	254.894	41.5195	65.8679	134.611	86.629	79.2665	258.792	53.7903	279.494	90.4366	578.383	99.4867	261.055	60.8639	122.037	60.7349	65.0998	72.8987	59.9158	208.822	140.194	80.1327	35.8948	50.781	623.134	44.6012	49.1664	60.2203	41.8228
H2.17.53	17	12 h at 38°C, 4 h at 45°C, 24 h at 21°C	2	WT	48.8169	37.8928	305.267	16.97	130.732	156.692	328.161	49.5533	256.821	102.076	283.662	174.376	61.1719	104.397	330.974	60.9547	269.499	43.2394	79.1753	145.424	84.4865	90.0801	269.562	49.2671	323.91	97.9172	713.637	109.688	264.749	72.584	117.078	70.4872	66.6447	78.5319	67.2041	224.518	127.751	92.4376	30.7663	55.0227	671.509	48.31	48.9168	68.2282	52.9358
H2.17.71	17	12 h at 38°C, 4 h at 45°C, 24 h at 21°C	2	WT	47.4044	41.5953	324.705	16.4058	138.588	143.436	320.14	54.8133	269.048	107.966	288.18	175.077	58.4117	97.8777	366.167	59.5338	291.015	45.9378	88.485	163.474	93.1935	94.3467	305.55	59.2118	352.933	98.8804	544.383	117.649	272.134	76.1188	139.33	76.3927	64.8994	82.2568	76.6749	228.323	135.619	90.5317	41.7062	63.1953	704.881	49.6178	49.3771	67.9352	51.4633
H3.17.01	17	12 h at 38°C, 4 h at 45°C, 24 h at 21°C	2	WT	37.6106	30.8968	221.461	32.2844	120.241	122.164	633.206	136.759	251.994	135.232	228.305	188.699	68.3345	118.681	491.354	99.9467	465.315	39.0601	119.448	177.35	77.999	75.6397	334.724	91.1894	292.773	89.5026	492.151	121.584	269.029	77.9596	277.058	65.7887	88.8726	118.875	60.9496	388.643	121.134	82.5422	53.7228	75.6639	663.728	69.8497	46.2166	49.3403	44.3203
H3.17.05	17	12 h at 38°C, 4 h at 45°C, 24 h at 21°C	2	WT	33.5459	31.1407	213.902	17.8461	117.391	116.301	267.619	68.2829	230.474	122.831	218.873	177.692	64.7784	112.149	439.517	84.6332	380.598	43.8211	86.3832	148.421	79.8961	85.4089	306.657	77.3503	256.003	79.0727	466.17	122.325	227.535	77.5103	234.834	69.612	88.5798	111.635	62.0316	306.708	97.6686	101.561	50.2814	56.6833	526.897	52.2734	42.7257	48.8592	48.9092
H3.17.28	17	12 h at 38°C, 4 h at 45°C, 24 h at 21°C	2	WT	32.9329	29.1776	288.071	24.4999	114.685	111.433	433.674	79.8455	196.821	146.626	225.279	168.87	57.6925	97.9854	443.114	67.6742	399.666	34.0866	99.2292	138.54	85.2418	79.5805	283.408	72.0212	269.713	70.698	477.636	140.587	201.678	77.5765	288.174	59.6111	74.6594	102.811	58.7967	327.21	81.4881	80.5162	49.0945	58.1763	603.697	53.2035	38.6833	43.3741	48.9457
H3.17.29	17	12 h at 38°C, 4 h at 45°C, 24 h at 21°C	2	WT	32.1105	30.9974	282.101	18.7857	109.794	124.182	241.946	80.5499	216.507	132.23	226.89	149.655	55.3628	107.541	424.07	75.0403	439.403	40.1419	76.3777	155.443	90.5905	84.5235	305.243	69.9939	268.297	72.7494	467.257	117.993	255.716	78.0202	258.408	70.1998	79.4554	120.679	59.3499	309.606	107.1	76.6597	39.5196	57.0005	540.916	48.049	37.4638	46.7437	48.3401
H3.17.34	17	12 h at 38°C, 4 h at 45°C, 24 h at 21°C	2	WT	30.1527	29.7726	261.598	26.9535	131.462	151.091	401.855	80.383	240.295	146.761	232.556	153.978	65.8813	131.173	393.22	88.9591	320.369	38.1945	128.601	173.445	84.9566	89.7546	325.889	61.6588	257.636	85.8349	450.778	132.176	240.642	80.9238	260.277	67.4615	85.4977	91.5939	57.8794	311.037	109.6	78.1369	51.7573	54.1894	613.413	52.1576	44.0291	48.4867	47.2371
H3.17.45	17	12 h at 38°C, 4 h at 45°C, 24 h at 21°C	2	WT	33.0206	29.2526	267.63	18.3775	110.548	145.187	216.972	78.7618	259.318	123.737	226.791	179.585	82.5041	132.184	486.847	98.484	470.442	60.0115	101.66	166.161	86.7856	92.6113	354.809	105.732	269.823	91.7154	493.012	103.581	240.709	71.0449	212.637	71.3194	118.556	143.481	77.0361	388.201	134.556	172.189	42.9553	59.493	618.505	50.0516	43.0712	48.9799	49.3667
H1.01.11	1	21° C	1, 2, and 3	opr3	65.8338	50.0145	576.355	35.9571	164.879	211.917	235.649	86.5572	255.296	67.3134	308.195	272.771	67.5473	99.3055	311.244	93.2832	417.072	59.2683	111.551	146.489	131.682	115.144	290.534	172.542	298.186	100.201	573.471	147.945	212.796	93.3845	224.58	114.962	117.695	111.084	99.9437	198.107	152.088	173.549	40.1879	190.452	2066.86	84.7073	50.2115	78.9791	59.4418
H1.01.48	1	21° C	1, 2, and 3	opr3	47.004	41.2848	347.814	31.5761	187.305	222.957	262.331	127.101	331.316	88.632	340.78	289.077	103.088	183.642	361.293	91.7935	441.951	93.5706	147.731	208.708	122.26	139.581	357.338	157.486	327.241	136.407	512.035	149.719	242.886	105.864	216.37	147.262	134.659	94.0642	102.215	190.013	153.916	208.431	57.534	124.259	1452.35	80.1565	45.7348	80.4633	48.6533
H1.01.52	1	21° C	1, 2, and 3	opr3	43.5309	42.929	297.868	20.0879	152.648	183.063	220.29	82.8324	233.435	74.1842	264.236	205.179	74.2783	120.542	287.147	99.9488	335.655	59.9303	114.886	172.739	107.126	96.6559	253.844	89.2321	227.907	106.617	458.418	117.667	205.56	87.5869	195.995	116.35	95.6693	92.5327	75.6813	177.763	116.351	129.235	48.0547	126.96	1241.83	59.5623	41.5092	71.4415	53.0595
H2.01.05	1	21° C	1, 2, and 3	opr3	96.2519	69.4437	563.886	33.2424	232.438	324.279	483.77	149.196	481.228	111.728	483.872	331.633	156.028	267.349	413.772	142.659	490.219	86.2828	198.765	257.387	213.892	154.971	541.486	177.675	416.554	150.888	1168.86	192.738	396.16	136.608	330.3	181.609	145.144	137.812	143.416	228.346	187.274	176.718	81.918	146.779	2125.25	110.841	69.8687	103.817	80.3537
H2.01.35	1	21° C	1, 2, and 3	opr3	76.8928	48.0504	624.037	26.94	188.091	216.277	453.507	106.38	365.155	76.386	413.761	315.977	110.226	154.14	445.507	107.938	449.76	81.0043	149.171	214.485	129.572	136.967	404.993	157.887	425.241	130.238	1253.92	174.879	434.585	125.264	280.211	130.995	167.622	124.907	114.19	242.683	151.409	204.338	61.0182	100.247	1791.71	74.6216	76.0748	84.9648	73.2889
H2.01.44	1	21° C	1, 2, and 3	opr3	84.457	50.7592	454.114	27.3512	179.381	201.465	380.03	94.6055	328.496	76.5325	399.852	318.184	122.057	187.257	420.937	129.191	468.585	73.4614	134.188	184.39	134.754	124.924	385.236	118.244	388.397	131.843	905.347	154.631	391.27	109.111	254.454	124.226	149.202	116.059	109.263	235.42	172.663	165.526	54.1377	120.228	1733.27	77.0218	69.0673	88.9708	86.1831
H3.01.04	1	21° C	1, 2, and 3	opr3	43.4791	29.7855	486.325	21.7206	93.8814	92.2003	242.091	56.5555	200.662	50.0403	233.056	168.974	61.9745	99.1345	345.362	69.7518	297.44	46.5864	94.2415	213.224	84.8017	88.5848	199.59	131.035	272.663	83.8171	387.296	106.228	258.739	59.9022	115.646	90.8795	161.293	88.629	66.2187	174.684	117.391	231.1	35.8626	69.6104	593.716	53.7453	39.765	58.663	52.8211
H3.01.38	1	21° C	1, 2, and 3	opr3	35.8505	30.645	479.185	19.0938	88.0062	86.2565	228.201	45.5572	208.902	48.8516	226.464	186.648	49.9369	94.2713	361.621	56.9345	502.456	40.3998	86.8195	169.198	79.8161	79.444	224.893	66.1417	265.502	69.731	502.707	99.3791	285.143	63.0354	150.258	50.5376	75.8903	129.028	61.34	160.457	104.975	91.3742	38.4125	45.4338	594.898	39.2772	36.4202	46.1005	47.0699
H3.01.41	1	21° C	1, 2, and 3	opr3	41.6307	35.19	266.018	18.258	111.775	95.7424	245.436	50.6329	216.995	57.3109	256.766	241.457	55.6984	102.893	367.153	63.9279	401.054	47.5793	73.9836	147.78	82.4897	80.1885	269.908	69.8231	339.566	85.6677	534.328	105.289	294.559	64.7867	140.834	58.5227	81.6861	98.5838	61.0888	203.456	121.991	107.79	36.1256	61.4971	655.825	49.5741	39.9792	52.1264	44.6067
H1.02.11	2	1 h at 21°C	1 and 3	opr3	47.978	37.3812	294.725	24.138	141.793	187.861	249.234	79.383	241.272	77.71	279.13	184.846	62.298	100.729	326.22	73.3038	283.868	79.3655	100.728	167.348	111.331	102.982	258.257	90.2425	228.603	79.0977	552.811	106.518	225.058	76.3096	151.022	130.429	75.6402	74.8145	68.9408	191.82	130.399	117.848	46.7741	78.3375	975.156	46.8292	41.2943	70.4676	42.2832
H1.02.48	2	1 h at 21°C	1 and 3	opr3	44.2448	36.668	394.026	19.7192	126.76	154.238	221.02	80.656	220.754	60.5902	237.065	123.046	57.2066	115.652	247.262	67.3899	281.035	40.73	84.3111	143.007	106.993	91.7264	221.65	71.3681	235.942	77.1247	396.755	100.759	194.742	65.2613	176.366	98.235	82.795	74.4723	74.0214	145.656	120.987	101.812	38.5691	57.0318	828.147	38.0252	36.1909	58.1423	32.6863
H1.02.52	2	1 h at 21°C	1 and 3	opr3	38.2019	28.6658	216.92	9.87022	87.4372	126.289	181.765	52.311	159.023	59.4526	175.232	106.428	33.6438	41.8767	212.073	36.449	127.298	27.0127	71.282	128.553	64.2493	88.1252	215.41	44.3718	180.303	47.6829	370.165	83.7373	146.938	40.97	103.72	60.852	44.6865	60.2294	54.006	145.076	81.6672	55.6914	24.3356	80.1262	883.516	21.1111	29.6234	46.6588	27.2174
H2.02.05	2	1 h at 21°C	1 and 3	opr3	89.7725	62.9691	575.101	35.433	236.97	307.055	487.421	165.369	466.674	108.63	515.636	383.435	175.051	273.842	494.656	176.338	638.033	140.578	226.398	242.529	200.488	172.593	453.151	207.928	370.301	173.94	1094.95	228.03	449.914	185.652	334.523	217.124	201.655	155.98	116.237	249.383	220.524	257.286	87.1149	123.485	1716.73	93.427	73.9472	112.735	98.5533
H2.02.35	2	1 h at 21°C	1 and 3	opr3	88.7641	70.5585	479.717	33.3008	212.44	246.165	466.839	116.685	366.957	93.5679	491.338	259.207	131.679	226.521	457.041	140.379	425.975	109.154	148.545	191.991	164.867	173.537	409.569	159.688	503.57	152.545	996.69	221.09	416.191	132.725	275.26	177.211	160.39	138.137	124.86	210.994	181.639	158.903	77.706	146.012	2232.15	107.557	71.7203	102.468	105.092
H2.02.44	2	1 h at 21°C	1 and 3	opr3	71.9591	61.3575	828.142	38.4226	223.762	231.448	421.969	116.455	331.797	95.2143	460.972	314.818	130.711	252.821	444.114	161.313	372.306	119.436	173.01	205.068	164.186	143.408	365.467	133.963	498.422	159.144	879.879	205.598	373.035	141.369	261.834	174.661	139.536	125.845	112.123	211.841	176.538	154.956	69.3613	119.9	1794.6	103.523	70.8	98.9105	105.758
H3.02.04	2	1 h at 21°C	1 and 3	opr3	43.9815	36.5813	353.466	24.6165	112.759	100.515	324.426	61.3282	271.652	62.9047	284.368	233.77	62.2034	104.303	421.539	63.1058	703.031	51.5617	94.5529	181.608	88.194	90.9564	346.469	73.9499	364.103	88.2951	594.186	125.57	331.878	66.3145	201.859	71.68	88.5016	154.842	76.2938	247.925	113.059	104.984	52.1363	71.1304	840.368	52.8574	46.5138	55.3176	55.5358
H3.02.38	2	1 h at 21°C	1 and 3	opr3	47.5812	34.2177	207.639	18.8703	122.136	116.734	274.421	66.4173	248.449	63.8324	248.774	202.246	70.752	122.692	407.412	71.8426	364.449	51.3072	88.8095	164.767	97.9368	95.446	288.887	158.282	356.742	89.4535	470.864	122.012	278.379	75.7089	168.635	82.9215	162.519	105.987	72.1813	211.221	149.185	223.187	47.8261	58.833	828.29	61.4083	49.4045	61.4861	57.9274
H3.02.41	2	1 h at 21°C	1 and 3	opr3	46.0432	33.8374	291.612	21.3655	117.199	103.931	261.627	54.2499	222.302	55.516	224.838	177.045	66.5828	118.834	375.601	75.0691	238.451	42.6683	74.7945	143.648	86.7142	82.0576	240.736	92.1749	307.402	89.403	461.421	101.211	220.76	71.0707	115.162	62.1156	101.211	71.4335	68.6434	189.115	104.689	137.574	37.7458	64.0023	873.056	40.3695	45.9233	54.4362	50.8269
H1.03.11	3	1 h at 38°C	2	opr3	45.2781	37.8199	320.303	14.9091	166.57	181.951	238.976	82.3546	285.725	69.0197	253.969	146.111	70.9255	175.664	306.708	103.186	255.462	77.2363	158.488	175.453	107.602	116.51	218.146	68.2589	221.717	96.132	390.725	111.35	148.605	87.7418	139.201	117.854	76.2556	68.4645	86.0353	135.666	118.495	89.0358	31.4443	61.1346	861.998	47.9187	43.3108	71.6929	49.2481
H1.03.48	3	1 h at 38°C	2	opr3	40.7687	39.014	377.778	18.7337	166.735	160.115	261.924	93.6114	217.676	68.8836	272.668	186.396	126.24	169.76	310.436	105.332	229.844	47.9896	111.414	129.609	100.021	119.846	245.638	80.2426	254.762	108.804	548.342	128.096	142.402	107.183	162.153	105.86	98.1094	62.183	72.862	134.246	89.3435	126.319	42.6731	66.5343	851.665	49.0291	45.2692	62.1952	56.7777
H1.03.52	3	1 h at 38°C	2	opr3	51.9215	34.9021	321.17	27.0344	177.461	174.448	232.188	66.4796	239.991	65.0922	271.09	166.525	83.6676	159.049	336.573	93.6645	301.478	64.0934	94.0764	150.891	94.4281	121.242	252.209	79.179	230.076	123.7	497.006	148.406	189.036	103.062	178.343	112.726	86.0042	76.4409	90.7081	156.622	111.429	111.801	47.5485	78.1918	714.873	51.0654	48.5238	73.1973	61.8111
H2.03.05	3	1 h at 38°C	2	opr3	63.9446	51.1196	426.787	32.1445	217.205	262.935	470.82	119.044	352.959	110.113	409.391	273.726	131.774	215.216	414.318	117.93	340.305	98.2954	152.362	179.925	162.568	162.739	317.07	98.4178	314.542	125.753	1025.56	204.445	312.776	130.27	204.246	162.018	114.633	104.801	120.277	226.901	183.778	153.281	76.9487	107.248	1523.82	89.3528	64.9951	96.1443	71.8539
H2.03.35	3	1 h at 38°C	2	opr3	59.1258	37.677	295.048	19.6916	161.869	177.91	366.054	61.4686	291.441	66.8656	333.152	164.466	70.7179	120.015	330.003	72.7793	281.141	58.3268	93.0529	140.598	132.549	121.021	307.248	73.9519	270.543	94.2598	819.689	150.528	317.232	112.665	195.614	139.698	100.506	95.4318	78.3012	196.474	126.919	117.245	35.3853	94.4748	1282.56	58.9145	53.3957	76.0767	50.3434
H2.03.44	3	1 h at 38°C	2	opr3	44.086	34.6304	396.153	22.3329	183.731	190.95	425.065	64.5345	275.694	74.617	358.018	155.867	78.8739	136.399	344.254	75.916	302.696	60.0423	109.837	155.938	107.923	140.774	266.037	73.9746	302.799	123.976	1007.52	160.986	282.88	104.159	187.382	131.967	106.096	82.3396	91.194	234.295	150.106	141.183	55.6595	75.5442	1081.41	46.844	52.742	75.9243	58.5012
H3.03.04	3	1 h at 38°C	2	opr3	36.6502	34.9661	994.418	21.7335	91.0188	89.5682	227.687	56.4435	190.934	50.1597	189.652	198.47	54.1164	106.224	365.6	57.8549	411.747	55.3194	71.1055	129.253	79.2372	83.8643	213.348	60.3936	235.249	82.7411	373.672	107.066	249.76	63.287	132.054	58.4873	69.9519	115.753	58.6966	169.472	95.2243	77.4943	39.858	48.3973	464.321	40.786	37.5982	51.1915	40.8543
H3.03.38	3	1 h at 38°C	2	opr3	41.139	29.4323	224.274	17.5158	117.148	110.651	259.615	59.0516	202.552	63.7306	226.141	200.805	68.1615	125.046	371.525	86.0246	312.308	50.7767	70.5435	131.454	93.9944	94.6278	238.146	124.186	244.28	81.8641	353.387	114.953	233.578	72.1184	129.216	77.8284	138.115	98.0291	71.6877	199.917	129.914	195.777	38.758	59.9027	558.763	42.107	39.2669	58.4424	45.7278
H3.03.41	3	1 h at 38°C	2	opr3	33.8263	27.5992	318.204	16.7166	109.894	90.6925	225.957	68.2201	196.362	54.0071	238.715	183.053	71.0414	106.876	334.987	75.8811	277.621	51.462	67.6373	100.466	84.9319	94.0931	207.235	102.144	196.326	87.4769	347.255	119.306	206.211	71.8934	122.12	80.8676	116.024	94.2953	63.1379	197.923	105.912	159.378	31.9698	44.1097	476.793	47.7046	35.0798	52.3973	42.6876
H1.04.11	4	12 h at 21°C	1 and 3	opr3	68.5023	49.4606	343.344	25.7772	185.778	240.427	316.723	98.2691	331.413	104.765	331.316	172.64	97.7151	166.925	293.555	100.12	352.254	43.4504	127.432	199.003	133.94	129.258	304.023	61.053	345.714	122.988	428.36	152.976	212.373	99.6384	246.484	157.823	101.546	102.179	100.235	216.071	121.667	105.155	38.1013	110.028	1687.3	59.8124	51.8503	76.0206	44.6455
H1.04.48	4	12 h at 21°C	1 and 3	opr3	77.8359	58.162	434.277	29.3893	200.449	244.847	232.406	84.2987	330.46	143.919	395.237	248.807	94.4438	141.06	320.493	110.931	403.278	71.6562	144.832	197.102	114.043	147.983	315.788	85.9629	483.997	140.902	453.183	151.978	250.757	114.454	212.21	132.232	114.482	106.827	106.662	200.248	151.388	144.657	44.3483	111.637	1850.62	69.0939	57.5164	82.6973	55.2177
H1.04.52	4	12 h at 21°C	1 and 3	opr3	70.2523	57.3487	395.524	35.826	221.742	261.703	292.565	105.511	352.068	133.526	415.312	264.111	115.847	192.454	367.871	111.353	439.074	87.2404	150.494	191.323	180.103	162.334	322.542	100.348	477.722	146.343	542.789	182.188	273.278	129.572	207.133	160.991	146.271	118.959	125.508	257.203	173.135	169.784	87.8051	132.524	1886.82	82.1882	63.2175	103.059	71.2598
H2.04.05	4	12 h at 21°C	1 and 3	opr3	79.3489	59.6353	684.948	32.4653	291.818	324.091	580.435	173.756	468.179	146.388	503.336	355.946	145.239	246.559	382.844	171.187	580.751	70.2903	245.181	249.739	214.61	188.251	482.177	120.129	443.877	207.93	1011.02	219.025	391.104	170.916	288.658	204.289	155.752	155.797	152.609	289.545	225.496	215.093	110.326	113.415	1482.57	109.685	82.7904	120.476	104.496
H2.04.35	4	12 h at 21°C	1 and 3	opr3	79.3685	54.8576	569.785	39.0452	234.854	236.969	472.187	119.311	361.008	124.16	474.705	337.985	102.279	181.675	376.498	122.116	558.504	93.4514	169.516	178.598	184.104	165.701	374.172	108.007	427.47	175.849	987.874	224.796	421.378	140.759	229.542	162.977	151.395	160.521	140.267	327.582	221.719	205.474	72.6503	139.444	1805.22	96.6166	80.1893	106.062	109.502
H2.04.44	4	12 h at 21°C	1 and 3	opr3	77.9065	50.671	402.813	36.0089	218.893	201.195	469.346	94.5933	340.102	114.74	458.836	272.275	115.085	188.331	337.803	104.095	507.129	71.6008	165.787	192.994	176.005	146.203	310.318	111.061	390.232	156.772	869.231	219.218	405.049	142.347	271.186	141.284	132.669	164.454	125.185	274.54	194.936	161.268	101.692	108.551	1413.25	102.405	70.5019	105.47	88.931
H3.04.04	4	12 h at 21°C	1 and 3	opr3	59.1332	33.5248	211.913	19.6928	109.504	113.554	222.56	55.6468	205.229	69.996	248.424	205.733	45.8785	71.3615	324.82	52.8641	487.525	48.1747	74.8901	124.275	87.0795	99.4026	252.375	74.2664	311.697	82.1676	368.532	137.65	270.229	83.3936	159.465	66.1702	73.9403	159.646	84.4758	287.719	127.893	92.7087	37.7904	106.659	1032.44	53.2258	44.7376	58.3981	37.4666
H3.04.38	4	12 h at 21°C	1 and 3	opr3	73.8234	39.517	268.833	20.9523	109.394	117.385	182.049	55.6595	197.604	72.6028	266.33	222.996	49.8797	61.873	301.32	40.9783	590.493	60.1368	68.7275	144.613	74.2076	100.631	273.125	83.4246	290.161	72.331	395.77	165.198	295.399	71.7616	163.727	78.8974	100.378	171.577	72.6533	246.408	125.845	110.402	61.2435	92.2062	1016.07	51.8486	44.2745	54.4639	36.6965
H3.04.41	4	12 h at 21°C	1 and 3	opr3	63.359	38.1055	222.114	15.4846	97.9108	98.7605	201.743	50.6093	206.488	65.2942	236.97	248.983	38.6771	62.6782	286.752	35.1305	669.35	45.1366	63.9432	155.834	80.1916	87.2401	248.988	100.459	239.148	70.1848	387.696	133.684	303.335	64.1409	191.297	68.7443	106.337	175.82	83.3868	239.214	121.372	133.163	47.1102	90.9858	904.121	49.6828	42.3927	50.9906	33.7537
H1.05.11	5	12 h at 38°C	2	opr3	32.5372	22.651	174.226	15.4338	118.584	168.361	203.131	46.2853	150.248	158.809	175.915	93.6	39.5979	81.1965	231.756	37.1347	133.497	24.9737	74.2734	122.127	65.13	110.673	313.988	30.9194	142.768	43.6432	396.809	93.3745	112.346	65.6541	99.4525	57.5302	41.2523	69.8656	56.8738	327.074	54.1626	55.0982	17.1396	63.9838	676.343	19.7119	22.2863	42.1716	19.7594
H1.05.48	5	12 h at 38°C	2	opr3	32.6964	27.7241	158.97	16.2149	117.798	115.074	215.912	49.6071	140.442	152.378	161.738	94.7785	22.4671	58.6205	277.804	20.0805	105.482	20.5419	50.0708	74.6732	99.6224	112.431	282.128	38.2979	110.911	46.5027	461.31	80.0198	111.808	63.4589	99.303	57.37	41.0857	82.199	60.9378	411.819	53.616	56.7465	22.0611	81.5535	737	22.2365	25.6611	36.3676	19.4241
H1.05.52	5	12 h at 38°C	2	opr3	23.1854	22.9504	106.593	15.8283	116.385	125.943	173.153	49.7896	108.983	173.071	124.754	83.0221	24.837	60.0699	116.369	33.0239	66.7078	30.8508	48.48	57.0963	55.5859	112.651	163.463	31.9363	122.089	45.7835	270.272	66.4807	89.4623	63.335	79.8143	58.6448	43.4826	45.0707	55.7007	184.053	46.4418	51.3182	32.6896	38.6928	511.938	33.1208	20.7094	32.1627	22.9853
H2.05.05	5	12 h at 38°C	2	opr3	76.6718	59.0195	383.6	34.6553	227.341	267.044	480.545	98.2258	411.49	256.58	488.119	331.198	116.312	249.573	486.635	149.293	456.02	90.4727	189.255	214.302	239.893	203.866	514.224	96.3892	371.644	159.892	938.041	258.759	398.001	170.955	235.164	181.967	133.809	175.502	139.742	719.164	212.222	177.892	104.328	111.464	1370.65	106.398	85.1684	115.157	108.945
H2.05.35	5	12 h at 38°C	2	opr3	95.7544	60.3705	344.781	43.5754	257.878	285.059	468.213	104.983	492.115	327.333	608.066	473.175	141.659	321.179	491.019	173.339	629.538	85.13	205.102	287.55	248.927	255.305	672.165	149.983	531.919	189.452	1003.81	310.275	490.003	210.606	368.899	217.807	220.398	205.726	156.932	715.105	308.182	246.643	116.215	135.417	1763.94	101.072	113.176	136.248	143.505
H2.05.44	5	12 h at 38°C	2	opr3	72.5806	55	472.995	34.7191	197.637	223.185	390.936	135.561	483.532	273.996	497.245	409.279	139.666	289.721	516.201	152.751	489.935	68.8475	140.975	235.37	178.121	218.914	639.052	192.754	469.345	161.092	1062.67	258.738	335.777	177.82	252.739	174.087	231.063	187.394	110.514	762.452	246.676	321.477	105.248	85.993	1602.42	83.1828	80.357	108.457	131.799
H3.05.04	5	12 h at 38°C	2	opr3	46.9791	36.0086	325.37	23.4141	117.06	126.38	222.763	62.7104	279.496	156.518	246.276	311.201	72.4875	148.895	448.183	88.7771	560.219	68.4744	77.9358	139.505	121.938	140.232	365.339	82.3489	341.237	88.7328	456.134	160.438	307.299	82.5873	180.972	72.9251	80.1841	190.743	82.6052	487.095	117.497	77.9516	49.6919	89.6653	687.711	55.1419	48.9474	60.7219	49.5484
H3.05.38	5	12 h at 38°C	2	opr3	50.7831	36.7049	175.256	18.9293	126.361	129.154	249.607	52.8614	292.553	160.885	286.122	309.422	78.7409	181.592	487.48	115.075	603.882	71.7074	90.8075	154.352	111.668	154.711	381.971	89.0365	361.241	92.8486	669.557	165.052	326.255	104.181	199.799	78.7757	96.1127	173.06	92.164	481.302	138.379	108.346	50.6549	82.3496	779.382	60.2425	47.3838	63.4414	71.3643
H3.05.41	5	12 h at 38°C	2	opr3	54.9847	41.5694	197.958	28.2225	126.843	133.742	388.754	71.1208	265.835	167.526	268.965	303.082	97.9714	180.759	533.243	114.631	564.49	64.2363	113.224	131.067	105.483	150.259	402.056	121.3	322.215	91.9104	614.966	209.93	247.208	84.2519	207.897	61.7789	116.342	157.196	89.3511	585.713	106.285	156.971	53.5227	72.2254	710.224	58.784	51.9542	62.6323	68.7058
H1.06.11	6	13 h at 21°C	1	opr3	28.3657	19.4567	147.304	10.3169	77.3927	151.284	155.985	36.2441	120.672	158.362	143.091	59.6215	24.6705	41.9482	148.232	25.9398	83.0566	19.768	45.2291	72.6795	41.1439	99.9538	182.8	29.5754	121.426	34.0324	282.1	75.4371	111.449	51.9905	77.2458	37.9123	41.5498	36.1045	51.8763	130.379	47.862	47.192	23.6289	37.559	704.278	23.5756	21.0288	33.0879	11.7632
H1.06.48	6	13 h at 21°C	1	opr3	21.234	18.7909	79.6462	11.5321	59.7488	116.363	156.23	14.3751	98.7537	232.019	114.238	42.8426	16.6168	39.9786	110.531	12.479	58.2069	20.6627	50.1523	74.7426	33.1307	99.5071	133.965	16.7858	117.502	35.878	217.768	50.1656	96.3747	35.1426	54.39	44.8762	32.4427	29.1262	44.1059	104.071	41.964	33.027	28.4138	40.1417	482.098	16.3476	21.9651	33.6606	11.727
H1.06.52	6	13 h at 21°C	1	opr3	23.9316	23.9752	108.795	11.011	59.1883	97.3831	166.223	41.4031	110.754	115.816	113.257	70.0275	15.6328	29.8469	115.084	27.5423	66.1685	8.31469	39.1901	58.5729	39.9363	92.3379	123.807	31.9411	113.125	34.9044	272.469	43.1117	121.057	40.4402	71.7034	37.9118	39.8314	29.07	46.8552	94.9075	46.7694	72.9417	30.3746	36.3357	510.92	16.0676	23.7212	26.1325	18.6051
H2.06.05	6	13 h at 21°C	1	opr3	56.1137	39.5945	441.309	23.1535	172.077	192.936	321.553	102.741	342.225	98.9866	387.768	209.287	102.599	171.841	266.281	120.092	416.8	71.5783	140.675	140.721	140.404	111.199	385.953	69.3518	273.748	122.388	775.894	177.682	326.034	113.222	261.93	134.739	102.724	161.535	89.9645	153.646	186.713	113.769	54.009	50.3588	769.087	54.5051	54.8225	80.9097	70.875
H2.06.35	6	13 h at 21°C	1	opr3	63.8941	46.8585	528.298	31.8268	175.808	214.795	357.992	144.178	405.906	105.845	487.544	267.994	119.044	197.553	302.28	128.771	464.784	86.21	157.274	227.943	167.005	130.344	435.78	137.502	310.164	140.82	924.018	216.569	372.407	130.902	320.532	149.183	174.769	168.867	107.685	225.726	232.508	203.6	96.3493	80.3355	1418.02	92.309	69.5307	97.3304	82.5122
H2.06.44	6	13 h at 21°C	1	opr3	49.2719	31.0723	450.674	22.2428	155.607	182.971	367.755	122.674	315.713	86.2176	421.13	264.325	72.2055	209.745	284.14	96.5083	488.755	87.0922	112.75	190.882	153.985	122.622	433.872	89.4464	289.875	121.653	917.863	175.917	334.16	99.8277	280.366	125.831	101.686	162.507	92.1435	205.179	195.94	109.85	54.2269	60.0004	972.277	59.3661	61.1809	81.7647	66.2208
H3.06.04	6	13 h at 21°C	1	opr3	38.216	27.5477	156.482	16.5961	111.506	96.625	228.529	50.6951	180.519	59.0948	222.09	214.335	59.0993	102.511	306.335	61.3402	655.821	47.4772	70.7714	127.189	93.064	87.8184	295.365	88.6347	222.972	79.9552	484.139	125.471	311.007	75.8578	163.018	64.1089	90.7534	184.768	74.0918	188.306	114.397	131.933	40.0697	53.0372	485.385	42.923	45.9688	49.5712	48.4813
H3.06.38	6	13 h at 21°C	1	opr3	48.2135	34.3482	236.786	16.6865	113.092	101.436	228.61	46.594	198.611	57.8908	249.448	221.493	56.0624	115.391	367.774	62.7289	812.696	59.696	68.2973	121.063	107.384	92.4069	342.139	108.435	297.963	88.656	574.566	161.358	373.041	81.8082	227.048	73.9035	107.468	248.394	82.9616	229.693	144.072	105.53	35.7016	66.3708	612.213	44.4088	53.5223	60.4329	55.7713
H3.06.41	6	13 h at 21°C	1	opr3	48.5783	34.8005	298.877	15.8682	105.418	93.3336	212.995	46.7685	183.135	59.5165	227.919	210.318	42.4878	104.401	317.144	60.3683	573.724	46.5946	69.8076	130.116	88.9679	91.4412	266.07	70.3763	316.985	84.0036	494.758	137.057	293.124	81.1725	164.259	70.8688	80.519	153.836	69.4967	216.645	119.408	84.7903	47.837	58.548	583.229	43.1479	47.9563	56.3089	51.1016
H1.07.11	7	12 h at 21°C, 1 h at 45°C	3	opr3	48.039	40.148	280.641	26.9972	131.703	181.835	291.08	102.826	213.513	79.7236	262.147	208.276	85.2199	139.282	353.855	106.686	225.136	43.6177	82.0372	110.231	93.8507	127.029	247.209	119.193	302.286	110.565	601.498	137.152	222.451	90.3439	164.696	91.926	112.433	89.1042	79.5199	206.211	130.551	163.273	39.0008	85.9022	1211.64	46.7626	44.1654	99.7079	51.9507
H1.07.48	7	12 h at 21°C, 1 h at 45°C	3	opr3	46.1412	32.3416	190.771	22.7642	111.06	164.354	228.354	65.1202	206.579	75.7637	218.513	126.491	66.0115	95.745	232.421	80.6488	166.362	44.1782	77.0513	119.584	70.4766	105.018	205.997	72.8944	205.912	80.0926	432.822	103.55	164.44	70.0457	177.972	85.3862	92.3188	61.5542	57.2763	137.611	83.7678	121.028	52.7984	67.1618	824.611	33.1449	33.2075	61.2868	33.1791
H1.07.52	7	12 h at 21°C, 1 h at 45°C	3	opr3	36.4956	21.5384	127.511	11.9671	93.2638	141.604	186.18	29.0153	149.489	135.968	142.671	88.3878	30.6744	40.7299	181.616	16.4582	85.4752	22.3525	51.5867	87.0843	60.4998	111.368	211.701	37.1103	181.725	33.9606	342.006	98.0484	141.323	50.237	102.977	40.0629	39.6977	41.5784	48.2092	189.657	53.6683	62.0542	15.8106	33.2376	630.523	17.3172	18.4425	31.6902	20.3096
H2.07.05	7	12 h at 21°C, 1 h at 45°C	3	opr3	78.2205	46.0308	401.14	28.935	206.121	210.785	400.705	154.992	412.924	107.891	453.17	389.339	153.36	276.542	408.139	177.037	549.144	95.7394	164.689	224.818	176.496	174.94	531.831	101.297	344.788	125.16	1090.56	226.152	340.7	133.938	288.359	183.08	125.883	155.167	125.242	293.936	177.577	161.428	67.51	87.7658	1468.06	73.3093	66.7483	93.9355	70.7744
H2.07.35	7	12 h at 21°C, 1 h at 45°C	3	opr3	66.7929	41.268	408.165	20.0624	160.729	189.935	348.688	94.6053	346.451	96.4484	388.017	347.332	101.256	229.371	395.391	151.231	455.433	70.5174	113.267	190.726	143.196	161.962	441.938	75.6567	364.482	120.516	1028.59	209.902	358.984	136.575	233.259	140.162	98.5996	106.505	88.9953	230.253	154.455	100.305	49.7039	106.166	1632.53	67.7391	55.511	84.2783	71.8571
H2.07.44	7	12 h at 21°C, 1 h at 45°C	3	opr3	69.1874	55.2938	484.225	28.5728	193.86	198.412	346.692	99.6098	375.194	109.566	387.119	345.714	128.327	254.407	408.512	154.431	434.381	60.5696	136.816	208.004	163.234	195.585	471.624	62.6703	352.733	128.819	851.17	192.281	358.057	163.754	255.102	148.041	96.8023	124.611	109.996	294.474	154.283	111.429	63.1461	97.1358	1552.82	59.6776	69.7222	100.921	79.0512
H3.07.04	7	12 h at 21°C, 1 h at 45°C	3	opr3	45.0099	30.0824	142.795	18.2051	96.4364	106.042	184.22	41.4635	198.562	65.9305	216.932	185.331	51.4078	78.1294	346.665	62.5144	536.658	34.4424	54.522	99.7103	84.5848	99.374	324.316	75.0394	232.06	65.7076	509.01	144.163	280.152	72.0111	185.641	65.2548	81.1329	158.508	64.5238	339.953	113.53	83.7782	30.078	54.5123	559.726	41.6879	41.0837	46.5972	38.7678
H3.07.38	7	12 h at 21°C, 1 h at 45°C	3	opr3	56.7523	31.588	210.101	19.1126	96.9953	104.513	221.382	52.6941	213.666	69.4316	222.495	205.38	49.5189	81.0908	391.815	51.3981	552.218	44.1803	63.7537	113.658	84.0413	108.163	331.772	77.6871	222.127	65.5588	572.774	149.59	293.997	70.941	180.752	63.7903	82.8737	157.982	73.1562	335.565	114.091	90.7222	32.82	57.085	601.363	52.3806	35.0696	50.9835	40.9088
H3.07.41	7	12 h at 21°C, 1 h at 45°C	3	opr3	48.1864	32.8733	262.589	18.8654	128.287	122.253	256.875	60.5734	235.857	85.9842	277.584	258.665	93.9293	167.109	335.235	87.348	526.414	60.3722	94.8528	178.232	119.62	130.024	319.551	89.2563	245.396	125.187	593.197	160.931	288.474	89.7593	178.095	82.6811	97.5427	150.04	83.4497	302.822	128.145	108.132	46.5743	67.9578	461.376	52.6288	57.6021	61.3859	60.3106
H1.08.11	8	12 h at 38°C, 1 h at 45°C	2	opr3	54.2647	55.6282	340.314	37.5058	201.623	261.643	240.08	119.717	465.143	229.642	367.693	294.701	119.963	278.114	700.028	174.527	379.424	59.9893	152.021	138.572	170.805	223.396	777.328	173.229	363.227	148.186	882.244	191.37	221.97	138.269	241.647	142.847	129.204	203.643	114.595	928.77	181.786	154.666	74.6024	98.4265	1071.09	57.8203	63.3658	89.6374	69.4573
H1.08.48	8	12 h at 38°C, 1 h at 45°C	2	opr3	83.1088	59.0818	379.191	38.0171	265.299	349.714	316.63	198.123	615.692	299.88	509.971	439.092	150.249	377.661	936.073	254.288	492.353	76.5241	212.45	273.023	274.311	296.425	1146.19	131.197	511.006	188.748	1153.91	360.821	314.091	198.679	361.654	187.445	178.098	269.582	156.005	1364.99	296.527	223.415	165.252	162.72	1490	108.327	108.708	121.425	95.8063
H1.08.52	8	12 h at 38°C, 1 h at 45°C	2	opr3	61.6735	36.8579	199.401	25.3342	156.297	203.72	175.748	117.219	406.549	215.762	312.236	260.758	74.5043	192.711	688.039	128.394	280.989	67.5464	114.975	192.211	223.681	186.24	817.657	68.5121	408.306	107.211	814.185	177.411	173.775	130.866	178.035	112.63	93.9961	159.244	92.7929	995.556	121.315	136.171	67.9956	106.42	1199.77	91.3606	44.8482	64.6055	53.7133
H2.08.05	8	12 h at 38°C, 1 h at 45°C	2	opr3	35.1327	28.5747	262.204	19.7795	138.371	144.641	253.139	45.6852	249.926	132.259	241.26	198.034	82.1959	154.718	405.413	89.3229	352.13	39.7312	88.3511	158.186	94.9248	120.399	441.357	79.3929	290.494	91.1163	543.544	121.446	212.993	74.4988	164.784	79.1923	73.6985	134.21	77.5	516.817	154.427	107.733	40.1086	51.7634	718.078	49.0032	44.2587	56.8783	54.063
H2.08.35	8	12 h at 38°C, 1 h at 45°C	2	opr3	NA	NA	NA	NA	NA	NA	NA	NA	NA	NA	NA	NA	NA	NA	NA	NA	NA	NA	NA	NA	NA	NA	NA	NA	NA	NA	NA	NA	NA	NA	NA	NA	NA	NA	NA	NA	NA	NA	NA	NA	NA	NA	NA	NA	NA
H2.08.44	8	12 h at 38°C, 1 h at 45°C	2	opr3	41.0839	27.7666	216.332	25.7789	153.961	117.568	353.675	44.1136	266.783	157.323	252.937	247.43	91.7614	179.793	411.121	112.342	411.135	41.2963	107.019	142.271	130.561	161.925	455.822	85.7744	378.407	95.5484	533.253	157.163	251.345	78.025	228.742	73.0795	88.6934	148.202	80.8987	514.198	127.223	101.35	44.0757	55.1558	832.649	48.3999	47.3643	57.4809	55.5787
H3.08.04	8	12 h at 38°C, 1 h at 45°C	2	opr3	47.5925	37.1727	475.967	23.9988	113.397	105.799	193.453	50.6417	227.37	154.581	243.579	255.2	69.5787	125.126	484.249	81.3249	496.84	53.8419	106.594	173.247	116.816	117.71	447.991	128.733	295.81	87.1071	654.538	177.401	288.603	88.1687	188.041	83.1662	143.946	176.558	86.7815	648.473	140.006	171.516	67.0262	67.7805	460.568	53.7181	53.5626	54.6053	56.3407
H3.08.38	8	12 h at 38°C, 1 h at 45°C	2	opr3	41.4965	32.4457	193.037	17.6035	120.635	101.866	220.498	61.2245	240.068	139.698	243.216	285.111	74.6345	142.5	483.229	89.2052	643.669	64.431	77.5988	169.688	110.551	114.176	433.836	134.143	312.851	92.381	716.771	164.548	283.471	83.0407	203.269	66.7671	140.871	196.182	79.8123	571.54	134.929	188.664	52.9042	61.6108	489.135	56.4545	52.6351	54.8626	59.2379
H3.08.41	8	12 h at 38°C, 1 h at 45°C	2	opr3	44.9297	36.9682	454.898	22.9899	120.287	112.095	264.823	81.6819	322.022	157.887	287.337	335.23	78.5952	151.01	480.366	92.9765	573.187	64.9034	109.357	209.792	118.764	139.115	560.444	117.756	307.036	99.8952	815.789	187.31	323.405	92.0983	202.42	73.9655	125.35	161.327	91.3586	638.089	140.686	158.488	50.1236	60.4383	534.147	67.7868	63.4602	62.23	57.7961
H1.09.11	9	16 h at 21°C	1	opr3	32.2124	31.7595	246.665	18.0352	83.5654	145.901	154.11	35.1409	164.357	83.9878	189.291	123.693	34.4721	55.0523	234.433	27.2129	109.514	43.4719	59.8424	122.981	73.5674	78.2087	206.094	58.8103	207.396	53.878	410.015	94.0303	133.676	55.2852	113.163	55.6259	54.3312	48.5308	44.7789	186.13	63.3375	52.2157	37.291	73.4595	966.989	26.9111	21.4566	45.7408	18.349
H1.09.48	9	16 h at 21°C	1	opr3	31.2547	15.1448	130.048	14.4781	68.3278	94.8851	121.101	32.7397	137.47	63.018	107.259	66.3543	26.8521	27.1666	136.353	30.7459	68.4391	27.3531	54.1816	69.5495	39.7745	73.2684	150.493	41.3599	98.8167	47.7185	286.82	56.0773	113.91	46.6833	72.8808	36.8348	47.0818	34.4764	41.0648	140.431	63.7697	61.0261	22.2742	52.077	592.618	25.8427	23.541	32.6047	16.9688
H1.09.52	9	16 h at 21°C	1	opr3	45.6303	34.7851	171.56	15.0307	81.2966	131.096	119.736	49.115	192.49	98.5842	175.784	109.741	34.5605	82.2767	215.098	36.9714	119.496	16.4472	59.3768	121.756	68.2786	72.5335	218.872	73.9772	205.65	51.5004	361.177	91.7656	168.019	34.3736	131.1	59.1138	60.4503	53.3192	66.9641	178.718	101.996	87.6061	20.8948	59.2765	978.391	29.7112	40.2546	46.2162	21.9399
H2.09.05	9	16 h at 21°C	1	opr3	41.3849	31.2655	265.213	16.7416	118.795	167.797	252.884	71.9618	229.148	68.8512	240.196	141.221	64.652	116.219	273.13	65.7267	271.217	34.9965	86.423	121.43	90.5049	87.6767	292.4	87.3462	185.997	83.7772	658.566	109.973	197.844	53.174	166.138	92.2884	82.0981	85.3931	62.1205	165.55	110.384	110.205	36.589	53.4628	840.98	37.7978	40.5839	51.5444	40.6896
H2.09.35	9	16 h at 21°C	1	opr3	41.1507	31.1913	339.772	19.5082	137.099	163.835	271.607	60.266	244.55	61.5463	246.557	187.94	70.7471	100.481	297.454	69.4608	328.862	44.0248	84.4274	158.45	99.3222	94.5049	320.5	75.8449	250.871	90.3277	650.977	115.627	233.286	79.9821	168.908	83.6293	94.1099	90.1265	82.9014	169.325	115.012	133.338	54.6726	73.498	809.047	47.3367	43.3671	59.2654	52.3593
H2.09.44	9	16 h at 21°C	1	opr3	35.4448	29.5203	296.95	19.739	124.456	134.163	277.826	52.1197	202.46	60.5514	234.263	179.023	65.2471	100.439	294.036	65.2073	422.197	46.0696	87.3789	131.297	90.5296	94.7714	332.73	62.1456	247.122	94.2955	681.435	114.725	237.399	63.7773	188.66	86.555	77.0104	112.787	82.1841	167.773	148.544	102.563	42.5302	50.622	674.585	50.7665	47.6661	60.7992	57.2178
H3.09.04	9	16 h at 21°C	1	opr3	82.8613	49.9858	173.256	19.3422	109.391	119.047	193.639	58.802	229.236	71.2221	261.749	279.608	51.4953	91.0535	471.465	66.7288	607.333	46.3367	89.3334	152.308	86.6121	95.9355	324.742	76.1758	332.238	78.3704	556.865	148.318	361.947	83.6224	205.092	78.3149	101.404	150.408	87.0629	290.415	132.982	123.949	42.2065	151.627	1329.39	63.6363	51.4137	62.1147	42.6038
H3.09.38	9	16 h at 21°C	1	opr3	62.0525	39.1717	160.887	15.2408	89.9119	121.221	176.467	32.0508	231.936	66.602	253.994	277.08	39.2385	91.6608	391.568	57.694	725.544	54.3106	80.5209	143.015	92.985	96.7067	335.034	67.0203	262.385	65.2315	417.604	226.168	296.292	76.8785	208.267	68.521	78.693	242.401	88.5098	311.7	125.04	89.3842	52.8859	90.8859	961.676	60.3611	45.9876	58.6619	51.3545
H3.09.41	9	16 h at 21°C	1	opr3	58.1009	31.7424	134.832	13.8356	83.3597	110.307	177.403	45.2635	234.611	57.3661	244.75	127.774	42.3508	61.9971	302.514	44.7212	388.93	43.0835	62.393	138.348	75.528	73.3733	289.031	59.4758	207.014	59.1843	460.641	114.487	331.089	48.1089	171.575	57.8638	72.5695	151.737	65.1152	207.189	109.48	85.8539	51.8541	69.7183	847.899	44.3404	42.4572	44.4851	32.4056
H1.10.11	10	12 h at 21°C, 4 h at 45°C	3	opr3	55.6969	84.4051	824.128	50.9106	259.22	293.495	360.668	132.163	334.612	127.965	391.011	485.615	261.464	268.243	408.823	224.043	317.944	128.238	162.942	188.584	177.924	230.933	281.743	148.241	485.747	183.921	403.733	180.019	268.662	126.623	201.603	188.14	150.939	129.031	143.727	312.412	190.021	176.918	85.6577	112.553	1088.22	89.2355	101.238	120.76	95.812
H1.10.48	10	12 h at 21°C, 4 h at 45°C	3	opr3	36.4287	21.7542	104.259	13.7391	136.329	115.866	190.615	61.5953	160.824	196.899	129.364	54.5317	36.144	71.4653	146.974	28.1805	86.3474	17.8978	54.5008	61.5845	52.5008	100.663	176.436	36.0972	189.503	51.5972	191.386	120.535	105.2	57.0888	89.8588	46.9908	41.2913	37.4606	44.5764	205.307	31.9398	52.7249	21.3431	41.8151	551.297	20.8099	20.9464	27.3941	26.3083
H1.10.52	10	12 h at 21°C, 4 h at 45°C	3	opr3	52.289	36.6646	205.688	16.0057	162.156	155.392	247.189	72.2514	272.749	85.5241	245	240.482	100.072	278.661	513.649	175.885	216.934	43.327	100.458	134.274	115.056	151.482	387.914	87.5463	376.621	91.8185	336.327	132.567	250.486	108.096	194.558	78.9104	84.1744	96.5093	81.3533	354.314	122.371	118.076	56.5579	87.6506	1174.39	50.4781	51.0223	71.1853	67.5088
H2.10.05	10	12 h at 21°C, 4 h at 45°C	3	opr3	51.324	44.5171	329.055	42.0821	193.46	204.587	277.978	106.845	288.888	99.7947	326.883	254.35	117.843	290.397	533.176	160.633	380.369	78.5468	143.649	174.481	154.16	182.899	370.164	114.452	259.869	110.994	570.868	183.342	227.256	96.8865	253.698	128.396	120.294	112.842	95.0667	263.482	142.5	136.986	63.3486	86.0406	1320.88	81.9194	57.083	86.2258	66.8383
H2.10.35	10	12 h at 21°C, 4 h at 45°C	3	opr3	42.6434	33.6486	249.264	16.5362	162.372	175.438	259.705	73.9859	289.558	90.574	345.711	292.744	120.7	269.415	573.128	184.331	464.622	51.332	113.091	167.615	136.169	164.256	373.182	120.078	364.064	99.2526	649.306	164.579	318.722	105.939	236.963	108.06	105.854	116.563	84.42	269.349	137.593	121.406	61.2029	96.6657	1317.55	66.3013	52.3265	79.4939	75.5616
H2.10.44	10	12 h at 21°C, 4 h at 45°C	3	opr3	51.83	39.3127	205.601	19.3294	159.201	177.411	228.691	72.2183	277.321	97.6431	315.715	231.095	128.61	292.404	502.504	189.134	333.155	61.0331	130.735	158.568	117.171	166.504	324.523	126.428	346.113	102.389	531.71	171.902	302.805	92.1053	224.844	112.472	125.564	94.4195	87.8323	226.701	137.132	167.038	41.7526	76.4352	1149.19	67.3732	58.4611	72.4164	61.4577
H3.10.04	10	12 h at 21°C, 4 h at 45°C	3	opr3	56.1029	52.5729	375.258	29.3166	271.946	183.3	327.156	73.5856	366.907	236.432	349.867	537.37	136.89	388.083	759.966	246.341	603.143	68.2691	133.243	188.467	234.229	240.12	664.931	121.673	403.337	123.212	663.791	686.083	373.562	138.492	487.353	77.3323	117.559	174.044	118.302	720.667	123.249	155.202	68.0648	92.3644	814.513	81.5895	66.9728	89.5281	84.4813
H3.10.38	10	12 h at 21°C, 4 h at 45°C	3	opr3	49.4829	43.6422	230.566	24.7927	224.977	170.205	325.752	54.9652	419.247	192.822	335.877	539.124	137.983	378.196	782.061	232.087	783.741	68.9554	130.17	204.826	194.115	186.937	724.516	111.265	376.3	99.8984	791.318	529.148	430.917	111.372	399.744	80.4486	103.686	190.381	107.779	738.432	139.619	113.195	66.4791	90.968	838.629	70.4345	66.9545	76.3995	81.4991
H3.10.41	10	12 h at 21°C, 4 h at 45°C	3	opr3	46.9419	35.3005	428.3	21.3397	177.958	157.431	297.742	75.3336	365.668	147.148	287.793	466.794	108.245	295.013	697.167	182.854	630.688	53.4197	121.28	212.095	111.701	156.528	662.075	97.6037	335.383	95.9549	724.08	294.887	356.348	103.101	336.717	72.1703	104.39	156.81	98.8655	653.606	106.898	99.3651	58.7859	59.72	721.675	71.6674	47.2989	68.2769	61.9169
H1.11.11	11	12 h at 38°C, 4 h at 45°C	2	opr3	38.341	20.7828	186.61	34.3533	115.138	136.145	349.255	86.4376	262.687	210.365	202.955	156.367	25.7805	97.0545	612.817	45.4075	219.188	29.402	66.4385	113.271	146.675	150.869	1095.07	52.0621	225.072	51.847	753.163	99.5146	162.249	62.0096	215.422	63.234	62.6316	196.882	63.35	1473.93	74.7551	88.7377	41.5563	60.223	866.654	44.484	26.143	36.8788	29.0908
H1.11.48	11	12 h at 38°C, 4 h at 45°C	2	opr3	52.3772	31.4458	239.726	16.3702	126.735	191.656	207.174	83.4941	279.833	240.326	251.028	139.502	41.5229	109.223	637.936	60.0247	189.687	33.5314	70.279	118.126	146.79	205.451	1025.52	51.5048	289.053	67.7479	842.528	93.2223	156.144	89.5428	122.561	68.0297	69.2625	182.3	79.2684	1342.87	68.9593	99.9609	52.3174	82.0531	1083.93	40.0924	34.1488	43.8896	37.1244
H1.11.52	11	12 h at 38°C, 4 h at 45°C	2	opr3	58.1824	32.168	232.814	22.8835	142.124	185.126	251.678	108.491	305.786	232.67	280.192	185.616	67.9026	150.899	637.398	60.3165	230.984	27.8159	71.1381	90.9826	192.592	209.825	824.324	99.0499	331.729	81.5144	686.745	147.942	169.408	99.3475	151.488	79.0052	83.3861	191.19	67.4744	1187.02	77.4343	98.1234	62.4688	104.143	977.591	48.6116	36.6032	48.352	34.9678
H2.11.05	11	12 h at 38°C, 4 h at 45°C	2	opr3	39.8455	32.8867	266.517	20.9082	132.573	160.78	233.249	71.7783	243.062	151.947	297.763	242.932	91.6737	191.41	455.591	109.492	424.58	46.9521	82.0707	134.624	138.783	156.451	516.432	103.295	315.598	91.216	705.454	144.545	217.968	86.1412	195.671	92.928	116.106	153.15	87.0632	599.839	133.032	148.353	55.6588	58.4868	784.743	60.5851	46.368	56.4287	50.1869
H2.11.35	11	12 h at 38°C, 4 h at 45°C	2	opr3	38.122	39.9182	277.36	19.6337	172.247	168.768	251.038	71.5212	296.008	171.954	321.081	310.838	103.753	204.985	518.986	126.857	458.655	50.6863	102.085	167.1	148.866	213.113	546.692	85.4054	452.232	108.005	663.812	173.896	250.986	102.362	204.075	79.9062	90.9551	166.056	93.6634	641.665	117.997	105.51	62.0535	83.8205	878.771	57.2932	52.8533	71.8279	56.0608
H2.11.44	11	12 h at 38°C, 4 h at 45°C	2	opr3	42.1423	30.3158	284.269	27.9106	146.973	164.648	303.051	84.252	304.792	154.971	312.007	264.226	94.6078	187.021	477.519	128.491	415.882	49.0739	112.053	178.901	116.597	190.838	493.635	137.548	404.287	90.8647	584.841	178.315	245.086	93.5963	220.799	112.273	132.394	145.861	80.8483	544.485	122.588	173.119	63.4021	73.5897	981.44	55.4999	51.0525	64.8138	57.8012
H3.11.04	11	12 h at 38°C, 4 h at 45°C	2	opr3	48.4695	37.5223	179.826	21.5957	1754.37	182.954	1142.67	86.2883	449.411	2322.62	747.096	569.628	133.635	441.359	930.856	205.467	694.296	80.6825	281.976	298.818	968.855	203.916	1319.33	99.267	605.503	132.313	884.323	9999.86	2240.44	162.446	4732.25	85.9249	124.423	220.636	122.737	1079.77	152.385	114.022	69.2807	106.86	847.116	78.4763	74.0828	83.5561	90.2166
H3.11.38	11	12 h at 38°C, 4 h at 45°C	2	opr3	45.2945	38.3291	203.193	25.5582	4972.1	173.787	2708.36	89.5461	469.326	9161.14	1965.72	564.366	109.201	588.594	979.288	134.979	635.059	73.2293	490.013	360.437	2173.37	217.126	1913.63	110.318	542.658	144.01	845.588	33186.8	4433.77	228.213	15268	107.89	176.952	277.282	123.621	1209.46	153.805	131.116	63.0249	111.375	678.899	56.9135	73.5292	85.4176	98.3488
H3.11.41	11	12 h at 38°C, 4 h at 45°C	2	opr3	45.6028	33.5837	163.244	18.0943	474.056	159.557	543.263	85.8347	346.595	732.555	410.672	519.348	104.97	342.851	838.156	193.261	824.651	61.7217	137.525	168.029	319.085	184.635	941.542	97.8594	527.246	108.109	909.64	2035.31	666.148	126.85	1096.34	95.6627	116.511	222.534	116.18	1242.79	150.105	106.984	66.5677	93.9775	848.517	76.5928	60.7774	73.0602	77.5591
H1.12.11	12	17 h at 21°C	1	opr3	88.0922	62.6365	326.664	29.359	164.643	195.184	302.094	99.4816	265.898	82.0244	339.654	211.549	83.8185	143.275	390.38	102.915	467.257	67.3207	112.004	132.741	130.118	129.483	329.138	137.703	325.842	145.939	482.305	160.676	303.531	117.382	266.822	116.666	131.202	152.618	114.11	244.621	163.899	157.88	82.5987	110.918	1727.99	94.1128	61.9536	94.7551	66.3534
H1.12.48	12	17 h at 21°C	1	opr3	129.468	115.788	375.6	84.8152	379.287	409.226	508.491	263.303	417.713	173.367	570.708	385.045	199.655	254.324	473.03	227.453	455.514	204.51	265.15	277.163	314.919	241.813	409.927	280.374	492.995	322.898	566.673	333.192	357.898	284.501	357.325	332.496	273.689	260.342	236.09	298.023	306.561	326.147	175.207	212.822	1622.51	203.983	186.738	199.916	215.182
H1.12.52	12	17 h at 21°C	1	opr3	51.0911	31.9056	204.849	15.9979	107.496	183.925	250.247	54.5883	181.061	73.7208	225.16	105.16	38.3325	54.6696	219.101	36.04	119.198	18.2784	53.0349	110.847	53.12	113.638	205.183	60.703	201.536	67.4139	474.686	88.5476	147.548	63.1623	130.281	80.0214	62.5035	59.1977	61.5807	182.542	84.9679	84.1404	33.8749	59.8029	935.92	28.3164	36.6104	46.5674	32.0296
H2.12.05	12	17 h at 21°C	1	opr3	48.1746	38.421	343.766	21.179	159.927	189.806	289.165	74.9447	279.233	74.5364	331.973	222.819	88.5337	158.672	353.241	107.602	379.017	45.3346	142.708	191.109	134.332	112.052	345.705	101.747	292.383	107.158	698.231	155.424	256.132	92.629	200.045	132.536	112	110.726	85.4911	232.227	178.937	154.457	47.5821	80.946	1097.71	60.3472	55.9907	74.3867	63.289
H2.12.35	12	17 h at 21°C	1	opr3	67.0836	43.0146	239.508	22.8352	139.089	209.177	276.461	79.5431	291.56	72.8703	327.924	182.234	74.0176	126.303	351.425	89.5014	300.355	52.7638	98.6839	148.387	96.3422	125.011	279.702	111.824	358.837	105.013	616.215	129.696	261.284	85.3681	194.417	113.698	115.529	100.655	85.8803	203.486	127.12	144.76	59.885	76.533	1212.59	66.1378	49.3001	72.1191	61.8015
H2.12.44	12	17 h at 21°C	1	opr3	53.0394	42.5894	272.904	22.2922	151.386	166.454	277.289	58.8153	294.685	76.2173	340.147	239.163	77.0574	126.354	374.484	89.8809	406.217	69.5369	101.846	173.544	124.446	118.931	304.696	74.5585	363.333	113.953	703.314	152.086	293.178	98.9493	216.024	109.903	87.8833	107.239	92.7191	223.496	129.398	98.0888	48.5764	89.0838	1112.22	63.6478	54.7862	75.3591	69.3302
H3.12.04	12	17 h at 21°C	1	opr3	86.7753	54.3456	196.744	23.1172	149.106	173.123	287.573	94.6399	277.662	95.8446	318.83	273.902	74.2846	131.014	460.329	85.1547	541.412	63.633	94.2841	187.084	111.882	123.189	319.843	91.1707	413.168	98.516	558.054	144.991	296.663	94.3164	192.027	89.6202	102.178	130.484	103.895	358.52	164.13	132.609	44.4772	110.007	1396.41	72.3586	59.6309	78.3821	54.9618
H3.12.38	12	17 h at 21°C	1	opr3	68.0325	51.2412	207.518	25.9704	126.785	159.634	260.906	84.5633	316.863	81.7425	331.851	268.01	67.8726	104.245	373.861	67.1305	505.192	74.7857	87.6876	165.753	108.744	115.269	394.187	125.762	346.175	89.4774	628.846	153.195	339.997	84.2156	188.415	93.1822	122.108	117.797	86.0499	286.415	153.895	192.379	70.8343	106.474	1044.13	59.6214	55.7365	66.7457	55.8575
H3.12.41	12	17 h at 21°C	1	opr3	78.4162	47.3975	196.759	20.5627	121.334	150.942	211.483	81.547	306.067	84.521	320.269	353.714	63.4702	93.8711	394.937	72.9211	706.732	70.2934	96.4577	188.8	93.2999	109.122	497.842	99.6048	360.852	86.2578	654.185	145.539	377.788	83.8812	193.83	79.6847	96.9741	134.993	85.443	369.572	165.774	146.929	54.4516	107.668	1123.17	52.2231	51.9797	60.46	52.8574
H1.13.11	13	12 h at 21°C, 4 h at 45°C, 1 h at 21°C	3	opr3	47.2601	42.1093	351.44	31.9899	206.393	213.138	324.521	84.5599	280.764	97.8632	336.183	246.659	115.881	158.164	378.234	116.457	329.126	41.8015	112.843	178.261	140.989	131.019	336.458	122.935	390.145	144.259	677.47	150.887	227.545	125.302	214.44	128.6	121.87	110.513	100.738	282.267	137.728	170.46	66.1324	93.9149	1029.69	59.974	70.5858	76.4126	75.6929
H1.13.48	13	12 h at 21°C, 4 h at 45°C, 1 h at 21°C	3	opr3	53.2861	62.483	748.687	44.1055	293.658	251.022	434.266	153.468	331.027	141.63	376.258	256.789	157.03	218.017	398.179	201.772	314.98	78.995	128.185	169.226	180.352	193.07	369.666	159.438	478.608	204.733	575.939	256.528	234.496	172.301	210.33	165.348	163.281	136.705	118.741	301.411	144.297	197.188	105.158	146.978	1228.93	96.2556	99.3609	119.597	126.245
H1.13.52	13	12 h at 21°C, 4 h at 45°C, 1 h at 21°C	3	opr3	53.3939	59.7069	359.296	39.905	202.382	201.773	326.205	133.395	276.417	115.868	316.821	262.298	137.741	196.88	431.826	137.645	263.954	43.0941	129.136	201.499	158.63	137.21	372.158	87.35	415.057	150.929	610.318	178.832	252.111	136.404	187.878	133.313	124.235	117.359	105.353	302.827	126.989	150.91	71.173	115.667	1453.58	65.954	63.2543	133.428	85.5871
H2.13.05	13	12 h at 21°C, 4 h at 45°C, 1 h at 21°C	3	opr3	64.6691	43.4142	310.765	26.5419	206.127	233.652	331.819	109.422	344.242	112.068	361.942	228.803	109.149	216.918	501.59	125.209	385.703	52.294	156.728	200.056	170.813	166.188	366.735	209.641	348.871	124.083	628.799	168.897	268.166	106.935	242.598	126.811	157.305	110.858	107.752	318.357	157.579	209.481	62.6495	108.363	1249.11	64.3982	65.8337	81.4447	63.8762
H2.13.35	13	12 h at 21°C, 4 h at 45°C, 1 h at 21°C	3	opr3	48.9422	38.722	371.316	21.3376	173.809	198.772	299.001	85.4133	287.762	92.6602	351.152	266.588	105.02	204.53	516.664	126.407	476.197	46.1149	105.396	163.655	113.597	144.016	416.518	113.568	334.979	97.6921	703.875	155.345	254.005	103.178	209.348	129.893	102.095	126.342	81.8953	265.428	145.416	116.353	46.2714	76.0228	1171.55	55.4211	51.8501	77.1867	57.2989
H2.13.44	13	12 h at 21°C, 4 h at 45°C, 1 h at 21°C	3	opr3	58.9271	47.1841	482.312	30.9841	245.439	293.817	318.936	100.728	347.191	127.16	416.688	278.064	131.452	272.72	566.364	218.659	499.934	78.7735	169.105	201.344	160.468	187.546	485.278	143.381	398.58	137.248	681.979	240.292	243.484	142.577	308.85	177.984	123.593	150.405	113.09	308.161	197.297	153.08	72.2645	82.8665	1548.79	67.3241	72.467	102.242	72.9962
H3.13.04	13	12 h at 21°C, 4 h at 45°C, 1 h at 21°C	3	opr3	36.0599	31.7346	164.414	18.5082	104.952	111.98	206.136	65.4111	254.966	95.479	245.873	280.631	81.7307	199.44	501.442	121.137	537.102	40.9331	74.9016	150.592	97.2487	118.468	505.82	100.357	334.129	76.8256	595.901	146.7	294.61	77.5018	196.448	63.3519	91.1153	153.753	77.5599	552.249	106.348	135.172	46.8978	59.8673	543.44	42.4473	43.9927	53.9126	47.6575
H3.13.38	13	12 h at 21°C, 4 h at 45°C, 1 h at 21°C	3	opr3	39.3017	32.9101	212.533	22.1603	118.829	123.871	301.562	71.8902	287.455	94.7751	254.862	287.86	73.0092	166.485	487.198	110.535	627.176	49.5053	100.213	146.208	92.8197	135.713	523.708	93.3511	299.003	74.7191	646.024	152.37	317.243	82.1688	203.656	71.4825	91.6353	164.582	75.4943	445.062	120.079	114.198	46.7472	63.2392	673.924	54.7828	47.1458	55.9277	49.2406
H3.13.41	13	12 h at 21°C, 4 h at 45°C, 1 h at 21°C	3	opr3	65.5928	40.9162	221.511	22.3438	141.148	136.246	277.342	65.789	283.891	102.066	266.437	292.443	66.5026	158.362	637.302	95.7435	639.526	61.4544	91.3266	160.868	104.261	127.256	469.845	85.4817	369.009	86.1881	675.448	147.763	347.242	91.146	198.599	67.6728	96.4905	162.774	82.9927	440.909	132.727	115.937	53.6217	66.0793	771.682	56.1438	54.2301	62.8989	55.0878
H1.14.11	14	12 h at 38°C, 4 h at 45°C, 1 h at 21°C	2	opr3	36.8316	28.7227	227.022	15.3397	136.51	139.977	222.395	62.1727	302.891	174.516	239.368	286.597	84.6629	174.445	537.237	106.644	321.045	43.8577	79.8471	151.507	113.492	158.152	608.895	95.9744	366.714	102.211	579.397	157.51	234.192	92.429	175.837	105.344	90.9443	201.01	73.3016	596.541	120.502	127.353	53.9209	108.132	1190.62	66.9398	45.4693	63.2684	70.9865
H1.14.48	14	12 h at 38°C, 4 h at 45°C, 1 h at 21°C	2	opr3	48.5262	28.4397	158.513	19.7222	125.396	122.353	202.508	47.3114	282.721	179.521	226.909	235.491	37.4647	126.549	648.53	71.011	267.942	25.8933	75.9456	83.2329	130.464	200.38	884.208	80.4146	420.414	73.2224	650.602	128.083	196.181	92.5125	146.966	49.9349	69.7214	182.55	75.3854	1133.16	99.9167	79.0823	43.5452	89.3549	1397.88	46.6194	40.9342	56.4809	41.5253
H1.14.52	14	12 h at 38°C, 4 h at 45°C, 1 h at 21°C	2	opr3	40.2375	27.3765	150.694	14.6879	112.23	127.988	218.334	46.7535	252.413	165.293	199.566	157.85	32.3373	121.043	589.482	45.8814	192.592	35.1787	58.2395	110.682	140.139	147.102	730.678	64.8588	342.295	61.8383	614.648	96.8636	174.844	66.3357	136.785	67.0367	82.2869	143.353	71.3167	990.486	72.1448	115.579	42.3872	81.6407	1157.91	43.1602	30.5032	39.9894	32.9545
H2.14.05	14	12 h at 38°C, 4 h at 45°C, 1 h at 21°C	2	opr3	43.6803	32.2178	245.339	22.3208	181.349	191.178	252.663	86.9354	267.847	180.592	295.892	178.986	91.5592	189.634	463.087	110.955	247.49	58.0109	128.665	153.606	158.353	159.382	403.236	67.5198	301.248	133.205	331.111	160.027	164.872	91.7458	180.049	113.554	87.2879	129.429	85.1916	466.315	121.919	99.1288	46.0066	77.2484	1031.32	55.7634	54.4879	70.7416	55.3045
H2.14.35	14	12 h at 38°C, 4 h at 45°C, 1 h at 21°C	2	opr3	38.3644	30.2436	317.445	26.7582	158.651	159.558	297.705	70.3371	242	143.237	292.459	211.404	85.6905	143.201	420.826	97.3726	275.363	46.2477	117.015	157.424	126.227	139.959	317.006	126.82	287.677	112.319	434.066	141.846	227.3	83.6875	161.664	112.975	111.496	115.582	77.3326	397.57	123.153	155.79	47.3419	78.2373	850.71	57.2959	52.7933	65.3224	64.793
H2.14.44	14	12 h at 38°C, 4 h at 45°C, 1 h at 21°C	2	opr3	20.9254	18.9331	161.479	13.5956	107.057	94.4671	203.377	49.8625	154.707	89.8684	171.642	123.533	47.5214	91.093	284.161	45.4697	185.4	41.6278	64.8099	89.275	88.9254	74.7132	228.487	48.3932	209.722	72.5469	264.991	98.9284	137.293	57.384	113.239	60.6989	48.649	74.0035	46.0394	319.609	64.8523	77.0551	43.8379	44.2031	477.234	39.4701	35.5187	42.5371	38.0058
H3.14.04	14	12 h at 38°C, 4 h at 45°C, 1 h at 21°C	2	opr3	47.8416	40.7867	426.466	33.7735	223.183	177.623	588.548	125.336	344.756	275.184	361.99	428.389	135.798	387.786	796.739	256.68	641.421	78.6201	176.168	241.003	161.609	220.699	642.199	123.385	433.274	119.502	813.28	314.043	348.088	156.065	417.007	98.7348	147.168	186.257	103.801	957.182	135.468	134.204	69.9545	123.184	863.116	97.9085	64.1983	83.2784	100.348
H3.14.38	14	12 h at 38°C, 4 h at 45°C, 1 h at 21°C	2	opr3	56.4185	45.305	350.446	29.917	163.453	165.123	248.627	83.9182	331.74	213.106	345.159	429.37	112.568	266.381	737.212	185.932	758.514	78.963	104.65	157.571	156.089	205.942	724.591	135.459	404.154	111.434	1007.03	202.454	413.6	124.541	249.608	109.684	129.11	245.527	108.96	1025.08	170.078	167.722	87.7612	86.5231	904.222	80.1823	62.337	74.5137	75.5438
H3.14.41	14	12 h at 38°C, 4 h at 45°C, 1 h at 21°C	2	opr3	43.4079	38.6538	416.219	25.4431	132.633	131.265	296.781	75.7879	263.737	174.056	256.033	243.369	70.7822	158.266	495.546	113.941	479.758	60.4071	118.898	174.793	109.97	155.536	526.868	97.6789	290.938	94.2604	740.252	139.388	310.098	100.094	162.067	55.8637	97.0093	152.047	78.7405	583.069	113.211	100.854	60.2022	67.7085	566.309	57.0664	49.9323	61.9573	57.0637
H1.15.11	15	40 h at 21°C	1	opr3	42.5727	27.169	141.351	16.5081	74.9422	113.882	167.649	39.7726	157.836	89.4936	157.795	76.0779	35.8612	43.9293	212.907	27.9998	151.58	30.8384	67.3583	95.4922	52.9205	88.7527	196.892	48.6853	130.419	57.4652	308.948	74.8171	157.59	57.7826	105.716	66.315	46.8415	83.222	51.2946	153.035	48.8774	48.8846	30.189	58.3958	760.167	26.9801	25.8977	37.2917	25.472
H1.15.48	15	40 h at 21°C	1	opr3	53.0515	31.5605	309.603	16.6817	104.706	176.374	270.685	53.4265	220.584	54.1824	259.115	140.103	49.9089	93.675	318.069	47.98	230.134	32.1037	79.8214	120.586	68.6843	87.1974	272.468	45.6527	210.04	72.7892	801.055	113.55	186.95	66.341	200.407	52.0469	62.6081	62.6703	48.57	189.063	107.404	62.6666	45.7598	54.1742	1067.39	37.6005	33.3828	54.3413	38.6299
H1.15.52	15	40 h at 21°C	1	opr3	40.5057	22.1554	173.207	12.8593	77.9619	176.509	195.933	41.7972	153.252	81.6391	159.419	81.3858	27.9246	61.851	142.615	27.109	111.878	27.5897	48.3857	74.4676	50.7874	87.3054	188.639	29.8074	152.997	43.3139	528.367	62.9856	116.898	46.7216	100.192	46.6678	37.9009	47.0505	41.5414	159.369	78.7405	46.0239	22.6605	38.6965	652.119	24.9432	24.7028	32.3346	27.2129
H2.15.05	15	40 h at 21°C	1	opr3	36.3546	26.4049	170.51	16.1385	95.496	115.923	209.003	54.7562	188.582	54.8197	192.048	104.732	52.6548	72.224	239.418	43.3241	178.422	31.4767	64.3328	98.6245	56.2365	77.9029	177.119	43.2359	176.774	58.9283	270.499	105.258	150.342	54.3385	155.876	56.998	60.7164	62.2423	58.0442	130.275	82.2953	74.8261	29.2794	43.5491	670.104	36.4238	32.8597	44.067	32.4121
H2.15.35	15	40 h at 21°C	1	opr3	42.7874	27.9435	198.236	15.6384	106.806	120.207	212.315	53.3668	209.729	57.3176	198.015	148.005	56.2205	80.5383	249.99	60.4424	201.753	25.5777	76.0219	130.923	80.4981	76.2307	207.366	78.586	183.096	71.199	310.633	112.538	169.63	55.8599	145.77	75.4499	76.362	62.8975	64.2179	144.644	97.5244	94.742	38.7341	55.5202	879.959	42.0316	35.8817	48.9653	40.8749
H2.15.44	15	40 h at 21°C	1	opr3	34.7003	30.0893	212.607	15.5375	110.007	121.719	224.768	63.9963	206.688	57.9781	209.556	148.097	70.7609	90.9177	250.386	62.4196	281.311	44.6628	75.8767	124.674	97.3522	77.0969	265.986	77.1213	223.19	76.1123	315.809	127.418	204.453	64.2812	167.323	79.794	81.6117	79.7696	66.0029	137.8	110.577	108.857	39.2585	52.4836	751.137	41.4521	36.8741	52.1228	42.7204
H3.15.04	15	40 h at 21°C	1	opr3	42.2266	35.484	227.877	14.582	67.7627	72.7864	168.049	28.7217	193.178	44.5608	190.945	276.36	41.7196	100.969	445.444	59.7918	628.355	32.5979	63.3889	126.128	74.3529	81.1946	248.383	63.766	276.611	69.1	531.778	130.622	285.258	73.7563	178.802	52.2822	77.9678	180.006	66.4644	203.162	119.918	84.6858	43.6019	40.5256	614.728	39.3516	37.6038	48.1708	43.254
H3.15.38	15	40 h at 21°C	1	opr3	NA	NA	NA	NA	NA	NA	NA	NA	NA	NA	NA	NA	NA	NA	NA	NA	NA	NA	NA	NA	NA	NA	NA	NA	NA	NA	NA	NA	NA	NA	NA	NA	NA	NA	NA	NA	NA	NA	NA	NA	NA	NA	NA	NA	NA
H3.15.41	15	40 h at 21°C	1	opr3	36.8464	29.2599	221.011	11.4994	70.7182	79.2733	141.267	35.0632	236.735	40.1932	205.81	214.639	50.7283	109.645	355.899	68.393	445.453	42.4085	67.8787	127.393	69.1937	66.7325	307.321	75.235	219.903	60.6324	515.855	111.32	277.303	55.9136	139.387	58.9177	77.7273	112.399	55.9215	181.012	99.7448	86.2656	27.7145	34.9357	533.34	35.5303	37.8361	42.4807	35.3722
H1.16.11	16	12 h at 21°C, 4 h at 45°C, 24 h at 21°C	3	opr3	41.74	33.5774	276.148	25.1909	109.316	224.944	287.824	89.8574	191.106	119.212	228.109	118.831	52.7861	64.2147	255.74	62.6816	171.418	60.1618	83.8761	103.484	77.6653	114.241	240.097	60.5831	213.991	87.4324	473.879	108.986	168.816	68.7703	149.035	54.4484	76.9152	62.3842	61.5487	192.489	87.1704	73.6827	34.046	61.6417	947.038	44.8619	41.7011	49.0764	39.603
H1.16.48	16	12 h at 21°C, 4 h at 45°C, 24 h at 21°C	3	opr3	NA	NA	NA	NA	NA	NA	NA	NA	NA	NA	NA	NA	NA	NA	NA	NA	NA	NA	NA	NA	NA	NA	NA	NA	NA	NA	NA	NA	NA	NA	NA	NA	NA	NA	NA	NA	NA	NA	NA	NA	NA	NA	NA	NA	NA
H1.16.52	16	12 h at 21°C, 4 h at 45°C, 24 h at 21°C	3	opr3	38.1496	28.9332	192.348	17.168	102.406	221.91	217.89	48.7085	178.833	113.953	214.247	88.5289	38.2429	66.3856	305.852	36.9647	145.598	33.6835	69.0824	85.7052	65.1218	119.186	247.036	45.2364	224.409	63.3219	530.34	97.2564	137.633	56.2642	123.644	61.9788	59.3889	61.0486	47.9444	243.178	60.811	72.8667	25.5005	67.7715	986.589	42.9347	29.4877	45.222	30.3307
H2.16.05	16	12 h at 21°C, 4 h at 45°C, 24 h at 21°C	3	opr3	32.8659	26.3221	205.552	14.3118	85.9811	98.3574	175.236	35.2611	167.232	45.4951	178.543	116.987	42.1241	62.4922	238.137	46.6693	176.615	28.8114	56.0492	116.542	59.4263	62.6055	180.72	43.6975	192.602	56.1037	331.802	64.3014	171.545	41.6239	91.2007	39.9258	60.0697	62.1053	49.3576	134.424	80.0083	71.8294	28.7702	47.8722	458.874	33.398	34.0866	39.9603	29.7843
H2.16.35	16	12 h at 21°C, 4 h at 45°C, 24 h at 21°C	3	opr3	39.1876	31.808	286.481	15.6086	104.718	111.244	224.899	40.5835	226.482	53.8394	261.77	177.826	54.4345	93.4946	322.562	65.6126	257.118	45.5393	68.1242	146.761	84.3927	83.3086	245.992	64.1735	238.585	80.88	503.223	98.9345	239.97	58.6419	127.263	54.7922	68.2271	74.1804	60.3156	166.899	107.645	82.4348	39.8532	49.1113	601.511	36.9931	44.9199	52.4413	43.5562
H2.16.44	16	12 h at 21°C, 4 h at 45°C, 24 h at 21°C	3	opr3	30.2761	23.0898	226.896	12.2983	88.0588	92.6398	189.88	36.4467	169.778	42.9169	190.639	125.258	40.1435	76.0404	223.208	50.6685	234.843	41.4305	50.3588	131.244	63.0203	58.7215	199.943	56.0974	193.007	70.0907	447.374	63.1785	177.79	45.8993	91.5648	41.3851	57.4227	61.4685	48.8485	128.1	86.9937	70.5873	31.5304	47.1577	460.156	27.3253	32.2908	41.0916	30.5144
H3.16.04	16	12 h at 21°C, 4 h at 45°C, 24 h at 21°C	3	opr3	33.7019	30.9958	216.453	19.9302	111.836	112.712	162.141	66.1158	207.137	77.6617	205.933	218.251	78.6512	161.35	535.837	116.649	579.111	48.1087	71.5128	116.289	77.4937	87.0519	360.626	93.7844	272.512	72.5376	478.788	140.988	270.958	76.0092	246.245	62.4531	87.3281	162.43	68.462	345.619	102.86	92.2301	34.1015	77.9106	610.502	38.3905	43.4082	46.1962	39.814
H3.16.38	16	12 h at 21°C, 4 h at 45°C, 24 h at 21°C	3	opr3	33.5522	32.1237	216.99	15.1284	86.4286	102.376	130.819	41.7388	177.174	82.0544	184.457	143.883	47.4305	93.5831	488.579	79.9197	420.406	36.1712	81.1317	119.055	80.2682	72.4895	282.048	59.0776	293.167	50.7833	477.901	103.607	251.995	61.7446	159.615	56.5592	65.013	117.582	51.5557	260.684	100.798	74.1149	32.2202	72.4191	742.064	41.266	34.1319	42.2895	40.54
H3.16.41	16	12 h at 21°C, 4 h at 45°C, 24 h at 21°C	3	opr3	48.5088	40.1714	551.64	24.1263	130.407	118.048	365.059	76.8768	231.083	99.7455	221.821	231.865	65.65	109.796	662.589	81.7959	404.985	60.546	107.124	153.387	80.7239	91.5199	321.324	72.8461	302.452	79.8416	555.594	120.445	246.285	81.1491	215.2	70.8423	97.0788	111.294	68.5499	323.911	111.711	124.03	41.1291	78.8553	885.551	54.7043	50.7946	53.8066	46.1746
H1.17.11	17	12 h at 38°C, 4 h at 45°C, 24 h at 21°C	2	opr3	54.7195	38.5985	201.246	16.285	111.188	147.321	301.282	67.7223	216.982	141.282	215.174	109.649	41.4318	125.103	435.817	44.6833	132.638	37.8144	65.9523	99.3843	89.0526	97.1882	369.437	66.6076	245.929	50.7738	470.468	98.4669	197.496	78.9991	153.084	57.1893	66.1917	88.8162	63.0917	399.862	72.3748	78.6133	39.7392	86.1245	1279.81	48.0895	30.4722	54.8693	30.3383
H1.17.48	17	12 h at 38°C, 4 h at 45°C, 24 h at 21°C	2	opr3	58.352	42.0907	256.061	20.1284	118.413	156.713	272.999	60.4431	222.192	154.207	239.688	136.448	71.8175	91.2298	470.801	60.3596	222.141	34.2871	75.9873	145.98	98.1824	94.3114	363.289	101.717	262.215	72.3992	520.187	107.454	231.461	76.0801	179.537	77.2825	78.5821	107.302	72.0727	362.629	117.452	105.312	33.3851	94.2234	1141.53	44.749	45.2262	57.2567	34.3263
H1.17.52	17	12 h at 38°C, 4 h at 45°C, 24 h at 21°C	2	opr3	60.6648	40.6521	300.335	34.4046	144.806	189.656	484.702	100.921	219.875	150.159	244.219	151.103	65.2068	115.402	380.259	64.6005	199.587	56.5662	117.944	129.759	74.4563	104.694	291.718	97.6947	280.848	84.2964	425.472	121.105	236.027	95.7551	189.577	70.06	93.9193	79.6877	81.7322	287.256	118.007	95.0314	53.5325	98.2575	1125.26	73.5933	48.6659	60.2819	45.0327
H2.17.05	17	12 h at 38°C, 4 h at 45°C, 24 h at 21°C	2	opr3	39.3776	32.8855	263.779	15.9358	127.014	130.389	295.235	45.6418	226.934	94.2262	246.286	190.216	62.9685	119.81	323.506	70.543	300.333	37.5305	78.9423	151.873	91.6809	88.0119	241.044	57.8175	315.985	92.2852	396.565	103.499	218.749	72.2328	127.565	67.597	78.6898	84.4465	67.8989	199.234	97.1212	92.8096	40.1877	52.908	567.748	40.7295	46.8292	60.7226	47.488
H2.17.35	17	12 h at 38°C, 4 h at 45°C, 24 h at 21°C	2	opr3	36.2047	31.1642	239.623	17.0845	102.945	116.852	276.292	37.5091	176.867	90.706	243.011	154.165	53.5186	93.4965	273.844	66.4509	204.442	44.7394	65.4661	97.9946	80.7217	83.2361	172.732	51.6497	266.534	80.12	531.442	87.0552	199.317	64.4144	99.208	46.4781	64.3463	66.4096	63.5504	180.159	97.5146	77.4779	36.9339	59.7707	567.124	39.1036	39.2087	54.3915	51.378
H2.17.44	17	12 h at 38°C, 4 h at 45°C, 24 h at 21°C	2	opr3	40.0548	37.7082	434.227	21.2414	113.129	140.55	264.228	53.0502	182.279	81.7124	248.122	163.412	71.6527	127.829	304.071	72.2313	251.355	44.5071	72.773	115.831	81.4469	94.6554	200.183	40.9868	318.794	87.7805	552.618	100.056	214.098	65.3999	112.275	69.7173	71.3545	82.8734	64.0111	201.575	104.389	78.5666	36.6219	60.1001	636.547	41.5037	46.9174	59.1188	48.4926
H3.17.04	17	12 h at 38°C, 4 h at 45°C, 24 h at 21°C	2	opr3	28.6593	29.6256	209.324	16.6729	125.031	131.074	177.195	54.8919	203.406	134.955	213.889	186.785	78.0176	119.366	470.417	109.418	372.016	37.724	75.378	133.176	95.4731	89.4743	281.672	62.9221	266.944	82.3201	432.252	115.484	222.792	79.6062	224.991	59.6681	78.6328	105.307	57.2667	317.501	91.4099	86.8293	42.0271	48.7124	500.705	39.9136	42.7956	44.7393	44.5681
H3.17.38	17	12 h at 38°C, 4 h at 45°C, 24 h at 21°C	2	opr3	26.0326	28.0926	185.058	19.0146	108.607	119.83	191.789	56.9007	184.053	113.286	184.919	151.569	67.6154	124.305	389.66	80.8283	304.942	45.8354	71.3868	120.479	75.3934	84.5998	268.262	86.7799	225.043	79.4807	344.444	100.567	206.276	72.448	179.817	85.6451	110.11	112.031	56.4295	283.743	105.034	113.986	39.4368	53.7628	496.084	40.7314	39.7008	48.4211	47.7491
H3.17.41	17	12 h at 38°C, 4 h at 45°C, 24 h at 21°C	2	opr3	50.0791	44.3165	334.821	24.4569	173.134	223.063	278.401	75.9875	282.79	158.392	250.396	227.764	93.3964	192.233	636.663	155.065	365.571	58.9007	151.413	192.481	123.574	130.841	417.376	104.87	417.963	114.47	500.209	126.681	243.66	107.615	204.361	107.338	116.847	125.67	88.0546	578.71	124.276	155.927	57.7462	91.1934	906.849	58.0351	67.1853	71.2892	54.798
Average values for WT by treatment
Average	1	0 time, 4-wk-old plants, 21°C		WT	70.598	43.9548	436.606	24.6392	152.828	179.984	317.86	75.695	313.284	76.3459	351.622	241.47	85.0504	140.986	442.702	87.1033	505.034	67.0223	125.272	190.623	118.105	107.936	358.052	121.97	343.147	106.227	744.725	139.155	353.067	92.9321	229.164	120.788	116.446	131.745	95.5859	214.878	163.949	151.702	50.6308	106.763	1450.64	68.1825	55.3179	72.1654	61.7523
Average	2	1 h at 21°C		WT	70.4207	41.6894	392.35	25.9858	138.88	167.625	355.528	82.9374	273.312	83.5586	317.846	180.729	72.4123	125.473	398.88	76.0282	378.952	62.9205	121.042	160.57	110.501	112.011	311.951	104.48	308.124	92.2172	686.42	135.712	306.926	88.838	200.967	102.124	113.396	116.035	83.1126	214.392	145.838	148.886	53.6217	89.637	1315.59	57.7152	48.9264	68.749	57.3054
Average	3	1 h at 38°C		WT	54.2316	36.1212	348.399	19.998	151.057	154.221	334.987	71.8248	272.026	78.0409	301.063	193.429	72.5313	132.311	441.652	79.8753	378.749	56.1447	110.238	157.697	107.131	115.216	291.631	89.2644	274.715	95.6908	705.395	136.263	284.857	97.2023	190.752	102.851	102.489	116.58	82.5415	208.665	138.028	128.933	46.0738	74.7546	1012.24	54.823	49.9353	66.4911	52.5018
Average	4	12 h at 21°C		WT	101.724	56.9733	530.952	32.4165	213.485	241.479	355.892	111.857	378.099	134.212	467.494	278.713	101.247	164.935	386.034	110.561	578.455	82.6521	158.016	227.784	171.363	145.616	413.135	108.634	436.476	142.055	681.829	199.02	392.141	135.805	277.978	171.275	136.083	181.16	121.077	302.274	207.579	185.611	72.0433	131.55	1671.07	92.4593	75.996	98.2213	77.2291
Average	5	12 h at 38°C		WT	61.2326	38.988	350.292	24.6781	152.313	162.185	279.02	75.9962	270.559	215.491	320.108	220.759	72.3497	138.709	406.337	81.7021	388.619	54.6594	101.358	150.027	116.303	148.6	360.724	81.1892	312.55	97.1871	621.427	158.32	291.879	103.156	174.717	106.951	98.5927	137.323	85.4491	422.952	146.008	117.384	54.0003	75.2364	964.402	59.1837	54.5099	67.3143	60.6739
Average	6	13 h at 21°C		WT	57.417	36.0622	311.855	22.8267	128.407	152.305	338.893	82.4005	244.167	115.231	294.174	188.144	63.1291	105.879	311.931	68.1745	457.232	55.2848	104.512	160.769	101.951	105.575	309.069	70.0746	246.272	88.5899	677.045	131.249	308.22	83.0817	203.889	98.2127	85.4488	141.888	78.4076	209.154	141.972	95.3673	51.1747	64.8033	891.45	52.2998	49.1042	61.7669	52.0624
Average	7	12 h at 21°C, 1 h at 45°C		WT	63.7556	38.6057	370.027	25.3544	140.574	172.46	327.996	80.6898	302.512	110.003	344.159	242.202	81.3475	143.405	409.388	91.5593	508.776	64.0809	103.161	188.35	117.509	129.396	404.552	93.029	287.189	92.1817	817.996	165.611	326.957	99.9044	233.789	112.764	106.981	143.291	88.139	310.642	145.441	129.457	52.4951	77.4096	1145.57	55.3766	52.5848	73.5266	54.767
Average	8	12 h at 38°C, 1 h at 45°C		WT	59.0283	36.918	306.592	26.4596	145.824	162.624	284.439	86.6028	318.02	202.55	303.786	234.315	72.7887	151.819	567.958	89.2403	493.939	48.7406	106.182	172.778	128.829	149.92	579.708	96.9052	333.925	98.4742	761.883	166.797	276.827	93.8531	217.361	97.3535	104.771	177.693	92.9097	667.886	153.437	140.147	57.0925	79.789	972.335	59.3509	53.2855	66.4209	58.4277
Average	9	16 h at 21°C		WT	58.9019	35.8671	260.278	19.1649	104.736	131.752	216.099	57.6933	223.178	84.4997	250.493	150.255	48.1841	76.9024	304.941	48.2872	382.041	45.4127	79.9943	140.289	84.7792	94.1966	295.953	81.6841	235.678	67.3387	510.913	116.182	277.125	64.3815	175.221	79.203	87.4129	126.375	73.8987	224.9	123.239	118.137	39.0265	69.8538	862.38	44.6579	41.4746	54.2146	40.015
Average	10	12 h at 21°C, 4 h at 45°C		WT	66.0233	42.9396	363.758	26.8967	186.787	182.343	343.759	88.7319	352.625	126.222	348.092	297.249	106.83	234.32	649.608	141.207	481.22	65.9425	125.859	186.992	144.396	155.662	477.051	111.544	370.614	110.66	710.263	223.769	327.798	107.582	256.008	110.638	120.32	142.212	97.3984	474.604	153.028	145.842	61.234	96.058	1213.29	72.5887	60.0559	79.4995	72.0096
Average	11	12 h at 38°C, 4 h at 45°C		WT	57.304	34.2518	264.05	27.9579	275.677	165.088	547.822	100.802	322.956	431.314	355.227	296.335	78.7567	192.717	659.803	107.061	508.693	57.2885	136.336	184.909	212.349	183.846	741.897	95.3025	388.386	90.6693	763.049	929.267	445.997	101.903	610.006	88.465	104.548	163.082	90.6698	874.803	126.594	122.931	59.1735	86.1403	1040.62	67.3235	51.9213	62.331	60.7963
Average	12	17 h at 21°C		WT	77.3806	44.9472	336.603	23.1242	148.151	181.315	282.851	78.7597	306.587	84.6569	340.138	223.783	77.815	113.205	418.034	76.9173	387.234	59.4452	103.151	213.02	117.126	110.067	335.713	104.704	329.296	102.542	658.264	141.659	295.595	86.5681	203.051	108.884	108.419	113.131	88.839	271.34	151.838	140.553	58.1928	98.8237	1312.68	62.542	56.3056	69.3063	61.7944
Average	13	12 h at 21°C, 4 h at 45°C, 1 h at 21°C		WT	62.0945	44.9517	379.207	27.9093	178.587	191.51	331.581	85.6054	314.641	115.284	336.965	243.899	92.3538	167.858	575.57	107.728	476.723	65.7904	120.44	176.752	135.443	131.114	432.678	116.38	379.868	122.117	676.408	167.378	300.754	102.687	231.136	118.108	121.082	150.252	96.926	370.526	157.354	151.356	63.7657	89.8679	1185.61	65.1091	60.656	81.6395	66.7882
Average	14	12 h at 38°C, 4 h at 45°C, 1 h at 21°C		WT	47.9676	34.8539	264.563	25.7632	151.753	148.786	328.691	79.5931	278.369	175.598	285.82	219.36	69.4113	133.484	526.654	81.4555	468.956	50.9935	103.46	150.739	125.781	144.773	468.912	97.0405	322.648	96.6601	606.717	155.173	294.301	95.6895	198.296	94.5049	102.902	171.536	82.9753	563.312	154.32	131.511	54.6354	74.9817	879.041	57.5797	56.5226	64.0587	58.7206
Average	15	40 h at 21°C		WT	42.8053	29.0084	276.461	16.0728	92.6525	105.657	196.243	47.9359	200.219	66.3927	202.133	133.33	46.4937	82.8729	299.408	50.5519	352.943	35.3897	75.8724	125.303	74.943	81.4447	247.223	69.34	203.893	64.6243	421.372	111.9	230.542	61.1302	160.846	70.8986	77.5073	111.345	61.7204	167.699	105.896	96.5762	34.9153	47.0028	686.278	37.3787	36.7477	48.2184	39.1235
Average	16	12 h at 21°C, 4 h at 45°C, 24 h at 21°C		WT	47.5853	35.2588	307.038	22.3508	125.668	155.592	364.668	73.8645	241.823	102.238	248.207	196.055	58.1377	98.9938	467.504	67.2651	390.099	44.7033	92.0533	165.467	90.0518	87.9435	302.046	72.987	272.009	76.14	613.982	154.006	259.572	76.0657	227.653	70.9661	86.1094	117.798	64.8847	269.273	116.778	93.7701	46.8938	69.5569	802.483	51.0709	45.6475	53.3386	43.6435
Average	17	12 h at 38°C, 4 h at 45°C, 24 h at 21°C		WT	56.9154	37.5235	334.538	25.3999	128.933	148.608	388.985	78.6612	252.585	132.502	257.896	170.017	66.1886	107.595	424.812	71.4961	299.885	46.3593	98.2734	165.468	86.9756	92.8728	298.9	77.2328	287.369	86.7399	535.073	116.731	252.035	77.2167	192.555	74.2823	85.6823	95.9092	73.3507	290.804	115.876	97.3854	45.8305	74.6017	869.568	57.6697	45.8811	57.8233	49.3751
Average values for opr3 by treatment
Average	1	0 time, 4-wk-old plants, 21°C		opr3	59.4368	44.2335	455.067	26.0252	155.378	181.573	305.7	88.8242	291.276	72.3309	325.22	258.878	88.9816	145.393	368.226	95.0475	422.688	65.3426	123.482	190.489	120.71	112.94	325.314	126.674	329.029	110.601	699.598	138.719	302.411	93.9492	212.072	112.816	125.429	110.3	92.5951	201.214	142.006	165.34	50.3613	109.496	1361.75	69.9452	52.0701	73.9474	60.6087
Average	2	1 h at 21°C		opr3	57.614	44.6929	404.594	25.0818	153.473	174.915	320.969	88.0949	280.987	75.2687	324.15	220.538	87.7918	150.808	376.213	96.1322	381.605	73.5348	118.048	174.28	120.551	115.648	311.066	114.663	338.376	106.298	646.413	143.836	292.988	95.0422	198.709	119.47	117.437	106.86	85.2563	200.337	142.076	145.805	53.5077	88.762	1219.11	62.7898	51.7131	73.4024	63.9868
Average	3	1 h at 38°C		opr3	46.3045	36.3512	408.237	21.2013	154.626	159.914	300.921	74.5787	250.37	69.1654	283.644	186.158	83.9465	146.028	346.045	87.6186	301.4	62.6158	103.168	143.732	107.028	117.191	251.675	84.5276	252.255	102.745	595.906	138.348	231.387	94.7089	161.148	109.701	100.633	88.6376	81.4333	183.502	123.458	130.168	44.4717	70.6152	868.467	52.6358	46.6868	68.5846	53.0895
Average	4	12 h at 21°C		opr3	72.17	49.0314	392.617	28.2935	185.594	204.326	330.001	93.0728	310.283	108.377	370.052	258.831	89.4493	145.88	332.44	94.3084	509.817	65.682	134.534	181.498	138.254	136.334	320.39	93.8568	378.891	130.608	604.939	176.301	313.656	112.998	218.856	130.379	120.308	146.198	110.109	259.837	162.606	148.634	66.7853	111.717	1453.16	74.9509	59.7189	84.182	64.6633
Average	5	12 h at 38°C		opr3	54.0192	40.2221	259.972	25.6658	156.21	174.883	310.335	74.5715	291.633	203.011	317.467	267.64	81.5265	174.623	398.743	98.2339	401.086	58.3594	110.014	157.338	136.263	162.116	414.932	92.5516	308.152	102.206	652.618	178.119	268.684	113.65	191.56	106.765	111.526	142.973	93.869	519.309	142.607	139.16	61.2834	84.5937	982.178	59.9878	55.0715	73.0398	70.6707
Average	6	13 h at 21°C		opr3	41.9799	30.716	272.019	17.6927	114.426	138.57	243.986	67.297	217.365	108.194	262.943	173.36	56.4909	112.58	246.422	66.1966	402.224	49.7104	83.7941	127.101	96.1134	103.07	288.861	71.3388	229.307	82.4766	549.286	129.196	259.85	78.9293	180.055	82.1483	85.7492	130.468	73.2423	172.061	125.515	100.293	45.6234	53.6319	726.389	43.6279	44.4107	57.6888	46.3397
Average	7	12 h at 21°C, 1 h at 45°C		opr3	54.9806	36.796	278.66	21.7202	135.384	157.748	273.797	77.8777	261.359	91.8564	285.405	239.435	84.4117	151.378	339.294	98.6391	392.358	52.8855	93.175	148.005	110.667	134.829	342.882	78.9783	272.39	95.0628	669.07	157.974	272.064	97.5116	196.317	100.043	91.9205	116.117	81.1521	258.942	123.341	111.35	44.1602	72.9915	993.627	49.4053	46.8391	70.0873	51.901
Average	8	12 h at 38°C, 1 h at 45°C		opr3	51.1603	39.312	315.168	26.376	158.734	174.631	252.256	89.8006	349.194	185.879	307.278	289.445	92.6852	200.204	573.565	127.797	453.716	58.533	121.046	182.123	155.052	169.923	635.078	114.842	358.392	113.774	764.279	192.184	258.707	110.456	221.074	102.386	121.732	181.118	97.468	772.304	162.112	155.25	70.261	83.0394	849.429	66.6087	59.7753	70.2156	62.7492
Average	9	16 h at 21°C		opr3	47.7881	32.7296	213.243	16.8835	99.5781	132.028	193.864	48.6066	207.362	70.1921	217.094	165.826	47.7351	80.7052	290.672	51.6077	337.948	39.566	73.7642	128.793	79.678	85.2199	274.433	66.9062	221.943	69.3648	498.233	119.019	230.385	60.2095	158.42	68.7496	74.1942	107.686	68.9669	201.915	107.839	94.0156	40.1332	74.9585	889.064	42.9671	39.6364	51.2703	37.0987
Average	10	12 h at 21°C, 4 h at 45°C		opr3	49.1933	43.5353	328.013	26.0058	194.18	181.458	279.5	80.327	308.419	141.645	303.024	344.678	127.55	281.32	546.383	180.387	424.105	63.4465	121.119	165.611	143.67	175.591	440.609	107.043	348.548	106.56	540.28	273.673	292.662	104.411	269.482	99.2134	105.972	123.118	95.7692	416.03	125.703	126.768	58.1325	82.6903	997.371	66.6454	58.0338	76.8534	69.0427
Average	11	12 h at 38°C, 4 h at 45°C		opr3	45.3752	32.9947	225.951	23.0342	892.924	169.269	665.526	85.2937	328.611	1486.51	532.057	328.091	85.894	257.044	676.505	118.255	454.776	50.3439	157.064	181.143	483.513	192.469	964.021	92.9232	410.375	97.2918	764.011	5117.71	949.133	116.723	2467.41	87.2059	108.069	195.099	92.6895	1035.76	116.785	118.436	59.5922	86.0587	883.073	57.6165	50.6176	62.6916	59.0396
Average	12	17 h at 21°C		opr3	74.4637	54.1488	262.701	29.5698	166.561	204.163	295.967	99.0474	292.305	90.5383	345.169	249.066	85.2269	132.525	376.754	97.6221	431.21	74.0507	116.873	175.048	129.689	132.056	342.914	120.383	350.569	126.292	598.057	162.594	292.669	111.601	215.465	127.534	122.674	130.45	105.696	266.545	163.854	159.71	68.6097	106.028	1252.52	77.8609	68.0807	85.4102	74.6292
Average	13	12 h at 21°C, 4 h at 45°C, 1 h at 21°C		opr3	51.937	44.3534	358.03	28.6529	188.082	196.03	313.31	96.6752	299.302	108.841	325.135	266.682	108.613	199.057	490.978	139.285	452.633	54.774	118.648	174.634	135.464	148.943	427.354	123.945	374.264	121.853	643.973	177.513	270.989	115.279	219.127	118.273	119.069	137.032	95.9573	357.408	140.94	151.42	63.435	90.3331	1074.52	62.5223	63.1912	84.7834	70.4091
Average	14	12 h at 38°C, 4 h at 45°C, 1 h at 21°C		opr3	41.8037	32.2976	272.625	22.3953	148.94	145.504	281.215	72.0461	271.424	177.264	265.446	254.999	77.5983	184.267	552.536	114.876	374.392	52.0896	102.693	146.566	131.697	162.429	562.907	93.3893	339.604	97.8376	603.93	159.905	245.163	96.0883	193.691	85.9807	95.9636	158.862	80.0076	718.78	113.472	117.419	54.9953	84.0257	937.702	60.4896	48.4638	62.0099	59.6139
Average	15	40 h at 21°C		opr3	41.1307	28.7583	206.8	14.9306	88.5501	122.084	198.709	46.3626	195.823	60.0231	196.588	148.675	48.2223	81.7186	276.841	49.6825	278.611	33.4069	67.883	112.286	68.7532	80.3016	233.022	57.7612	196.629	63.6926	447.868	104.814	193.553	59.3743	149.184	61.0589	65.217	86.2821	56.5071	162.295	93.1351	75.869	34.6497	47.2851	741.118	35.5391	33.1298	44.9718	35.7435
Average	16	12 h at 21°C, 4 h at 45°C, 24 h at 21°C		opr3	37.2478	30.8777	271.563	17.9703	102.394	135.279	219.218	54.4486	193.603	79.3598	210.69	152.679	52.4328	90.9196	379.063	67.6202	298.762	44.3066	73.4074	121.558	73.514	86.1405	259.723	61.937	241.341	70.1239	474.862	99.7122	208.124	61.2628	150.471	55.2981	71.4304	89.0616	57.0728	224.413	92.2497	82.7219	33.3939	62.8424	711.536	39.9842	38.8526	46.2605	37.5397
Average	17	12 h at 38°C, 4 h at 45°C, 24 h at 21°C		opr3	43.7938	36.126	269.386	20.5804	124.918	150.605	282.458	61.4519	212.82	124.325	231.745	163.457	67.2917	123.197	409.449	80.4644	261.447	44.2117	86.1381	131.884	89.9979	96.3347	289.524	74.5607	288.917	82.6584	463.74	106.708	218.875	79.1723	163.379	71.2195	84.2971	94.727	68.2342	312.297	103.064	98.2836	42.1789	71.6725	802.407	47.3832	45.2224	56.7878	44.9079
WT averages arranged by path
Path 1 - WT
Average	1	0 time, 4-wk-old plants, 21°C		WT	70.598	43.9548	436.606	24.6392	152.828	179.984	317.86	75.695	313.284	76.3459	351.622	241.47	85.0504	140.986	442.702	87.1033	505.034	67.0223	125.272	190.623	118.105	107.936	358.052	121.97	343.147	106.227	744.725	139.155	353.067	92.9321	229.164	120.788	116.446	131.745	95.5859	214.878	163.949	151.702	50.6308	106.763	1450.64	68.1825	55.3179	72.1654	61.7523
Average	2	1 h at 21°C		WT	70.4207	41.6894	392.35	25.9858	138.88	167.625	355.528	82.9374	273.312	83.5586	317.846	180.729	72.4123	125.473	398.88	76.0282	378.952	62.9205	121.042	160.57	110.501	112.011	311.951	104.48	308.124	92.2172	686.42	135.712	306.926	88.838	200.967	102.124	113.396	116.035	83.1126	214.392	145.838	148.886	53.6217	89.637	1315.59	57.7152	48.9264	68.749	57.3054
Average	4	12 h at 21°C		WT	101.724	56.9733	530.952	32.4165	213.485	241.479	355.892	111.857	378.099	134.212	467.494	278.713	101.247	164.935	386.034	110.561	578.455	82.6521	158.016	227.784	171.363	145.616	413.135	108.634	436.476	142.055	681.829	199.02	392.141	135.805	277.978	171.275	136.083	181.16	121.077	302.274	207.579	185.611	72.0433	131.55	1671.07	92.4593	75.996	98.2213	77.2291
Average	6	13 h at 21°C		WT	57.42	36.06	311.85	22.83	128.41	152.31	338.89	82.4	244.17	115.23	294.17	188.14	63.13	105.88	311.93	68.17	457.23	55.28	104.51	160.77	101.95	105.58	309.07	70.07	246.27	88.59	677.04	131.25	308.22	83.08	203.89	98.21	85.45	141.89	78.41	209.15	141.97	95.37	51.17	64.8	891.45	52.3	49.1	61.77	52.06
Average	9	16 h at 21°C		WT	58.9	35.87	260.28	19.16	104.74	131.75	216.1	57.69	223.18	84.5	250.49	150.25	48.18	76.9	304.94	48.29	382.04	45.41	79.99	140.29	84.78	94.2	295.95	81.68	235.68	67.34	510.91	116.18	277.12	64.38	175.22	79.2	87.41	126.38	73.9	224.9	123.24	118.14	39.03	69.85	862.38	44.66	41.47	54.21	40.02
Average	12	17 h at 21°C		WT	77.38	44.95	336.6	23.12	148.15	181.31	282.85	78.76	306.59	84.66	340.14	223.78	77.82	113.21	418.03	76.92	387.23	59.45	103.15	213.02	117.13	110.07	335.71	104.7	329.3	102.54	658.26	141.66	295.59	86.57	203.05	108.88	108.42	113.13	88.84	271.34	151.84	140.55	58.19	98.82	1312.68	62.54	56.31	69.31	61.79
Average	15	40 h at 21°C		WT	42.81	29.01	276.46	16.07	92.65	105.66	196.24	47.94	200.22	66.39	202.13	133.33	46.49	82.87	299.41	50.55	352.94	35.39	75.87	125.3	74.94	81.44	247.22	69.34	203.89	64.62	421.37	111.9	230.54	61.13	160.85	70.9	77.51	111.35	61.72	167.7	105.9	96.58	34.92	47	686.28	37.38	36.75	48.22	39.12
Path 2- WT
Average	1	0 time, 4-wk-old plants, 21°C		WT	70.598	43.9548	436.606	24.6392	152.828	179.984	317.86	75.695	313.284	76.3459	351.622	241.47	85.0504	140.986	442.702	87.1033	505.034	67.0223	125.272	190.623	118.105	107.936	358.052	121.97	343.147	106.227	744.725	139.155	353.067	92.9321	229.164	120.788	116.446	131.745	95.5859	214.878	163.949	151.702	50.6308	106.763	1450.64	68.1825	55.3179	72.1654	61.7523
Average	3	1 h at 38°C		WT	54.2316	36.1212	348.399	19.998	151.057	154.221	334.987	71.8248	272.026	78.0409	301.063	193.429	72.5313	132.311	441.652	79.8753	378.749	56.1447	110.238	157.697	107.131	115.216	291.631	89.2644	274.715	95.6908	705.395	136.263	284.857	97.2023	190.752	102.851	102.489	116.58	82.5415	208.665	138.028	128.933	46.0738	74.7546	1012.24	54.823	49.9353	66.4911	52.5018
Average	5	12 h at 38°C		WT	61.2326	38.988	350.292	24.6781	152.313	162.185	279.02	75.9962	270.559	215.491	320.108	220.759	72.3497	138.709	406.337	81.7021	388.619	54.6594	101.358	150.027	116.303	148.6	360.724	81.1892	312.55	97.1871	621.427	158.32	291.879	103.156	174.717	106.951	98.5927	137.323	85.4491	422.952	146.008	117.384	54.0003	75.2364	964.402	59.1837	54.5099	67.3143	60.6739
Average	8	12 h at 38°C, 1 h at 45°C		WT	59.03	36.92	306.59	26.46	145.82	162.62	284.44	86.6	318.02	202.55	303.79	234.31	72.79	151.82	567.96	89.24	493.94	48.74	106.18	172.78	128.83	149.92	579.71	96.91	333.92	98.47	761.88	166.8	276.83	93.85	217.36	97.35	104.77	177.69	92.91	667.89	153.44	140.15	57.09	79.79	972.33	59.35	53.29	66.42	58.43
Average	11	12 h at 38°C, 4 h at 45°C		WT	57.3	34.25	264.05	27.96	275.68	165.09	547.82	100.8	322.96	431.31	355.23	296.34	78.76	192.72	659.8	107.06	508.69	57.29	136.34	184.91	212.35	183.85	741.9	95.3	388.39	90.67	763.05	929.27	446	101.9	610.01	88.47	104.55	163.08	90.67	874.8	126.59	122.93	59.17	86.14	1040.62	67.32	51.92	62.33	60.8
Average	14	12 h at 38°C, 4 h at 45°C, 1 h at 21°C		WT	47.97	34.85	264.56	25.76	151.75	148.79	328.69	79.59	278.37	175.6	285.82	219.36	69.41	133.48	526.65	81.46	468.96	50.99	103.46	150.74	125.78	144.77	468.91	97.04	322.65	96.66	606.72	155.17	294.3	95.69	198.3	94.5	102.9	171.54	82.98	563.31	154.32	131.51	54.64	74.98	879.04	57.58	56.52	64.06	58.72
Average	17	12 h at 38°C, 4 h at 45°C, 24 h at 21°C		WT	56.92	37.52	334.54	25.4	128.93	148.61	388.98	78.66	252.58	132.5	257.9	170.02	66.19	107.6	424.81	71.5	299.89	46.36	98.27	165.47	86.98	92.87	298.9	77.23	287.37	86.74	535.07	116.73	252.03	77.22	192.56	74.28	85.68	95.91	73.35	290.8	115.88	97.39	45.83	74.6	869.57	57.67	45.88	57.82	49.38
Path 3 - WT
Average	1	0 time, 4-wk-old plants, 21°C		WT	70.598	43.9548	436.606	24.6392	152.828	179.984	317.86	75.695	313.284	76.3459	351.622	241.47	85.0504	140.986	442.702	87.1033	505.034	67.0223	125.272	190.623	118.105	107.936	358.052	121.97	343.147	106.227	744.725	139.155	353.067	92.9321	229.164	120.788	116.446	131.745	95.5859	214.878	163.949	151.702	50.6308	106.763	1450.64	68.1825	55.3179	72.1654	61.7523
Average	2	1 h at 21°C		WT	70.4207	41.6894	392.35	25.9858	138.88	167.625	355.528	82.9374	273.312	83.5586	317.846	180.729	72.4123	125.473	398.88	76.0282	378.952	62.9205	121.042	160.57	110.501	112.011	311.951	104.48	308.124	92.2172	686.42	135.712	306.926	88.838	200.967	102.124	113.396	116.035	83.1126	214.392	145.838	148.886	53.6217	89.637	1315.59	57.7152	48.9264	68.749	57.3054
Average	4	12 h at 21°C		WT	101.724	56.9733	530.952	32.4165	213.485	241.479	355.892	111.857	378.099	134.212	467.494	278.713	101.247	164.935	386.034	110.561	578.455	82.6521	158.016	227.784	171.363	145.616	413.135	108.634	436.476	142.055	681.829	199.02	392.141	135.805	277.978	171.275	136.083	181.16	121.077	302.274	207.579	185.611	72.0433	131.55	1671.07	92.4593	75.996	98.2213	77.2291
Average	7	12 h at 21°C, 1 h at 45°C		WT	63.76	38.61	370.03	25.35	140.57	172.46	328	80.69	302.51	110	344.16	242.2	81.35	143.4	409.39	91.56	508.78	64.08	103.16	188.35	117.51	129.4	404.55	93.03	287.19	92.18	818	165.61	326.96	99.9	233.79	112.76	106.98	143.29	88.14	310.64	145.44	129.46	52.5	77.41	1145.57	55.38	52.58	73.53	54.77
Average	10	12 h at 21°C, 4 h at 45°C		WT	66.02	42.94	363.76	26.9	186.79	182.34	343.76	88.73	352.63	126.22	348.09	297.25	106.83	234.32	649.61	141.21	481.22	65.94	125.86	186.99	144.4	155.66	477.05	111.54	370.61	110.66	710.26	223.77	327.8	107.58	256.01	110.64	120.32	142.21	97.4	474.6	153.03	145.84	61.23	96.06	1213.29	72.59	60.06	79.5	72.01
Average	13	12 h at 21°C, 4 h at 45°C, 1 h at 21°C		WT	62.09	44.95	379.21	27.91	178.59	191.51	331.58	85.61	314.64	115.28	336.96	243.9	92.35	167.86	575.57	107.73	476.72	65.79	120.44	176.75	135.44	131.11	432.68	116.38	379.87	122.12	676.41	167.38	300.75	102.69	231.14	118.11	121.08	150.25	96.93	370.53	157.35	151.36	63.77	89.87	1185.61	65.11	60.66	81.64	66.79
Average	16	12 h at 21°C, 4 h at 45°C, 24 h at 21°C		WT	47.59	35.26	307.04	22.35	125.67	155.59	364.67	73.86	241.82	102.24	248.21	196.06	58.14	98.99	467.5	67.27	390.1	44.7	92.05	165.47	90.05	87.94	302.05	72.99	272.01	76.14	613.98	154.01	259.57	76.07	227.65	70.97	86.11	117.8	64.88	269.27	116.78	93.77	46.89	69.56	802.48	51.07	45.65	53.34	43.64
opr3 averages arranged by path
Path 1 - opr3
Average	1	0 time, 4-wk-old plants, 21°C		opr3	59.4368	44.2335	455.067	26.0252	155.378	181.573	305.7	88.8242	291.276	72.3309	325.22	258.878	88.9816	145.393	368.226	95.0475	422.688	65.3426	123.482	190.489	120.71	112.94	325.314	126.674	329.029	110.601	699.598	138.719	302.411	93.9492	212.072	112.816	125.429	110.3	92.5951	201.214	142.006	165.34	50.3613	109.496	1361.75	69.9452	52.0701	73.9474	60.6087
Average	2	1 h at 21°C		opr3	57.614	44.6929	404.594	25.0818	153.473	174.915	320.969	88.0949	280.987	75.2687	324.15	220.538	87.7918	150.808	376.213	96.1322	381.605	73.5348	118.048	174.28	120.551	115.648	311.066	114.663	338.376	106.298	646.413	143.836	292.988	95.0422	198.709	119.47	117.437	106.86	85.2563	200.337	142.076	145.805	53.5077	88.762	1219.11	62.7898	51.7131	73.4024	63.9868
Average	4	12 h at 21°C		opr3	72.17	49.0314	392.617	28.2935	185.594	204.326	330.001	93.0728	310.283	108.377	370.052	258.831	89.4493	145.88	332.44	94.3084	509.817	65.682	134.534	181.498	138.254	136.334	320.39	93.8568	378.891	130.608	604.939	176.301	313.656	112.998	218.856	130.379	120.308	146.198	110.109	259.837	162.606	148.634	66.7853	111.717	1453.16	74.9509	59.7189	84.182	64.6633
Average	6	13 h at 21°C		opr3	41.9799	30.716	272.019	17.6927	114.426	138.57	243.986	67.297	217.365	108.194	262.943	173.36	56.4909	112.58	246.422	66.1966	402.224	49.7104	83.7941	127.101	96.1134	103.07	288.861	71.3388	229.307	82.4766	549.286	129.196	259.85	78.9293	180.055	82.1483	85.7492	130.468	73.2423	172.061	125.515	100.293	45.6234	53.6319	726.389	43.6279	44.4107	57.6888	46.3397
Average	9	16 h at 21°C		opr3	47.7881	32.7296	213.243	16.8835	99.5781	132.028	193.864	48.6066	207.362	70.1921	217.094	165.826	47.7351	80.7052	290.672	51.6077	337.948	39.566	73.7642	128.793	79.678	85.2199	274.433	66.9062	221.943	69.3648	498.233	119.019	230.385	60.2095	158.42	68.7496	74.1942	107.686	68.9669	201.915	107.839	94.0156	40.1332	74.9585	889.064	42.9671	39.6364	51.2703	37.0987
Average	12	17 h at 21°C		opr3	74.4637	54.1488	262.701	29.5698	166.561	204.163	295.967	99.0474	292.305	90.5383	345.169	249.066	85.2269	132.525	376.754	97.6221	431.21	74.0507	116.873	175.048	129.689	132.056	342.914	120.383	350.569	126.292	598.057	162.594	292.669	111.601	215.465	127.534	122.674	130.45	105.696	266.545	163.854	159.71	68.6097	106.028	1252.52	77.8609	68.0807	85.4102	74.6292
Average	15	40 h at 21°C		opr3	41.1307	28.7583	206.8	14.9306	88.5501	122.084	198.709	46.3626	195.823	60.0231	196.588	148.675	48.2223	81.7186	276.841	49.6825	278.611	33.4069	67.883	112.286	68.7532	80.3016	233.022	57.7612	196.629	63.6926	447.868	104.814	193.553	59.3743	149.184	61.0589	65.217	86.2821	56.5071	162.295	93.1351	75.869	34.6497	47.2851	741.118	35.5391	33.1298	44.9718	35.7435
Path 2- opr
Average	1	0 time, 4-wk-old plants, 21°C		opr3	59.4368	44.2335	455.067	26.0252	155.378	181.573	305.7	88.8242	291.276	72.3309	325.22	258.878	88.9816	145.393	368.226	95.0475	422.688	65.3426	123.482	190.489	120.71	112.94	325.314	126.674	329.029	110.601	699.598	138.719	302.411	93.9492	212.072	112.816	125.429	110.3	92.5951	201.214	142.006	165.34	50.3613	109.496	1361.75	69.9452	52.0701	73.9474	60.6087
Average	3	1 h at 38°C		opr3	46.3045	36.3512	408.237	21.2013	154.626	159.914	300.921	74.5787	250.37	69.1654	283.644	186.158	83.9465	146.028	346.045	87.6186	301.4	62.6158	103.168	143.732	107.028	117.191	251.675	84.5276	252.255	102.745	595.906	138.348	231.387	94.7089	161.148	109.701	100.633	88.6376	81.4333	183.502	123.458	130.168	44.4717	70.6152	868.467	52.6358	46.6868	68.5846	53.0895
Average	5	12 h at 38°C		opr3	54.0192	40.2221	259.972	25.6658	156.21	174.883	310.335	74.5715	291.633	203.011	317.467	267.64	81.5265	174.623	398.743	98.2339	401.086	58.3594	110.014	157.338	136.263	162.116	414.932	92.5516	308.152	102.206	652.618	178.119	268.684	113.65	191.56	106.765	111.526	142.973	93.869	519.309	142.607	139.16	61.2834	84.5937	982.178	59.9878	55.0715	73.0398	70.6707
Average	8	12 h at 38°C, 1 h at 45°C		opr3	51.1603	39.312	315.168	26.376	158.734	174.631	252.256	89.8006	349.194	185.879	307.278	289.445	92.6852	200.204	573.565	127.797	453.716	58.533	121.046	182.123	155.052	169.923	635.078	114.842	358.392	113.774	764.279	192.184	258.707	110.456	221.074	102.386	121.732	181.118	97.468	772.304	162.112	155.25	70.261	83.0394	849.429	66.6087	59.7753	70.2156	62.7492
Average	11	12 h at 38°C, 4 h at 45°C		opr3	45.3752	32.9947	225.951	23.0342	892.924	169.269	665.526	85.2937	328.611	1486.51	532.057	328.091	85.894	257.044	676.505	118.255	454.776	50.3439	157.064	181.143	483.513	192.469	964.021	92.9232	410.375	97.2918	764.011	5117.71	949.133	116.723	2467.41	87.2059	108.069	195.099	92.6895	1035.76	116.785	118.436	59.5922	86.0587	883.073	57.6165	50.6176	62.6916	59.0396
Average	14	12 h at 38°C, 4 h at 45°C, 1 h at 21°C		opr3	41.8037	32.2976	272.625	22.3953	148.94	145.504	281.215	72.0461	271.424	177.264	265.446	254.999	77.5983	184.267	552.536	114.876	374.392	52.0896	102.693	146.566	131.697	162.429	562.907	93.3893	339.604	97.8376	603.93	159.905	245.163	96.0883	193.691	85.9807	95.9636	158.862	80.0076	718.78	113.472	117.419	54.9953	84.0257	937.702	60.4896	48.4638	62.0099	59.6139
Average	17	12 h at 38°C, 4 h at 45°C, 24 h at 21°C		opr3	43.7938	36.126	269.386	20.5804	124.918	150.605	282.458	61.4519	212.82	124.325	231.745	163.457	67.2917	123.197	409.449	80.4644	261.447	44.2117	86.1381	131.884	89.9979	96.3347	289.524	74.5607	288.917	82.6584	463.74	106.708	218.875	79.1723	163.379	71.2195	84.2971	94.727	68.2342	312.297	103.064	98.2836	42.1789	71.6725	802.407	47.3832	45.2224	56.7878	44.9079
Path 3 - opr3
Average	1	0 time, 4-wk-old plants, 21°C		opr3	59.4368	44.2335	455.067	26.0252	155.378	181.573	305.7	88.8242	291.276	72.3309	325.22	258.878	88.9816	145.393	368.226	95.0475	422.688	65.3426	123.482	190.489	120.71	112.94	325.314	126.674	329.029	110.601	699.598	138.719	302.411	93.9492	212.072	112.816	125.429	110.3	92.5951	201.214	142.006	165.34	50.3613	109.496	1361.75	69.9452	52.0701	73.9474	60.6087
Average	2	1 h at 21°C		opr3	57.614	44.6929	404.594	25.0818	153.473	174.915	320.969	88.0949	280.987	75.2687	324.15	220.538	87.7918	150.808	376.213	96.1322	381.605	73.5348	118.048	174.28	120.551	115.648	311.066	114.663	338.376	106.298	646.413	143.836	292.988	95.0422	198.709	119.47	117.437	106.86	85.2563	200.337	142.076	145.805	53.5077	88.762	1219.11	62.7898	51.7131	73.4024	63.9868
Average	4	12 h at 21°C		opr3	72.17	49.0314	392.617	28.2935	185.594	204.326	330.001	93.0728	310.283	108.377	370.052	258.831	89.4493	145.88	332.44	94.3084	509.817	65.682	134.534	181.498	138.254	136.334	320.39	93.8568	378.891	130.608	604.939	176.301	313.656	112.998	218.856	130.379	120.308	146.198	110.109	259.837	162.606	148.634	66.7853	111.717	1453.16	74.9509	59.7189	84.182	64.6633
Average	7	12 h at 21°C, 1 h at 45°C		opr3	54.9806	36.796	278.66	21.7202	135.384	157.748	273.797	77.8777	261.359	91.8564	285.405	239.435	84.4117	151.378	339.294	98.6391	392.358	52.8855	93.175	148.005	110.667	134.829	342.882	78.9783	272.39	95.0628	669.07	157.974	272.064	97.5116	196.317	100.043	91.9205	116.117	81.1521	258.942	123.341	111.35	44.1602	72.9915	993.627	49.4053	46.8391	70.0873	51.901
Average	10	12 h at 21°C, 4 h at 45°C		opr3	49.1933	43.5353	328.013	26.0058	194.18	181.458	279.5	80.327	308.419	141.645	303.024	344.678	127.55	281.32	546.383	180.387	424.105	63.4465	121.119	165.611	143.67	175.591	440.609	107.043	348.548	106.56	540.28	273.673	292.662	104.411	269.482	99.2134	105.972	123.118	95.7692	416.03	125.703	126.768	58.1325	82.6903	997.371	66.6454	58.0338	76.8534	69.0427
Average	13	12 h at 21°C, 4 h at 45°C, 1 h at 21°C		opr3	51.937	44.3534	358.03	28.6529	188.082	196.03	313.31	96.6752	299.302	108.841	325.135	266.682	108.613	199.057	490.978	139.285	452.633	54.774	118.648	174.634	135.464	148.943	427.354	123.945	374.264	121.853	643.973	177.513	270.989	115.279	219.127	118.273	119.069	137.032	95.9573	357.408	140.94	151.42	63.435	90.3331	1074.52	62.5223	63.1912	84.7834	70.4091
Average	16	12 h at 21°C, 4 h at 45°C, 24 h at 21°C		opr3	37.2478	30.8777	271.563	17.9703	102.394	135.279	219.218	54.4486	193.603	79.3598	210.69	152.679	52.4328	90.9196	379.063	67.6202	298.762	44.3066	73.4074	121.558	73.514	86.1405	259.723	61.937	241.341	70.1239	474.862	99.7122	208.124	61.2628	150.471	55.2981	71.4304	89.0616	57.0728	224.413	92.2497	82.7219	33.3939	62.8424	711.536	39.9842	38.8526	46.2605	37.5397
[truncated: 250 more columns]

## Sheet: Table S5
Table S5. Head group class amounts (normalized intensity per mg of leaf dry mass, where a signal of 1 corresponds to the same amount of signal as derived from 1 pmol of internal standard(s)) at 16-h time point in heat stress experiment (Figure 1). Data from 17 or 18 biological replicates of each of three treatments are shown for wild-type Col-0 plants. Tray numbers and the associated treatments a…
Sample name ("H" for "heat"+Block number.Tray number.Well number in tray)	Tray number	Treatment	Path(s)	Genotype	acMGDG	DAG	DGDG	DGMG	LPC	LPE	MGDG	MGMG	PA	PC	PE	PG	SG	ASG	Sterol esters	SQDG	TAG	TrGDG plus TeGDG
H1.09.09	9	16 h at 21°C	1	WT	4305.36	16.7688	96886.4	289.714	97.389	133.634	632494	1332.1	146.339	18559.3	26828.2	20624.9	5520.44	26523.5	34.393	1190.06	570.559	765.765
H1.09.22	9	16 h at 21°C	1	WT	3217.13	15.5967	93768.8	254.996	94.674	139.251	598843	1179.63	163.834	17936.8	25936.5	18932.1	5724.64	28206.6	37.3792	1094.03	635.119	618.854
H1.09.23	9	16 h at 21°C	1	WT	5107.87	15.3858	104010	287.08	97.6498	141.29	681078	1247.88	199.043	18038.4	26386	19401.2	6509.1	32199.3	31.2952	1141.17	642.178	801.037
H1.09.28	9	16 h at 21°C	1	WT	4773.39	15.7743	114946	299.957	124.78	162.254	848376	1251.39	183.501	22166.4	31869.7	25118.3	5699.47	25688.9	26.2046	1366.13	333.52	706.075
H1.09.54	9	16 h at 21°C	1	WT	4293.78	15.4497	104649	254.906	98.4656	126.828	687960	1092.05	235.954	17915.6	24143.4	20264.7	6418.29	30128.5	31.728	1121.15	531.286	692.393
H1.09.71	9	16 h at 21°C	1	WT	4481.45	15.0814	109020	300.328	118.372	140.529	740742	1218.96	164.439	18884.7	25779.5	20106.7	7757.12	32961	33.6396	1232.69	469.152	589.413
H2.09.08	9	16 h at 21°C	1	WT	9967.14	16.0473	138750	387.003	162.41	223.739	1.31261e+06	2107.68	403.091	31688.5	46640.4	40558	7077.87	30668	9.44806	2071.59	66.7692	1165.36
H2.09.14	9	16 h at 21°C	1	WT	8837.11	14.1851	125874	310.629	125.893	161.507	1.2244e+06	1991.62	375.986	27939.5	41850.7	36346.3	6177.5	24175.7	10.8013	1871.49	61.4789	912.21
H2.09.24	9	16 h at 21°C	1	WT	8894.9	15.4485	127574	333.419	138.343	208.776	1.32193e+06	2202.4	349.564	31432.6	48448.6	41144.2	5567.37	23363.1	5.78419	2037.29	65.8626	697.277
H2.09.51	9	16 h at 21°C	1	WT	9079.88	15.2431	122011	286.386	140.908	191.79	1.24628e+06	1766.89	294.04	30285.9	46114.9	38363.3	5833.7	24114.7	6.29547	1865.8	70.4812	652.812
H2.09.53	9	16 h at 21°C	1	WT	8964.83	13.5973	114134	289.308	130.663	235.858	1.179e+06	1788.95	263.663	29921.2	45151.7	36737.9	6244.02	24686.3	4.1905	1890.15	64.0737	692.901
H3.09.01	9	16 h at 21°C	1	WT	9603.55	17.0055	162763	221.861	109.125	111.019	1.60345e+06	1885.62	326.274	30546.1	45140.7	44991.4	7858.53	27274.2	18.7521	3224.45	82.7122	1043.73
H3.09.05	9	16 h at 21°C	1	WT	9143.43	15.5313	164998	285.733	105.968	105.876	1.65808e+06	2058.97	307.931	31854.5	45634.8	44734.7	7860.31	24959.8	20.8921	3395.89	64.1711	927.012
H3.09.28	9	16 h at 21°C	1	WT	8483.61	20.289	165154	204.455	108.576	109.313	1.57596e+06	2108	328.104	31883.7	46873.9	44506	8893.39	27940	23.9974	3288.55	107.07	1933.95
H3.09.29	9	16 h at 21°C	1	WT	11481	15.119	170714	272.656	117.32	129.66	1.68471e+06	2444.4	355.804	34868.2	50442.9	45872.2	8557.63	32048	11.0741	3538.39	73.0041	1516.79
H3.09.34	9	16 h at 21°C	1	WT	11727.5	15.3091	171707	280.058	102.257	115.671	1.7339e+06	2032.26	394.138	34147.7	49364.2	48905.7	8069.97	28337.4	16.5938	3417.11	65.7963	3329.42
H3.09.45	9	16 h at 21°C	1	WT	11181.9	17.0772	179347	309.542	103.963	108.867	1.82943e+06	2333.77	289.339	36402.1	53307.2	49592.5	8466.36	28376.3	17.961	3667.02	61.5481	1014.44
H1.10.09	10	12 h at 21°C, 4 h at 45°C	3	WT	11888.1	11.7795	114191	306.466	103.051	105.319	938079	1965.33	335.313	20597.3	26084.1	28136.6	10058.8	49737.1	3.99041	1571.44	1141.4	1420.47
H1.10.22	10	12 h at 21°C, 4 h at 45°C	3	WT	12438.1	12.9323	114566	421.785	127.011	229.202	993093	3992.97	550.52	26607	43397.9	34366.5	9120.1	50675.3	3.173	1787.68	1150.69	1243.63
H1.10.23	10	12 h at 21°C, 4 h at 45°C	3	WT	11944	14.0904	132411	412.252	125.114	185.581	1.18174e+06	3983.29	621.059	26493.7	44972.7	38676.8	9604.91	46119.4	5.92881	1963.43	1063.24	1255.99
H1.10.28	10	12 h at 21°C, 4 h at 45°C	3	WT	9493.7	12.5743	131343	330.226	108.894	137.016	1.15702e+06	2912.16	340.729	26647.3	40241.7	40289.5	8110.97	36750.5	5.74055	2075.18	1129.29	1134.82
H1.10.54	10	12 h at 21°C, 4 h at 45°C	3	WT	9476.58	12.875	122078	461.996	141.824	196.6	1.09404e+06	3265.34	418.945	26265.1	39781.4	37813.4	8696.79	45056.4	4.91234	1996.34	1189.94	1064.98
H1.10.71	10	12 h at 21°C, 4 h at 45°C	3	WT	12345.5	11.9288	143504	588.974	182.264	254.493	1.29472e+06	3771.72	553.423	27449.5	41269.3	41631.8	10369.1	49953.9	5.04266	2293.54	1324.54	1654.79
H2.10.08	10	12 h at 21°C, 4 h at 45°C	3	WT	11379	13.9433	149451	414.605	114.716	147.666	1.36127e+06	2539.94	434.03	27235.1	37509.1	40227.2	13237	49101.8	6.92695	2283.11	1007.07	986.844
H2.10.14	10	12 h at 21°C, 4 h at 45°C	3	WT	13233.7	13.6285	158943	426.808	107.06	143.696	1.46617e+06	2558.31	466.274	26907.6	39183.6	44340.1	12210.7	49525.2	6.46239	2430.44	1093.93	1067.77
H2.10.24	10	12 h at 21°C, 4 h at 45°C	3	WT	11756.9	12.7357	140621	350.94	103.315	132.161	1.33106e+06	2208.17	299.717	26068.5	37571.5	41359.2	10011.4	42516.8	5.76786	2180.04	930.384	1047.23
H2.10.51	10	12 h at 21°C, 4 h at 45°C	3	WT	10676	13.7832	146224	391.786	136.139	149.223	1.33371e+06	2537.85	487.51	28454.7	41482.1	42458.2	11881.4	50506.6	4.20236	2110.43	866.977	809.266
H2.10.53	10	12 h at 21°C, 4 h at 45°C	3	WT	11376.5	13.8535	152500	454.511	121.51	164.298	1.39368e+06	2687.87	512.783	26577.3	37567.6	44155.4	11384.2	46542.2	7.13633	2318.22	1079.54	966.14
H2.10.71	10	12 h at 21°C, 4 h at 45°C	3	WT	12229	13.355	153681	372.005	105.82	116.458	1.42073e+06	2439.16	400.24	26973.2	38911.5	43694.7	11320	47954.6	5.97829	2391.73	911.406	1082.14
H3.10.01	10	12 h at 21°C, 4 h at 45°C	3	WT	15800.1	17.747	179926	1201.09	179.165	207.933	1.45665e+06	6921.06	600.963	31052.2	37316.4	51859.6	29294.5	142875	4.9779	3679.48	3660.32	7452.46
H3.10.05	10	12 h at 21°C, 4 h at 45°C	3	WT	12526.1	15.3508	154673	683.639	151.589	197.602	1.28949e+06	3661.23	770.686	26465.1	35039.7	44558.7	24465.1	139904	2.51353	2558.51	2918.22	4477.39
H3.10.28	10	12 h at 21°C, 4 h at 45°C	3	WT	11569.6	18.4278	158302	487.369	121.932	142.912	1.35347e+06	3485.38	429.497	26728.9	36462	44769.1	20034.7	118684	2.73674	2444.15	2499.87	1643.52
H3.10.29	10	12 h at 21°C, 4 h at 45°C	3	WT	12430.4	16.4695	145971	677.872	143.684	148.483	1.25448e+06	3607.37	530.639	26426.7	34513.1	42620.9	19210.5	107411	2.23715	2306.12	2680.15	2197.9
H3.10.34	10	12 h at 21°C, 4 h at 45°C	3	WT	14865.8	18.0385	156890	882.649	145.101	174.986	1.28588e+06	4474.58	732.389	26587.5	33739.5	47880	24969.6	129962	3.02181	2528.46	3352.96	7043.34
H3.10.45	10	12 h at 21°C, 4 h at 45°C	3	WT	14503.1	19.478	168384	802.299	154.497	183.216	1.43488e+06	3960.07	675.924	24866.5	32023.7	44242.9	28227.4	145802	2.51697	2462.11	2920.11	5136.46
H1.11.09	11	12 h at 38°C, 4 h at 45°C	2	WT	6963.84	12.6458	111748	267.544	89.5466	111.568	730185	1793.51	218.022	19647.3	26319	22625.4	9766.44	50320.2	7.89359	1396.66	1525.36	1171.07
H1.11.22	11	12 h at 38°C, 4 h at 45°C	2	WT	9160.39	14.3144	126447	285.919	98.1813	116.066	891857	1807.58	190.728	23123	30651.1	26373.4	10060.7	53843.7	7.80485	1741.48	1456.34	1322.3
H1.11.23	11	12 h at 38°C, 4 h at 45°C	2	WT	8431.92	13.1418	124737	306.68	98.9282	114.022	878403	1812.27	182.533	21812.6	29462.4	25743	10498.3	52751.7	6.3262	1686.73	1433.11	1338.45
H1.11.28	11	12 h at 38°C, 4 h at 45°C	2	WT	7552.7	12.8361	118226	282.778	95.8042	107.782	790926	1715.42	205.038	21118.7	26473	23676.4	9977.17	49453.1	7.94313	1515.06	1433.75	1315.78
H1.11.54	11	12 h at 38°C, 4 h at 45°C	2	WT	6911.76	12.9901	110593	305.662	89.4117	108.559	718226	2080.65	255.333	19541.2	26793.7	22372.6	9666.31	51829.1	9.59303	1402.22	1468.13	1101.56
H1.11.71	11	12 h at 38°C, 4 h at 45°C	2	WT	7366.72	12.4448	113483	288.868	95.0861	104.785	770264	1840.96	245.8	19907.5	28016.8	24474.6	9802.12	52008.7	8.48525	1477.15	1395.47	1181.79
H2.11.08	11	12 h at 38°C, 4 h at 45°C	2	WT	12632.6	13.264	133497	442.566	146.43	157.273	1.16332e+06	2331.91	298.5	27714.1	37409.2	34835.1	9255.23	51517.4	5.60796	1896.78	811.519	1042.14
H2.11.14	11	12 h at 38°C, 4 h at 45°C	2	WT	11157.7	14.4681	134378	435.502	174.85	179.129	1.18619e+06	2297.41	297.941	28594.3	38226.5	36310.7	10381.4	54841.3	5.64105	2105.37	757.025	2134.22
H2.11.24	11	12 h at 38°C, 4 h at 45°C	2	WT	11629.9	13.4063	144193	540.607	175.065	197.261	1.26609e+06	3174.84	403.161	31421.7	41178.1	40445.9	9538.51	54357.5	6.43208	2094.65	918.153	1024.65
H2.11.51	11	12 h at 38°C, 4 h at 45°C	2	WT	16566.9	13.2924	123712	339.907	141.19	162.239	1.11128e+06	1921.38	285.446	27058.1	37194.4	32763.3	9053.79	54524.4	3.90502	1810.46	613.143	1101.07
H2.11.71	11	12 h at 38°C, 4 h at 45°C	2	WT	14262.4	14.2197	127719	499.192	217.008	207.706	1.08745e+06	2904.12	359.831	26590.6	35680.5	36061.6	10656.5	63595	5.79127	1879.21	1141.32	3184.69
H3.11.01	11	12 h at 38°C, 4 h at 45°C	2	WT	24532.9	24.0641	163145	1112.71	252.551	288.935	1.17757e+06	5647.93	1072.49	27237.4	30245.1	43839.8	30967.3	216512	3.6707	3177.06	4216.15	17576.2
H3.11.05	11	12 h at 38°C, 4 h at 45°C	2	WT	56343.8	61.3231	127127	1243.95	369.844	347.72	736016	4071.64	1620.4	18477.4	22188.9	32036.6	26749.6	252734	2.67489	2083.52	3733.37	22667.2
H3.11.28	11	12 h at 38°C, 4 h at 45°C	2	WT	23117.4	15.9596	151192	959.257	141.984	172.886	1.27436e+06	5233.54	734.473	30941.9	36003.7	42213.6	30829.2	160777	2.39236	2445.18	3296.19	2320.62
H3.11.29	11	12 h at 38°C, 4 h at 45°C	2	WT	23604.2	14.5905	126628	607.995	138.757	142.353	1.07344e+06	4064.54	749.639	25439.1	29527.3	37588.2	23959.6	130416	1.79552	2089.81	2843.92	2904.38
H3.11.34	11	12 h at 38°C, 4 h at 45°C	2	WT	13309.2	15.7457	142544	628.663	183.782	200.464	1.21032e+06	3700.8	513.425	28070.8	32717.8	43498.5	30505.2	147995	1.43207	2327.3	3087.35	4836.7
H3.11.45	11	12 h at 38°C, 4 h at 45°C	2	WT	16459.3	18.948	138792	597.631	218.598	260.562	1.12648e+06	4005.08	675.356	25536.2	29673.4	42309.2	29427.8	155633	1.35481	2355.5	3130.38	9427.59
Averages
Path 1 (control)	9	16 h at 21°C	1	WT	7855.52	15.8182	133312	286.355	116.28	149.757	1.20937e+06	1767.21	281.238	27321.8	39994.9	35070.6	6955.04	27744.2	20.0253	2200.76	233.222	1062.32
12 h at 38°C, 4 h at 45°C	11	12 h at 38°C, 4 h at 45°C	2	WT	15882.6	17.5091	130480	537.967	160.413	175.253	1.01132e+06	2964.92	488.713	24837.2	31633	33362.8	16535	97241.7	5.22022	1969.65	1956.51	4450.02
12 h at 21°C, 4 h at 45°C	10	12 h at 21°C, 4 h at 45°C	3	WT	12218.5	14.6106	145759	537.071	131.816	167.603	1.28001e+06	3387.32	508.925	26578	37614.8	41837.8	15122.6	74948.8	4.62589	2298.91	1717.78	2315.84
Standard deviations
Path 1 (control)	9	16 h at 21°C	1	WT	2837.04	1.45242	29568.8	41.0334	18.7942	41.671	433650	450.556	85.2417	6740.36	10423.7	11562.1	1174.61	3051.26	11.0352	987.648	235.552	681.81
12 h at 38°C, 4 h at 45°C	11	12 h at 38°C, 4 h at 45°C	2	WT	11957.1	11.6519	14224.1	301.511	73.9259	70.2626	204219	1275.55	385.115	4136.24	5195.95	7806.15	9432.3	66458.1	2.66921	453.641	1154.77	6321.93
12 h at 21°C, 4 h at 45°C	10	12 h at 21°C, 4 h at 45°C	3	WT	1642.18	2.38952	17629.7	233.213	24.4307	39.3425	153327	1141.94	134.577	1942.16	4396.21	5143.81	7194.49	41571.4	1.62471	433.507	971.029	2153.6
					acMGDG	DAG	DGDG	DGMG	LPC	LPE	MGDG	MGMG	PA	PC	PE	PG	SG	ASG	Sterol esters	SQDG	TAG	TrGDG plus TeGDG
				False Discovery Rate	0.014004			0.0067958	0.038539		0.042681	0.00058189	0.033556		0.01039	0.015589	0.00084124	0.00058189	2.8776e-07		1.9191e-05	0.046812
				Significant comparisons by one-way ANOVA and FDR, with Tukey's HSD posthoc test	12 h at 38°C, 4 h at 45°C -16 h at 21°C			12 h at 38°C, 4 h at 45°C -16 h at 21°C; 12 h at 21°C, 4 h at 45°C -16 h at 21°C	12 h at 38°C, 4 h at 45°C -16 h at 21°C		12 h at 21°C, 4 h at 45°C -12 h at 38°C, 4 h at 45°C	12 h at 38°C, 4 h at 45°C -16 h at 21°C; 12 h at 21°C, 4 h at 45°C -16 h at 21°C	12 h at 38°C, 4 h at 45°C -16 h at 21°C; 12 h at 21°C, 4 h at 45°C -16 h at 21°C		12 h at 38°C, 4 h at 45°C -16 h at 21°C; 12 h at 21°C, 4 h at 45°C -12 h at 38°C, 4 h at 45°C	12 h at 21°C, 4 h at 45°C -16 h at 21°C; 12 h at 21°C, 4 h at 45°C -12 h at 38°C, 4 h at 45°C	12 h at 38°C, 4 h at 45°C -16 h at 21°C; 12 h at 21°C, 4 h at 45°C -16 h at 21°C	12 h at 38°C, 4 h at 45°C -16 h at 21°C; 12 h at 21°C, 4 h at 45°C -16 h at 21°C	12 h at 38°C, 4 h at 45°C -16 h at 21°C; 12 h at 21°C, 4 h at 45°C -16 h at 21°C		12 h at 38°C, 4 h at 45°C -16 h at 21°C; 12 h at 21°C, 4 h at 45°C -16 h at 21°C	12 h at 38°C, 4 h at 45°C -16 h at 21°C

## Sheet: Table S6
Table S6. Lipids with significant changes in heating treatment of wild-type plants at each time point. For each lipid, a split plot ANOVA model was fitted to the data, and pairwise comparisons were made between paths. The p-values for all effects from all three pairwise comparisons were recorded, and the adjusted p-values based on false discovery rate control [FDR; reference 53, i.e., Benjamini a…
Time (h)	Lipid number	Lipid name	Path comparison	p value (FDR)	Tukey adjusted p value for two sided H1
1	lipid0599	acDGDG(18:4-O/34:6)	Path2 - Path1	6e-06	0
1	lipid0566	acMGDG(18:3-2O/34:6)	Path2 - Path1	0.014908	0.00282
1	lipid0285	DAG(18:2/18:3)	Path2 - Path1	0.048254	0.012948
1	lipid0052	LPE(16:0)	Path2 - Path1	0.039465	0.009938
1	lipid0328	MGDG(18:5-2O/16:4-O) or MGDG(20:3/16:4-O)	Path2 - Path1	0.015578	0.002973
1	lipid0030	PC(32:0)	Path2 - Path1	0.011917	0.002153
1	lipid0049	PC(40:3)	Path2 - Path1	0.0023	0.000252
1	lipid0048	PC(40:4)	Path2 - Path1	0.001131	0.000106
1	lipid0618	PE(16:0/18:3-O)	Path2 - Path1	0.006229	0.000878
1	lipid0620	PE(18:2/18:3-O)	Path2 - Path1	2.1e-05	1e-06
1	lipid0619	PE(18:3/18:3-O)	Path2 - Path1	0.000167	1.2e-05
1	lipid0280	TAG(18:2/36:5)	Path2 - Path1	0.035444	0.008584
1	lipid0309	TeGDG(36:6)	Path2 - Path1	0.000338	2.5e-05
12	lipid0448	acMGDG(16:3/34:6)	Path2 - Path1	0.006067	0.000846
12	lipid0255	Campesterol-Glc(16:0)	Path2 - Path1	0	0
12	lipid0161	DGDG(34:6)	Path2 - Path1	0.003581	0.000425
12	lipid0818	Sitosterol-Glc(18:4-O)	Path2 - Path1	0.038568	0.009626
12	lipid0030	PC(32:0)	Path2 - Path1	0	0
12	lipid0062	PE(34:3)	Path2 - Path1	0.009363	0.001553
12	lipid0065	PE(36:6)	Path2 - Path1	3e-06	0
12	lipid0257	Sitosterol-Glc(16:0)	Path2 - Path1	0	0
12	lipid0256	Stigmasterol-Glc(16:0)	Path2 - Path1	0	0
12	lipid1060	TAG(16:0/34:6)	Path2 - Path1	0	0
12	lipid0280	TAG(18:2/36:5)	Path2 - Path1	0	0
12	lipid0276	TAG(18:3/34:2)	Path2 - Path1	1.9e-05	1e-06
12	lipid1062	TAG(18:3/34:6)	Path2 - Path1	0	0
12	lipid0278	TAG(18:3/36:5)	Path2 - Path1	0	0
12	lipid0277	TAG(18:3/36:6)	Path2 - Path1	5.9e-05	4e-06
12	lipid0309	TeGDG(36:6)	Path2 - Path1	0.009003	0.001464
13	lipid0448	acMGDG(16:3/34:6)	Path2 - Path1	0.000851	7.4e-05
13	lipid0448	acMGDG(16:3/34:6)	Path3 - Path2	0.000352	2.6e-05
13	lipid0248	Campesterol-Glc	Path2 - Path1	0	0
13	lipid0248	Campesterol-Glc	Path3 - Path1	0	0
13	lipid0255	Campesterol-Glc(16:0)	Path2 - Path1	8e-06	0
13	lipid0255	Campesterol-Glc(16:0)	Path3 - Path1	0.00086	7.5e-05
13	lipid0261	Campesterol-Glc(18:2)	Path2 - Path1	0.001054	9.7e-05
13	lipid0258	Campesterol-Glc(18:3)	Path2 - Path1	0.002573	0.000287
13	lipid0160	DGMG(18:4-O)	Path3 - Path1	0.031519	0.007344
13	lipid0028	LPC(18:1)	Path3 - Path1	0.003669	0.000437
13	lipid0028	LPC(18:1)	Path2 - Path1	0.007118	0.001052
13	lipid0027	LPC(18:2)	Path3 - Path1	5.2e-05	3e-06
13	lipid0027	LPC(18:2)	Path3 - Path2	0.038043	0.009447
13	lipid0135	MGMG(18:3)	Path3 - Path1	0.002136	0.000231
13	lipid0030	PC(32:0)	Path2 - Path1	0	0
13	lipid0030	PC(32:0)	Path3 - Path1	0	0
13	lipid0030	PC(32:0)	Path3 - Path2	0	0
13	lipid0841	PC(32:1)	Path2 - Path1	0.005154	0.000675
13	lipid0840	PC(32:3)	Path2 - Path1	0	0
13	lipid0840	PC(32:3)	Path3 - Path1	0	0
13	lipid0840	PC(32:3)	Path3 - Path2	0	0
13	lipid0842	PC(34:6)	Path2 - Path1	0	0
13	lipid0842	PC(34:6)	Path3 - Path1	0.000758	6.4e-05
13	lipid0842	PC(34:6)	Path3 - Path2	0	0
13	lipid0620	PE(18:2/18:3-O)	Path2 - Path1	0.024264	0.005175
13	lipid0620	PE(18:2/18:3-O)	Path3 - Path1	0.027064	0.005967
13	lipid0619	PE(18:3/18:3-O)	Path2 - Path1	0.038815	0.009711
13	lipid0057	PE(32:3)	Path2 - Path1	0	0
13	lipid0057	PE(32:3)	Path3 - Path1	0.008312	0.001304
13	lipid0057	PE(32:3)	Path3 - Path2	0	0
13	lipid0008	PG(32:0)	Path2 - Path1	0.010612	0.001869
13	lipid0821	Sitosterol(18:2)	Path2 - Path1	0.006867	0.001002
13	lipid0289	Sitosterol(18:3)	Path2 - Path1	2e-06	0
13	lipid0289	Sitosterol(18:3)	Path3 - Path1	0.011995	0.00217
13	lipid0250	Sitosterol-Glc	Path2 - Path1	0	0
13	lipid0250	Sitosterol-Glc	Path3 - Path1	0	0
13	lipid0257	Sitosterol-Glc(16:0)	Path2 - Path1	0.000192	1.4e-05
13	lipid0257	Sitosterol-Glc(16:0)	Path3 - Path1	0.001216	0.000116
13	lipid0263	Sitosterol-Glc(18:2)	Path2 - Path1	0.008007	0.001236
13	lipid0260	Sitosterol-Glc(18:3)	Path2 - Path1	0.019496	0.003926
13	lipid0249	Stigmasterol-Glc	Path2 - Path1	0.004958	0.000641
13	lipid0249	Stigmasterol-Glc	Path3 - Path1	0.009409	0.001564
13	lipid0256	Stigmasterol-Glc(16:0)	Path2 - Path1	0.007679	0.001166
13	lipid0256	Stigmasterol-Glc(16:0)	Path3 - Path1	0.009696	0.001637
13	lipid0262	Stigmasterol-Glc(18:2)	Path2 - Path1	0.006414	0.000916
13	lipid0280	TAG(18:2/36:5)	Path2 - Path1	0.006901	0.001009
13	lipid0280	TAG(18:2/36:5)	Path3 - Path1	0.003297	0.000384
13	lipid1062	TAG(18:3/34:6)	Path2 - Path1	0.046218	0.01225
13	lipid0278	TAG(18:3/36:5)	Path2 - Path1	0.02424	0.005169
13	lipid0278	TAG(18:3/36:5)	Path3 - Path1	0.01949	0.003924
16	lipid0473	acMGDG(16:0/34:6)	Path3 - Path1	0.018619	0.003704
16	lipid0473	acMGDG(16:0/34:6)	Path2 - Path1	0.045463	0.011996
16	lipid0474	acMGDG(16:0/34:7-O)	Path3 - Path1	0.02766	0.006143
16	lipid0483	acMGDG(16:0/36:8-2O)	Path3 - Path1	0.025007	0.00538
16	lipid0483	acMGDG(16:0/36:8-2O)	Path2 - Path1	0.02581	0.005606
16	lipid0448	acMGDG(16:3/34:6)	Path2 - Path1	2e-05	1e-06
16	lipid0448	acMGDG(16:3/34:6)	Path3 - Path2	0.030534	0.007026
16	lipid0498	acMGDG(16:3-O/34:8-2O) or acMGDG(16:3-O/36:6)	Path3 - Path1	5e-06	0
16	lipid0498	acMGDG(16:3-O/34:8-2O) or acMGDG(16:3-O/36:6)	Path2 - Path1	0.000633	5.1e-05
16	lipid0500	acMGDG(16:3-O/36:8-2O)	Path3 - Path1	0.000427	3.3e-05
16	lipid0525	acMGDG(16:3-2O/36:8-2O) or acMGDG(18:1/36:8-2O)	Path3 - Path1	5.6e-05	3e-06
16	lipid0525	acMGDG(16:3-2O/36:8-2O) or acMGDG(18:1/36:8-2O)	Path2 - Path1	0.031484	0.007333
16	lipid0526	acMGDG(18:0/34:6)	Path3 - Path1	0.04794	0.01284
16	lipid0519	acMGDG(16:3-2O/34:6) or acMGDG(18:1/34:6)	Path3 - Path1	0	0
16	lipid0519	acMGDG(16:3-2O/34:6) or acMGDG(18:1/34:6)	Path2 - Path1	0.000124	8e-06
16	lipid0514	acMGDG(18:2/34:6)	Path2 - Path1	0.000641	5.2e-05
16	lipid0514	acMGDG(18:2/34:6)	Path3 - Path1	0.001336	0.000132
16	lipid0515	acMGDG(18:2/34:7-O)	Path2 - Path1	8.7e-05	6e-06
16	lipid0515	acMGDG(18:2/34:7-O)	Path3 - Path1	0.001361	0.000135
16	lipid0516	acMGDG(18:2/34:8-2O) or acMGDG(18:2/36:6)	Path2 - Path1	9e-06	0
16	lipid0516	acMGDG(18:2/34:8-2O) or acMGDG(18:2/36:6)	Path3 - Path1	0.009804	0.001666
16	lipid0551	acMGDG(18:2-O/34:8-2O) or acMGDG(18:2-O/36:6)	Path3 - Path1	0.029959	0.006845
16	lipid0553	acMGDG(18:2-O/36:8-2O)	Path3 - Path1	0.004174	0.000513
16	lipid0503	acMGDG(18:3/34:7-O)	Path3 - Path1	0.004266	0.000528
16	lipid0543	acMGDG(18:3-O/34:7-O)	Path3 - Path1	0.008042	0.001244
16	lipid0544	acMGDG(18:3-O/34:8-2O) or acMGDG(18:3-O/36:6)	Path2 - Path1	0	0
16	lipid0544	acMGDG(18:3-O/34:8-2O) or acMGDG(18:3-O/36:6)	Path3 - Path1	0.001733	0.000181
16	lipid0548	acMGDG(18:3-O/36:8-2O)	Path3 - Path1	0.005771	0.000788
16	lipid0548	acMGDG(18:3-O/36:8-2O)	Path2 - Path1	0.030642	0.007061
16	lipid0592	acMGDG(18:3-3O/34:7-O)	Path3 - Path1	0.014085	0.002636
16	lipid0595	acMGDG(18:3-3O/36:8-2O)	Path3 - Path1	0.003739	0.000448
16	lipid0533	acMGDG(18:4-O/34:7-O)	Path3 - Path1	0.035634	0.008646
16	lipid0575	acMGDG(18:4-O/36:7-2O) (alternative fragmentation)	Path3 - Path1	0.028143	0.006287
16	lipid0541	acMGDG(18:4-O/36:6-2O) or acMGDG(18:4-O/38:4)	Path3 - Path1	0.008631	0.001376
16	lipid0560	acMGDG(18:4-2O/34:7-O)	Path3 - Path1	0.008577	0.001364
16	lipid0560	acMGDG(18:4-2O/34:7-O)	Path2 - Path1	0.025355	0.005478
16	lipid0587	acMGDG(18:4-3O/34:7-O)	Path3 - Path1	0.020593	0.004212
16	lipid0558	acMGDG(18:5-2O/36:8-2O)	Path3 - Path1	0.002694	0.000303
16	lipid0558	acMGDG(18:5-2O/36:8-2O)	Path2 - Path1	0.042068	0.010849
16	lipid0361	MGDG(18:4-O/16:4-O) (18:4-O as fragment; Arabidopside A)	Path3 - Path1	0.001374	0.000137
16	lipid0361	MGDG(18:4-O/16:4-O) (18:4-O as fragment; Arabidopside A)	Path2 - Path1	0.027127	0.005986
16	lipid0398	DGDG(18:4-O/18:4-O) (Arabidopside D)	Path3 - Path1	0.047657	0.012742
16	lipid0261	Campesterol-Glc(18:2)	Path2 - Path1	0.000371	2.8e-05
16	lipid0261	Campesterol-Glc(18:2)	Path3 - Path1	0.0041	0.000502
16	lipid0392	DGDG(16:0/18:4-O)	Path3 - Path1	0.001021	9.3e-05
16	lipid0392	DGDG(16:0/18:4-O)	Path2 - Path1	0.028569	0.006416
16	lipid0394	DGDG(18:3-2O/16:3)	Path3 - Path1	0.008516	0.00135
16	lipid0387	DGDG(18:4-O/16:3)	Path3 - Path1	0.003096	0.000357
16	lipid0387	DGDG(18:4-O/16:3)	Path2 - Path1	0.02	0.004056
16	lipid0396	DGDG(18:4-O/18:3)	Path3 - Path1	0.001392	0.000139
16	lipid0396	DGDG(18:4-O/18:3)	Path2 - Path1	0.0136	0.002529
16	lipid0402	DGDG(18:4-O/18:4-2O) or DGDG(18:4-O/20:2)	Path3 - Path1	1.6e-05	1e-06
16	lipid0402	DGDG(18:4-O/18:4-2O) or DGDG(18:4-O/20:2)	Path2 - Path1	0.001484	0.000151
16	lipid0175	DGDG(36:6-2O) or DGDG(38:4)	Path3 - Path1	0.00947	0.001579
16	lipid0160	DGMG(18:4-O)	Path3 - Path1	0	0
16	lipid0160	DGMG(18:4-O)	Path2 - Path1	1e-06	0
16	lipid0817	Stigmasterol-Glc(18:4-O)	Path3 - Path1	2.6e-05	1e-06
16	lipid0817	Stigmasterol-Glc(18:4-O)	Path2 - Path1	7.3e-05	5e-06
16	lipid0837	MGDG(18:3/7:1-O)	Path3 - Path1	0	0
16	lipid0837	MGDG(18:3/7:1-O)	Path2 - Path1	0	0
16	lipid0370	MGDG(18:3-2O/16:3)	Path3 - Path1	0.023216	0.004892
16	lipid0330	MGDG(18:3-2O/16:4-O) or MGDG(20:1/16:4-O) (16:4-O as fragment)	Path3 - Path1	0.005973	0.000827
16	lipid0358	MGDG(18:4-O/16:3)	Path3 - Path1	0.037245	0.009177
16	lipid0366	MGDG(18:4-O/18:1) or MGDG(18:4-O/16:3-2O)	Path3 - Path1	0.004504	0.000566
16	lipid0372	MGDG(18:4-O/18:3)	Path3 - Path1	1.5e-05	1e-06
16	lipid0372	MGDG(18:4-O/18:3)	Path2 - Path1	0.00736	0.0011
16	lipid0376	MGDG(18:4-O/18:3-O)	Path3 - Path1	0.017957	0.003539
16	lipid0382	MGDG(18:4-O/18:3-2O) or MGDG(18:4-O/20:3)	Path3 - Path1	0.005392	0.000717
16	lipid0385	MGDG(18:4-O/18:3-3O)	Path3 - Path1	0.00115	0.000108
16	lipid0386	MGDG(18:4-O/18:3-4O)	Path3 - Path1	0.001826	0.000193
16	lipid0381	MGDG(18:4-O/18:4-2O)	Path3 - Path1	0.001813	0.000191
16	lipid0384	MGDG(18:4-O/18:4-3O) or MGDG(18:4-O/19:3-2O)	Path3 - Path1	0	0
16	lipid0384	MGDG(18:4-O/18:4-3O) or MGDG(18:4-O/19:3-2O)	Path2 - Path1	0.00165	0.000171
16	lipid0329	MGDG(18:4-2O/16:4-O) or MGDG(20:2/16:4-O)	Path3 - Path1	2.6e-05	2e-06
16	lipid0328	MGDG(18:5-2O/16:4-O) or MGDG(20:3/16:4-O)	Path3 - Path1	0.011057	0.001969
16	lipid0380	MGDG(18:5-2O/18:4-O) or MGDG(20:3/18:4-O)	Path3 - Path1	0.026977	0.005942
16	lipid0138	MGDG(30:6-O)	Path3 - Path1	0	0
16	lipid0138	MGDG(30:6-O)	Path2 - Path1	0.000986	8.9e-05
16	lipid0149	MGDG(36:3)	Path3 - Path1	0.032157	0.007553
16	lipid0154	MGDG(36:6-2O) or MGDG(38:4)	Path3 - Path1	0.031631	0.007381
16	lipid0152	MGDG(36:8-2O) or MGDG(38:6)	Path3 - Path1	0.000632	5.1e-05
16	lipid0153	MGDG(36:7-2O) or MGDG(38:5)	Path3 - Path1	0.017315	0.003383
16	lipid0133	MGMG(16:0)	Path3 - Path1	0	0
16	lipid0133	MGMG(16:0)	Path2 - Path1	9.1e-05	6e-06
16	lipid0136	MGMG(18:4-O)	Path3 - Path1	6.6e-05	4e-06
16	lipid0136	MGMG(18:4-O)	Path2 - Path1	0.007376	0.001104
16	lipid1064	NAPE(18:3/34:3)	Path3 - Path1	0.017763	0.003492
16	lipid1065	NAPE(18:3/36:6)	Path3 - Path1	0.000936	8.3e-05
16	lipid1065	NAPE(18:3/36:6)	Path2 - Path1	0.013356	0.002473
16	lipid0125	PA(34:2)	Path3 - Path1	0.000842	7.3e-05
16	lipid0124	PA(34:3)	Path3 - Path1	0.002918	0.000333
16	lipid0124	PA(34:3)	Path2 - Path1	0.036089	0.008794
16	lipid0131	PA(36:2)	Path3 - Path1	0.000293	2.1e-05
16	lipid0131	PA(36:2)	Path2 - Path1	0.048931	0.013184
16	lipid0130	PA(36:3)	Path3 - Path1	0.00984	0.001675
16	lipid0371	PC(16:0/18:3-2O)	Path3 - Path1	0.038664	0.00966
16	lipid0378	PC(18:3/18:3-2O)	Path3 - Path1	0.00635	0.000903
16	lipid0030	PC(32:0)	Path2 - Path1	0	0
16	lipid0030	PC(32:0)	Path3 - Path1	7e-06	0
16	lipid0840	PC(32:3)	Path2 - Path1	0.049393	0.013346
16	lipid0842	PC(34:6)	Path2 - Path1	0.023979	0.005097
16	lipid0355	PE(16:0/18:3-2O)	Path3 - Path1	0.030731	0.007089
16	lipid0360	PE(18:2/18:3-2O)	Path3 - Path1	0.016615	0.003215
16	lipid0427	PE(16:0/18:2-O)	Path3 - Path1	0.005381	0.000716
16	lipid0359	PE(18:3/18:3-2O)	Path3 - Path1	0.004339	0.000539
16	lipid0057	PE(32:3)	Path2 - Path1	1e-06	0
16	lipid0057	PE(32:3)	Path3 - Path1	0.000761	6.4e-05
16	lipid0431	PG(18:2-O/16:1)	Path3 - Path1	0.028399	0.006364
16	lipid0621	PG(18:3-O/16:1)	Path3 - Path1	0.040514	0.010308
16	lipid0357	PG(18:4-O/16:0)	Path3 - Path1	0.000407	3.1e-05
16	lipid0357	PG(18:4-O/16:0)	Path2 - Path1	0.018238	0.003609
16	lipid0356	PG(18:4-O/16:1)	Path3 - Path1	0.005712	0.000777
16	lipid0356	PG(18:4-O/16:1)	Path2 - Path1	0.040439	0.010281
16	lipid0364	PG(18:4-O/18:2)	Path3 - Path1	0.001922	0.000205
16	lipid0116	PS(42:2)	Path3 - Path1	0.041941	0.010804
16	lipid0263	Sitosterol-Glc(18:2)	Path2 - Path1	0.019019	0.003804
16	lipid0263	Sitosterol-Glc(18:2)	Path3 - Path1	0.042274	0.010921
16	lipid0260	Sitosterol-Glc(18:3)	Path2 - Path1	0.00568	0.000771
16	lipid0260	Sitosterol-Glc(18:3)	Path3 - Path1	0.041896	0.010788
16	lipid1061	SQDG(34:4-O)	Path3 - Path1	0.000667	5.5e-05
16	lipid1061	SQDG(34:4-O)	Path2 - Path1	0.009516	0.001591
16	lipid1063	SQDG(36:8-2O)	Path3 - Path1	0.012775	0.002342
16	lipid0262	Stigmasterol-Glc(18:2)	Path2 - Path1	0.012838	0.002356
16	lipid0262	Stigmasterol-Glc(18:2)	Path3 - Path1	0.009663	0.001629
16	lipid0259	Stigmasterol-Glc(18:3)	Path2 - Path1	0.030985	0.007171
16	lipid0280	TAG(18:2/36:5)	Path2 - Path1	0.008928	0.001446
16	lipid0280	TAG(18:2/36:5)	Path3 - Path1	0.005728	0.00078
16	lipid1062	TAG(18:3/34:6)	Path2 - Path1	0.01823	0.003607
16	lipid0278	TAG(18:3/36:5)	Path2 - Path1	0.010408	0.00182
16	lipid0278	TAG(18:3/36:5)	Path3 - Path1	0.00884	0.001425
16	lipid0277	TAG(18:3/36:6)	Path2 - Path1	0.013303	0.002461
16	lipid0277	TAG(18:3/36:6)	Path3 - Path1	0.017476	0.003422
16	lipid0294	TrGDG(34:6)	Path2 - Path1	2.1e-05	1e-06
16	lipid0294	TrGDG(34:6)	Path3 - Path1	0.00099	8.9e-05
17	lipid0599	acDGDG(18:4-O/34:6)	Path2 - Path1	0.038559	0.009623
17	lipid0212	GIPC(42:2)-3	Path2 - Path1	0.010148	0.001758
17	lipid0799	LPA(16:0)	Path3 - Path1	0.002254	0.000246
17	lipid0141	MGDG(34:5)	Path2 - Path1	0.042894	0.011139
17	lipid0030	PC(32:0)	Path2 - Path1	0.001225	0.000117
17	lipid0017	PG(36:3)	Path2 - Path1	0.040265	0.010219
17	lipid1062	TAG(18:3/34:6)	Path2 - Path1	0.029362	0.006659
17	lipid0277	TAG(18:3/36:6)	Path3 - Path1	0.039056	0.009795
40	lipid0476	acMGDG(16:0/34:8-2O) or acMGDG(16:0/36:6)	Path2 - Path1	0.039632	0.009996
40	lipid0448	acMGDG(16:3/34:6)	Path2 - Path1	0.004047	0.000494
40	lipid0544	acMGDG(18:3-O/34:8-2O) or acMGDG(18:3-O/36:6)	Path2 - Path1	0.037542	0.009277
40	lipid0535	acMGDG(18:4-O/34:8-2O) (Arabidopside E) or acMGDG(18:4-O/36:6)	Path2 - Path1	0.045035	0.011853
40	lipid0255	Campesterol-Glc(16:0)	Path2 - Path1	0.012416	0.002262
40	lipid0255	Campesterol-Glc(16:0)	Path3 - Path2	0.000494	3.9e-05
40	lipid0168	DGDG(36:5)	Path2 - Path1	0.002451	0.000271
40	lipid0168	DGDG(36:5)	Path3 - Path1	0.008351	0.001312
40	lipid0158	DGMG(16:4-O)	Path2 - Path1	0.04414	0.011556
40	lipid0055	LPE(18:1)	Path3 - Path1	0.005562	0.000749
40	lipid0055	LPE(18:1)	Path2 - Path1	0.009595	0.001611
40	lipid0143	MGDG(34:3)	Path2 - Path1	0.007899	0.001213
40	lipid0143	MGDG(34:3)	Path3 - Path1	0.010956	0.001946
40	lipid0149	MGDG(36:3)	Path3 - Path1	7e-06	0
40	lipid0149	MGDG(36:3)	Path2 - Path1	3.1e-05	2e-06
40	lipid0148	MGDG(36:4) or MGDG(34:6-2O)	Path3 - Path1	0	0
40	lipid0148	MGDG(36:4) or MGDG(34:6-2O)	Path2 - Path1	1e-06	0
40	lipid0147	MGDG(36:5) or MGDG(34:7-2O)	Path3 - Path1	0	0
40	lipid0147	MGDG(36:5) or MGDG(34:7-2O)	Path2 - Path1	0	0
40	lipid0133	MGMG(16:0)	Path2 - Path1	0.035288	0.008534
40	lipid0132	MGMG(16:3)	Path2 - Path1	0.03088	0.007137
40	lipid0132	MGMG(16:3)	Path3 - Path1	0.034628	0.008322
40	lipid0135	MGMG(18:3)	Path2 - Path1	0.010125	0.001752
40	lipid0135	MGMG(18:3)	Path3 - Path1	0.004791	0.000613
40	lipid0136	MGMG(18:4-O)	Path2 - Path1	0.026496	0.005802
40	lipid0123	PA(34:4)	Path2 - Path1	0.005897	0.000812
40	lipid0123	PA(34:4)	Path3 - Path1	0.034146	0.008169
40	lipid0121	PA(34:6)	Path2 - Path1	1e-06	0
40	lipid0121	PA(34:6)	Path3 - Path1	0.000193	1.4e-05
40	lipid0131	PA(36:2)	Path2 - Path1	0.007581	0.001146
40	lipid0130	PA(36:3)	Path2 - Path1	0.028658	0.006443
40	lipid0030	PC(32:0)	Path2 - Path1	0.033811	0.008064
40	lipid0841	PC(32:1)	Path2 - Path1	0.009964	0.001708
40	lipid0841	PC(32:1)	Path3 - Path1	0.01993	0.004038
40	lipid0840	PC(32:3)	Path2 - Path1	0	0
40	lipid0840	PC(32:3)	Path3 - Path1	0.010537	0.001851
40	lipid0035	PC(34:1)	Path3 - Path1	0.010092	0.001742
40	lipid0035	PC(34:1)	Path2 - Path1	0.020542	0.004198
40	lipid0033	PC(34:3)	Path2 - Path1	0.043179	0.01124
40	lipid0842	PC(34:6)	Path2 - Path1	0	0
40	lipid0842	PC(34:6)	Path3 - Path1	0.022643	0.00474
40	lipid0842	PC(34:6)	Path3 - Path2	0.048987	0.013204
40	lipid0046	PC(38:2)	Path2 - Path1	0.02361	0.004998
40	lipid0050	PC(40:2)	Path2 - Path1	0.000105	7e-06
40	lipid0050	PC(40:2)	Path3 - Path1	0.014438	0.002714
40	lipid0049	PC(40:3)	Path2 - Path1	0.025707	0.005577
40	lipid0059	PE(32:1)	Path2 - Path1	0.004961	0.000642
40	lipid0057	PE(32:3)	Path2 - Path1	0	0
40	lipid0057	PE(32:3)	Path3 - Path1	2e-06	0
40	lipid0057	PE(32:3)	Path3 - Path2	0.000666	5.5e-05
40	lipid0353	PG(18:2/16:0-O)	Path3 - Path1	0.00615	0.000862
40	lipid0007	PG(32:1)	Path2 - Path1	0.003876	0.000468
40	lipid0257	Sitosterol-Glc(16:0)	Path2 - Path1	0.001419	0.000143
40	lipid0257	Sitosterol-Glc(16:0)	Path3 - Path2	9e-06	0
40	lipid0305	TeGDG(34:6)	Path2 - Path1	0.031812	0.00744

## Sheet: Table S7
Table S7. Unsaturation indices of normal chain lipids in classes of diacyl lipid molecular species. Unsaturation index is the average number of double bonds per fatty acid chain in the indicated lipid class. Lipid molecular species that contained oxidized acyl chains were not included in the calculation of unsaturation indices. Data from biological replicates of each treatment are shown for wild-…
					Unsaturation index (number of double bonds per fatty acyl chain)
Sample name ("H" for "heat"+Block number.Tray number.Well number in tray)	Tray number	Treatment	Path(s)	Genotype	DGDG	MGDG	PA	PC	PE	PG	PS	TAG
H1.01.09	1	21° C	1, 2, and 3	WT	2.77218	2.91116	1.54181	1.81152	1.69348	1.55509	1.2711	2.44444
H1.01.22	1	21° C	1, 2, and 3	WT	2.77002	2.91	1.54232	1.85452	1.69823	1.5622	1.26858	2.54309
H1.01.23	1	21° C	1, 2, and 3	WT	2.76596	2.90374	1.51308	1.85067	1.706	1.54022	1.27139	2.54039
H1.01.28	1	21° C	1, 2, and 3	WT	2.75719	2.90685	1.52506	1.84455	1.68961	1.54677	1.26922	2.53083
H1.01.54	1	21° C	1, 2, and 3	WT	2.75033	2.90278	1.62428	1.8352	1.68182	1.5336	1.26752	2.53803
H1.01.71	1	21° C	1, 2, and 3	WT	2.74278	2.89251	1.60052	1.81741	1.66248	1.51468	1.25384	2.53418
H2.01.08	1	21° C	1, 2, and 3	WT	2.72566	2.89507	1.54755	1.81314	1.65355	1.52503	1.25814	2.52598
H2.01.14	1	21° C	1, 2, and 3	WT	2.7319	2.88987	1.49702	1.81013	1.65565	1.51542	1.25445	2.53028
H2.01.51	1	21° C	1, 2, and 3	WT	2.73007	2.89022	1.53578	1.81812	1.65524	1.51054	1.25409	2.5336
H2.01.53	1	21° C	1, 2, and 3	WT	2.72255	2.89247	1.53891	1.81265	1.66143	1.50715	1.25798	2.53104
H2.01.71	1	21° C	1, 2, and 3	WT	2.72655	2.8833	1.56128	1.80522	1.64683	1.50243	1.24851	2.51775
H3.01.01	1	21° C	1, 2, and 3	WT	2.72596	2.89465	1.6004	1.80851	1.66907	1.53994	1.24642	2.52732
H3.01.05	1	21° C	1, 2, and 3	WT	2.72634	2.89496	1.60128	1.81595	1.67564	1.5294	1.24942	2.53625
H3.01.28	1	21° C	1, 2, and 3	WT	2.73182	2.89434	1.58277	1.82438	1.6742	1.52988	1.2519	2.54534
H3.01.29	1	21° C	1, 2, and 3	WT	2.73027	2.89395	1.59616	1.80904	1.66694	1.52931	1.24677	2.53097
H3.01.34	1	21° C	1, 2, and 3	WT	2.72976	2.89857	1.59814	1.82965	1.68415	1.5322	1.25549	2.55029
H3.01.45	1	21° C	1, 2, and 3	WT	2.73281	2.90099	1.61945	1.82935	1.67789	1.53209	1.25201	2.54585
H1.02.09	2	1 h at 21°C	1 and 3	WT	2.74784	2.92648	1.60509	1.85553	1.63998	1.52063	1.27761	2.53367
H1.02.22	2	1 h at 21°C	1 and 3	WT	2.74223	2.92131	1.56835	1.84998	1.63267	1.52829	1.26436	2.51148
H1.02.23	2	1 h at 21°C	1 and 3	WT	2.75118	2.92618	1.6498	1.85313	1.63741	1.51197	1.27307	2.52965
H1.02.28	2	1 h at 21°C	1 and 3	WT	2.75382	2.92645	1.56494	1.86344	1.63883	1.50452	1.28337	2.52193
H1.02.54	2	1 h at 21°C	1 and 3	WT	2.7532	2.92874	1.60636	1.8613	1.64	1.51545	1.28157	2.52456
H1.02.71	2	1 h at 21°C	1 and 3	WT	2.74234	2.92274	1.65013	1.85269	1.63155	1.53505	1.26357	2.51206
H2.02.08	2	1 h at 21°C	1 and 3	WT	2.72603	2.88485	1.41842	1.8032	1.6575	1.49667	1.24985	2.52634
H2.02.14	2	1 h at 21°C	1 and 3	WT	2.7284	2.88114	1.41856	1.80218	1.65314	1.49758	1.24805	2.52476
H2.02.24	2	1 h at 21°C	1 and 3	WT	2.72814	2.87962	1.52212	1.80324	1.64982	1.48719	1.24911	2.52451
H2.02.51	2	1 h at 21°C	1 and 3	WT	2.7317	2.88444	1.56709	1.80006	1.63978	1.5071	1.24787	2.53416
H2.02.53	2	1 h at 21°C	1 and 3	WT	2.72859	2.8834	1.56863	1.80056	1.64404	1.50221	1.24962	2.53587
H2.02.71	2	1 h at 21°C	1 and 3	WT	2.71893	2.89187	1.59284	1.80359	1.63443	1.51701	1.24889	2.53765
H3.02.01	2	1 h at 21°C	1 and 3	WT	2.73339	2.89931	1.60598	1.81762	1.66553	1.53134	1.24636	2.54623
H3.02.05	2	1 h at 21°C	1 and 3	WT	2.72779	2.89537	1.62162	1.80901	1.6713	1.51767	1.24456	2.53068
H3.02.28	2	1 h at 21°C	1 and 3	WT	2.73221	2.89661	1.56377	1.81815	1.66794	1.50368	1.25047	2.54279
H3.02.29	2	1 h at 21°C	1 and 3	WT	2.73858	2.89193	1.58193	1.81752	1.67727	1.49648	1.25269	2.48691
H3.02.34	2	1 h at 21°C	1 and 3	WT	2.73589	2.89426	1.60643	1.8169	1.67964	1.50945	1.25078	2.53721
H3.02.45	2	1 h at 21°C	1 and 3	WT	2.74165	2.90127	1.62093	1.82631	1.67078	1.53078	1.25494	2.55109
H1.03.09	3	1 h at 38°C	2	WT	2.73621	2.90292	1.5724	1.8143	1.63902	1.49865	1.2647	2.53179
H1.03.22	3	1 h at 38°C	2	WT	2.73835	2.90693	1.53574	1.81963	1.63678	1.51912	1.26616	2.5275
H1.03.23	3	1 h at 38°C	2	WT	2.74597	2.90467	1.57263	1.80531	1.6366	1.49957	1.26512	2.52906
H1.03.28	3	1 h at 38°C	2	WT	2.73706	2.90652	1.52866	1.81152	1.63772	1.50097	1.26629	2.53139
H1.03.54	3	1 h at 38°C	2	WT	2.73065	2.90986	1.61689	1.81906	1.6295	1.51736	1.26532	2.53702
H1.03.71	3	1 h at 38°C	2	WT	2.7405	2.90743	1.56269	1.82914	1.63503	1.51472	1.26438	2.54353
H2.03.08	3	1 h at 38°C	2	WT	2.75098	2.91039	1.45719	1.82029	1.65204	1.53715	1.27112	2.52876
H2.03.14	3	1 h at 38°C	2	WT	2.74076	2.9059	1.50569	1.811	1.6434	1.5295	1.2683	2.52045
H2.03.24	3	1 h at 38°C	2	WT	2.75776	2.90697	1.50584	1.82984	1.64998	1.53361	1.26831	2.5367
H2.03.51	3	1 h at 38°C	2	WT	2.73977	2.91145	1.49058	1.81836	1.65122	1.53727	1.26808	2.52945
H2.03.53	3	1 h at 38°C	2	WT	2.7437	2.90743	1.47033	1.81109	1.64709	1.52146	1.26724	2.52657
H2.03.71	3	1 h at 38°C	2	WT	2.73564	2.90463	1.4621	1.80407	1.62981	1.53284	1.26051	2.51865
H3.03.01	3	1 h at 38°C	2	WT	2.71508	2.89955	1.56876	1.78937	1.61462	1.53203	1.24473	2.50559
H3.03.05	3	1 h at 38°C	2	WT	2.7208	2.90234	1.55381	1.79066	1.62514	1.52595	1.24829	2.5172
H3.03.28	3	1 h at 38°C	2	WT	2.71812	2.89535	1.58105	1.78526	1.62073	1.50842	1.24672	2.52131
H3.03.29	3	1 h at 38°C	2	WT	2.72506	2.89583	1.54155	1.77572	1.60536	1.51766	1.2389	2.51433
H3.03.34	3	1 h at 38°C	2	WT	2.72347	2.8932	1.56923	1.79093	1.62525	1.49342	1.24757	2.52995
H3.03.45	3	1 h at 38°C	2	WT	2.73501	2.89522	1.5219	1.78437	1.6078	1.5133	1.24208	2.5254
H1.04.09	4	12 h at 21°C	1 and 3	WT	2.7323	2.92649	1.54052	1.88703	1.65904	1.54415	1.25629	2.58789
H1.04.22	4	12 h at 21°C	1 and 3	WT	2.7306	2.92399	1.50298	1.88392	1.65464	1.5424	1.24738	2.5787
H1.04.23	4	12 h at 21°C	1 and 3	WT	2.71879	2.91641	1.53136	1.86971	1.64398	1.52691	1.24637	2.58722
H1.04.28	4	12 h at 21°C	1 and 3	WT	2.74016	2.93046	1.53238	1.90205	1.67159	1.57025	1.25782	2.59687
H1.04.54	4	12 h at 21°C	1 and 3	WT	2.73553	2.92677	1.60557	1.88225	1.66315	1.56434	1.24834	2.59021
H1.04.71	4	12 h at 21°C	1 and 3	WT	2.73281	2.92368	1.63605	1.88607	1.65238	1.53975	1.25435	2.59955
H2.04.08	4	12 h at 21°C	1 and 3	WT	2.76192	2.94392	1.57713	1.94271	1.71056	1.58277	1.27948	2.61741
H2.04.14	4	12 h at 21°C	1 and 3	WT	2.74931	2.93698	1.50399	1.92649	1.69701	1.57655	1.27122	2.61861
H2.04.24	4	12 h at 21°C	1 and 3	WT	2.77157	2.93944	1.54378	1.9242	1.68873	1.58816	1.26061	2.60531
H2.04.51	4	12 h at 21°C	1 and 3	WT	2.75722	2.93776	1.53125	1.90874	1.67813	1.57427	1.26286	2.606
H2.04.53	4	12 h at 21°C	1 and 3	WT	2.76361	2.93847	1.53648	1.91155	1.68277	1.57279	1.2706	2.60994
H2.04.71	4	12 h at 21°C	1 and 3	WT	2.74991	2.93496	1.5473	1.90556	1.6628	1.5918	1.25957	2.60533
H3.04.01	4	12 h at 21°C	1 and 3	WT	2.73957	2.93918	1.61929	1.91223	1.6973	1.60573	1.26164	2.61317
H3.04.05	4	12 h at 21°C	1 and 3	WT	2.73589	2.93652	1.60051	1.90066	1.69919	1.59699	1.26558	2.59396
H3.04.28	4	12 h at 21°C	1 and 3	WT	2.74268	2.94143	1.63342	1.91237	1.70886	1.60128	1.26817	2.62265
H3.04.29	4	12 h at 21°C	1 and 3	WT	2.73415	2.93735	1.60496	1.90453	1.70024	1.59529	1.26106	2.60605
H3.04.34	4	12 h at 21°C	1 and 3	WT	2.73807	2.93772	1.62722	1.90951	1.69968	1.59071	1.26277	2.61334
H3.04.45	4	12 h at 21°C	1 and 3	WT	2.73779	2.93864	1.66585	1.90221	1.69651	1.5991	1.26281	2.59962
H1.05.09	5	12 h at 38°C	2	WT	2.73516	2.91441	1.52925	1.73315	1.5974	1.44532	1.28588	2.64829
H1.05.22	5	12 h at 38°C	2	WT	2.74329	2.91835	1.51973	1.73901	1.60899	1.45508	1.29055	2.64366
H1.05.23	5	12 h at 38°C	2	WT	2.74419	2.9182	1.51808	1.74263	1.61542	1.45654	1.28779	2.65741
H1.05.28	5	12 h at 38°C	2	WT	2.72853	2.91677	1.47279	1.73833	1.59512	1.46277	1.28991	2.64841
H1.05.54	5	12 h at 38°C	2	WT	2.74307	2.92013	1.53518	1.7338	1.60028	1.4552	1.28835	2.66703
H1.05.71	5	12 h at 38°C	2	WT	2.74697	2.91598	1.54723	1.72006	1.58986	1.47292	1.28404	2.67274
H2.05.08	5	12 h at 38°C	2	WT	2.75516	2.93914	1.48886	1.87817	1.62033	1.56612	1.25819	2.61502
H2.05.14	5	12 h at 38°C	2	WT	2.75691	2.94641	1.47889	1.90161	1.63318	1.57966	1.26835	2.62859
H2.05.24	5	12 h at 38°C	2	WT	2.75592	2.94133	1.47204	1.90701	1.62776	1.56376	1.26267	2.62408
H2.05.51	5	12 h at 38°C	2	WT	2.75095	2.94528	1.50237	1.89284	1.62629	1.57159	1.26937	2.6217
H2.05.53	5	12 h at 38°C	2	WT	2.75521	2.94451	1.52733	1.90662	1.63246	1.5716	1.27	2.63476
H2.05.71	5	12 h at 38°C	2	WT	2.76027	2.94434	1.53065	1.89893	1.63981	1.55897	1.27534	2.63987
H3.05.01	5	12 h at 38°C	2	WT	2.73134	2.91777	1.57052	1.84687	1.6282	1.5665	1.24697	2.60493
H3.05.05	5	12 h at 38°C	2	WT	2.72982	2.91958	1.58867	1.84928	1.63861	1.57313	1.25127	2.61378
H3.05.28	5	12 h at 38°C	2	WT	2.72957	2.91927	1.56697	1.84654	1.63927	1.56787	1.25191	2.61993
H3.05.29	5	12 h at 38°C	2	WT	2.73512	2.92106	1.5883	1.85684	1.63061	1.56855	1.24588	2.60807
H3.05.34	5	12 h at 38°C	2	WT	2.72965	2.92574	1.54833	1.85743	1.63873	1.57076	1.25216	2.6159
H3.05.45	5	12 h at 38°C	2	WT	2.72923	2.92589	1.61178	1.85451	1.63094	1.57454	1.24869	2.59934
H1.06.09	6	13 h at 21°C	1	WT	2.73443	2.9307	1.57436	1.84706	1.63873	1.52464	1.28203	2.55289
H1.06.22	6	13 h at 21°C	1	WT	2.73453	2.93172	1.56621	1.84725	1.62832	1.53685	1.27938	2.53841
H1.06.23	6	13 h at 21°C	1	WT	2.73176	2.93049	1.56711	1.85012	1.62881	1.52782	1.28252	2.54268
H1.06.28	6	13 h at 21°C	1	WT	2.72245	2.92668	1.54252	1.85582	1.64424	1.52891	1.29226	2.58468
H1.06.54	6	13 h at 21°C	1	WT	2.73098	2.93048	1.60586	1.84992	1.6363	1.53297	1.28593	2.54444
H1.06.71	6	13 h at 21°C	1	WT	2.74237	2.92997	1.57746	1.86388	1.64989	1.51965	1.28521	2.56141
H2.06.08	6	13 h at 21°C	1	WT	2.72054	2.92743	1.57707	1.85378	1.65454	1.56621	1.2675	2.58142
H2.06.14	6	13 h at 21°C	1	WT	2.7423	2.93221	1.56994	1.87861	1.67827	1.54522	1.27777	2.6136
H2.06.24	6	13 h at 21°C	1	WT	2.75203	2.92689	1.58608	1.88473	1.68782	1.53247	1.27807	2.59611
H2.06.51	6	13 h at 21°C	1	WT	2.73731	2.93124	1.5697	1.87668	1.67661	1.5632	1.27562	2.60357
H2.06.53	6	13 h at 21°C	1	WT	2.7369	2.92783	1.56323	1.86341	1.6731	1.56076	1.27019	2.59576
H2.06.71	6	13 h at 21°C	1	WT	2.74935	2.93422	1.56863	1.90303	1.69629	1.56315	1.28183	2.62587
H3.06.01	6	13 h at 21°C	1	WT	2.72915	2.92533	1.60739	1.86553	1.66515	1.56972	1.24912	2.59214
H3.06.05	6	13 h at 21°C	1	WT	2.7261	2.92891	1.60638	1.86874	1.67298	1.57901	1.25309	2.59905
H3.06.28	6	13 h at 21°C	1	WT	2.72723	2.92519	1.60799	1.85859	1.66132	1.57506	1.24653	2.58231
H3.06.29	6	13 h at 21°C	1	WT	2.73628	2.92889	1.61074	1.87071	1.67021	1.54833	1.25523	2.60848
H3.06.34	6	13 h at 21°C	1	WT	2.73579	2.92408	1.62769	1.8641	1.65793	1.57051	1.24628	2.60402
H3.06.45	6	13 h at 21°C	1	WT	2.73413	2.92781	1.66089	1.87088	1.67501	1.55924	1.2634	2.61213
H1.07.09	7	12 h at 21°C, 1 h at 45°C	3	WT	2.73915	2.93281	1.5076	1.80956	1.60548	1.53846	1.27443	2.55264
H1.07.22	7	12 h at 21°C, 1 h at 45°C	3	WT	2.74348	2.93402	1.50951	1.82938	1.61839	1.5394	1.2651	2.58283
H1.07.23	7	12 h at 21°C, 1 h at 45°C	3	WT	2.73757	2.93305	1.5717	1.82137	1.61507	1.53027	1.27149	2.57956
H1.07.28	7	12 h at 21°C, 1 h at 45°C	3	WT	2.75108	2.94234	1.54003	1.82682	1.6125	1.55854	1.28073	2.57799
H1.07.54	7	12 h at 21°C, 1 h at 45°C	3	WT	2.74458	2.93778	1.48467	1.80971	1.61274	1.53599	1.2814	2.57421
H1.07.71	7	12 h at 21°C, 1 h at 45°C	3	WT	2.74462	2.93897	1.53366	1.80882	1.60154	1.5629	1.26412	2.58409
H2.07.08	7	12 h at 21°C, 1 h at 45°C	3	WT	2.74899	2.93202	1.52665	1.87634	1.63849	1.58793	1.27741	2.60814
H2.07.14	7	12 h at 21°C, 1 h at 45°C	3	WT	2.75031	2.93175	1.53733	1.86477	1.63447	1.59041	1.27539	2.60356
H2.07.24	7	12 h at 21°C, 1 h at 45°C	3	WT	2.75599	2.93068	1.52844	1.87323	1.63418	1.58923	1.27197	2.60668
H2.07.51	7	12 h at 21°C, 1 h at 45°C	3	WT	2.74826	2.93273	1.5137	1.86567	1.63653	1.59105	1.27293	2.61467
H2.07.53	7	12 h at 21°C, 1 h at 45°C	3	WT	2.75031	2.93391	1.56656	1.87223	1.64897	1.5836	1.27833	2.61903
H2.07.71	7	12 h at 21°C, 1 h at 45°C	3	WT	2.76312	2.93506	1.54202	1.87611	1.63539	1.60162	1.27378	2.61186
H3.07.01	7	12 h at 21°C, 1 h at 45°C	3	WT	2.72295	2.92406	1.63442	1.85561	1.6181	1.57847	1.25727	2.59531
H3.07.05	7	12 h at 21°C, 1 h at 45°C	3	WT	2.72312	2.92537	1.59715	1.85084	1.61525	1.58259	1.25517	2.59891
H3.07.28	7	12 h at 21°C, 1 h at 45°C	3	WT	2.72746	2.92484	1.55973	1.84969	1.60923	1.57978	1.24625	2.60246
H3.07.29	7	12 h at 21°C, 1 h at 45°C	3	WT	2.72751	2.92576	1.58915	1.85709	1.60832	1.58637	1.25798	2.60748
H3.07.34	7	12 h at 21°C, 1 h at 45°C	3	WT	2.72958	2.91915	1.60135	1.84178	1.59844	1.56074	1.25089	2.5982
H3.07.45	7	12 h at 21°C, 1 h at 45°C	3	WT	2.72457	2.92228	1.58616	1.84439	1.60682	1.57839	1.25453	2.60645
H1.08.09	8	12 h at 38°C, 1 h at 45°C	2	WT	2.73722	2.93554	1.51267	1.78185	1.58689	1.52993	1.26175	2.6048
H1.08.22	8	12 h at 38°C, 1 h at 45°C	2	WT	2.73834	2.93431	1.51249	1.79309	1.59697	1.52453	1.27006	2.60599
H1.08.23	8	12 h at 38°C, 1 h at 45°C	2	WT	2.74003	2.93751	1.56344	1.78485	1.58581	1.54719	1.26572	2.60382
H1.08.28	8	12 h at 38°C, 1 h at 45°C	2	WT	2.74064	2.94279	1.52701	1.79665	1.60294	1.56233	1.26888	2.6177
H1.08.54	8	12 h at 38°C, 1 h at 45°C	2	WT	2.737	2.93723	1.51578	1.77803	1.59751	1.54021	1.26787	2.61304
H1.08.71	8	12 h at 38°C, 1 h at 45°C	2	WT	2.74115	2.9362	1.53748	1.76472	1.59489	1.53433	1.26772	2.6122
H2.08.08	8	12 h at 38°C, 1 h at 45°C	2	WT	2.72389	2.93701	1.54811	1.82708	1.61647	1.55459	1.26261	2.61474
H2.08.14	8	12 h at 38°C, 1 h at 45°C	2	WT	2.73844	2.93997	1.52043	1.84152	1.62313	1.55938	1.26917	2.62813
H2.08.24	8	12 h at 38°C, 1 h at 45°C	2	WT	2.73004	2.93576	1.58504	1.8293	1.61398	1.54613	1.26549	2.61561
H2.08.51	8	12 h at 38°C, 1 h at 45°C	2	WT	2.73217	2.93788	1.55795	1.83731	1.62568	1.55448	1.26834	2.62445
H2.08.53	8	12 h at 38°C, 1 h at 45°C	2	WT	2.73645	2.94134	1.55292	1.83096	1.62068	1.56228	1.26564	2.6245
H2.08.71	8	12 h at 38°C, 1 h at 45°C	2	WT	2.72797	2.9354	1.54191	1.8098	1.61501	1.53449	1.26001	2.6252
H3.08.01	8	12 h at 38°C, 1 h at 45°C	2	WT	2.73182	2.93783	1.57626	1.87249	1.62115	1.58146	1.26234	2.61181
H3.08.05	8	12 h at 38°C, 1 h at 45°C	2	WT	2.73746	2.92977	1.59463	1.85968	1.62119	1.54343	1.2586	2.60774
H3.08.28	8	12 h at 38°C, 1 h at 45°C	2	WT	2.73327	2.94151	1.57503	1.87819	1.61405	1.57549	1.25916	2.59592
H3.08.29	8	12 h at 38°C, 1 h at 45°C	2	WT	2.7391	2.94304	1.58565	1.88935	1.61517	1.57809	1.26152	2.598
H3.08.34	8	12 h at 38°C, 1 h at 45°C	2	WT	2.7351	2.93348	1.5893	1.87043	1.61015	1.56868	1.25244	2.59924
H3.08.45	8	12 h at 38°C, 1 h at 45°C	2	WT	2.73157	2.93341	1.59238	1.86133	1.61217	1.56322	1.25732	2.59845
H1.09.09	9	16 h at 21°C	1	WT	2.74067	2.92507	1.56164	1.83612	1.63123	1.51741	1.28861	2.54641
H1.09.22	9	16 h at 21°C	1	WT	2.73407	2.92659	1.62131	1.84401	1.64535	1.50217	1.29047	2.54239
H1.09.23	9	16 h at 21°C	1	WT	2.73648	2.92578	1.61626	1.83401	1.63246	1.52872	1.28507	2.54715
H1.09.28	9	16 h at 21°C	1	WT	2.74508	2.92585	1.59177	1.82359	1.63245	1.52056	1.27583	2.54881
H1.09.54	9	16 h at 21°C	1	WT	2.74168	2.92547	1.67541	1.8283	1.63046	1.50557	1.28412	2.51625
H1.09.71	9	16 h at 21°C	1	WT	2.74208	2.92393	1.61067	1.81566	1.62155	1.51608	1.28137	2.52
H2.09.08	9	16 h at 21°C	1	WT	2.74452	2.92135	1.63478	1.82902	1.66685	1.53658	1.27268	2.57559
H2.09.14	9	16 h at 21°C	1	WT	2.73422	2.92135	1.61258	1.8273	1.66976	1.55505	1.26642	2.57668
H2.09.24	9	16 h at 21°C	1	WT	2.75501	2.92289	1.5957	1.84221	1.69804	1.55393	1.27095	2.6058
H2.09.51	9	16 h at 21°C	1	WT	2.73853	2.92066	1.59316	1.8353	1.68529	1.54206	1.27542	2.59598
H2.09.53	9	16 h at 21°C	1	WT	2.74037	2.91635	1.56154	1.81853	1.6748	1.53739	1.26656	2.59636
H3.09.01	9	16 h at 21°C	1	WT	2.72242	2.92349	1.63211	1.83558	1.67486	1.5796	1.2621	2.56646
H3.09.05	9	16 h at 21°C	1	WT	2.72354	2.91993	1.60814	1.82335	1.67858	1.5771	1.26018	2.55489
H3.09.28	9	16 h at 21°C	1	WT	2.72638	2.92112	1.62122	1.82887	1.66822	1.56081	1.25844	2.56967
H3.09.29	9	16 h at 21°C	1	WT	2.73694	2.92217	1.58678	1.8442	1.68217	1.58237	1.26315	2.5723
H3.09.34	9	16 h at 21°C	1	WT	2.73186	2.9207	1.66779	1.83452	1.68609	1.57532	1.26475	2.57383
H3.09.45	9	16 h at 21°C	1	WT	2.72227	2.91623	1.56948	1.82434	1.68473	1.56952	1.26147	2.54898
H1.10.09	10	12 h at 21°C, 4 h at 45°C	3	WT	2.73984	2.9205	1.55409	1.75487	1.61046	1.56181	1.27329	2.64942
H1.10.22	10	12 h at 21°C, 4 h at 45°C	3	WT	2.74467	2.91381	1.53394	1.75306	1.59924	1.54071	1.26155	2.64471
H1.10.23	10	12 h at 21°C, 4 h at 45°C	3	WT	2.7262	2.91063	1.54596	1.73648	1.59482	1.52647	1.2605	2.63835
H1.10.28	10	12 h at 21°C, 4 h at 45°C	3	WT	2.73401	2.91861	1.51516	1.75482	1.6028	1.56696	1.26318	2.64369
H1.10.54	10	12 h at 21°C, 4 h at 45°C	3	WT	2.74633	2.91448	1.58619	1.77614	1.61334	1.56385	1.27379	2.65872
H1.10.71	10	12 h at 21°C, 4 h at 45°C	3	WT	2.74041	2.91645	1.5958	1.75535	1.60584	1.57237	1.26947	2.64685
H2.10.08	10	12 h at 21°C, 4 h at 45°C	3	WT	2.71893	2.90104	1.50399	1.68843	1.57483	1.5539	1.25739	2.62709
H2.10.14	10	12 h at 21°C, 4 h at 45°C	3	WT	2.72478	2.90312	1.53221	1.71271	1.58203	1.56118	1.26119	2.63139
H2.10.24	10	12 h at 21°C, 4 h at 45°C	3	WT	2.71827	2.89643	1.52883	1.69656	1.58892	1.54504	1.26264	2.63803
H2.10.51	10	12 h at 21°C, 4 h at 45°C	3	WT	2.72668	2.89365	1.54099	1.69248	1.57809	1.55002	1.25531	2.6242
H2.10.53	10	12 h at 21°C, 4 h at 45°C	3	WT	2.72112	2.89587	1.54896	1.7077	1.58874	1.55766	1.26378	2.63685
H2.10.71	10	12 h at 21°C, 4 h at 45°C	3	WT	2.71988	2.89592	1.54049	1.69511	1.58027	1.56033	1.26105	2.63299
H3.10.01	10	12 h at 21°C, 4 h at 45°C	3	WT	2.72054	2.89315	1.66305	1.8585	1.61488	1.54448	1.2638	2.68174
H3.10.05	10	12 h at 21°C, 4 h at 45°C	3	WT	2.7164	2.89562	1.63418	1.80956	1.59231	1.53245	1.2627	2.66742
H3.10.28	10	12 h at 21°C, 4 h at 45°C	3	WT	2.71944	2.89829	1.5442	1.77555	1.5932	1.5426	1.2648	2.64934
H3.10.29	10	12 h at 21°C, 4 h at 45°C	3	WT	2.71761	2.89679	1.57843	1.78309	1.59397	1.54475	1.2661	2.65737
H3.10.34	10	12 h at 21°C, 4 h at 45°C	3	WT	2.72097	2.89525	1.63896	1.81069	1.58392	1.55171	1.26436	2.66032
H3.10.45	10	12 h at 21°C, 4 h at 45°C	3	WT	2.72424	2.90139	1.6431	1.81591	1.58677	1.56019	1.27021	2.66629
H1.11.09	11	12 h at 38°C, 4 h at 45°C	2	WT	2.74343	2.93265	1.52083	1.72694	1.5856	1.54019	1.28139	2.65605
H1.11.22	11	12 h at 38°C, 4 h at 45°C	2	WT	2.742	2.93548	1.51648	1.72759	1.5827	1.54634	1.27231	2.64267
H1.11.23	11	12 h at 38°C, 4 h at 45°C	2	WT	2.74392	2.93802	1.53328	1.73071	1.5781	1.54885	1.27312	2.64313
H1.11.28	11	12 h at 38°C, 4 h at 45°C	2	WT	2.73863	2.93422	1.50011	1.71956	1.5855	1.53093	1.27551	2.64468
H1.11.54	11	12 h at 38°C, 4 h at 45°C	2	WT	2.73623	2.93174	1.50875	1.71101	1.58436	1.52219	1.27534	2.64397
H1.11.71	11	12 h at 38°C, 4 h at 45°C	2	WT	2.73622	2.93253	1.51951	1.71513	1.58107	1.53317	1.27178	2.64658
H2.11.08	11	12 h at 38°C, 4 h at 45°C	2	WT	2.73506	2.92654	1.5104	1.74552	1.60271	1.55075	1.26866	2.63782
H2.11.14	11	12 h at 38°C, 4 h at 45°C	2	WT	2.73357	2.92458	1.56607	1.7533	1.5986	1.55539	1.26302	2.64508
H2.11.24	11	12 h at 38°C, 4 h at 45°C	2	WT	2.7379	2.91915	1.50913	1.73726	1.60743	1.54571	1.26377	2.63951
H2.11.51	11	12 h at 38°C, 4 h at 45°C	2	WT	2.7342	2.92258	1.53246	1.76303	1.61379	1.52468	1.2775	2.64301
H2.11.71	11	12 h at 38°C, 4 h at 45°C	2	WT	2.74255	2.92318	1.54743	1.73486	1.60059	1.54042	1.27342	2.66688
H3.11.01	11	12 h at 38°C, 4 h at 45°C	2	WT	2.72119	2.91302	1.71279	1.88568	1.60891	1.54452	1.25899	2.66472
H3.11.05	11	12 h at 38°C, 4 h at 45°C	2	WT	2.73509	2.90086	1.73164	1.83962	1.60202	1.49056	1.25301	2.65542
H3.11.28	11	12 h at 38°C, 4 h at 45°C	2	WT	2.73214	2.91008	1.64274	1.87894	1.617	1.53262	1.25144	2.6469
H3.11.29	11	12 h at 38°C, 4 h at 45°C	2	WT	2.73399	2.90798	1.63817	1.88194	1.60785	1.53433	1.25655	2.65536
H3.11.34	11	12 h at 38°C, 4 h at 45°C	2	WT	2.73428	2.90917	1.63172	1.8834	1.60538	1.54104	1.2535	2.64826
H3.11.45	11	12 h at 38°C, 4 h at 45°C	2	WT	2.74045	2.90992	1.68607	1.88861	1.60385	1.54231	1.2575	2.65767
H1.12.09	12	17 h at 21°C	1	WT	2.74214	2.91017	1.4968	1.80957	1.67149	1.54413	1.25695	2.55915
H1.12.22	12	17 h at 21°C	1	WT	2.75134	2.915	1.50332	1.83084	1.67825	1.55749	1.26275	2.55013
H1.12.23	12	17 h at 21°C	1	WT	2.75379	2.91732	1.60076	1.84062	1.68093	1.56045	1.26102	2.56448
H1.12.28	12	17 h at 21°C	1	WT	2.76466	2.93278	1.57358	1.85679	1.64682	1.55331	1.27463	2.58942
H1.12.54	12	17 h at 21°C	1	WT	2.76325	2.93644	1.56014	1.86838	1.66141	1.57666	1.27403	2.59225
H1.12.71	12	17 h at 21°C	1	WT	2.75819	2.92168	1.60936	1.84451	1.67742	1.5757	1.26607	2.57418
H2.12.08	12	17 h at 21°C	1	WT	2.73231	2.90531	1.56724	1.79865	1.66364	1.53807	1.25575	2.55913
H2.12.14	12	17 h at 21°C	1	WT	2.74089	2.90899	1.55111	1.81325	1.66869	1.55187	1.25595	2.57496
H2.12.24	12	17 h at 21°C	1	WT	2.71078	2.90473	1.50791	1.79813	1.63774	1.52926	1.24979	2.52578
H2.12.51	12	17 h at 21°C	1	WT	2.74539	2.90874	1.55873	1.80174	1.65842	1.54867	1.25221	2.57303
H2.12.53	12	17 h at 21°C	1	WT	2.73928	2.91302	1.56065	1.82811	1.67022	1.55399	1.26071	2.58079
H2.12.71	12	17 h at 21°C	1	WT	2.72554	2.90491	1.6252	1.80246	1.66125	1.54095	1.25332	2.55496
H3.12.01	12	17 h at 21°C	1	WT	2.73541	2.91458	1.58603	1.82626	1.67565	1.59019	1.25583	2.56215
H3.12.05	12	17 h at 21°C	1	WT	2.73809	2.91239	1.49983	1.83011	1.67878	1.58523	1.25625	2.5801
H3.12.28	12	17 h at 21°C	1	WT	2.74534	2.9092	1.62423	1.82347	1.68039	1.55657	1.26317	2.59025
H3.12.29	12	17 h at 21°C	1	WT	2.73973	2.91384	1.57443	1.82302	1.67521	1.57851	1.25851	2.56767
H3.12.34	12	17 h at 21°C	1	WT	2.73865	2.91149	1.58915	1.82277	1.68453	1.57026	1.2622	2.57814
H3.12.45	12	17 h at 21°C	1	WT	2.73737	2.91387	1.58414	1.83124	1.68244	1.58902	1.26399	2.56668
H1.13.09	13	12 h at 21°C, 4 h at 45°C, 1 h at 21°C	3	WT	2.74834	2.91033	1.62007	1.84157	1.64405	1.52831	1.27749	2.60947
H1.13.22	13	12 h at 21°C, 4 h at 45°C, 1 h at 21°C	3	WT	2.73777	2.90118	1.57335	1.8215	1.64116	1.5116	1.27392	2.61857
H1.13.23	13	12 h at 21°C, 4 h at 45°C, 1 h at 21°C	3	WT	2.7424	2.90411	1.62915	1.83393	1.63006	1.53148	1.27353	2.61143
H1.13.28	13	12 h at 21°C, 4 h at 45°C, 1 h at 21°C	3	WT	2.7388	2.90756	1.61271	1.83288	1.63348	1.54554	1.26915	2.59316
H1.13.54	13	12 h at 21°C, 4 h at 45°C, 1 h at 21°C	3	WT	2.74482	2.90279	1.59342	1.8369	1.63502	1.54033	1.27431	2.6252
H1.13.71	13	12 h at 21°C, 4 h at 45°C, 1 h at 21°C	3	WT	2.75114	2.89121	1.69326	1.80884	1.63343	1.49722	1.27142	2.64653
H2.13.08	13	12 h at 21°C, 4 h at 45°C, 1 h at 21°C	3	WT	2.72114	2.89249	1.58398	1.78903	1.60899	1.54397	1.27048	2.65085
H2.13.14	13	12 h at 21°C, 4 h at 45°C, 1 h at 21°C	3	WT	2.72387	2.88846	1.54636	1.75602	1.61203	1.53411	1.26172	2.63117
H2.13.24	13	12 h at 21°C, 4 h at 45°C, 1 h at 21°C	3	WT	2.73089	2.8845	1.58334	1.76408	1.60765	1.53815	1.26165	2.62762
H2.13.51	13	12 h at 21°C, 4 h at 45°C, 1 h at 21°C	3	WT	2.71449	2.88211	1.59676	1.75038	1.61205	1.52804	1.27085	2.61272
H2.13.53	13	12 h at 21°C, 4 h at 45°C, 1 h at 21°C	3	WT	2.72054	2.89488	1.57973	1.75848	1.61578	1.53986	1.27259	2.61743
H2.13.71	13	12 h at 21°C, 4 h at 45°C, 1 h at 21°C	3	WT	2.72033	2.89231	1.6166	1.7788	1.6205	1.53513	1.28058	2.64134
H3.13.01	13	12 h at 21°C, 4 h at 45°C, 1 h at 21°C	3	WT	2.71777	2.8931	1.71252	1.8648	1.6201	1.55278	1.27108	2.67955
H3.13.05	13	12 h at 21°C, 4 h at 45°C, 1 h at 21°C	3	WT	2.72121	2.89618	1.65329	1.86628	1.61928	1.56102	1.27336	2.68248
H3.13.28	13	12 h at 21°C, 4 h at 45°C, 1 h at 21°C	3	WT	2.72122	2.89292	1.62323	1.82629	1.61672	1.54706	1.27065	2.64663
H3.13.29	13	12 h at 21°C, 4 h at 45°C, 1 h at 21°C	3	WT	2.71623	2.8931	1.60177	1.83681	1.61961	1.54424	1.27173	2.65489
H3.13.34	13	12 h at 21°C, 4 h at 45°C, 1 h at 21°C	3	WT	2.71467	2.89412	1.61675	1.85542	1.60899	1.55532	1.27259	2.6555
H3.13.45	13	12 h at 21°C, 4 h at 45°C, 1 h at 21°C	3	WT	2.72696	2.89567	1.61098	1.8682	1.62732	1.55092	1.2749	2.67448
H1.14.09	14	12 h at 38°C, 4 h at 45°C, 1 h at 21°C	2	WT	2.74057	2.92106	1.56799	1.82709	1.61995	1.55036	1.2727	2.65069
H1.14.22	14	12 h at 38°C, 4 h at 45°C, 1 h at 21°C	2	WT	2.73662	2.92631	1.57461	1.81936	1.61777	1.55636	1.27228	2.64289
H1.14.23	14	12 h at 38°C, 4 h at 45°C, 1 h at 21°C	2	WT	2.75098	2.92503	1.56088	1.81581	1.61475	1.5443	1.26991	2.62172
H1.14.28	14	12 h at 38°C, 4 h at 45°C, 1 h at 21°C	2	WT	2.73997	2.92121	1.51024	1.81403	1.61767	1.55607	1.26592	2.64935
H1.14.71	14	12 h at 38°C, 4 h at 45°C, 1 h at 21°C	2	WT	2.73702	2.9184	1.68869	1.80926	1.61398	1.55008	1.26685	2.63713
H2.14.08	14	12 h at 38°C, 4 h at 45°C, 1 h at 21°C	2	WT	2.7537	2.9194	1.55509	1.7937	1.61739	1.53008	1.27005	2.60706
H2.14.14	14	12 h at 38°C, 4 h at 45°C, 1 h at 21°C	2	WT	2.7412	2.92428	1.60281	1.79797	1.61984	1.55256	1.27296	2.64865
H2.14.24	14	12 h at 38°C, 4 h at 45°C, 1 h at 21°C	2	WT	2.75287	2.91225	1.54202	1.77598	1.61977	1.50561	1.27243	2.60109
H2.14.51	14	12 h at 38°C, 4 h at 45°C, 1 h at 21°C	2	WT	2.73846	2.90891	1.57463	1.77777	1.61055	1.52181	1.26381	2.62656
H2.14.53	14	12 h at 38°C, 4 h at 45°C, 1 h at 21°C	2	WT	2.74062	2.91808	1.54396	1.77598	1.62109	1.54206	1.26879	2.61124
H2.14.71	14	12 h at 38°C, 4 h at 45°C, 1 h at 21°C	2	WT	2.73778	2.91063	1.55324	1.76164	1.61474	1.5251	1.26583	2.61918
H3.14.01	14	12 h at 38°C, 4 h at 45°C, 1 h at 21°C	2	WT	2.728	2.9182	1.69162	1.88374	1.63306	1.55274	1.26574	2.62988
H3.14.05	14	12 h at 38°C, 4 h at 45°C, 1 h at 21°C	2	WT	2.72723	2.92148	1.69144	1.89104	1.63409	1.56433	1.26547	2.64123
H3.14.28	14	12 h at 38°C, 4 h at 45°C, 1 h at 21°C	2	WT	2.73669	2.91928	1.65527	1.87989	1.63747	1.54599	1.27544	2.64078
H3.14.29	14	12 h at 38°C, 4 h at 45°C, 1 h at 21°C	2	WT	2.73862	2.92112	1.6573	1.87775	1.62963	1.55581	1.2722	2.62472
H3.14.34	14	12 h at 38°C, 4 h at 45°C, 1 h at 21°C	2	WT	2.74698	2.91306	1.65362	1.86423	1.62775	1.51394	1.27487	2.62402
H3.14.45	14	12 h at 38°C, 4 h at 45°C, 1 h at 21°C	2	WT	2.73655	2.91671	1.63111	1.86209	1.62954	1.53231	1.27588	2.61193
H1.15.09	15	40 h at 21°C	1	WT	2.72126	2.93173	1.59964	1.82429	1.63642	1.5242	1.28142	2.52569
H1.15.22	15	40 h at 21°C	1	WT	2.72021	2.93022	1.57026	1.82755	1.62964	1.52407	1.2842	2.54329
H1.15.23	15	40 h at 21°C	1	WT	2.71695	2.93248	1.59206	1.82247	1.62721	1.53673	1.27848	2.52865
H1.15.28	15	40 h at 21°C	1	WT	2.73308	2.93315	1.55277	1.82994	1.63742	1.53029	1.28219	2.52381
H1.15.54	15	40 h at 21°C	1	WT	2.72202	2.93054	1.5724	1.82634	1.63812	1.50859	1.2858	2.53168
H1.15.71	15	40 h at 21°C	1	WT	2.71616	2.92989	1.60706	1.81464	1.62086	1.51634	1.27573	2.53023
H2.15.08	15	40 h at 21°C	1	WT	2.73441	2.92437	1.59605	1.83342	1.68085	1.55835	1.27307	2.58309
H2.15.14	15	40 h at 21°C	1	WT	2.72787	2.91865	1.59712	1.83522	1.68447	1.53503	1.2745	2.57356
H2.15.24	15	40 h at 21°C	1	WT	2.7343	2.9172	1.59961	1.82975	1.68653	1.5519	1.26721	2.57769
H2.15.51	15	40 h at 21°C	1	WT	2.73191	2.92507	1.63396	1.84358	1.67448	1.56318	1.27215	2.5802
H2.15.53	15	40 h at 21°C	1	WT	2.72857	2.92659	1.63814	1.83658	1.67276	1.56762	1.2694	2.56366
H2.15.71	15	40 h at 21°C	1	WT	2.73179	2.919	1.62742	1.83222	1.67819	1.56126	1.27046	2.57815
H3.15.01	15	40 h at 21°C	1	WT	2.73376	2.91582	NA	1.84338	1.71783	1.52603	1.26403	2.53926
H3.15.05	15	40 h at 21°C	1	WT	2.73664	2.92199	NA	1.85654	1.73057	1.51678	1.2682	2.51448
H3.15.28	15	40 h at 21°C	1	WT	2.74198	2.91794	NA	1.85039	1.71199	1.55023	1.25966	2.54864
H3.15.29	15	40 h at 21°C	1	WT	2.73859	2.91991	NA	1.85842	1.72571	1.51007	1.27184	2.53873
H3.15.34	15	40 h at 21°C	1	WT	2.74193	2.92221	NA	1.86137	1.71975	1.54372	1.26719	2.53452
H3.15.45	15	40 h at 21°C	1	WT	2.74325	2.91604	NA	1.84964	1.71317	1.52959	1.27121	2.53744
H1.16.09	16	12 h at 21°C, 4 h at 45°C, 24 h at 21°C	3	WT	2.76046	2.90519	1.55774	1.83599	1.66788	1.53625	1.29718	2.68636
H1.16.22	16	12 h at 21°C, 4 h at 45°C, 24 h at 21°C	3	WT	2.74393	2.89287	1.49064	1.83531	1.67971	1.55232	1.27608	2.6184
H1.16.23	16	12 h at 21°C, 4 h at 45°C, 24 h at 21°C	3	WT	2.7348	2.88537	1.58981	1.8396	1.6887	1.53963	1.27454	2.62592
H1.16.28	16	12 h at 21°C, 4 h at 45°C, 24 h at 21°C	3	WT	2.758	2.90523	1.56296	1.84728	1.68047	1.54305	1.28616	2.65189
H1.16.54	16	12 h at 21°C, 4 h at 45°C, 24 h at 21°C	3	WT	2.76233	2.90909	1.6083	1.84502	1.67883	1.54941	1.28894	2.6552
H2.16.08	16	12 h at 21°C, 4 h at 45°C, 24 h at 21°C	3	WT	2.71526	2.87164	1.57853	1.80544	1.69554	1.51838	1.25989	2.59478
H2.16.14	16	12 h at 21°C, 4 h at 45°C, 24 h at 21°C	3	WT	2.70976	2.89095	1.60942	1.81445	1.67996	1.54053	1.25698	2.59325
H2.16.24	16	12 h at 21°C, 4 h at 45°C, 24 h at 21°C	3	WT	2.72387	2.88217	1.62761	1.83277	1.70344	1.51823	1.26925	2.61386
H2.16.51	16	12 h at 21°C, 4 h at 45°C, 24 h at 21°C	3	WT	2.71812	2.88798	1.63113	1.81232	1.67117	1.5283	1.25633	2.58717
H2.16.53	16	12 h at 21°C, 4 h at 45°C, 24 h at 21°C	3	WT	2.71556	2.88978	1.66118	1.8233	1.68596	1.53507	1.26514	2.58478
H2.16.71	16	12 h at 21°C, 4 h at 45°C, 24 h at 21°C	3	WT	2.70898	2.88713	1.64006	1.83026	1.68567	1.53926	1.25932	2.59455
H3.16.01	16	12 h at 21°C, 4 h at 45°C, 24 h at 21°C	3	WT	2.71271	2.86782	NA	1.81079	1.67637	1.5075	1.2869	2.70067
H3.16.05	16	12 h at 21°C, 4 h at 45°C, 24 h at 21°C	3	WT	2.71922	2.86227	NA	1.80235	1.66851	1.49007	1.28091	2.69686
H3.16.28	16	12 h at 21°C, 4 h at 45°C, 24 h at 21°C	3	WT	2.71095	2.85848	NA	1.79311	1.67045	1.50092	1.27445	2.68868
H3.16.29	16	12 h at 21°C, 4 h at 45°C, 24 h at 21°C	3	WT	2.72046	2.86474	NA	1.79478	1.6761	1.50315	1.28011	2.69068
H3.16.34	16	12 h at 21°C, 4 h at 45°C, 24 h at 21°C	3	WT	2.72062	2.8656	NA	1.83845	1.67292	1.51483	1.28767	2.70449
H3.16.45	16	12 h at 21°C, 4 h at 45°C, 24 h at 21°C	3	WT	2.7212	2.87183	NA	1.8322	1.67895	1.52652	1.28728	2.70454
H1.17.09	17	12 h at 38°C, 4 h at 45°C, 24 h at 21°C	2	WT	2.71814	2.89912	1.53258	1.80819	1.65746	1.49549	1.27797	2.66747
H1.17.22	17	12 h at 38°C, 4 h at 45°C, 24 h at 21°C	2	WT	2.72236	2.90385	1.54896	1.81672	1.65478	1.51286	1.27933	2.62393
H1.17.23	17	12 h at 38°C, 4 h at 45°C, 24 h at 21°C	2	WT	2.72271	2.9039	1.50896	1.81055	1.64806	1.50304	1.2794	2.61491
H1.17.28	17	12 h at 38°C, 4 h at 45°C, 24 h at 21°C	2	WT	2.73373	2.90903	1.55065	1.82956	1.66472	1.52109	1.28449	2.5893
H1.17.54	17	12 h at 38°C, 4 h at 45°C, 24 h at 21°C	2	WT	2.72343	2.90609	1.52484	1.83228	1.65967	1.54624	1.27375	2.57992
H1.17.71	17	12 h at 38°C, 4 h at 45°C, 24 h at 21°C	2	WT	2.72937	2.90372	1.54122	1.80914	1.65607	1.4918	1.28315	2.63144
H2.17.08	17	12 h at 38°C, 4 h at 45°C, 24 h at 21°C	2	WT	2.72163	2.8779	1.58212	1.80424	1.66782	1.54209	1.26013	2.55992
H2.17.14	17	12 h at 38°C, 4 h at 45°C, 24 h at 21°C	2	WT	2.72841	2.88069	1.59162	1.79339	1.64916	1.53204	1.25028	2.56501
H2.17.24	17	12 h at 38°C, 4 h at 45°C, 24 h at 21°C	2	WT	2.72754	2.87505	1.57526	1.78787	1.65078	1.49796	1.25047	2.56848
H2.17.51	17	12 h at 38°C, 4 h at 45°C, 24 h at 21°C	2	WT	2.72947	2.88926	1.57247	1.80878	1.65934	1.54246	1.25956	2.56475
H2.17.53	17	12 h at 38°C, 4 h at 45°C, 24 h at 21°C	2	WT	2.72709	2.88523	1.5798	1.80696	1.65964	1.54108	1.25332	2.56712
H2.17.71	17	12 h at 38°C, 4 h at 45°C, 24 h at 21°C	2	WT	2.72017	2.87854	1.61108	1.80142	1.65408	1.52529	1.25675	2.5777
H3.17.01	17	12 h at 38°C, 4 h at 45°C, 24 h at 21°C	2	WT	2.73534	2.87407	NA	1.80677	1.67907	1.47799	1.2974	2.6581
H3.17.05	17	12 h at 38°C, 4 h at 45°C, 24 h at 21°C	2	WT	2.7365	2.8782	NA	1.81481	1.67947	1.52208	1.30027	2.70232
H3.17.28	17	12 h at 38°C, 4 h at 45°C, 24 h at 21°C	2	WT	2.7378	2.88501	NA	1.82297	1.68913	1.53766	1.30105	2.69434
H3.17.29	17	12 h at 38°C, 4 h at 45°C, 24 h at 21°C	2	WT	2.73803	2.88529	NA	1.82628	1.684	1.54894	1.30139	2.69258
H3.17.34	17	12 h at 38°C, 4 h at 45°C, 24 h at 21°C	2	WT	2.73445	2.87431	NA	1.81848	1.67442	1.49815	1.30041	2.70556
H3.17.45	17	12 h at 38°C, 4 h at 45°C, 24 h at 21°C	2	WT	2.73393	2.87897	NA	1.83444	1.67962	1.53483	1.30885	2.72263
Average values for WT by treatment
Average	1	0 time, 4-wk-old plants, 21°C			2.73954	2.89738	1.56622	1.82294	1.67366	1.52976	1.25746	2.52974
Average	2	1 h at 21°C			2.73677	2.902	1.57405	1.82524	1.65176	1.51184	1.2576	2.52842
Average	3	1 h at 38°C			2.73527	2.9037	1.53428	1.80611	1.63262	1.5185	1.2591	2.52637
Average	4	12 h at 21°C			2.74288	2.9339	1.57445	1.90399	1.68147	1.57574	1.26094	2.60288
Average	5	12 h at 38°C			2.74224	2.92745	1.53316	1.82798	1.62185	1.53227	1.26818	2.63131
Average	6	13 h at 21°C			2.73465	2.92889	1.58829	1.86516	1.66086	1.55021	1.27066	2.5855
Average	7	12 h at 21°C, 1 h at 45°C			2.7407	2.93092	1.55166	1.8463	1.61944	1.57087	1.26718	2.59578
Average	8	12 h at 38°C, 1 h at 45°C			2.73509	2.93722	1.55491	1.82815	1.60966	1.55335	1.26359	2.61119
Average	9	16 h at 21°C			2.73624	2.92229	1.60943	1.83088	1.66252	1.54472	1.27221	2.56221
Average	10	12 h at 21°C, 4 h at 45°C			2.72668	2.90339	1.56825	1.75428	1.59358	1.55203	1.26417	2.64749
Average	11	12 h at 38°C, 4 h at 45°C			2.73652	2.92186	1.57692	1.78371	1.59797	1.53671	1.26628	2.64928
Average	12	17 h at 21°C			2.74234	2.91414	1.56514	1.825	1.66963	1.56113	1.26017	2.56907
Average	13	12 h at 21°C, 4 h at 45°C, 1 h at 21°C			2.72848	2.89539	1.61374	1.81612	1.62257	1.53806	1.27178	2.63772
Average	14	12 h at 38°C, 4 h at 45°C, 1 h at 21°C			2.74023	2.91855	1.60321	1.82514	1.6223	1.54115	1.27007	2.62871
Average	15	40 h at 21°C			2.73082	2.92404	1.59887	1.83754	1.677	1.53633	1.27315	2.54738
Average	16	12 h at 21°C, 4 h at 45°C, 24 h at 21°C			2.72684	2.88224	1.59613	1.82314	1.68004	1.52608	1.27571	2.64659
Average	17	12 h at 38°C, 4 h at 45°C, 24 h at 21°C			2.72889	2.88824	1.55996	1.81294	1.66485	1.52062	1.27878	2.62697
WT averages arranged by path
Path 1 - WT
Average	1	0 time, 4-wk-old plants, 21°C			2.73954	2.89738	1.56622	1.82294	1.67366	1.52976	1.25746	2.52974
Average	2	1 h at 21°C			2.73677	2.902	1.57405	1.82524	1.65176	1.51184	1.2576	2.52842
Average	4	12 h at 21°C			2.74288	2.9339	1.57445	1.90399	1.68147	1.57574	1.26094	2.60288
Average	6	13 h at 21°C			2.73465	2.92889	1.58829	1.86516	1.66086	1.55021	1.27066	2.5855
Average	9	16 h at 21°C			2.73624	2.92229	1.60943	1.83088	1.66252	1.54472	1.27221	2.56221
Average	12	17 h at 21°C			2.74234	2.91414	1.56514	1.825	1.66963	1.56113	1.26017	2.56907
Average	15	40 h at 21°C			2.73082	2.92404	1.59887	1.83754	1.677	1.53633	1.27315	2.54738
Path 2- WT
Average	1	0 time, 4-wk-old plants, 21°C			2.73954	2.89738	1.56622	1.82294	1.67366	1.52976	1.25746	2.52974
Average	3	1 h at 38°C			2.73527	2.9037	1.53428	1.80611	1.63262	1.5185	1.2591	2.52637
Average	5	12 h at 38°C			2.74224	2.92745	1.53316	1.82798	1.62185	1.53227	1.26818	2.63131
Average	8	12 h at 38°C, 1 h at 45°C			2.73509	2.93722	1.55491	1.82815	1.60966	1.55335	1.26359	2.61119
Average	11	12 h at 38°C, 4 h at 45°C			2.73652	2.92186	1.57692	1.78371	1.59797	1.53671	1.26628	2.64928
Average	14	12 h at 38°C, 4 h at 45°C, 1 h at 21°C			2.74023	2.91855	1.60321	1.82514	1.6223	1.54115	1.27007	2.62871
Average	17	12 h at 38°C, 4 h at 45°C, 24 h at 21°C			2.72889	2.88824	1.55996	1.81294	1.66485	1.52062	1.27878	2.62697
Path 3 - WT
Average	1	0 time, 4-wk-old plants, 21°C			2.73954	2.89738	1.56622	1.82294	1.67366	1.52976	1.25746	2.52974
Average	2	1 h at 21°C			2.73677	2.902	1.57405	1.82524	1.65176	1.51184	1.2576	2.52842
Average	4	12 h at 21°C			2.74288	2.9339	1.57445	1.90399	1.68147	1.57574	1.26094	2.60288
Average	7	12 h at 21°C, 1 h at 45°C			2.7407	2.93092	1.55166	1.8463	1.61944	1.57087	1.26718	2.59578
Average	10	12 h at 21°C, 4 h at 45°C			2.72668	2.90339	1.56825	1.75428	1.59358	1.55203	1.26417	2.64749
Average	13	12 h at 21°C, 4 h at 45°C, 1 h at 21°C			2.72848	2.89539	1.61374	1.81612	1.62257	1.53806	1.27178	2.63772
Average	16	12 h at 21°C, 4 h at 45°C, 24 h at 21°C			2.72684	2.88224	1.59613	1.82314	1.68004	1.52608	1.27571	2.64659

## Sheet: Table S8
Table S8. Levels of leaf lipids from wild-type and ugt80A2,B1 double mutant plants, before and after severe heat treatment. Lipid amounts are presented as normalized intensity per mg of leaf dry mass, where a signal of 1 corresponds to the same amount of signal as derived from 1 pmol of internal standard(s). Data from 6 biological replicates of each treatment for wild-type (WT) Col-0 plants and 9…
"x" indicates the lipid did not meet LOD criterion of > 0.25 normalized intensity units
"x" indicates the lipid did not meet CoV standard of < 0.20					x
Lipid number			lipid0599	lipid0600	lipid0601	lipid0603	lipid0473	lipid0474	lipid0476	lipid0483	lipid0468	lipid0448	lipid0454	lipid0498	lipid0500	lipid0519	lipid0522	lipid0525	lipid0489	lipid0495	lipid0526	lipid0528	lipid0514	lipid0515	lipid0516	lipid0518	lipid0551	lipid0553	lipid0596	lipid0501	lipid0506	lipid0503	lipid0505	lipid0508	lipid0512	lipid0542	lipid0543	lipid0544	lipid0546	lipid0545	lipid0548	lipid0566	lipid0570	lipid0580	lipid0591	lipid0592	lipid0595	lipid0532	lipid0533
Sample name ("HT" for "high temperature".Tray number.Well number in tray)	Treatment	Genotype	acDGDG(18:4-O/34:6)	acDGDG(18:4-O/34:7-O)	acDGDG(18:4-O/34:8-2O) or acDGDG(18:4-O/36:6)	acDGDG(18:4-O/36:8-2O)	acMGDG(16:0/34:6)	acMGDG(16:0/34:7-O)	acMGDG(16:0/34:8-2O) or acMGDG(16:0/36:6)	acMGDG(16:0/36:8-2O)	acMGDG(16:1/34:8-2O) or acMGDG(16:1/36:6)	acMGDG(16:3/34:6)	acMGDG(16:3/34:8-2O) or acMGDG(16:3/36:6)	acMGDG(16:3-O/34:8-2O) or acMGDG(16:3-O/36:6)	acMGDG(16:3-O/36:8-2O)	acMGDG(16:3-2O/34:6) or acMGDG(18:1/34:6)	acMGDG(16:3-2O/34:8-2O) or acMGDG(16:3-2O/36:6) or acMGDG(18:1/34:8-2O) or acMGDG(18:1/36:6)	acMGDG(16:3-2O/36:8-2O) or acMGDG(18:1/36:8-2O)	acMGDG(16:4-O/34:8-2O) or acMGDG(16:4-O/36:6)	acMGDG(16:4-O/36:8-2O)	acMGDG(18:0/34:6)	acMGDG(18:0/34:8-2O) or acMGDG(18:0/36:6)	acMGDG(18:2/34:6)	acMGDG(18:2/34:7-O)	acMGDG(18:2/34:8-2O) or acMGDG(18:2/36:6)	acMGDG(18:2/36:8-2O)	acMGDG(18:2-O/34:8-2O) or acMGDG(18:2-O/36:6)	acMGDG(18:2-O/36:8-2O)	acMGDG(18:2-3O/34:8-2O) or acMGDG(18:2-3O/36:6)	acMGDG(18:3/34:6)	acMGDG(18:3/34:7-2O) or acMGDG(18:3/36:5)	acMGDG(18:3/34:7-O)	acMGDG(18:3/34:8-2O) or acMGDG(18:3/36:6)	acMGDG(18:3/36:7-O)	acMGDG(18:3/36:8-2O)	acMGDG(18:3-O/34:6)	acMGDG(18:3-O/34:7-O)	acMGDG(18:3-O/34:8-2O) or acMGDG(18:3-O/36:6)	acMGDG(18:3-O/36:6-O)	acMGDG(18:3-O/36:7-O)	acMGDG(18:3-O/36:8-2O)	acMGDG(18:3-2O/34:6)	acMGDG(18:3-2O/34:8-2O) or acMGDG(18:3-2O/36:6)	acMGDG(18:3-2O/36:8-2O)	acMGDG(18:3-3O/34:6)	acMGDG(18:3-3O/34:7-O)	acMGDG(18:3-3O/36:8-2O)	acMGDG(18:4-O/34:6)	acMGDG(18:4-O/34:7-O)
HT.06.01	21°C	WT	1.93713	1.95728	16.9251	0.373309	3.99802	8.83758	0.697745	0.683624	4.98914	2.31315	4.29555	3.77385	3.42252	5.0934	5.83584	1.96891	2.59992	1.26141	2.80842	2.39966	4.25817	5.21413	3.88239	2.66578	4.47862	2.75914	9.30149	1.16659	3.15501	1.4709	0.620221	3.99263	1.25114	4.70032	4.00829	1.65898	3.38708	6.07462	0.399029	1.05125	6.90929	0.407679	2.387	3.19913	0.79454	1.16164	1.95558
HT.06.24	21°C	WT	1.66481	1.48173	8.90597	0.201581	2.03441	5.54918	0.365097	0.35517	3.45733	1.54302	3.09701	3.03846	1.81424	3.81748	5.08546	1.23603	1.64517	0.675103	2.06188	1.68755	2.98252	3.83693	3.19394	1.89902	4.33594	1.60512	10.2431	0.5024	2.67457	0.852545	0.402588	2.55155	0.923563	3.06634	2.79795	1.3441	3.67291	4.71762	0.370215	0.969046	6.03985	0.236631	1.51641	2.02992	0.611979	0.874078	1.39227
HT.06.35	21°C	WT	1.88132	1.43636	9.78942	0.229454	2.45525	6.14405	0.568198	0.352639	4.08492	1.69542	3.19674	3.42311	2.07807	3.99714	4.38437	1.28426	2.04688	0.689287	2.3783	2.05642	2.46589	4.26828	3.39461	1.66193	4.86926	1.90606	10.1294	0.618434	3.51106	1.18551	0.478058	2.38384	0.888533	3.24209	2.88653	1.46075	4.83101	4.98885	0.479297	1.0295	6.12842	0.282547	1.48759	2.14798	0.679011	0.907555	1.60113
HT.06.46	21°C	WT	1.4977	1.31938	8.0073	0.217969	1.9963	5.18158	0.324504	0.302846	3.17115	1.53947	3.20806	2.68149	1.77152	3.04929	4.07154	1.09085	1.76762	0.505598	1.90652	1.58077	2.10374	3.78097	3.63414	1.74683	3.99068	1.49037	8.14171	0.644019	3.15858	0.90506	0.374548	2.58167	0.90624	2.75687	2.78047	1.10513	3.59918	4.49995	0.353099	0.520368	5.49504	0.22005	1.23228	1.85853	0.545746	0.704469	1.20448
HT.06.57	21°C	WT	1.34119	1.26891	8.24214	0.24	1.98496	5.36362	0.419976	0.29303	3.15342	1.44258	2.84614	2.86817	1.73864	2.83597	4.48366	1.03843	1.81354	0.695524	1.7262	1.86752	2.17676	3.08598	2.87613	1.5087	4.20492	1.36694	9.25048	0.647866	2.81873	0.880208	0.449498	2.27058	0.808417	2.72064	2.74299	1.18721	3.43964	4.07523	0.365699	0.770439	5.39559	0.233808	1.21863	1.78186	0.581568	0.793192	1.3946
HT.06.68	21°C	WT	1.99753	1.63413	9.09771	0.21968	2.29256	5.74167	0.511857	0.289495	3.42226	1.6006	3.70929	3.19773	2.23525	3.20049	4.77898	1.33948	1.96955	0.868008	2.26478	1.82814	3.13043	4.19248	3.40458	2.28646	5.06976	1.66446	9.38845	0.679074	3.20971	1.12126	0.533709	3.03897	1.03833	3.57721	2.93329	1.59498	4.64144	5.39859	0.40386	0.795549	6.04192	0.238449	1.49115	2.37585	0.689716	0.919886	1.57821
HT.05.01	45°C for 12h	WT	1.55245	1.53262	12.0082	0.498352	70.7726	10.5848	5.42895	0.700629	4.63223	53.1557	8.65385	6.8059	4.63996	21.9088	10.178	2.32969	1.71106	0.534611	7.14817	3.22609	43.6346	6.87253	19.3879	2.15718	6.93839	3.2944	17.3279	109.667	44.4655	5.57209	26.7984	4.16051	2.02743	7.73493	3.63036	7.69304	3.1672	4.14535	0.705066	1.08557	5.52717	0.428725	1.80572	2.16733	0.638133	0.884478	2.15469
HT.05.24	45°C for 12h	WT	1.54752	1.52623	10.5581	0.385613	103.042	9.58841	7.12633	0.554337	5.09829	72.5689	11.2409	7.40653	3.68053	36.6134	14.2856	1.99973	1.86525	0.541652	9.27368	4.06184	65.0714	7.96923	27.4366	1.68701	7.90859	2.83293	15.0352	162.451	66.2018	6.35378	40.403	3.38802	2.1475	8.84792	3.61443	8.4029	2.94322	3.50773	0.686347	1.2415	5.70392	0.36755	1.89469	2.26515	0.565955	0.966235	2.66111
HT.05.46	45°C for 12h	WT	1.14839	1.44839	11.729	0.681303	41.3755	8.03453	4.4659	0.857372	3.88211	32.4567	8.4518	5.60574	3.4516	14.5464	8.78832	2.23841	1.87916	0.644403	5.39585	2.99141	22.8931	5.71754	12.5223	2.20522	6.47073	2.88385	13.3998	67.0317	25.7937	4.6145	16.9806	3.59511	2.16514	5.14699	3.1024	5.65083	2.41516	2.76751	0.760868	1.25328	7.40258	0.54418	1.60293	2.26948	0.623844	0.998577	2.25546
HT.05.57	45°C for 12h	WT	2.1334	2.14908	10.5523	0.691034	45.6498	10.1352	4.86641	1.05676	4.01242	27.7863	4.29845	6.64717	4.3877	20.0224	13.6212	3.32709	2.35775	0.716377	6.07846	3.1646	28.5355	7.5933	19.2803	2.72875	7.91441	3.92737	17.0777	66.2566	31.099	6.84785	18.5773	4.28637	3.07746	7.61361	3.70805	8.3679	2.51871	3.89956	1.08142	1.6144	8.54063	0.6324	2.14184	3.13562	0.887808	1.32261	2.89618
HT.05.68	45°C for 12h	WT	1.38701	1.66608	8.08085	0.495895	33.1917	8.37515	3.70034	0.902076	3.78972	18.7682	4.32453	6.63237	4.3348	17.2909	12.4271	3.23941	2.65252	0.706474	5.12354	2.99209	20.8499	6.02615	16.3229	2.35063	6.91514	3.26279	15.7596	46.4496	21.0322	4.28591	13.387	3.34931	2.45476	6.68903	3.34989	7.6387	2.18662	3.34637	0.789511	1.29974	8.13617	0.548406	1.82767	2.44806	0.777462	0.893401	2.49343
HT.05.35	45°C for 12h	WT	1.27636	1.53682	9.78934	0.628688	41.9292	8.44295	4.44602	0.914083	3.38223	28.9097	7.60527	5.07047	3.39521	14.318	7.52775	1.81509	1.53354	0.555875	5.12022	2.83459	24.8422	5.96776	11.9771	2.02171	6.01148	2.89252	11.2437	60.9008	23.0104	4.81167	15.5806	3.87794	2.34231	5.23105	2.82449	4.75092	2.05673	2.81649	0.759173	1.16532	6.49082	0.43873	1.6069	2.27975	0.700258	0.86245	2.36708
HT.06.04	21°C	ugt80A2,B1	1.37126	1.44965	8.61172	0.268813	2.97943	7.54272	0.580525	0.494813	4.35686	1.93881	4.57425	3.66363	2.90828	4.63444	4.93439	1.74267	2.39669	0.923708	2.15309	2.02214	3.51251	4.60104	3.73	2.25761	3.99109	2.4071	7.94662	1.07746	2.47981	1.07669	0.544833	3.22776	1.0617	3.68568	3.60783	1.19074	3.81053	5.14518	0.414159	0.953242	6.71297	0.298405	1.73176	2.62858	0.72333	0.9943	1.89257
HT.06.12	21°C	ugt80A2,B1	2.72014	1.3716	6.28152	0.193248	1.73044	4.25636	0.235666	0.30072	2.84122	1.43588	3.0808	2.69291	1.98926	4.91386	5.27693	1.16777	1.75782	0.704332	1.93476	1.21537	2.85563	3.65501	3.06636	1.92799	6.25008	1.88902	8.46204	0.606305	2.64119	0.828141	0.352065	1.77473	0.858588	3.43816	2.81873	1.08823	3.6044	4.10136	0.382521	1.10235	9.9437	0.225603	1.56271	2.3007	0.506689	0.874685	1.40598
HT.06.15	21°C	ugt80A2,B1	2.48939	1.38578	9.41759	0.234508	2.03208	5.72672	0.400659	0.230054	3.40401	1.61584	3.12977	2.93564	2.33768	4.37959	5.18548	1.49962	1.73676	0.666952	2.22134	1.09488	2.91031	4.37543	3.39962	2.05733	5.82254	1.92788	10.4752	0.493548	3.13107	0.899859	0.363079	2.65894	0.92023	3.76474	3.13881	1.48961	3.67738	5.06434	0.319589	0.871696	7.40796	0.256218	1.46522	2.32518	0.577038	0.872196	1.41005
HT.06.23	21°C	ugt80A2,B1	2.34108	1.39308	7.84524	0.271195	2.25798	5.90557	0.316726	0.238082	3.27035	1.62616	3.1286	3.01223	2.69554	4.78177	4.36494	1.49148	1.6454	0.804478	2.07403	1.48377	3.00812	4.93752	3.56527	2.03756	5.10852	2.28834	9.46879	0.708885	2.96177	1.03537	0.395255	2.7781	0.952991	3.96111	2.98185	1.16636	3.33412	4.37771	0.409064	0.906006	6.42261	0.22381	1.78842	2.25226	0.644313	0.830597	1.69117
HT.06.26	21°C	ugt80A2,B1	2.67363	1.35854	7.45911	0.217402	2.10395	5.04703	0.376002	0.291417	3.35999	1.40617	3.02461	3.07627	2.25622	4.81138	5.74144	1.54256	1.67958	0.749544	2.10557	1.29248	2.63685	4.07718	3.04502	1.86012	4.82819	1.6762	9.57236	0.569737	3.05767	0.836796	0.40027	2.43744	0.866972	3.53706	2.54365	1.29744	3.24535	3.75163	0.332374	1.12467	7.89693	0.258474	1.55152	2.06184	0.673214	0.902454	1.66497
HT.06.34	21°C	ugt80A2,B1	1.99748	1.14484	7.68279	0.199965	1.89555	5.03472	0.525663	0.355867	3.42001	1.37801	3.1527	2.83912	2.01436	3.74157	4.87284	1.37881	1.7288	0.650104	1.63978	1.56002	2.63307	3.72973	3.33232	1.45231	4.14788	1.69015	9.59788	0.601545	2.96178	0.996102	0.385863	1.99531	0.859766	2.7736	2.93087	1.20048	3.41116	3.77041	0.554701	1.02575	7.77594	0.270018	1.35795	1.95124	0.629984	0.953007	1.58201
HT.06.37	21°C	ugt80A2,B1	2.09553	1.52283	8.22982	0.22963	2.59202	6.30903	0.361019	0.336134	3.71066	1.89093	3.74874	2.9791	2.67989	5.24767	4.70644	1.67578	1.76606	0.671682	2.71937	1.72301	3.41665	4.99221	4.27374	1.75587	4.47658	2.34508	8.19746	0.795525	2.93154	0.944556	0.467428	2.46015	0.87869	4.11458	3.09818	1.13918	3.82135	4.43173	0.432357	0.857812	7.01972	0.246847	1.64877	2.62564	0.662214	0.923345	1.8594
HT.06.60	21°C	ugt80A2,B1	2.28136	1.54599	10.355	0.247495	2.33513	5.68426	0.479523	0.33448	3.52031	1.66931	3.95875	3.53217	2.48708	4.11582	4.89042	1.42268	2.20847	0.825733	2.29943	1.80248	3.06879	4.16523	3.88261	2.45133	4.8501	2.05797	9.96108	0.787112	4.06943	0.945613	0.509885	2.57124	1.03205	3.93494	3.49685	1.60902	4.85155	4.7996	0.44067	0.935255	7.61917	0.295529	1.76135	2.41799	0.734574	1.45614	2.42646
HT.06.71	21°C	ugt80A2,B1	2.00339	1.43842	9.24033	0.240205	2.30685	6.077	0.436012	0.303204	4.33285	1.80616	4.44849	3.2708	2.31918	3.7985	4.77313	1.42143	2.07147	0.801096	2.16995	2.22216	2.71285	4.3657	5.68352	2.54446	5.00022	1.88594	10.0671	0.750491	4.08337	1.0646	0.494085	2.92012	1.099	3.52335	2.91142	1.64563	4.54491	5.09345	0.516761	0.82356	7.60455	0.251444	1.49903	2.4367	0.560924	0.857745	1.66611
HT.05.04	45°C for 12h	ugt80A2,B1	1.91129	1.46157	12.0013	0.65677	105.683	13.8122	8.2868	1.02016	4.74291	65.9916	9.45601	5.77103	4.65446	33.1171	10.4271	1.92002	1.34853	0.527541	11.0786	4.19031	59.6006	8.66581	21.7836	2.19088	8.43854	3.82895	15.0043	144.164	48.7031	9.64986	31.6389	5.86302	2.78567	9.34961	4.60468	6.40468	2.7014	3.85229	0.979847	1.6698	8.60421	0.614718	2.13721	2.57436	0.788412	1.40588	3.89832
HT.05.12	45°C for 12h	ugt80A2,B1	2.20072	1.75085	12.3147	0.462399	202.836	16.1421	12.0836	0.726158	6.81299	158.979	20.2619	7.32718	4.32373	71.2707	17.7917	1.86923	1.92112	0.674252	19.8118	7.36168	141.163	12.4047	41.2591	2.44352	15.0259	5.53247	13.5129	342.728	116.316	15.9454	73.4469	8.53772	3.76774	13.6516	7.09979	6.35617	4.30722	4.33157	0.671103	2.40146	6.59759	0.449275	3.21205	3.20307	0.711836	1.69796	5.4407
HT.05.15	45°C for 12h	ugt80A2,B1	1.32522	1.32284	17.0092	3.13648	33.0354	11.6529	11.5065	3.64938	4.77931	10.0152	3.99778	6.49307	4.88502	10.6262	11.1892	2.78203	2.12212	0.820641	10.1648	5.81699	12.6177	6.46819	15.4813	3.74472	12.1634	5.17296	21.493	22.4157	14.4964	6.21249	10.9263	4.32432	4.58783	5.53139	3.96582	14.1561	3.07819	4.03876	3.03667	1.72286	28.4667	2.10235	1.7444	2.12904	1.4646	1.37855	4.32788
HT.05.23	45°C for 12h	ugt80A2,B1	2.48411	2.06006	10.29	0.455143	237.584	19.1356	13.2606	0.829702	8.75894	193.36	23.5311	5.19468	3.33952	77.4359	18.2892	1.5249	1.68046	0.644607	22.9499	7.91329	176.542	15.0473	52.6598	2.62778	17.9648	6.0304	15.4548	419.41	146.719	22.2197	87.8235	9.78582	4.48744	15.9521	7.31918	7.89089	5.78316	4.48464	0.830577	2.61028	6.60407	0.371183	3.61053	3.11533	0.617035	1.69818	6.13923
HT.05.26	45°C for 12h	ugt80A2,B1	1.86127	1.84374	10.9768	0.616335	145.204	15.7199	10.0271	1.05723	5.64339	83.0111	11.6356	7.27701	4.14067	52.1079	16.3201	2.46119	1.34065	0.534988	13.6994	5.00429	83.5212	11.0966	28.9584	2.52888	10.9189	4.13572	16.7609	210.434	73.0142	12.5924	46.9591	6.61297	3.21862	11.1257	5.26497	7.61666	3.45382	4.09961	1.05326	1.86774	8.13331	0.490138	2.5365	2.95088	0.820861	1.59428	4.63878
HT.05.34	45°C for 12h	ugt80A2,B1	1.68232	1.76423	9.69449	0.67067	111.413	12.5361	8.0264	1.10561	4.73618	90.9993	14.7459	6.38809	4.58686	36.4294	12.203	2.20314	1.75295	0.82415	10.9832	4.59834	63.227	10.5642	19.8278	2.49689	9.04206	4.41935	11.8071	205.456	47.8838	12.2081	39.2611	5.99198	3.33513	8.02991	5.11851	5.07113	2.94992	3.73898	0.825003	1.98949	8.21703	0.569941	2.51661	2.93515	0.900584	1.57308	4.72919
HT.05.37	45°C for 12h	ugt80A2,B1	1.75823	1.6994	10.6358	0.515355	135.572	14.7418	9.05249	0.844446	5.67367	103.228	17.0766	6.09275	4.11034	51.2979	16.5589	2.26208	1.97306	0.665729	12.2868	5.59097	96.8777	11.5805	31.4887	2.61431	13.5822	4.37703	12.1822	245.158	75.1752	14.3478	49.873	6.75773	3.78737	8.55468	5.66189	6.85842	4.46023	3.74937	0.935367	2.11353	7.86209	0.476196	2.6718	2.72505	0.686843	1.28731	5.2349
HT.05.60	45°C for 12h	ugt80A2,B1	2.82504	2.65428	13.91	0.711054	153.746	16.8385	10.9804	1.11551	6.58841	126.699	10.836	6.10031	5.73673	55.1138	17.4211	3.3119	2.35648	1.15442	14.3258	6.29955	96.6531	14.2794	33.6605	3.22548	13.4805	6.50244	14.49	277.677	92.2861	16.182	59.3983	8.02111	4.32469	10.7949	7.20382	6.00482	3.78308	4.47573	0.874031	2.43379	7.05946	0.563949	3.86435	4.16382	1.26111	2.10384	5.92256
HT.05.71	45°C for 12h	ugt80A2,B1	1.96579	1.8966	8.41962	0.4857	144.323	11.2812	9.74757	0.826797	5.65134	113.686	12.3063	8.13406	6.42538	59.8309	20.9177	3.40687	2.13904	0.79276	14.567	6.44643	111.83	10.5611	38.7783	2.39035	11.0543	4.13544	10.1901	255.351	107.189	8.91389	54.1984	5.13926	2.63609	8.0621	5.44197	6.31988	3.71843	3.64319	0.620372	1.69625	5.89019	0.361481	2.8171	2.94839	0.875251	1.19274	4.05168
		Averages
		WT, 21°C	1.71995	1.5163	10.1613	0.246999	2.46025	6.13628	0.481229	0.379467	3.71304	1.68904	3.39213	3.1638	2.17671	3.66563	4.77331	1.32633	1.97378	0.782488	2.19102	1.90334	2.85292	4.06313	3.39763	1.96145	4.49153	1.79868	9.40911	0.709731	3.08794	1.06925	0.476437	2.80321	0.969371	3.34391	3.02492	1.39186	3.92854	4.95914	0.3952	0.856026	6.00169	0.269861	1.55551	2.23221	0.650427	0.893469	1.52104
		WT, 45°C for 12h	1.50752	1.6432	10.4529	0.563481	55.9934	9.1935	5.00566	0.830876	4.13284	38.9409	7.42914	6.36136	3.98163	20.7833	11.138	2.49157	1.99988	0.616565	6.35665	3.21177	34.3044	6.69108	17.8212	2.19175	7.02646	3.18231	14.974	85.4596	35.2671	5.4143	21.9545	3.77621	2.3691	6.87725	3.3716	7.08405	2.54794	3.41384	0.797064	1.27664	6.96688	0.493332	1.81329	2.42757	0.69891	0.987958	2.47132
		ugt80A2,B1, 21°C	2.21925	1.40119	8.34701	0.233607	2.24816	5.73149	0.412422	0.32053	3.57958	1.64081	3.58297	3.11132	2.40972	4.49162	4.97178	1.48253	1.88789	0.755292	2.14637	1.60181	2.97275	4.32212	3.77538	2.03829	4.94169	2.01863	9.30539	0.710068	3.1464	0.958636	0.434751	2.53598	0.947776	3.63703	3.05869	1.31408	3.8112	4.50394	0.422466	0.955594	7.60039	0.258483	1.59631	2.33335	0.634698	0.962719	1.73319
		ugt80A2,B1, 45°C for 12h	2.00156	1.82817	11.6947	0.856656	141.044	14.6511	10.3302	1.24167	5.9319	105.108	13.7608	6.53091	4.68919	49.6922	15.6798	2.41571	1.84827	0.737677	14.4297	5.91354	93.5592	11.1853	31.5442	2.69587	12.4078	4.90386	14.5439	235.866	80.1982	13.1413	50.3917	6.78155	3.65895	10.1169	5.74229	7.40875	3.80394	4.04602	1.0918	2.05613	9.71497	0.666581	2.79006	2.97168	0.902948	1.54798	4.93147
		False Discovery Rate	0.010983	0.021111	0.03641	0.045895	2.2611e-08	1.8163e-10	9.4206e-16	0.0044628	2.925e-05	6.201e-07	6.5296e-06	1.9447e-11	6.7046e-08	6.7232e-08	1.2324e-09	9.0553e-05	0	0	4.7894e-10	3.2151e-11	9.1697e-07	3.5793e-09	2.2822e-08	0.0060784	4.434e-09	6.3693e-10	9.7024e-06	2.161e-07	1.0832e-06	2.2843e-09	8.6011e-08	2.867e-08	3.5317e-12	3.7888e-07	9.7815e-08	1.011e-08	0.0052895	0.00025422	0.0078256	6.633e-10	0	0.038424	1.2205e-05	0.0098177	0.014764	4.0826e-06	9.8263e-13
		Significant comparisons by one-way ANOVA and FDR, with Tukey's HSD poshoc test. Highlight indicates those comparisons that are significant for WT/45°Cfor12h-ugt80A2,B1/45°Cfor12h.	WT/45°Cfor12h-ugt80A2,B1/21°C	ugt80A2,B1/45°Cfor12h-ugt80A2,B1/21°C	ugt80A2,B1/45°Cfor12h-ugt80A2,B1/21°C	ugt80A2,B1/45°Cfor12h-ugt80A2,B1/21°C	ugt80A2,B1/45°Cfor12h-ugt80A2,B1/21°C; WT/45°Cfor12h-ugt80A2,B1/21°C; WT/21°C-ugt80A2,B1/45°Cfor12h; WT/45°Cfor12h-ugt80A2,B1/45°Cfor12h	ugt80A2,B1/45°Cfor12h-ugt80A2,B1/21°C; WT/45°Cfor12h-ugt80A2,B1/21°C; WT/21°C-ugt80A2,B1/45°Cfor12h; WT/45°Cfor12h-ugt80A2,B1/45°Cfor12h; WT/45°Cfor12h-WT/21°C	ugt80A2,B1/45°Cfor12h-ugt80A2,B1/21°C; WT/45°Cfor12h-ugt80A2,B1/21°C; WT/21°C-ugt80A2,B1/45°Cfor12h; WT/45°Cfor12h-ugt80A2,B1/45°Cfor12h; WT/45°Cfor12h-WT/21°C	ugt80A2,B1/45°Cfor12h-ugt80A2,B1/21°C; WT/21°C-ugt80A2,B1/45°Cfor12h	ugt80A2,B1/45°Cfor12h-ugt80A2,B1/21°C; WT/21°C-ugt80A2,B1/45°Cfor12h; WT/45°Cfor12h-ugt80A2,B1/45°Cfor12h	ugt80A2,B1/45°Cfor12h-ugt80A2,B1/21°C; WT/21°C-ugt80A2,B1/45°Cfor12h; WT/45°Cfor12h-ugt80A2,B1/45°Cfor12h	ugt80A2,B1/45°Cfor12h-ugt80A2,B1/21°C; WT/21°C-ugt80A2,B1/45°Cfor12h; WT/45°Cfor12h-ugt80A2,B1/45°Cfor12h	ugt80A2,B1/45°Cfor12h-ugt80A2,B1/21°C; WT/45°Cfor12h-ugt80A2,B1/21°C; WT/21°C-ugt80A2,B1/45°Cfor12h; WT/45°Cfor12h-WT/21°C	ugt80A2,B1/45°Cfor12h-ugt80A2,B1/21°C; WT/45°Cfor12h-ugt80A2,B1/21°C; WT/21°C-ugt80A2,B1/45°Cfor12h; WT/45°Cfor12h-WT/21°C	ugt80A2,B1/45°Cfor12h-ugt80A2,B1/21°C; WT/21°C-ugt80A2,B1/45°Cfor12h; WT/45°Cfor12h-ugt80A2,B1/45°Cfor12h	ugt80A2,B1/45°Cfor12h-ugt80A2,B1/21°C; WT/45°Cfor12h-ugt80A2,B1/21°C; WT/21°C-ugt80A2,B1/45°Cfor12h; WT/45°Cfor12h-ugt80A2,B1/45°Cfor12h; WT/45°Cfor12h-WT/21°C	ugt80A2,B1/45°Cfor12h-ugt80A2,B1/21°C; WT/45°Cfor12h-ugt80A2,B1/21°C; WT/21°C-ugt80A2,B1/45°Cfor12h; WT/45°Cfor12h-WT/21°C	0	0	ugt80A2,B1/45°Cfor12h-ugt80A2,B1/21°C; WT/45°Cfor12h-ugt80A2,B1/21°C; WT/21°C-ugt80A2,B1/45°Cfor12h; WT/45°Cfor12h-ugt80A2,B1/45°Cfor12h; WT/45°Cfor12h-WT/21°C	ugt80A2,B1/45°Cfor12h-ugt80A2,B1/21°C; WT/45°Cfor12h-ugt80A2,B1/21°C; WT/21°C-ugt80A2,B1/45°Cfor12h; WT/45°Cfor12h-ugt80A2,B1/45°Cfor12h; WT/45°Cfor12h-WT/21°C	ugt80A2,B1/45°Cfor12h-ugt80A2,B1/21°C; WT/21°C-ugt80A2,B1/45°Cfor12h; WT/45°Cfor12h-ugt80A2,B1/45°Cfor12h	ugt80A2,B1/45°Cfor12h-ugt80A2,B1/21°C; WT/45°Cfor12h-ugt80A2,B1/21°C; WT/21°C-ugt80A2,B1/45°Cfor12h; WT/45°Cfor12h-ugt80A2,B1/45°Cfor12h; WT/45°Cfor12h-WT/21°C	ugt80A2,B1/45°Cfor12h-ugt80A2,B1/21°C; WT/45°Cfor12h-ugt80A2,B1/21°C; WT/21°C-ugt80A2,B1/45°Cfor12h; WT/45°Cfor12h-ugt80A2,B1/45°Cfor12h; WT/45°Cfor12h-WT/21°C	ugt80A2,B1/45°Cfor12h-ugt80A2,B1/21°C; WT/21°C-ugt80A2,B1/45°Cfor12h	ugt80A2,B1/45°Cfor12h-ugt80A2,B1/21°C; WT/21°C-ugt80A2,B1/45°Cfor12h; WT/45°Cfor12h-ugt80A2,B1/45°Cfor12h	ugt80A2,B1/45°Cfor12h-ugt80A2,B1/21°C; WT/45°Cfor12h-ugt80A2,B1/21°C; WT/21°C-ugt80A2,B1/45°Cfor12h; WT/45°Cfor12h-ugt80A2,B1/45°Cfor12h; WT/45°Cfor12h-WT/21°C	ugt80A2,B1/45°Cfor12h-ugt80A2,B1/21°C; WT/45°Cfor12h-ugt80A2,B1/21°C; WT/21°C-ugt80A2,B1/45°Cfor12h; WT/45°Cfor12h-WT/21°C	ugt80A2,B1/45°Cfor12h-ugt80A2,B1/21°C; WT/21°C-ugt80A2,B1/45°Cfor12h; WT/45°Cfor12h-ugt80A2,B1/45°Cfor12h	ugt80A2,B1/45°Cfor12h-ugt80A2,B1/21°C; WT/21°C-ugt80A2,B1/45°Cfor12h; WT/45°Cfor12h-ugt80A2,B1/45°Cfor12h	ugt80A2,B1/45°Cfor12h-ugt80A2,B1/21°C; WT/45°Cfor12h-ugt80A2,B1/21°C; WT/21°C-ugt80A2,B1/45°Cfor12h; WT/45°Cfor12h-ugt80A2,B1/45°Cfor12h; WT/45°Cfor12h-WT/21°C	ugt80A2,B1/45°Cfor12h-ugt80A2,B1/21°C; WT/45°Cfor12h-ugt80A2,B1/21°C; WT/21°C-ugt80A2,B1/45°Cfor12h; WT/45°Cfor12h-ugt80A2,B1/45°Cfor12h; WT/45°Cfor12h-WT/21°C	ugt80A2,B1/45°Cfor12h-ugt80A2,B1/21°C; WT/21°C-ugt80A2,B1/45°Cfor12h; WT/45°Cfor12h-ugt80A2,B1/45°Cfor12h	ugt80A2,B1/45°Cfor12h-ugt80A2,B1/21°C; WT/45°Cfor12h-ugt80A2,B1/21°C; WT/21°C-ugt80A2,B1/45°Cfor12h; WT/45°Cfor12h-ugt80A2,B1/45°Cfor12h; WT/45°Cfor12h-WT/21°C	ugt80A2,B1/45°Cfor12h-ugt80A2,B1/21°C; WT/45°Cfor12h-ugt80A2,B1/21°C; WT/21°C-ugt80A2,B1/45°Cfor12h; WT/45°Cfor12h-ugt80A2,B1/45°Cfor12h; WT/45°Cfor12h-WT/21°C	ugt80A2,B1/45°Cfor12h-ugt80A2,B1/21°C; WT/21°C-ugt80A2,B1/45°Cfor12h; WT/45°Cfor12h-ugt80A2,B1/45°Cfor12h	ugt80A2,B1/45°Cfor12h-ugt80A2,B1/21°C; WT/45°Cfor12h-ugt80A2,B1/21°C; WT/21°C-ugt80A2,B1/45°Cfor12h; WT/45°Cfor12h-WT/21°C	WT/45°Cfor12h-ugt80A2,B1/21°C; WT/45°Cfor12h-ugt80A2,B1/45°Cfor12h; WT/45°Cfor12h-WT/21°C	WT/45°Cfor12h-ugt80A2,B1/21°C; WT/21°C-ugt80A2,B1/45°Cfor12h; WT/45°Cfor12h-WT/21°C	ugt80A2,B1/45°Cfor12h-ugt80A2,B1/21°C; WT/21°C-ugt80A2,B1/45°Cfor12h	ugt80A2,B1/45°Cfor12h-ugt80A2,B1/21°C; WT/21°C-ugt80A2,B1/45°Cfor12h; WT/45°Cfor12h-ugt80A2,B1/45°Cfor12h; WT/45°Cfor12h-WT/21°C	0	ugt80A2,B1/45°Cfor12h-ugt80A2,B1/21°C	ugt80A2,B1/45°Cfor12h-ugt80A2,B1/21°C; WT/21°C-ugt80A2,B1/45°Cfor12h; WT/45°Cfor12h-ugt80A2,B1/45°Cfor12h	ugt80A2,B1/45°Cfor12h-ugt80A2,B1/21°C; WT/21°C-ugt80A2,B1/45°Cfor12h	ugt80A2,B1/45°Cfor12h-ugt80A2,B1/21°C; WT/21°C-ugt80A2,B1/45°Cfor12h	ugt80A2,B1/45°Cfor12h-ugt80A2,B1/21°C; WT/21°C-ugt80A2,B1/45°Cfor12h; WT/45°Cfor12h-ugt80A2,B1/45°Cfor12h	ugt80A2,B1/45°Cfor12h-ugt80A2,B1/21°C; WT/45°Cfor12h-ugt80A2,B1/21°C; WT/21°C-ugt80A2,B1/45°Cfor12h; WT/45°Cfor12h-ugt80A2,B1/45°Cfor12h; WT/45°Cfor12h-WT/21°C
[truncated: 229 more columns]

## Sheet: Table S9
Table S9. Levels of major leaf lipid head group classes from wild-type and ugt80A2,B1 double mutant plants, before and after severe heat treatment. Lipid amounts are presented as normalized intensity per mg of leaf dry mass, where a signal of 1 corresponds to the same amount of signal as derived from 1 pmol of internal standard(s). Data from 6 biological replicates of each treatment for wild-type…
Sample name ("HT" for "high temperature".Tray number.Well number in tray)	Treatment	Genotype	acMGDG	DAG	DGDG	DGMG	LPC	LPE	MGDG	MGMG	PA	PC	PE	PG	SG	ASG	Sterol esters	SQDG	TAG	TrGDG & TeGDG
HT.06.01	21°C	WT	163.394	0.659751	6013.35	3.83078	1.26263	3.71707	51384	84.3293	6.63529	1060.72	1558.43	1323.38	359.43	1416.02	0.58572	62.996	9.11397	11.2355
HT.06.24	21°C	WT	120.693	0.688901	6518.51	3.2994	1.28741	3.36363	55845.2	68.897	2.88589	1310.41	1738.26	1494.82	384.241	1395.04	0.761198	77.4791	8.51619	5.44127
HT.06.35	21°C	WT	129.671	0.731756	5658.34	3.36949	1.22443	4.01321	48046.3	62.383	5.46032	1134.65	1564.77	1330	353.189	1080.42	0.759071	76.1765	9.53077	7.09604
HT.06.46	21°C	WT	110.602	0.667177	6171.63	3.11713	1.21317	3.56383	51625.8	61.1614	4.7441	1162.56	1628.4	1371.13	443.017	1143.49	0.434694	79.7525	8.77735	6.22258
HT.06.57	21°C	WT	110.453	0.711611	5550.53	3.31809	1.09536	3.78913	45903	55.6068	4.54907	1081.12	1540.51	1270.87	360.902	1000.59	0.735109	73.7799	9.11835	6.72986
HT.06.68	21°C	WT	130.82	0.617779	5997.36	3.65374	1.15622	4.07624	52735.3	67.8279	3.3091	1200.34	1723.86	1377	374.799	1005.46	0.834032	75.7131	7.03197	7.45113
HT.05.01	45°C for 12h	WT	569.894	7.8103	3596.22	27.2022	21.3985	19.6182	8826.97	139.966	76.6788	234.819	251.208	741.01	691.262	15767.4	0.0788688	54.991	1617.92	344.4
HT.05.24	45°C for 12h	WT	764.033	8.91939	3169.96	26.5173	20.1124	15.9951	7587.48	100.124	90.016	61.3955	75.9753	564.939	572.594	11671.7	0.186957	56.6912	1131.86	385.737
HT.05.46	45°C for 12h	WT	392.005	5.50882	2565.35	19.9535	11.5839	13.384	5592.85	101.771	89.1171	223.973	230.809	643.029	481.715	10629.8	0.059892	43.6908	1248.92	267.482
HT.05.57	45°C for 12h	WT	449.612	5.75567	3323.62	21.9765	12.0198	10.4278	11085.8	128.462	28.8612	410.199	407.361	577.179	571.126	10445.9	0.0919366	49.2567	972.075	412.835
HT.05.68	45°C for 12h	WT	355.142	6.54364	3176.95	25.9756	23.5486	16.2107	9204.26	123.784	48.872	229.587	240.206	659.781	591.872	9091.93	0.0845783	49.2547	1097.07	384.373
HT.05.35	45°C for 12h	WT	368.987	7.55072	2550.35	19.0273	12.3601	13.5708	5050.69	96.3726	67.2625	104.588	113.963	528.634	499.718	10696	0.0840621	42.5273	1177.31	309.856
HT.06.04	21°C	ugt80A2,B1	141.42	0.669359	5697.39	3.87364	1.06898	3.73356	45953.2	70.9053	0.84723	1051.76	1479	1247.58	42.4306	420.216	1.46555	60.9748	6.03498	9.12049
HT.06.12	21°C	ugt80A2,B1	120.941	0.780147	5773.05	3.28871	1.09631	1.61258	49448.8	55.9547	3.1777	1491.67	2015.63	1551.87	30.7347	198.48	0.9461	66.6423	7.58442	4.30436
HT.06.15	21°C	ugt80A2,B1	128.759	0.853464	6550.94	2.96786	1.18169	2.63666	57017	62.1749	4.06754	1391.69	1845.05	1479.02	46.9583	376.968	1.59077	80.1857	8.61909	6.57763
HT.06.23	21°C	ugt80A2,B1	129.035	0.84004	6113.63	5.25362	1.43134	3.31798	50942.6	69.2594	4.5159	1353.99	1731.79	1429.58	44.8343	327.528	1.91852	70.8021	8.84151	5.65451
HT.06.26	21°C	ugt80A2,B1	122.475	0.793835	6181.94	3.36609	1.36924	2.10802	53429.6	53.8291	4.90458	1390.66	1750.71	1525.27	38.5067	297.169	1.95943	82.1867	9.09284	4.65801
HT.06.34	21°C	ugt80A2,B1	116.778	0.739558	5642.46	3.34758	1.2162	2.43706	48818.4	47.14	4.80905	1278.11	1762.22	1447.69	26.4729	221.965	1.40574	72.8211	7.68715	5.49114
HT.06.37	21°C	ugt80A2,B1	134.66	0.773689	6200.21	3.32583	1.19782	2.69489	54043.9	68.2183	5.87499	1351.05	1865.14	1442.23	41.113	338.684	1.37309	75.1413	7.52388	6.60875
HT.06.60	21°C	ugt80A2,B1	140.935	0.682303	6119.33	4.30604	1.41787	3.13693	52279.3	64.2046	4.63499	1338.78	1793.55	1470.21	42.3522	331.831	1.42396	82.5096	7.59709	7.90046
HT.06.71	21°C	ugt80A2,B1	139.16	0.675536	6428.33	3.27134	1.16233	2.8729	56205.6	63.3835	3.03177	1248.14	1724.6	1424.5	43.3981	406.435	1.78215	79.3278	6.93952	7.58619
HT.05.04	45°C for 12h	ugt80A2,B1	723.758	6.73809	2566.02	21.2936	16.6956	14.9881	5954.16	133.646	52.1375	139.374	148.393	630.928	81.68	2814.19	0.792384	47.2725	1126.09	276.486
HT.05.12	45°C for 12h	ugt80A2,B1	1436.67	9.94237	2597.06	26.1204	25.4361	15.4934	6782.78	137.961	139.317	72.1216	88.9667	603.596	90.5871	2541.56	0.728227	51.7571	1012.89	242.082
HT.05.15	45°C for 12h	ugt80A2,B1	393.237	2.97483	2686.02	24.7	17.506	10.7669	7257.74	107.853	42.0661	254.957	197.339	561.153	109.805	2428.41	0.650057	42.4546	1199.44	270.794
HT.05.23	45°C for 12h	ugt80A2,B1	1716.29	8.57649	2149.58	18.6113	26.4351	13.6515	4833.34	106.312	147.909	37.244	54.4611	427.734	75.062	2612.77	0.52527	48.2778	840.408	187.759
HT.05.26	45°C for 12h	ugt80A2,B1	972.925	7.6765	2401.42	24.0628	16.4045	13.464	4337.56	113.908	78.864	51.0127	71.0122	491.676	81.8584	2781.3	0.9947	52.8217	1080.12	264.353
HT.05.34	45°C for 12h	ugt80A2,B1	840.726	6.01005	2232.26	21.0139	21.7609	15.4067	6009	168.504	127.715	147.603	134.677	664.564	94.7455	2563.75	0.468613	44.175	1052.77	172.644
HT.05.37	45°C for 12h	ugt80A2,B1	1037.75	6.70952	2123.21	23.0076	21.5846	12.8994	5171.53	118.892	242.289	109.566	130.697	465.455	82.2535	2128.87	0.564855	45.7958	1035.78	186.451
HT.05.60	45°C for 12h	ugt80A2,B1	1179.56	7.21231	2387.35	23.0111	19.023	13.3855	5835.47	213.256	49.7463	52.4659	73.7956	478.91	94.8794	2858.61	0.656867	49.833	890.15	216.593
HT.05.71	45°C for 12h	ugt80A2,B1	1121.03	6.00995	3000.81	38.0922	26.1855	13.2632	8969.14	129.494	119.019	255.52	230.895	471.339	112.333	2099.7	0.662487	44.7427	899.023	357.977
		Averages
		WT, 21°C	127.605	0.679496	5984.96	3.43144	1.20653	3.75385	50923.3	66.7009	4.59729	1158.3	1625.71	1361.2	379.263	1173.5	0.684971	74.3162	8.68143	7.36273
		WT, 45°C for 12h	483.279	7.01476	3063.74	23.4421	16.8372	14.8677	7891.34	115.08	66.8013	210.76	219.92	619.095	568.048	11383.8	0.0977157	49.4019	1207.53	350.781
		ugt80A2,B1, 21°C	130.463	0.756437	6078.59	3.66675	1.23798	2.72784	52015.4	61.6744	3.98486	1321.76	1774.19	1446.44	39.6445	324.364	1.54059	74.5102	7.76894	6.43351
		ugt80A2,B1, 45°C for 12h	1046.88	6.87224	2460.42	24.4348	21.2257	13.7021	6127.86	136.647	111.007	124.43	125.582	532.817	91.4672	2536.57	0.671496	47.4589	1015.18	241.682
		Standard deviation
		WT, 21°C	19.6291	0.0405007	350.966	0.261457	0.0706307	0.26914	3512.69	9.89204	1.37916	90.5111	86.9573	75.8498	33.2256	187.401	0.147325	5.88907	0.878248	2.02335
		WT, 45°C for 12h	158.285	1.31323	421.218	3.57273	5.42998	3.13808	2291.22	18.0271	24.0649	122.038	117.124	77.414	74.702	2301	0.0450382	5.7322	221.094	54.5076
		ugt80A2,B1, 21°C	9.14919	0.0694356	316.753	0.712904	0.135363	0.63934	3596.3	7.91083	1.46688	122.942	143.201	86.0862	6.76327	75.856	0.315837	7.42001	0.965061	1.57847
		ugt80A2,B1, 45°C for 12h	387.76	1.93047	283.715	5.58036	4.06715	1.47395	1401.06	34.5096	63.9787	83.7479	60.1328	84.2271	12.9276	277.494	0.156909	3.52751	118.311	58.5784
			acMGDG	DAG	DGDG	DGMG	LPC	LPE	MGDG	MGMG	PA	PC	PE	PG	SG	ASG	Sterol esters	SQDG	TAG	TrGDG TeGDG
		False Discovery Rate	1.1423e-08	4.4944e-12	1.0101e-18	2.1114e-13	4.8239e-13	8.2628e-15	4.0418e-23	1.5632e-07	3.9016e-06	5.1422e-19	2.0009e-22	5.1422e-19	6.0181e-20	1.8361e-16	5.8419e-12	6.0391e-11	4.726e-18	2.2115e-15
		Significant comparisons by one-way ANOVA and FDR, with Tukey's HSD poshoc test. Highlight indicates those comparisons that are significant for WT-45-ugt80A2,B1-45.	ugt80A2,B1-45-ugt80A2,B1-21; WT-45-ugt80A2,B1-21; WT-21-ugt80A2,B1-45; WT-45-ugt80A2,B1-45	ugt80A2,B1-45-ugt80A2,B1-21; WT-45-ugt80A2,B1-21; WT-21-ugt80A2,B1-45; WT-45-WT-21	ugt80A2,B1-45-ugt80A2,B1-21; WT-45-ugt80A2,B1-21; WT-21-ugt80A2,B1-45; WT-45-ugt80A2,B1-45; WT-45-WT-21	ugt80A2,B1-45-ugt80A2,B1-21; WT-45-ugt80A2,B1-21; WT-21-ugt80A2,B1-45; WT-45-WT-21	ugt80A2,B1-45-ugt80A2,B1-21; WT-45-ugt80A2,B1-21; WT-21-ugt80A2,B1-45; WT-45-WT-21	ugt80A2,B1-45-ugt80A2,B1-21; WT-45-ugt80A2,B1-21; WT-21-ugt80A2,B1-45; WT-45-WT-21	ugt80A2,B1-45-ugt80A2,B1-21; WT-45-ugt80A2,B1-21; WT-21-ugt80A2,B1-45; WT-45-WT-21	ugt80A2,B1-45-ugt80A2,B1-21; WT-45-ugt80A2,B1-21; WT-21-ugt80A2,B1-45; WT-45-WT-21	ugt80A2,B1-45-ugt80A2,B1-21; WT-45-ugt80A2,B1-21; WT-21-ugt80A2,B1-45; WT-45-WT-21	ugt80A2,B1-45-ugt80A2,B1-21; WT-21-ugt80A2,B1-21; WT-45-ugt80A2,B1-21; WT-21-ugt80A2,B1-45; WT-45-WT-21	ugt80A2,B1-45-ugt80A2,B1-21; WT-45-ugt80A2,B1-21; WT-21-ugt80A2,B1-45; WT-45-WT-21	ugt80A2,B1-45-ugt80A2,B1-21; WT-45-ugt80A2,B1-21; WT-21-ugt80A2,B1-45; WT-45-WT-21	ugt80A2,B1-45-ugt80A2,B1-21; WT-21-ugt80A2,B1-21; WT-45-ugt80A2,B1-21; WT-21-ugt80A2,B1-45; WT-45-ugt80A2,B1-45; WT-45-WT-21	ugt80A2,B1-45-ugt80A2,B1-21; WT-45-ugt80A2,B1-21; WT-45-ugt80A2,B1-45; WT-45-WT-21	ugt80A2,B1-45-ugt80A2,B1-21; WT-21-ugt80A2,B1-21; WT-45-ugt80A2,B1-21; WT-45-ugt80A2,B1-45; WT-45-WT-21	ugt80A2,B1-45-ugt80A2,B1-21; WT-45-ugt80A2,B1-21; WT-21-ugt80A2,B1-45; WT-45-WT-21	ugt80A2,B1-45-ugt80A2,B1-21; WT-45-ugt80A2,B1-21; WT-21-ugt80A2,B1-45; WT-45-ugt80A2,B1-45; WT-45-WT-21	ugt80A2,B1-45-ugt80A2,B1-21; WT-45-ugt80A2,B1-21; WT-21-ugt80A2,B1-45; WT-45-ugt80A2,B1-45; WT-45-WT-21

## Sheet: Table S10
Table S10. Arrangement of samples for mass spectral lipid profiling on the first three mass spectrometry sample trays of the main experiment. The type of autosampler tray used for lipid profiling was VT-54 (LEAP Technologies, Carrboro, NC, USA). This tray has 54 slots for vials, of which the first 39 slots of each tray were used. Quality control (QC) samples were labeled QC1 to QC39. Names of sam…
VT-54 tray	VT-54 slot number	QC number, IS number, or Sample name ("H" for "heat"+Block number.Tray number.Well number in tray)
1	1	QC01
1	2	QC02
1	3	QC03
1	4	QC04
1	5	QC05
1	6	QC06
1	7	H1.01.09
1	8	H1.01.11
1	9	H1.01.22
1	10	IS01
1	11	QC07
1	12	H1.01.23
1	13	H1.01.28
1	14	H1.01.48
1	15	QC08
1	16	H1.01.52
1	17	H1.01.54
1	18	H1.01.71
1	19	H1.02.09
1	20	QC09
1	21	H1.02.11
1	22	H1.02.22
1	23	H1.02.23
1	24	H1.02.28
1	25	QC10
1	26	H1.02.48
1	27	H1.02.52
1	28	H1.02.54
1	29	H1.02.71
1	30	IS02
1	31	QC11
1	32	H1.03.09
1	33	H1.03.11
1	34	H1.03.22
1	35	QC12
1	36	H1.03.23
1	37	H1.03.28
1	38	H1.03.48
1	39	QC13
2	1	QC14
2	2	QC15
2	3	QC16
2	4	QC17
2	5	QC18
2	6	QC19
2	7	H1.03.52
2	8	H1.03.54
2	9	H1.03.71
2	10	IS03
2	11	QC20
2	12	H1.04.09
2	13	H1.04.11
2	14	H1.04.22
2	15	QC21
2	16	H1.04.23
2	17	H1.04.28
2	18	H1.04.48
2	19	H1.04.52
2	20	QC22
2	21	H1.04.54
2	22	H1.04.71
2	23	H1.05.09
2	24	H1.05.11
2	25	QC23
2	26	H1.05.22
2	27	H1.05.23
2	28	H1.05.28
2	29	H1.05.48
2	30	IS04
2	31	QC24
2	32	H1.05.52
2	33	H1.05.54
2	34	H1.05.71
2	35	QC25
2	36	H1.06.09
2	37	H1.06.11
2	38	H1.06.22
2	39	QC26
3	1	QC27
3	2	QC28
3	3	QC29
3	4	QC30
3	5	QC31
3	6	QC32
3	7	H1.06.23
3	8	H1.06.28
3	9	H1.06.48
3	10	IS05
3	11	QC33
3	12	H1.06.52
3	13	H1.06.54
3	14	H1.06.71
3	15	QC34
3	16	H1.07.09
3	17	H1.07.11
3	18	H1.07.22
3	19	H1.07.23
3	20	QC35
3	21	H1.07.28
3	22	H1.07.48
3	23	H1.07.52
3	24	H1.07.54
3	25	QC36
3	26	H1.07.71
3	27	H1.08.09
3	28	H1.08.11
3	29	H1.08.22
3	30	IS06
3	31	QC37
3	32	H1.08.23
3	33	H1.08.28
3	34	H1.08.48
3	35	QC38
3	36	H1.08.52
3	37	H1.08.54
3	38	H1.08.71
3	39	QC39
